# Supplementary material for: The Metano Modeling Toolbox MMTB: An Intuitive, Web-Based Toolbox Introduced by Two Use Cases
Source: Metabolites. 2021 Feb 17;11(2):113. doi: 10.3390/metabo11020113 (PMC7923039; doi:10.3390/metabo11020113)
Supplement: Supplementary file 1 [file metabolites-11-00113-s001.zip › Table-S1.xlsx]

## Sheet: reactions
Table S1. The metabolic model of Phaeobacter inhibens DSM 17395 with integrated annotation. The max. confidence score is the highest score for this enzyme from the EnzymeDetector. The whole EnzymeDetector annotation was appended as sheet to this table.
EC	reaction ID	reaction	max. confidence score	comment
	T_ex_C_beta-D-glucose	1 beta-D-glucose_ex <=>	-
1.1.1.100	cis-dodecenoyl-biosynthesis_1.1.1.100_RXN0-2142	1 (3R)-hydroxy-cis-D5-dodecenoyl-[ACP] + 1 NADP+ <-- 1 H+ + 1 3-oxo-cis-D5-dodecenoyl-[ACP] + 1 NADPH	1.6	swi: adapted
1.1.1.100	cis-vaccenate-biosynthesis_1.1.1.100_RXN-9556	1 (R)-3-hydroxy-cis-vaccenoyl-[ACP] + 1 NADP+ <-- 1 3-oxo-cis-vaccenoyl-[ACP] + 1 H+ + 1 NADPH	1.6	swi: adapted
1.1.1.100	palmitate-biosynthesis_1.1.1.100_RXN-9514	1 Acetoacetyl-[ACP]+ 1 NADPH + 1 H+ --> 1 (R)-3-hydroxy-butanoyl-[ACP] + 1 NADP+	1.6	swi: adapted
1.1.1.100	palmitate-biosynthesis_1.1.1.100_RXN-9518	1 (R)-3-hydroxy-hexanoyl-[ACP] + 1 NADP+ <-- 1 3-oxo-hexanoyl-[ACP] + 1 H+ + 1 NADPH	1.6	swi: adapted
1.1.1.100	palmitate-biosynthesis_1.1.1.100_RXN-9524	1 NADP+ + 1 (R)-3-hydroxy-octanoyl-[ACP] <-- 1 NADPH + 1 H+ + 1 |3-oxo-octanoyl-[ACP]	1.6	swi: adapted
1.1.1.100	palmitate-biosynthesis_1.1.1.100_RXN-9528	1 NADP+ + 1 (R)-3-hydroxy-decanoyl-[ACP] <-- 1 H+ + 1 3-oxo-decanoyl-[ACP] + 1 NADPH	1.6	swi: adapted
1.1.1.100	palmitate-biosynthesis_1.1.1.100_RXN-9532	1 NADP+ + 1 (R)-3-hydroxy-dodecanoyl-[ACP] <-- 1 NADPH + 1 3-oxo-dodecanoyl-[ACP] + 1 H+	1.6	swi: adapted
1.1.1.100	palmitate-biosynthesis_1.1.1.100_RXN-9536	1 NADP+ + 1 (R)-3-hydroxy-tetradecanoyl-[ACP] <-- 1 NADPH + 1 3-oxo-tetradecanoyl-[ACP] + 1 H+	1.6	swi: adapted
1.1.1.100	palmitate-biosynthesis_1.1.1.100_RXN-9540	1 NADP+ + 1 (R)-3-hydroxy-hexadecanoyl-[ACP] <-- 1 NADPH + 1 3-oxo-hexadecanoyl-[ACP] + 1 H+	1.6	swi: adapted
1.1.1.100	palmitoleate-biosynthesis-I_1.1.1.100_RXN-10655	1 NADP+ + 1 (3R)-hydroxy-cis-D7-tetradecenoyl-[ACP] <-- 1 3-oxo-cis-D7-tetradecenoyl-[ACP] + 1 NADPH + 1 H+	1.6	swi: adapted
1.1.1.100	palmitoleate-biosynthesis-I_1.1.1.100_RXN-10659	1 NADP+ + 1 (3R)-hydroxy-cis-D9-hexaecenoyl-[ACP] <-- 1 3-oxo-cis-D9-hexadecenoyl-[ACP] + 1 H+ + 1 NADPH	1.6	swi: adapted
1.1.1.100	stearate-biosynthesis_1.1.1.100_RXN-9633	1 NADP+ + 1 (R)-3-hydroxy-octadecanoyl-[ACP] <-- 1 NADPH + 1 3-oxo-octadecanoyl-[ACP] + 1 H+	1.6	swi: adapted
1.1.1.103	threonine-degradation_aminopropanol-phosphate-biosynthesis_1.1.1.103_THREODEHYD-RXN	1 L-threonine + 1 NAD+ --> 2 H+ + 1 NADH + 1 2-amino-3-oxobutanoate	0.73
1.1.1.14	mannitol-degra_1.1.1.67_MANNDEHYDR-RXN	1 mannitol + 1 NAD+ --> 1 beta-D-fructofuranose + 1 NADH + 1 H+	0.73	swi: manual
1.1.1.169	phosphopantothenate-biosynthesis_1.1.1.169_2-DEHYDROPANTOATE-REDUCT-RXN	1 (R)-pantoate + 1 NADP+ <-- 1 H+ + 1 NADPH + 1 2-dehydropantoate	0
1.1.1.178	isoleucine-degradation_2-methylbutyrate-biosynthesis_1.1.1.178_1.1.1.178-RXN	1 2-methyl-3-hydroxybutyryl-CoA + 1 NAD+ <=> 1 NADH + 1 H+ + 1 2-methylacetoacetyl-CoA	0.85
1.1.1.18	~multiple-pathways_1.1.1.18_MYO-INOSITOL-2-DEHYDROGENASE-RXN	1 myo-inositol + 1 NAD+ <=> 1 NADH + 1 scyllo-inosose + 1 H+	0.64
1.1.1.193	flavin-biosynthesis_1.1.1.193_RIBOFLAVINSYNREDUC-RXN	1 5-amino-6-(5-phospho-D-ribitylamino)uracil + 1 NADP+ <-- 1 NADPH + 1 H+ + 1 5-amino-6-(5-phospho-D-ribosylamino)uracil	3.15
1.1.1.205	purine-nucleotides-de-novo-biosynthesis_urate-biosynthesis_1.1.1.205_IMP-DEHYDROG-RXN	1 NAD+ + 1 H2O + 1 IMP <=> 1 NADH + 1 H+ + 1 XMP	3.24
1.1.1.23	histidine-biosynthesis-I_1.1.1.23_HISTALDEHYD-RXN	1 H2O + 1 NAD+ + 1 histidinal --> 1 NADH + 2 H+ + 1 L-histidine	2.37
1.1.1.23	histidine-biosynthesis-I_1.1.1.23_HISTOLDEHYD-RXN	1 histidinol + 1 NAD+ --> 1 histidinal + 1 H+ + 1 NADH	2.37	swi: irreversible
1.1.1.25	~no-pathway_1.1.1.25_RXN-7968_NADP	1 NADP+ + 1 shikimate <-- 1 3-dehydroshikimate + 1 NADPH + 1 H+	3.24
1.1.1.26	~metabolism-of-degradation_1.1.1.26_BR29285	1 glycolate + 1 NAD+ <=> 1 H+ + 1 NADH + 1 glyoxylate	1.54
1.1.1.267	methylerythritol-phosphate-pathway_1.1.1.267_DXPREDISOM-RXN	1 NADP+ + 1 2-C-methyl-D-erythritol_4-phosphate <=> 1 H+ + 1 NADPH + 1 1-deoxy-D-xylulose_5-phosphate	3.24
1.1.1.3	homoserine-biosynthesis_1.1.1.3_HOMOSERDEHYDROG-RXN_NAD	1 NAD+ + 1 L-homoserine <-- 1 L-aspartate-semialdehyde + 1 NADH + 1 H+	3.15
1.1.1.3	homoserine-biosynthesis_1.1.1.3_HOMOSERDEHYDROG-RXN_NADP	1 L-homoserine + 1 NADP+ <-- 1 H+ + 1 NADPH + 1 L-aspartate-semialdehyde	3.15
1.1.1.30	-no_pathway-1.1.1.30-3-HYDROXYBUTYRATE-DEHYDROGENASE-RXN	1 (R)-3-hydroxybutanoate + 1 NAD+ <=> 1 acetoacetate + 1 NADH + 1 H+	0.73	swi: manual; DFL12
1.1.1.31	valine-degradation-I_1.1.1.31_3-HYDROXYISOBUTYRATE-DEHYDROGENASE-RXN	1 NAD+ + 1 (S)-3-hydroxy-isobutanoate --> 1 H+ + 1 NADH + 1 (S)-methylmalonate-semialdehyde	1.6
1.1.1.35	acetyl-CoA-fermentation-to-butyrate_glutaryl-CoA-degradation_1.1.1.35_RXN-11662	1 NAD+ + 1 (S)-3-hydroxybutanoyl-CoA <=> 1 NADH + 1 H+ + 1 acetoacetyl-CoA	0.73
1.1.1.35	benzoyl-CoA-degradation_phenylacetate-degradation_1.1.1.35_RXN0-2044	1 3-hydroxyadipyl-CoA + 1 NAD+ <=> 1 H+ + 1 NADH + 1 3-oxoadipyl-CoA	0.73
1.1.1.36	~multiple-pathways_1.1.1.36_RXN-5901	1 (R)-3-hydroxybutanoyl-CoA + 1 NADP+ <-- 1 H+ + 1 NADPH + 1 acetoacetyl-CoA	3.24
1.1.1.37	TCA-cycle_1.1.1.37_MALATE-DEH-RXN	1 (S)-malate + 1 NAD+ <=> 1 H+ + 1 oxaloacetate + 1 NADH	3.24
1.1.1.39	~no-pathway_1.1.1.39_1.1.1.39-RXN	1 NAD+ + 1 (S)-malate --> 1 NADH + 1 pyruvate + 1 CO2	2.37
1.1.1.40	gluconeogenesis_C4-photosynthetic-carbon-assimilation-cycle_1.1.1.39_1.1.1.40_MALIC-NADP-RXN	1 (S)-malate + 1 NADP+ --> 1 pyruvate + 1 NADPH + 1 CO2	1.81
1.1.1.42	reductive-TCA-cycle_1.1.1.42_ISOCITDEH-RXN	1 D-threo-isocitrate + 1 NADP+ --> 1 CO2 + 1 NADPH + 1 2-oxoglutarate	3.24
1.1.1.49	~multiple-pathways_1.1.1.49_GLU6PDEHYDROG-RXN	1 beta-D-glucose-6-phosphate + 1 NADP+ <=> 1 6-phospho-D-glucono-1,5-lactone + 1 NADPH + 1 H+	4.19
1.1.1.60	acrylate-degradation_beta-alanine-biosynthesis_1.1.1.59_3-HYDROXYPROPIONATE-DEHYDROGENASE-RXN	1 3-hydroxypropionate + 1 NAD+ --> 1 H+ + 1 malonate_semialdehyde + 1 NADH	0.73
1.1.1.85	leucine-biosynthesis_1.1.1.85_3-ISOPROPYLMALDEHYDROG-RXN	1 (2R,3S)-3-isopropylmalate + 1 NAD+ <=> 1 H+ + 1 NADH + 1 (2S)-2-isopropyl-3-oxosuccinate	3.24
1.1.1.85 or spontaneous	leucine-biosynthesis_1.1.1.85_RXN-7800	1 (2S)-2-isopropyl-3-oxosuccinate + 1 H+ --> 1 CO2 + 1 4-methyl-2-oxopentanoate	-
1.1.1.86	isoleucine-biosynthesis-from-threonine_isoleucine-biosynthesis_1.1.1.86_ACETOOHBUTREDUCTOISOM-RXN	1 NADP+ + 1 2,3-dihydroxy-3-methylvalerate <=> 1 H+ + 1 NADPH + 1 2-aceto-2-hydroxy-butanoate	4.19
1.1.1.86	valine-biosynthesis_1.1.1.86_ACETOLACTREDUCTOISOM-RXN	1 NADP+ + 1 (R)-2,3-dihydroxy-3-methylbutanoate <=> 1 NADPH + 1 H+ + 1 (S)-2-acetolactate	4.19
1.1.1.94	CDP-diacylglycerol-biosynthesis_1.1.1.94_GLYC3PDEHYDROGBIOSYN-RXN_NAD	1 NAD+ + 1 sn-glycerol_3-phosphate <-- 1 dihydroxyacetone_phosphate + 1 NADH + 1 H+	3.24	swi: adapted
1.1.1.95	serine-biosynthesis_1.1.1.95_PGLYCDEHYDROG-RXN	1 3-phospho-D-glycerate + 1 NAD+ <=> 1 H+ + 1 NADH + 1 3-phospho-hydroxypyruvate	3.24
1.1.5.3	glycerol-degradation_glycerophosphodiester-degradation_1.1.5.3_RXN0-5258	1 sn-glycerol_3-phosphate + 1 ubiquinone-10 <=> 1 ubiquinol-10 + 1 dihydroxyacetone_phosphate	3.24	swi: adapted; irreversible
1.11.1.21	methanol-oxidation-to-formaldehyde_superoxide-radicals-degradation_1.11.1.21_CATAL-RXN	2 hydrogen_peroxide --> 1 oxygen + 2 H2O	2.57
1.13.11.11	~metabolism-of-tryptophan-degradation_1.13.11.11_RXN-8665	1 oxygen + 2 H+ + 1 L-tryptophan --> 1 N-formylkynurenine	3.24
1.13.11.27	~multiple-pathways_1.13.11.27_4-HYDROXYPHENYLPYRUVATE-DIOXYGENASE-RXN	1 oxygen + 1 4-hydroxyphenylpyruvate --> 1 homogentisate + 1 CO2	3.15
1.13.11.27	phenylalanine-degra_1.13.11.27_4-HYDROXYPHENYLPYRUVATE-DIOXYGENASE-RXN	1 2-oxo-3-phenylpropanoate + 1 oxygen --> 1 2-hydroxyphenylacetate + 1 CO2	3.15	swi: adapted
1.13.11.5	tyrosine-degradation-I_1.13.11.5_HOMOGENTISATE-12-DIOXYGENASE-RXN	1 homogentisate + 1 oxygen --> 1 4-maleyl-acetoacetate + 1 H+	2.57
1.13.12.1	arginine-degradation-X-(arginine-monooxygenase-pathway)_1.13.12.1_ARGININE-2-MONOOXYGENASE-RXN	1 L-arginine + 1 oxygen --> 1 H2O + 1 4-guanidinobutyramide + 1 CO2	0
1.14.-.-	ubiquinol-10-biosynthesis_1.14.-.-_RXN-9236	1 oxygen + 1 NADPH + H+ + 1 6-methoxy-3-methyl-2-all-trans-decaprenyl-1,4-benzoquinol --> 1 3-demethylubiquinol-10 + 1 H2O + 1 NADP+	2.21	swi: adapted; NADP(H)
1.14.12.17	~no-pathway_1.14.12.17_R621-RXN_NAD	1 NADH + 2 nitric_oxide + 2 oxygen --> 1 NAD+ + 2 nitrate + 1 H+	1.59
1.14.12.17	~no-pathway_1.14.12.17_R621-RXN_NADP	2 nitric_oxide + 2 oxygen + 1 NADPH --> 2 nitrate + 1 NADP+ + 1 H+	1.59
1.14.13.-	ubiquinol-10-biosynthesis-(prokaryotic)_1.14.13.-_RXN-9232	1 oxygen + 1 NADPH + 1 H+ + 1 2-decaprenylphenol --> 1 NADP+ + 1 3-(all-trans-decaprenyl)benzene-1,2-diol + 1 H2O	1.72
1.14.13.-	ubiquinol-10-biosynthesis_1.14.13.-_RXN-9234	1 NADPH + 1 2-methoxy-6-(all-trans-decaprenyl)phenol + 1 H+ + 1 oxygen --> 1 H2O + 1 NADP+ + 1 2-methoxy-6-all_trans-decaprenyl-2-methoxy-1,4-benzoquinol	1.72
1.14.13.149	phenylacetate-degradation-I-(aerobic)_1.14.13.149_RXN0-2042	1 phenylacetyl-CoA + 1 H+ + 1 oxygen + 1 NADPH --> 1 H2O + 1 2-(1,2-epoxy-1,2-dihydrophenyl)acetyl-CoA + 1 NADP+	0.64
1.14.13.40	anthranilate-degradation-II-(aerobic)_1.14.13.40_ANTHRANILOYL-COA-MONOOXYGENASE-RXN_NAD	2 NADH + 2 H+ + 1 oxygen + 1 2-aminobenzoyl-CoA --> 1 2-amino-5-oxocyclohex-1-enecarboxyl-CoA + 1 H2O + 2 NAD+	0.87
1.14.13.40	anthranilate-degradation-II-(aerobic)_1.14.13.40_ANTHRANILOYL-COA-MONOOXYGENASE-RXN_NADP	2 H+ + 2 NADPH + 1 oxygen + 1 2-aminobenzoyl-CoA --> 1 2-amino-5-oxocyclohex-1-enecarboxyl-CoA + 2 NADP+ + 1 H2O	0.87
1.17.1.4	~multiple-pathways_1.17.1.4_RXN0-901	1 NAD+ + 1 H2O + 1 xanthine <=> 1 H+ + 1 urate + 1 NADH	1.68
1.17.1.4	~multiple-pathways_1.17.1.4_RXN-7682	1 hypoxanthine + 1 NAD+ + 1 H2O --> 1 NADH + 1 H+ + 1 xanthine	1.68
1.17.1.4	methylerythritol-phosphate-pathway_1.17.1.2_ISPH2-RXN_NAD	1 NAD+ + 1 H2O + 1 isopentenyl_diphosphate <-- 1 H+ + 1 1-hydroxy-2-methyl-2-(E)-butenyl_4-diphosphate + 1 NADH	1.68
1.17.1.4	methylerythritol-phosphate-pathway_1.17.1.2_ISPH2-RXN_NADP	1 H2O + 1 isopentenyl_diphosphate + 1 NADP+ <-- 1 H+ + 1 1-hydroxy-2-methyl-2-(E)-butenyl_4-diphosphate + 1 NADPH	1.68
1.17.1.4	methylerythritol-phosphate-pathway_1.17.1.2_RXN0-884_NAD	1 H2O + 1 NAD+ + 1 dimethylallyl_diphosphate <-- 1 NADH + 1 H+ + 1 1-hydroxy-2-methyl-2-(E)-butenyl_4-diphosphate	1.68
1.17.1.4	methylerythritol-phosphate-pathway_1.17.1.2_RXN0-884_NADP	1 NADP+ + 1 H2O + 1 dimethylallyl_diphosphate <-- 1 H+ + 1 1-hydroxy-2-methyl-2-(E)-butenyl_4-diphosphate + 1 NADPH	1.68
1.17.1.8	~no-pathway_1.17.1.8_RXN-14014	1 NADP+ + 1 H2O + 1 (S)-2,3,4,5-tetrahydrodipicolinate <-- 1 H+ + 1 (2S,4S)-4-hydroxy-2,3,4,5-tetrahydrodipicolinate + 1 NADPH	3.24	swi: irreversible
1.17.1.9	~multiple-pathways_1.2.1.2_1.2.1.2-RXN	1 formate + 1 NAD+ --> 1 NADH + 1 CO2	1.72
1.17.4.1	~no-pathway_1.17.4.1_ADPREDUCT-RXN	1 dADP + 1 H2O + 1 |Ox-Thioredoxin| <-- 1 |Red-Thioredoxin| + 1 ADP	2.48
1.17.4.1	~no-pathway_1.17.4.1_GDPREDUCT-RXN	1 H2O + 1 dGDP + 1 |Ox-Thioredoxin| <-- 1 |Red-Thioredoxin| + 1 GDP	2.48
1.17.4.1	de-novo-biosynthesis-of-pyrimidine-deoxyribonucleotides_1.17.4.1_CDPREDUCT-RXN	1 H2O + 1 dCDP + 1 |Ox-Thioredoxin| <-- 1 |Red-Thioredoxin| + 1 CDP	2.48
1.17.4.1	de-novo-biosynthesis-of-pyrimidine-deoxyribonucleotides_1.17.4.1_UDPREDUCT-RXN	1 H2O + 1 dUDP + 1 |Ox-Thioredoxin| <-- 1 UDP + 1 |Red-Thioredoxin|	2.48
1.17.7.1	methylerythritol-phosphate-pathway_1.17.7.1_RXN0-882	1 1-hydroxy-2-methyl-2-(E)-butenyl_4-diphosphate + 2 |Oxidized-flavodoxins| + 1 H2O <-- 1 H+ + 1 2-C-methyl-D-erythritol-2,4-cyclodiphosphate + 2 |Reduced-flavodoxins|	1.54	swi: adapted; flavodoxin
1.18.1.2	~no-pathway_1.18.1.2_FLAVONADPREDUCT-RXN	1 H+ + 1 NADPH + 1 |Oxidized-flavodoxins| <=> 1 |Reduced-flavodoxins| + 1 NADP+	0.85
1.18.1.2	ubiquinol-6-biosynthesis-from-4-aminobenzoate_1.18.1.2_1.18.1.2-RXN	1 NADP+ + 2 |Reduced-ferredoxins| + 1 H+ --> 1 NADPH + 2 |Oxidized-ferredoxins|	0.85
1.2.1.-	lysine-degra_1.2.1.-_RXN	1 5-aminopentanal + 1 NAD+ + 1 H2O --> 1 5-aminopentanoate + 1 NADH + 1 H+	2.28	swi: manual; Drüppel et al. 2014a
1.2.1.-	lysine-degradation_1.2.1.-_RXN-8162	1 (S)-2,3,4,5-tetrahydropiperidine-2-carboxylate + 1 NAD+ + 2 H2O --> 1 H+ + 1 L-2-aminoadipate + 1 NADH	2.28
1.2.1.-	lysine-degradation_1.2.1.-_RXN-8182	1 glutarate_semialdehyde + 1 H2O + 1 NADP+ --> 1 glutarate + 1 NADPH + 2 H+	2.28
1.2.1.11	~metabolism-of-biosynthesis_1.2.1.11_ASPARTATE-SEMIALDEHYDE-DEHYDROGENASE-RXN	1 phosphate + 1 NADP+ + 1 L-aspartate-semialdehyde <=> 1 NADPH + 1 L-aspartyl-4-phosphate + 1 H+	4.19
1.2.1.12	~no-pathway_1.2.1.12_GAPDHSYNEC-RXN_NAD	1 NAD+ + 1 D-glyceraldehyde-3-phosphate + 1 phosphate <=> 1 1,3-bisphospho-D-glycerate + 1 NADH + 1 H+	1.81
1.2.1.16	4-aminobutyrate-degradation-III_1.2.1.16_RXN0-5293_NAD	1 H2O + 1 succinate_semialdehyde + 1 NAD+ --> 1 succinate + 1 NADH + 2 H+	3.24
1.2.1.16	4-aminobutyrate-degradation-III_1.2.1.16_RXN0-5293_NADP	1 succinate_semialdehyde + 1 H2O + 1 NADP+ --> 1 NADPH + 1 succinate + 2 H+	3.24
1.2.1.18	~no-pathway_1.2.1.18_1.2.1.18-RXN	1 coenzyme_A + 1 malonate_semialdehyde + 1 NADP+ --> 1 NADPH + 1 CO2 + 1 acetyl-CoA	1.81	swi:irreversible
1.2.1.18	myo-inositol-degradation_beta-alanine-degradation_1.2.1.18_RXN-2902	1 coenzyme_A + 1 NAD+ + 1 malonate_semialdehyde --> 1 CO2 + 1 NADH + 1 acetyl-CoA	1.81
1.2.1.21	D-arabinose-degradation_ethylene-glycol-degradation_1.2.1.21_GLYCOLALD-DEHYDROG-RXN	1 H2O + 1 glycolaldehyde + 1 NAD+ --> 1 glycolate + 2 H+ + 1 NADH	0
1.2.1.27	2,4-dinitrotoluene-degradation_1.2.1.27_1.2.1.27-RXN	1 (S)-methylmalonate-semialdehyde + 1 coenzyme_A + 1 NAD+ + 1 H2O --> 1 bicarbonate + 1 NADH + 1 propanoyl-CoA + 1 H+	3.24
1.2.1.3	oxidative-ethanol-degradation_1.2.1.3_RXN66-3	1 H2O + 1 NAD+ + 1 acetaldehyde --> 1 NADH + 2 H+ + 1 acetate	0.94
1.2.1.38	ornithine-biosynthesis_arginine-biosynthesis_1.2.1.38_N-ACETYLGLUTPREDUCT-RXN	1 NADP+ + 1 N-acetyl-L-glutamate_5-semialdehyde + 1 phosphate <=> 1 H+ + 1 N-acetylglutamyl-phosphate + 1 NADPH	3.24
1.2.1.41	proline-biosynthesis_citrulline-biosynthesis_1.2.1.41_GLUTSEMIALDEHYDROG-RXN	1 NADP+ + 1 L-glutamate_gamma-semialdehyde + 1 phosphate <-- 1 NADPH + 1 L-glutamate-5-phosphate + 1 H+	3.24
1.2.1.59	Calvin-Benson-Bassham-cycle_1.2.1.59_1.2.1.13-RXN	1 NADP+ + 1 D-glyceraldehyde-3-phosphate + 1 phosphate <-- 1 NADPH + 1 H+ + 1 1,3-bisphospho-D-glycerate	2.28
1.2.1.88	~multiple-pathways_1.2.1.88_RXN-14116	1 L-glutamate-5-semialdehyde + 1 NAD+ + 1 H2O <=> 1 NADH + 1 L-glutamate + 2 H+	2.57
1.2.1.91	phenylacetate-degradation-I-(aerobic)_1.17.1.7_RXNMETA-12672	1 H2O + 1 3-oxo-5,6-dehydrosuberyl-CoA_semialdehyde + 1 NADP+ --> 1 NADPH + 2 H+ + 1 3-oxo-5,6-didehydrosuberyl-CoA	1.72
1.2.4.1	2-oxobutanoate-degradation_PDH-RXN	1 2-oxobutanoate + 1 NAD+ + 1 coenzyme_A --> 1 propanoyl-CoA + 1 NADH + 1 CO2	0.85	swi: manual; Drüppel et al. 2014a
1.2.4.1	acetyl-CoA-biosynthesis-(from-pyruvate)_1.2.4.1_RXN0-1134	1 lipoamide + 1 pyruvate + 1 H+ --> 1 S-acetyldihydrolipoamide + 1 CO2	0.85
1.2.4.2	2-ketoglutarate-dehydrogenase-complex_1.2.4.2_2OXOGLUTDECARB-RXN	1 2-oxoglutarate + 1 lipoamide + 2 H+ --> 1 |Oxo-glutarate-dehydro-suc-DH-lipoyl| + 1 CO2	3.24
1.2.4.4	lysine-degra_1.2.4.4._RXN	1 2-oxoadipate + 1 NAD+ + 1 coenzyme_A --> 1 glutaryl-CoA + 1 NADH + 1 H+ + 1 CO2	1.6	swi: manual; Drüppel et al. 2014a
1.2.7.8	isoleucine-degra_1.2.7.8-RXN	1 (S)-3-methyl-2-oxopentanoate + 1 coenzyme_A + 1 |Oxidized-ferredoxins| --> 1 |Reduced-ferredoxins| + 1 2-methylbutanoyl-CoA + 1 CO2	1.51	swi: adapted
1.2.7.8	leucine-degra_1.2.7.8-RXN	1 4-methyl-2-oxopentanoate + 1 coenzyme_A + 1 |Oxidized-ferredoxins| --> 1 |Reduced-ferredoxins| + 1 isovaleryl-CoA + 1 CO2	1.51	swi: adapted
1.2.7.8	phenylalanine_degra_1.2.7.8_-RXN	1 |Oxidized-ferredoxins| + 1 2-oxo-3-phenylpropanoate + 1 coenzyme_A --> 1 phenylacetyl-CoA + 1 CO2 + 1 |Reduced-ferredoxins|	1.51	swi: adapted
1.2.7.8	valine-degra_1.2.7.8_1.2.7.8-RXN	1 coenzyme_A + 1 3-methyl-2-oxobutanoate + 1 |Oxidized-ferredoxins| --> 1 isobutanoyl-CoA + 1 CO2 + 1 |Reduced-ferredoxins|	1.51	swi: adapted
1.3.1.12	tyrosine-biosynthesis-I_1.3.1.12_PREPHENATEDEHYDROG-RXN	1 NAD+ + 1 prephenate --> 1 NADH + 1 4-hydroxyphenylpyruvate + 1 CO2	3.08
1.3.1.2	uracil-degradation-I-(reductive)_1.3.1.2_1.3.1.2-RXN	1 NADP+ + 1 5,6-dihydrouracil <=> 1 H+ + 1 uracil + 1 NADPH	0.73
1.3.1.85	ethylmalonyl-pathway_1.3.1.85_RXN-8957	1 NADP+ + 1 (2S)-ethylmalonyl-CoA <=> 1 NADPH + 1 crotonyl-CoA + 1 CO2	1.81	swi: reversible
1.3.1.9	cis-dodecenoyl-biosynthesis_1.3.1.9_RXN0-2145	1 cis-D5-dodecenoyl-[ACP] + 1 NAD+ <-- 1 H+ + 1 trans-D3-cis-D5-dodecenoyl-[ACP] + 1 NADH	3.24	swi: adapted
1.3.1.9	cis-vaccenate-biosynthesis_1.3.1.9_RXN-9558	1 NADH + 1 H+ + 1 cis-vaccen-2-enoyl-[ACP] --> 1 NAD+ + 1 cis-vaccenoyl-[ACP]	3.24	swi: adapted
1.3.1.9	palmitate-biosynthesis-II-(bacteria-and-plants)_1.3.1.9_RXN-9657	1 NAD+ + 1 Butanoyl-[ACP] <-- 1 trans-D2-butenoyl-[ACP] + 1 H+ + 1 NADH	3.24	swi: adapted
1.3.1.9	palmitate-biosynthesis-II-(bacteria-and-plants)_1.3.1.9_RXN-9658	1 NAD+ + 1 Hexanoyl-[ACP] <-- 1 H+ + 1 trans-D2-hexenoyl-[ACP] + 1 NADH	3.24	swi: adapted
1.3.1.9	palmitate-biosynthesis-II-(bacteria-and-plants)_1.3.1.9_RXN-9659	1 NAD+ + 1 Octanoyl-[ACP] <-- 1 trans-D2-octenoyl-[ACP] + 1 NADH + 1 H+	3.24	swi: adapted
1.3.1.9	palmitate-biosynthesis-II-(bacteria-and-plants)_1.3.1.9_RXN-9660	1 NAD+ + 1 Decanoyl-[ACP] <-- 1 H+ + 1 NADH + 1 trans-D2-decenoyl-[ACP]	3.24	swi: adapted
1.3.1.9	palmitate-biosynthesis-II-(bacteria-and-plants)_1.3.1.9_RXN-9661	1 NAD+ + 1 Dodecanoyl-[ACP] <-- 1 H+ + 1 trans-D2-dodecenoyl-[ACP] + 1 NADH	3.24	swi: adapted
1.3.1.9	palmitate-biosynthesis-II-(bacteria-and-plants)_1.3.1.9_RXN-9662	1 NAD+ + 1 Tetradecanoyl-[ACP] <-- 1 H+ + 1 trans-D2-tetradecenoyl-[ACP] + 1 NADH	3.24	swi: adapted
1.3.1.9	palmitate-biosynthesis-II-(bacteria-and-plants)_1.3.1.9_RXN-9663	1 NAD+ + 1 Hexadecanoyl-[ACP] <-- 1 H+ + 1 trans-D2-hexadecenoyl-[ACP] + 1 NADH	3.24	swi: adapted
1.3.1.9	palmitoleate-biosynthesis-I_1.3.1.9_RXN-10657	1 cis-D7-tetradecenoyl-[ACP] + 1 NAD+ <-- 1 trans-D3-cis-D7-tetradecenoyl-[ACP] + 1 H+ + 1 NADH	3.24	swi: adapted
1.3.1.9	palmitoleate-biosynthesis-I_1.3.1.9_RXN-10661	1 Palmitoleoyl-[ACP] + 1 NAD+ <-- 1 H+ + 1 trans-D3-cis-D9-hexadecenoyl-[ACP] + 1 NADH	3.24	swi: adapted
1.3.1.9	stearate-biosynthesis-II-(bacteria-and-plants)_1.3.1.9_RXN-9635	1 NAD+ + 1 Octadecanoyl-[ACP] <-- 1 H+ + 1 trans-D2-octadecenoyl-[ACP] + 1 NADH	3.24	swi: adapted
1.3.1.98	UDP-N-acetylmuramoyl-pentapeptide-biosynthesis_1.3.1.98_UDPNACETYLMURAMATEDEHYDROG-RXN	1 NADP+ + 1 UDP-N-alpha-D-acetylmuramate <-- 1 H+ + 1 NADPH + 1 UDP-N-acetyl-alpha-D-glucosamine-enolpyruvate	3.24
1.3.5.1	~no-pathway_1.3.99.1_RXN-14119	1 H+ + 1 succinate + 1 FAD <=> 1 fumarate + 1 FADH2	3.24
1.3.5.2	de-novo-biosynthesis-of-uridine-5'-monophosphate_1.3.5.2_RXN0-6491	1 ubiquinone-10 + 1 (S)-dihydroorotate --> 1 ubiquinol-10 + 1 orotate	2.57
1.3.8.-	beta-alanine-biosynthesis-II_1.3.8.-_PROPCOASYN-RXN	1 FAD + 1 propanoyl-CoA --> 1 FADH2 + 1 acryloyl-CoA	0.64
1.3.8.-	valine-degra_1.3.8.4_RXN-14264	1 isobutanoyl-CoA + 1 FAD + 1 H+ <=> 1 FADH2 + 1 methylacrylyl-CoA	0.64	swi: adapted
1.3.8.1	~no-pathway_1.3.8.1_RXN-14193	1 butanoyl-CoA + 1 H+ + 1 FAD <=> 1 FADH2 + 1 crotonyl-CoA	0.78
1.3.8.4	~no-pathway_1.3.8.4_RXN-14264	1 isovaleryl-CoA + 1 FAD + 1 H+ <=> 1 3-methylcrotonyl-CoA + 1 FADH2	0.78
1.3.8.4	isoleucine-degra_1.3.8.4_RXN-14264	1 FAD + 1 H+ + 1 2-methylbutanoyl-CoA <=> 1 (E)-2-methylcrotonoyl-CoA + 1 FADH2	0.78	swi: adapted
1.3.8.6	~no-pathway_1.3.8.6_RXN-14211	2 H+ + 1 glutaryl-CoA + 1 FAD --> 1 crotonyl-CoA + 1 CO2 + 1 FADH2	1.81
1.4.1.1	alanine-degradation-IV_1.4.1.1_ALANINE-DEHYDROGENASE-RXN	1 H2O + 1 L-alanine + 1 NAD+ <=> 1 H+ + 1 NADH + 1 ammonium + 1 pyruvate	5.19
1.4.1.13	glutamate-biosynthesis_glutamine-degradation_1.4.1.13_GLUTAMATESYN-RXN	1 NADP+ + 2 L-glutamate <-- 1 H+ + 1 2-oxoglutarate + 1 NADPH + 1 L-glutamine	4.19
1.4.1.3	~multiple-pathways_1.4.1.3_GLUTAMATE-DEHYDROGENASE-NADP+-RXN_NAD	1 L-glutamate + 1 H2O + 1 NAD+ <=> 1 2-oxoglutarate + 1 NADH + 2 H+ + 1 ammonia	2.48
1.4.1.3	~multiple-pathways_1.4.1.3_GLUTAMATE-DEHYDROGENASE-NADP+-RXN_NADP	1 L-glutamate + 1 H2O + 1 NADP+ <=> 1 ammonia + 1 NADPH + 1 2-oxoglutarate + 2 H+	2.48
1.4.1.9	~no-pathway_1.4.1.9_ILEDEAMINE-RXN	1 H2O + 1 NAD+ + 1 L-isoleucine --> 1 H+ + 1 (S)-3-methyl-2-oxopentanoate + 1 ammonium + 1 NADH	3.15
1.4.1.9	~no-pathway_1.4.1.9_LEUCINE-DEHYDROGENASE-RXN	1 NAD+ + 1 H2O + 1 L-leucine <=> 1 NADH + 1 ammonium + 1 H+ + 1 4-methyl-2-oxopentanoate	3.15
1.4.1.9	~no-pathway_1.4.1.9_RXN-13184	1 NAD+ + 1 L-valine + 1 H2O <=> 1 ammonium + 1 3-methyl-2-oxobutanoate + 1 H+ + 1 NADH	3.15
1.4.3.16	NAD-biosynthesis-I-(from-aspartate)_1.4.3.16_L-ASPARTATE-OXID-RXN	1 L-aspartate + 1 oxygen --> 1 H+ + 1 hydrogen_peroxide + 1 alpha-iminosuccinate	3.24
1.4.4.2	~multiple-pathways_1.8.1.4_1.4.4.2_2.1.2.10_GCVMULTI-RXN	1 tetrahydrofolate + 1 NAD+ + 1 glycine --> 1 ammonium + 1 NADH + 1 5,10-methylenetetrahydrofolate + 1 CO2	3.24
1.5.1.-	lysine-degradation-X_1.5.1.-_RXN-10854	1 1-piperideine + 1 NAD+ + 2 H2O --> 1 NADH + 1 H+ + 1 5-aminopentanoate	0.78
1.5.1.2	proline-biosynthesis_arginine-degradation_1.5.1.2_PYRROLINECARBREDUCT-RXN_NAD	1 NAD+ + 1 L-proline <-- 1 (S)-1-pyrroline-5-carboxylate + 1 NADH + 2 H+	3.08
1.5.1.2	proline-biosynthesis_arginine-degradation_1.5.1.2_PYRROLINECARBREDUCT-RXN_NADP	1 NADP+ + 1 L-proline <-- 2 H+ + 1 NADPH + 1 (S)-1-pyrroline-5-carboxylate	3.08
1.5.1.20	formylTHF-biosynthesis_folate-transformations_1.5.1.20_1.5.1.20-RXN	1 5-methyl-tetrahydrofolate + 1 NAD+ <=> 1 NADH + 1 5,10-methylenetetrahydrofolate + 1 H+	1.65
1.5.1.3	formylTHF-biosynthesis_1.5.1.3_DIHYDROFOLATEREDUCT-RXN	1 tetrahydrofolate + 1 NADP+ <-- 1 NADPH + 1 H+ + 1 7,8-dihydrofolate	3.03
1.5.1.38	5,6-dimethylbenzimidazole-biosynthesis_1.5.1.38_FMNREDUCT-RXN_NADP	1 FMNH2 + 1 NADP+ <-- 1 FMN + 1 NADPH + 2 H+	0	swi: irreversible
1.5.1.5	~multiple-pathways_1.5.1.5_METHYLENETHFDEHYDROG-NADP-RXN	1 5,10-methylenetetrahydrofolate + 1 NADP+ <=> 1 NADPH + 1 5,10-methenyltetrahydrofolate	3.24
1.5.3.7	lysine-degradation-V_1.5.3.7_L-PIPECOLATE-OXIDASE-RXN	1 L-pipecolate + 1 oxygen --> 1 hydrogen_peroxide + 1 H+ + 1 (S)-2,3,4,5-tetrahydropiperidine-2-carboxylate	0	based on metabolome data
1.5.5.1	~no-pathway_1.5.5.1_1.5.5.1-RXN	1 FADH2 + 1 ubiquinone-10 <=> 1 ubiquinol-10 + 1 FAD	3.24	swi: adapted
1.5.5.2	~multiple-pathways_1.5.99.8_RXN-821	1 L-proline + 1 ubiquinone-10 --> 1 (S)-1-pyrroline-5-carboxylate + 1 H+ + 1 ubiquinol-10	2.57
1.6.1.2	NAD_NADP-1.6.1.2-RXN	1 NAD+ + 1 NADPH + 1 H+ <-- 1 NADH + 1 NADP+ + 1 H+_ex	1.54	swi: manual; membrane-bound; Drüppel et al. 2014B; irreversible
1.6.5.11	~no-pathway_1.6.99.5_NADH-DEHYDROGENASE-RXN	1 NADH + 1 H+ + 1 ubiquinone-10 <=> 1 ubiquinol-10 + 1 NAD+	0.67	swi: adapted; Ubiquinols
1.7.2.1	~multiple-pathways_1.7.2.1_NITRITE-REDUCTASE-CYTOCHROME-RXN	1 nitric_oxide + 1 H2O + 1 |Cytochromes-C-Oxidized| <=> 1 |Cytochromes-C-Reduced| + 1 nitrite + 2 H+	3.24
1.7.2.5	nitrate-reduction_nitrifier-denitrification_1.7.2.5_NITRIC-OXIDE-REDUCTASE-RXN	1 nitrous_oxide + 2 |Cytochromes-C-Oxidized| + 1 H2O <=> 2 |Cytochromes-C-Reduced| + 2 H+ + 2 nitric_oxide	3.24
1.8.1.2	sulfate-reduction-I-(assimilatory)_1.8.1.2_SULFITE-REDUCT-RXN	3 NADP+ + 3 H2O + 1 hydrogen_sulfide <=> 5 H+ + 3 NADPH + 1 sulfite	0.87
1.8.1.4	glycine-cleavage-complex_1.8.1.4_RXN-8629	1 NAD+ + 1 dihydrolipoamide --> 1 NADH + 1 lipoamide + 1 H+	3.24
1.8.1.9	thioredoxin-pathway_1.8.1.9_THIOREDOXIN-REDUCT-NADPH-RXN	1 |Red-Thioredoxin| + 1 NADP+ <-- 1 |Ox-Thioredoxin| + 1 H+ + 1 NADPH	0.64
1.8.4.8	sulfate-reduction-I-(assimilatory)_1.8.4.8_1.8.4.8-RXN	1 |Ox-Thioredoxin| + 2 H+ + 1 adenosine_3',5'-bisphosphate + 1 sulfite <=> 1 |Red-Thioredoxin| + 1 phosphoadenosine-5'-phosphosulfate	2.41
1.9.3.1	aerobic-respiration----electron-donor-II_1.9.3.1_CYTOCHROME-C-OXIDASE-RXN	1 oxygen + 4 |Cytochromes-C-Reduced| + 4 H+ --> 2 H2O + 4 |Cytochromes-C-Oxidized| + 4 H+_rc	3.15	swi: adapted
2.1.1.13	~multiple-pathways_2.1.1.13_HOMOCYSMETB12-RXN	1 5-methyl-tetrahydrofolate + 1 L-homocysteine --> 1 tetrahydrofolate + 1 L-methionine	1.6
2.1.1.14	S-adenosyl-L-methionine-cycle_methionine-biosynthesis_2.1.1.14_HOMOCYSMET-RXN	1 5-methyltetrahydropteroyltri-L-glutamate + 1 L-homocysteine <=> 1 L-methionine + 1 tetrahydropteroyl_tri-L-glutamate	1.51
2.1.1.17	phosphatidylcholine-biosynthesis-V_2.1.1.17_2.1.1.17-RXN	1 L-1-phosphatidylethanolamine + 1 S-adenosyl-L-methionine --> 1 phosphatidyl-N-methylethanolamine + 1 S-adenosyl-L-homocysteine + 1 H+	3.08	swi: adapted
2.1.1.201	ubiquinol-10-biosynthesis_2.1.1.201_RXN-9235	1 2-methoxy-6-all_trans-decaprenyl-2-methoxy-1,4-benzoquinol + 1 S-adenosyl-L-methionine --> 1 H+ + 1 6-methoxy-3-methyl-2-all-trans-decaprenyl-1,4-benzoquinol + 1 S-adenosyl-L-homocysteine	0.64
2.1.1.222	ubiquinol-10-biosynthesis-(prokaryotic)_2.1.1.222_RXN-9233	1 S-adenosyl-L-methionine + 1 3-(all-trans-decaprenyl)benzene-1,2-diol --> 1 2-methoxy-6-(all-trans-decaprenyl)phenol + 1 H+ + 1 S-adenosyl-L-homocysteine	2.57
2.1.1.45	~multiple-pathways_2.1.1.45_THYMIDYLATESYN-RXN	1 dUMP + 1 5,10-methylenetetrahydrofolate --> 1 dTMP + 1 7,8-dihydrofolate	4.19
2.1.1.64	ubiquinol-10-biosynthesis_2.1.1.64_RXN-9237	1 S-adenosyl-L-methionine + 1 3-demethylubiquinol-10 --> 1 ubiquinol-10 + 1 H+ + 1 S-adenosyl-L-homocysteine	3.24
2.1.1.71	phosphatidylcholine-biosynthesis_2.1.1.17_2.1.1.71_RXN4FS-2	1 phosphatidyl-N-dimethylethanolamine + 1 S-adenosyl-L-methionine --> 1 phosphatidylcholine + 1 H+ + 1 S-adenosyl-L-homocysteine	0.87
2.1.1.71	phosphatidylcholine-biosynthesis_2.1.1.71_2.1.1.71-RXN	1 phosphatidyl-N-methylethanolamine + 1 S-adenosyl-L-methionine --> 1 H+ + 1 phosphatidyl-N-dimethylethanolamine + 1 S-adenosyl-L-homocysteine	0.87
2.1.2.1	~multiple-pathways_2.1.2.1_GLYOHMETRANS-RXN	1 L-serine + 1 tetrahydrofolate <=> 1 H2O + 1 5,10-methylenetetrahydrofolate + 1 glycine	1.65
2.1.2.11	phosphopantothenate-biosynthesis_2.1.2.11_3-CH3-2-OXOBUTANOATE-OH-CH3-XFER-RXN	1 2-oxoisovalerate + 1 5,10-methylenetetrahydrofolate + 1 H2O <=> 1 2-dehydropantoate + 1 tetrahydrofolate	3.24
2.1.2.2	~no-pathway_2.1.2.2_GART-RXN	1 5-phospho-ribosyl-glycineamide + 1 10-formyl-tetrahydrofolate <=> 1 H+ + 1 tetrahydrofolate + 1 5'-phosphoribosyl-N-formylglycineamide	3.03
2.1.2.3	~no-pathway_2.1.2.3_AICARTRANSFORM-RXN	1 10-formyl-tetrahydrofolate + 1 aminoimidazole_carboxamide_ribonucleotide <=> 1 phosphoribosyl-formamido-carboxamide + 1 tetrahydrofolate	3.24
2.1.3.2	de-novo-biosynthesis-of-uridine-5'-monophosphate_2.1.3.2_ASPCARBTRANS-RXN	1 carbamoyl-phosphate + 1 L-aspartate <=> 1 H+ + 1 N-carbamoyl-L-aspartate + 1 phosphate	4.19
2.1.3.3	~multiple-pathways_2.1.3.3_ORNCARBAMTRANSFER-RXN	1 carbamoyl-phosphate + 1 L-ornithine <=> 1 H+ + 1 L-citrulline + 1 phosphate	0.64
2.2.1.1	~multiple-pathways_2.2.1.1_1TRANSKETO-RXN	1 D-sedoheptulose-7-phosphate + 1 D-glyceraldehyde-3-phosphate <=> 1 D-xylulose-5-phosphate + 1 D-ribose-5-phosphate	3.24
2.2.1.1	~multiple-pathways_2.2.1.1_2TRANSKETO-RXN	1 D-xylulose-5-phosphate + 1 D-erythrose-4-phosphate <=> 1 D-glyceraldehyde-3-phosphate + 1 D-fructose-6-phosphate	3.24
2.2.1.2	~multiple-pathways_2.2.1.2_TRANSALDOL-RXN	1 D-sedoheptulose-7-phosphate + 1 D-glyceraldehyde-3-phosphate <=> 1 D-fructose-6-phosphate + 1 D-erythrose-4-phosphate	4.19
2.2.1.6	isoleucine-biosynthesis-from-threonine_isoleucine-biosynthesis_2.2.1.6_ACETOOHBUTSYN-RXN	1 H+ + 1 2-oxobutanoate + 1 pyruvate --> 1 CO2 + 1 2-aceto-2-hydroxy-butanoate	1.65
2.2.1.6	valine-biosynthesis_2.2.1.6_ACETOLACTSYN-RXN	2 pyruvate + 1 H+ --> 1 CO2 + 1 (S)-2-acetolactate	1.65
2.2.1.7	~multiple-pathways_2.2.1.7_DXS-RXN	1 pyruvate + 1 D-glyceraldehyde_3-phosphate + 1 H+ --> 1 CO2 + 1 1-deoxy-D-xylulose_5-phosphate	3.24
2.3.1.-	PHB_biosynthesis-PhaC-2.3.1.-RXN	1 (R)-3-hydroxybutanoyl-CoA --> 1 PHB + 1 coenzyme_A	0.73	swi: manual; DFL12
2.3.1.-	superpathway-of-(KDO)2-lipid-A-biosynthesis_(KDO)2-lipid-A-biosynthesis_2.3.1.-_LAUROYLACYLTRAN-RXN	1 alpha-Kdo-(2->4)-alpha-Kdo-(2->6)-lipid_IVA + 1 Dodecanoyl-[ACP] --> 1 ACP + 1 (KDO)2-(lauroyl)-lipid_IVA	0.73
2.3.1.-	superpathway-of-(KDO)2-lipid-A-biosynthesis_(KDO)2-lipid-A-biosynthesis_2.3.1.-_MYRISTOYLACYLTRAN-RXN	1 (KDO)2-(lauroyl)-lipid_IVA + 1 Tetradecanoyl-[ACP] --> 1 (KDO)2-lipid_A + 1 ACP	0.73
2.3.1.1	ornithine-biosynthesis_arginine-biosynthesis_2.3.1.1_N-ACETYLTRANSFER-RXN	1 acetyl-CoA + 1 L-glutamate --> 1 H+ + 1 coenzyme_A + 1 N-acetyl-L-glutamate	3.24
2.3.1.117	lysine-biosynthesis-I_2.3.1.117_TETHYDPICSUCC-RXN	1 (S)-2,3,4,5-tetrahydrodipicolinate + 1 succinyl-CoA + 1 H2O --> 1 coenzyme_A + 1 N-succinyl-2-amino-6-ketopimelate	3.24	swi: irreversible
2.3.1.12	~no-pathway_2.3.1.12_DIHYDLIPACETRANS-RXN	1 acetyl-CoA + 1 dihydrolipoamide <=> 1 S-acetyldihydrolipoamide + 1 coenzyme_A	0.64
2.3.1.129	lipid-IVA-biosynthesis_2.3.1.129_UDPNACETYLGLUCOSAMACYLTRANS-RXN	1 (R)-3-hydroxy-tetradecanoyl-[ACP] + 1 UDP-N-acetyl-alpha-D-glucosamine --> 1 UDP-3-O-[(3R)-3-hydroxymyristoyl]-N-acetyl-alpha-D-glucosamine + ACP	0.64	swi: adapted
2.3.1.15	CDP-diacylglycerol-biosynthesis-II_2.3.1.15_RXN-10462	1 cis-vaccenoyl-[ACP] + 1 sn-glycerol_3-phosphate --> 1 cis-vaccenoyl-sn-glycerol-3-phosphate + 1 ACP	1.6	swi: adapted
2.3.1.157	UDP-N-acetyl-D-glucosamine-biosynthesis-I_2.3.1.157_2.3.1.157-RXN	1 acetyl-CoA + 1 D-glucosamine_1-phosphate --> 1 H+ + 1 N-acetyl-alpha-D-glucosamine_1-phosphate + 1 coenzyme_A	0.64
2.3.1.174	~metabolism-of-degradation_2.3.1.174_RXN-3641	1 acetyl-CoA + 1 succinyl-CoA <-- 1 coenzyme_A + 1 3-oxoadipyl-CoA	3.32
2.3.1.174	phenylacetate-degradation-I-(aerobic)_2.3.1.223_RXN0-6512	1 acetyl-CoA + 1 2,3-didehydroadipyl-CoA <-- 1 coenzyme_A + 1 3-oxo-5,6-didehydrosuberyl-CoA	3.32	swi: 2.3.1.174
2.3.1.179	cis-vaccenate-biosynthesis_2.3.1.179_2.3.1.179-RXN	1 Palmitoleoyl-[ACP] + 1 malonyl-[ACP] + 1 H+ --> 1 3-oxo-cis-vaccenoyl-[ACP] + 1 CO2 + 1 ACP	0.85	swi: adapted
2.3.1.180	fatty-acid-biosynthesis-initiation-I_2.3.1.180_2.3.1.180-RXN	1 malonyl-[ACP] + 1 acetyl-CoA + 1 H+ --> 1 Acetoacetyl-[ACP] + 1 CO2 + 1 coenzyme_A	0.64	swi: adapted
2.3.1.191	lipid-IVA-biosynthesis_2.3.1.191_UDPHYDROXYMYRGLUCOSAMNACETYLTRANS-RXN	1 UDP-3-O-(3-hydroxymyristoyl)-alpha-D-glucosamine + 1 (R)-3-hydroxy-tetradecanoyl-[ACP] --> 1 ACP + 1 H+ + 1 UDP-2,3-bis[O-(3R)-3-hydroxymyristoyl]-alpha-D-glucosamine	1.81	swi: adapted
2.3.1.29	threonine-degradation-II_2.3.1.29_AKBLIG-RXN	1 acetyl-CoA + 1 glycine <=> 1 H+ + 1 coenzyme_A + 1 2-amino-3-oxobutanoate	3.24
2.3.1.30	cysteine-biosynthesis-I_2.3.1.30_SERINE-O-ACETTRAN-RXN	1 L-serine + 1 acetyl-CoA <=> 1 coenzyme_A + 1 O-acetyl-L-serine	4.1
2.3.1.35	arginine-biosynthesis-II-(acetyl-cycle)_2.3.1.35_GLUTAMATE-N-ACETYLTRANSFERASE-RXN	1 N-acetyl-L-ornithine + 1 L-glutamate --> 1 L-ornithine + 1 N-acetyl-L-glutamate	3.24
2.3.1.39	fatty-acid-biosynthesis-initiation_fatty-acid-biosynthesis_2.3.1.39_MALONYL-COA-ACP-TRANSACYL-RXN	1 ACP + 1 malonyl-CoA <=> 1 malonyl-[ACP] + 1 coenzyme_A # swi: adapted	0.64	swi: adapted
2.3.1.41	palmitate-biosynthesis-II-(bacteria-and-plants)_2.3.1.180_2.3.1.41_RXN-9516	1 Butanoyl-[ACP] + 1 malonyl-[ACP] + 1 H+ --> 1 CO2 + 1 ACP + 1 3-oxo-hexanoyl-[ACP]	3.24	swi: adapted
2.3.1.41	palmitate-biosynthesis-II-(bacteria-and-plants)_2.3.1.180_2.3.1.41_RXN-9523	1 Hexanoyl-[ACP] + 1 malonyl-[ACP] + 1 H+ → 1 ACP + 1 CO2 + 1 3-oxo-octanoyl-[ACP]	3.24	swi: adapted
2.3.1.41	palmitate-biosynthesis-II-(bacteria-and-plants)_2.3.1.180_2.3.1.41_RXN-9527	1 Octanoyl-[ACP] + 1 malonyl-[ACP] + 1 H+ --> 1 ACP + 1 3-oxo-decanoyl-[ACP] + 1 CO2	3.24	swi: adapted
2.3.1.41	palmitate-biosynthesis-II-(bacteria-and-plants)_2.3.1.180_2.3.1.41_RXN-9531	1 Decanoyl-[ACP] + 1 malonyl-[ACP] + 1 H+ --> 1 ACP + 1 CO2 + 1 3-oxo-dodecanoyl-[ACP]	3.24	swi: adapted
2.3.1.41	palmitate-biosynthesis-II-(bacteria-and-plants)_2.3.1.180_2.3.1.41_RXN-9535	1 Dodecanoyl-[ACP] + 1 malonyl-[ACP] + 1 H+ --> 1 ACP + 1 CO2 + 1 3-oxo-tetradecanoyl-[ACP]	3.24	swi: adapted
2.3.1.41	palmitate-biosynthesis-II-(bacteria-and-plants)_2.3.1.41_RXN-9539	1 Tetradecanoyl-[ACP] + 1 malonyl-[ACP] + 1 H+ --> 1 ACP + 1 CO2 + 1 3-oxo-hexadecanoyl-[ACP]	3.24	swi: adapted
2.3.1.41	palmitoleate-biosynthesis-I_2.3.1.41_RXN-10654	1 cis-D5-dodecenoyl-[ACP] + 1 malonyl-[ACP] + 1 H+ --> 1 ACP + 1 CO2 + 1 3-oxo-cis-D7-tetradecenoyl-[ACP]	3.24	swi: adapted
2.3.1.41	palmitoleate-biosynthesis-I_2.3.1.41_RXN-10658	1 cis-D7-tetradecenoyl-[ACP] + 1 malonyl-[ACP] + 1 H+ --> 1 CO2 + 1 3-oxo-cis-D9-hexadecenoyl-[ACP] + 1 ACP	3.24	swi: adapted
2.3.1.41	stearate-biosynthesis-II-(bacteria-and-plants)_2.3.1.41_RXN-9632	1 Hexadecanoyl-[ACP] + 1 malonyl-[ACP] + 1 H+ --> 1 ACP + 1 CO2 + 1 3-oxo-octadecanoyl-[ACP]	3.24	swi: adapted
2.3.1.46	methionine-biosynthesis-I_2.3.1.46_HOMSUCTRAN-RXN	1 L-homoserine + 1 succinyl-CoA --> 1 coenzyme_A + 1 O-succinyl-L-homoserine	1.54
2.3.1.51	CDP-diacylglycerol-biosynthesis_2.3.1.51_1-ACYLGLYCEROL-3-P-ACYLTRANSFER-RXN	1 cis-vaccenoyl-sn-glycerol-3-phosphate + 1 cis-vaccenoyl-[ACP] --> 1 1,2-di-cis-vaccenoyl-sn-glycerol-3-phosphate + 1 ACP	0.64	swi: adapted
2.3.1.61	2-ketoglutarate-dehydrogenase-complex_2.3.1.61_RXN0-1147	1 H+ + 1 dihydrolipoamide + 1 succinyl-CoA <=> 1 |Oxo-glutarate-dehydro-suc-DH-lipoyl| + 1 coenzyme_A	3.24
2.3.1.8	~multiple-pathways_2.3.1.8_PHOSACETYLTRANS-RXN	1 phosphate + 1 acetyl-CoA <=> 1 coenzyme_A + 1 acetylphosphate	1.6
2.3.1.9	~multiple-pathways_2.3.1.9_ACETYL-COA-ACETYLTRANSFER-RXN	2 acetyl-CoA <=> 1 coenzyme_A + 1 acetoacetyl-CoA	1.72
2.3.1.9	isoleucine-degradation_2-methylbutyrate-biosynthesis_2.3.1.9_METHYLACETOACETYLCOATHIOL-RXN	1 2-methylacetoacetyl-CoA + 1 coenzyme_A <=> 1 propanoyl-CoA + 1 acetyl-CoA	1.72
2.3.3.1	TCA-cycle_2.3.3.1_CITSYN-RXN	1 H2O + 1 acetyl-CoA + 1 oxaloacetate --> 1 H+ + 1 coenzyme_A + 1 citrate	1.54	swi: irreversible
2.3.3.13	leucine-biosynthesis_2.3.3.13_2-ISOPROPYLMALATESYN-RXN	1 acetyl-CoA + 1 H2O + 1 2-oxoisovalerate --> 1 coenzyme_A + 1 H+ + 1 (2S)-2-isopropylmalate	4.19
2.3.3.9	TCA-cycle-variation_2.3.3.9_MALSYN-RXN	1 acetyl-CoA + 1 H2O + 1 glyoxylate --> 1 H+ + 1 (S)-malate + 1 coenzyme_A	3.24
2.4.1.129	peptidoglycan-biosynthesis-I-(meso-diaminopimelate-containing)_2.4.1.129_RXN0-5405	2 undecaprenyldiphospho-N-acetyl-(N-acetylglucosaminyl)muramoyl-L-alanyl-gamma-D-glutamyl-meso-2,6-diaminopimelyl-D-alanyl-D-alanine --> 1 a_peptidoglycan_dimer_(meso-diaminopimelate_containing) + 1 di-trans,octa-cis-undecaprenyl_diphosphate + 1 H+	1.81
2.4.1.182	lipid-IVA-biosynthesis_2.4.1.182_LIPIDADISACCHARIDESYNTH-RXN	1 2,3-bis[(3R)-3-hydroxymyristoyl]-alpha-D-glucosaminyl_1-phosphate + 1 UDP-2,3-bis[O-(3R)-3-hydroxymyristoyl]-alpha-D-glucosamine --> 1 UDP + 1 lipid_A_disaccharide + 1 H+	3.24
2.4.1.227	peptidoglycan-biosynthesis-I-(meso-diaminopimelate-containing)_2.4.1.227_NACGLCTRANS-RXN	1 undecaprenyldiphospho-N-acetylmuramoyl-L-alanyl-gamma-D-glutamyl-meso-2,6-diaminopimelyl-D-alanyl-D-alanine + 1 UDP-N-acetyl-alpha-D-glucosamine <=> 1 UDP + 1 H+ + 1 undecaprenyldiphospho-N-acetyl-(N-acetylglucosaminyl)muramoyl-L-alanyl-gamma-D-glutamyl-meso-2,6-diaminopimelyl-D-alanyl-D-alanine	3.24
2.4.2.1	~metabolism-of-purine_2.4.2.1_ADENPHOSPHOR-RXN	1 adenosine + 1 phosphate <=> 1 alpha-D-ribose-1-phosphate + 1 adenine	4.19
2.4.2.1	~metabolism-of-purine_2.4.2.1_RXN0-5199	1 guanosine + 1 phosphate <=> 1 alpha-D-ribose-1-phosphate + 1 guanine	4.19
2.4.2.1	~metabolism-of-pyrimidine_2.4.2.1_2.4.2.4_URA-PHOSPH-RXN	1 phosphate + 1 deoxyuridine <=> 1 uracil + 1 2-deoxy-alpha-D-ribose_1-phosphate	4.19
2.4.2.1	~multiple-pathways_2.4.2.1_INOPHOSPHOR-RXN	1 phosphate + 1 inosine <=> 1 alpha-D-ribose-1-phosphate + 1 hypoxanthine	4.19
2.4.2.1	~multiple-pathways_2.4.2.1_XANTHOSINEPHOSPHORY-RXN	1 xanthosine + 1 phosphate <=> 1 xanthine + 1 alpha-D-ribose-1-phosphate	4.19
2.4.2.1	purine-deoxyribonucleosides-degradation_2.4.2.1_DEOXYADENPHOSPHOR-RXN	1 deoxyadenosine + 1 phosphate <=> 1 adenine + 1 2-deoxy-alpha-D-ribose_1-phosphate	4.19
2.4.2.1	purine-deoxyribonucleosides-degradation_2.4.2.1_DEOXYGUANPHOSPHOR-RXN	1 phosphate + 1 deoxyguanosine <=> 1 guanine + 1 2-deoxy-alpha-D-ribose_1-phosphate	4.19
2.4.2.1	purine-deoxyribonucleosides-degradation_2.4.2.1_DEOXYINOPHOSPHOR-RXN	1 deoxyinosine + 1 phosphate <=> 1 hypoxanthine + 1 2-deoxy-alpha-D-ribose_1-phosphate	4.19
2.4.2.10	de-novo-biosynthesis-of-uridine-5'-monophosphate_2.4.2.10_OROPRIBTRANS-RXN	1 orotidine-5'-phosphate + 1 diphosphate <=> 1 5-phospho-alpha-D-ribose_1-diphosphate + 1 orotate	2.57
2.4.2.14	~no-pathway_2.4.2.14_PRPPAMIDOTRANS-RXN	1 L-glutamate + 1 diphosphate + 1 5-phospho-beta-D-ribosyl-amine <-- 1 L-glutamine + 1 5-phospho-alpha-D-ribose_1-diphosphate + 1 H2O	2.57
2.4.2.17	histidine-biosynthesis-I_2.4.2.17_ATPPHOSPHORIBOSYLTRANS-RXN	1 phosphoribosyl-ATP + 1 diphosphate <-- 1 5-phospho-alpha-D-ribose_1-diphosphate + 1 ATP	3.15
2.4.2.18	tryptophan-biosynthesis_2.4.2.18_PRTRANS-RXN	1 N-(5'-phosphoribosyl)-anthranilate + 1 diphosphate <-- 1 5-phospho-alpha-D-ribose_1-diphosphate + 1 anthranilate	3.24
2.4.2.19	NAD-biosynthesis-from-2-amino-3-carboxymuconate-semialdehyde_NAD-biosynthesis_2.4.2.19_QUINOPRIBOTRANS-RXN	2 H+ + 1 5-phospho-alpha-D-ribose_1-diphosphate + 1 quinolinate --> 1 diphosphate + 1 CO2 + 1 nicotinate_D-ribonucleotide	3.15
2.4.2.22	salvage-pathways-of-guanine,-xanthine,-and-their-nucleosides_2.4.2.8_2.4.2.22_XANPRIBOSYLTRAN-RXN	1 diphosphate + 1 XMP <-- 1 xanthine + 1 5-phospho-alpha-D-ribose_1-diphosphate	3.15
2.4.2.22	salvage-pathways-of-purine-and-pyrimidine-nucleotides_2.4.2.8_2.4.2.22_GUANPRIBOSYLTRAN-RXN	1 GMP + 1 diphosphate <-- 1 5-phospho-alpha-D-ribose_1-diphosphate + 1 guanine	3.15
2.4.2.4	~metabolism-of-pyrimidine_2.4.2.4_THYM-PHOSPH-RXN	1 phosphate + 1 thymidine <=> 1 thymine + 1 2-deoxy-alpha-D-ribose_1-phosphate	3.24
2.4.2.7	~metabolism-of-salvage-pathways-purine_2.4.2.7_ADENPRIBOSYLTRAN-RXN	1 AMP + 1 diphosphate <-- 1 5-phospho-alpha-D-ribose_1-diphosphate + 1 adenine	3.15
2.4.2.8	~no-pathway_2.4.2.8_HYPOXANPRIBOSYLTRAN-RXN	1 diphosphate + 1 IMP <-- 1 5-phospho-alpha-D-ribose_1-diphosphate + 1 hypoxanthine	3.15
2.4.2.9	~metabolism-of-salvage-pathways-pyrimidine_2.4.2.9_URACIL-PRIBOSYLTRANS-RXN	1 diphosphate + 1 UMP <=> 1 uracil + 1 5-phospho-alpha-D-ribose_1-diphosphate	3.15	swi: adapted; UMP
2.4.99.12	KDO-transfer-to-lipid-IVA-I_2.4.99.12_2.4.99.13_KDOTRANS-RXN	1 CMP-3-deoxy-D-manno-octulosonate + 1 lipid_IVA --> 1 H+ + 1 alpha-Kdo-(2rarr6)-lipid_IVA + 1 CMP	2.27
2.4.99.13	KDO-transfer-to-lipid-IVA-I_2.4.99.13_KDOTRANS2-RXN	1 CMP-3-deoxy-D-manno-octulosonate + 1 alpha-Kdo-(2rarr6)-lipid_IVA --> 1 alpha-Kdo-(2->4)-alpha-Kdo-(2->6)-lipid_IVA + 1 H+ + 1 CMP	1.51
2.5.1.1	~metabolism-of-biosynthesis_2.5.1.1_GPPSYN-RXN	1 dimethylallyl_diphosphate + 1 isopentenyl_diphosphate <=> 1 diphosphate + 1 geranyl_diphosphate	1.65
2.5.1.10	~metabolism-of-biosynthesis_2.5.1.10_FPPSYN-RXN	1 isopentenyl_diphosphate + 1 geranyl_diphosphate <=> 1 diphosphate + 1 (2E,6E)-farnesyl_diphosphate	3.08
2.5.1.15	~no-pathway_2.5.1.15_H2PTEROATESYNTH-RXN	1 6-hydroxymethyl-dihydropterin_diphosphate + 1 4-aminobenzoate --> 1 diphosphate + 1 7,8-dihydropteroate	0.73
2.5.1.19	~no-pathway_2.5.1.19_2.5.1.19-RXN	1 phosphoenolpyruvate + 1 shikimate-3-phosphate <=> 1 5-enolpyruvyl-shikimate-3-phosphate + 1 phosphate	3.24
2.5.1.31	all-trans-decaprenyl-diphosphate-biosynthesis_2.5.1.91_RXN-9106	7 isopentenyl_diphosphate + 1 (2E,6E)-farnesyl_diphosphate <=> 1 all-trans-decaprenyl_diphosphate + 7 diphosphate	2.39
2.5.1.31	di-trans,poly-cis-undecaprenyl-phosphate-biosynthesis_2.5.1.31_RXN-8999	8 isopentenyl_diphosphate + 1 (2E,6E)-farnesyl_diphosphate <=> 8 diphosphate + 1 di-trans,octa-cis-undecaprenyl_diphosphate	2.39
2.5.1.39	ubiquinol-10-biosynthesis_2.5.1.39_RXN-9230	1 4-hydroxybenzoate + 1 all-trans-decaprenyl_diphosphate --> 1 diphosphate + 1 3-decaprenyl-4-hydroxybenzoate	2.41
2.5.1.47	cysteine-biosynthesis-I_2.5.1.47_ACSERLY-RXN	1 O-acetyl-L-serine + 1 hydrogen_sulfide <=> 1 L-cysteine + 1 H+ + 1 acetate	3.15
2.5.1.48	methionine-biosynthesis-I_2.5.1.48_O-SUCCHOMOSERLYASE-RXN	1 L-cysteine + 1 O-succinyl-L-homoserine --> 1 L-cystathionine + 1 succinate + 1 H+	0.78
2.5.1.49	homocysteine-biosynthesis_2.5.1.49_ACETYLHOMOSER-CYS-RXN	1 O-acetyl-L-homoserine + 1 hydrogen_sulfide <=> 1 H+ + 1 acetate + 1 L-homocysteine	1.81
2.5.1.49	S-methyl-5-thio-alpha-D-ribose-1-phosphate-degradation-II_2.5.1.49_O-ACETYLHOMOSERINE-THIOL-LYASE-RXN	1 O-acetyl-L-homoserine + 1 methanethiol --> 1 acetate + 1 H+ + 1 L-methionine	1.81
2.5.1.54	~no-pathway_2.5.1.54_DAHPSYN-RXN	1 H2O + 1 D-erythrose-4-phosphate + 1 phosphoenolpyruvate --> 1 phosphate + 1 3-deoxy-D-arabino-heptulosonate-7-phosphate	3.24
2.5.1.55	CMP-KDO-biosynthesis_2.5.1.55_KDO-8PSYNTH-RXN	1 phosphoenolpyruvate + 1 D-arabinose_5-phosphate + 1 H2O --> 1 phosphate + 1 3-deoxy-D-manno-octulosonate_8-phosphate	3.24
2.5.1.6	~multiple-pathways_2.5.1.6_S-ADENMETSYN-RXN	1 L-methionine + 1 ATP + 1 H2O --> 1 phosphate + 1 diphosphate + 1 S-adenosyl-L-methionine	3.24
2.5.1.6	~no-pathway_3.6.1.25_TRIPHOSPHATASE-RXN	1 PPPi + 1 H2O --> 1 diphosphate + 1 phosphate	3.24	swi: postulated
2.5.1.7	UDP-N-acetylmuramoyl-pentapeptide-biosynthesis_2.5.1.7_UDPNACETYLGLUCOSAMENOLPYRTRANS-RXN	1 phosphoenolpyruvate + 1 UDP-N-acetyl-alpha-D-glucosamine --> 1 UDP-N-acetyl-alpha-D-glucosamine-enolpyruvate + 1 phosphate	3.24
2.5.1.72	NAD-biosynthesis-I-(from-aspartate)_2.5.1.72_QUINOLINATE-SYNTHA-RXN	1 dihydroxyacetone_phosphate + 1 alpha-iminosuccinate --> 2 H2O + 1 phosphate + 1 quinolinate	0.64
2.5.1.78	flavin-biosynthesis_2.5.1.78_LUMAZINESYN-RXN	1 5-amino-6-(D-ribitylamino)uracil + 1 1-deoxy-L-glycero-tetrulose_4-phosphate --> 1 H+ + 1 6,7-dimethyl-8-(1-D-ribityl)lumazine + 1 phosphate + 2 H2O	2.41
2.5.1.9	flavin-biosynthesis_2.5.1.9_RIBOFLAVIN-SYN-RXN	2 6,7-dimethyl-8-(1-D-ribityl)lumazine + 1 H+ --> 1 riboflavin + 1 5-amino-6-(D-ribitylamino)uracil	0.67
2.6.1.-	lysine-degra_2.6.1.-_RXN	1 cadaverine + 1 pyruvate --> 1 L-alanine + 1 5-aminopentanal	1.43	swi: manual; Drüppel et al. 2014a
2.6.1.-	lysine-degradation_2.6.1.48_VAGL-RXN	1 pyruvate + 1 5-aminopentanoate --> 1 L-alanine + 1 glutarate_semialdehyde	1.43	swi: adapted; Drüppel et al. 2014a
2.6.1.-	lysine-degradation-X_2.6.1.-_RXN-10853	1 cadaverine + 1 pyruvate --> 1 H+ + 1 L-alanine + 1 H2O + 1 1-piperideine	1.43	swi: adapted; Drüppel et al. 2014a
2.6.1.1	~multiple-pathways_2.6.1.1_ASPAMINOTRANS-RXN	1 2-oxoglutarate + 1 L-aspartate <=> 1 oxaloacetate + 1 L-glutamate	0.73
2.6.1.1	hydrogen-sulfide-biosynthesis_L-cysteine-degradation_2.6.1.1_CYSTEINE-AMINOTRANSFERASE-RXN	1 2-oxoglutarate + 1 L-cysteine <=> 1 L-glutamate + 1 3-mercaptopyruvate	0.73
2.6.1.11	ornithine-biosynthesis_arginine-biosynthesis_2.6.1.11_ACETYLORNTRANSAM-RXN	1 2-oxoglutarate + 1 N-acetyl-L-ornithine <=> 1 L-glutamate + 1 N-acetyl-L-glutamate_5-semialdehyde	3.24
2.6.1.16	CMP-legionaminate-biosynthesis_UDP-N-acetyl-D-glucosamine-biosynthesis_2.6.1.16_L-GLN-FRUCT-6-P-AMINOTRANS-RXN	1 D-fructose-6-phosphate + 1 L-glutamine <=> 1 L-glutamate + 1 alpha-D-glucosamine_6-phosphate	3.24	swi: reversible
2.6.1.17	lysine-biosynthesis-I_2.6.1.17_SUCCINYLDIAMINOPIMTRANS-RXN	1 2-oxoglutarate + 1 N-succinyl-L,L-2,6-diaminopimelate <=> 1 N-succinyl-2-amino-6-ketopimelate + 1 L-glutamate	0.87
2.6.1.19	~multiple-pathways_2.6.1.19_BS353590	1 2-oxoglutarate + 1 beta-alanine <=> 1 L-glutamate + 1 malonate_semialdehyde	0
2.6.1.19	~multiple-pathways_2.6.1.19_GABATRANSAM-RXN	1 2-oxoglutarate + 1 4-aminobutanoate <=> 1 succinate_semialdehyde + 1 L-glutamate	0
2.6.1.36	lysine-degradation-VI_2.6.1.36_L-LYSINE-AMINOTRANSFERASE-RXN	1 pyruvate + 1 L-lysine --> 1 (S)-2-amino-6-oxohexanoate + 1 L-alanine	0	swi: adapted; Drüppel et al. 2014a
2.6.1.39	lysine-degradation_lysine-biosynthesis_2.6.1.39_2-AMINOADIPATE-AMINOTRANSFERASE-RXN	1 pyruvate + 1 L-2-aminoadipate <=> 1 L-alanine + 1 2-oxoadipate	0.64	swi: adapted; Drüppel et al. 2014a
2.6.1.42	~metabolism-of-isoleucine_2.6.1.42_BRANCHED-CHAINAMINOTRANSFERILEU-RXN	1 2-oxoglutarate + 1 L-isoleucine <=> 1 L-glutamate + 1 2-keto-3-methyl-valerate	3.08
2.6.1.42	~multiple-pathways_2.6.1.42_BRANCHED-CHAINAMINOTRANSFERVAL-RXN	1 2-oxoglutarate + 1 L-valine <=> 1 L-glutamate + 1 2-oxoisovalerate	3.08
2.6.1.42	isoleucine-degradation_2.6.1.42_BRANCHED-CHAINAMINOTRANSFERILEU-RXN	1 2-oxoglutarate + 1 L-isoleucine <=> 1 L-glutamate + 1 (S)-3-methyl-2-oxopentanoate	3.08
2.6.1.42	leucine-biosynthesis_2.6.1.42_BRANCHED-CHAINAMINOTRANSFERLEU-RXN	1 2-oxoglutarate + 1 L-leucine <=> 1 L-glutamate + 1 4-methyl-2-oxopentanoate	3.08
2.6.1.42	valine-degra_2.6.1.42_BRANCHED-CHAINAMINOTRANSFERVAL-RXN	1 2-oxoglutarate + 1 L-valine <=> 1 L-glutamate + 1 3-methyl-2-oxobutanoate	3.08
2.6.1.52	serine-biosynthesis_2.6.1.52_PSERTRANSAM-RXN	1 3-phospho-L-serine + 1 2-oxoglutarate <=> 1 L-glutamate + 1 3-phospho-hydroxypyruvate	3.24
2.6.1.57	~multiple-pathways_2.6.1.57_TYROSINE-AMINOTRANSFERASE-RXN	1 2-oxoglutarate + 1 L-tyrosine <=> 1 L-glutamate + 1 4-hydroxyphenylpyruvate	0.73
2.6.1.57	phenylalanine-biosynthesis_2.6.1.57_PHEAMINOTRANS-RXN	1 L-glutamate + 1 keto-phenylpyruvate <=> 1 L-phenylalanine + 1 2-oxoglutarate	0.73
2.6.1.57	phenylalanine-degradation_2.6.1.57_PHEAMINOTRANS-RXN	1 L-glutamate + 1 2-oxo-3-phenylpropanoate <=> 1 L-phenylalanine + 1 2-oxoglutarate	0.73
2.6.1.77	beta-alanine-degradation_beta-alanine-biosynthesis_2.6.1.18_2.6.1.18-RXN	1 L-alanine + 1 malonate_semialdehyde <=> 1 beta-alanine + 1 pyruvate	3.24
2.6.1.85	~no-pathway_2.6.1.85_PABASYN-RXN	1 chorismate + 1 L-glutamine <=> 1 L-glutamate + 1 4-amino-4-deoxychorismate	0.78
2.6.1.9	histidine-biosynthesis-I_2.6.1.9_HISTAMINOTRANS-RXN	1 L-glutamate + 1 imidazole_acetol-phosphate <=> 1 2-oxoglutarate + 1 L-histidinol-phosphate	1.6
2.7.1.130	lipid-IVA-biosynthesis_2.7.1.130_TETRAACYLDISACC4KIN-RXN	1 lipid_A_disaccharide + 1 ATP --> 1 lipid_IVA + 1 H+ + 1 ADP	3.24
2.7.1.148	methylerythritol-phosphate-pathway_2.7.1.148_2.7.1.148-RXN	1 4-(cytidine_5'-diphospho)-2-C-methyl-D-erythritol + 1 ATP --> 1 H+ + 1 2-phospho-4-(cytidine_5'-diphospho)-2-C-methyl-D-erythritol + 1 ADP	2.48
2.7.1.17	~metabolism-of-degradation_2.7.1.17_XYLULOKIN-RXN	1 ATP + 1 D-xylulose --> 1 ADP + 1 H+ + 1 D-xylulose-5-phosphate	3.24
2.7.1.2	glycolysis_2.7.1.2_GLUCOKIN-RXN	1 ATP + 1 beta-D-glucose --> 1 ADP + 1 H+ + 1 beta-D-glucose-6-phosphate	0.64
2.7.1.21	~metabolism-of-salvage-pathways-pyrimidine_2.7.1.21_THYKI-RXN	1 thymidine + 1 ATP --> 1 dTMP + 1 H+ + 1 ADP	3.15
2.7.1.21	salvage-pathways-of-pyrimidine-deoxyribonucleotides_2.7.1.21_DURIDKI-RXN	1 deoxyuridine + 1 ATP --> 1 H+ + 1 dUMP + 1 ADP	3.15
2.7.1.23	~metabolism-of-phosphorylation-dephosphorylation_2.7.1.23_NAD-KIN-RXN	1 ATP + 1 NAD+ --> 1 H+ + 1 ADP + 1 NADP+	2.48
2.7.1.24	coenzyme-A-biosynthesis_2.7.1.24_DEPHOSPHOCOAKIN-RXN	1 3'-dephospho-CoA + 1 ATP --> 1 H+ + 1 coenzyme_A + 1 ADP	3.15
2.7.1.25	sulfate-activation-for-sulfonation_2.7.1.25_ADENYLYLSULFKIN-RXN	1 adenosine_5'-phosphosulfate + 1 ATP --> 1 phosphoadenosine-5'-phosphosulfate + 1 H+ + 1 ADP	0.64	swi: irreversible
2.7.1.26	flavin-biosynthesis_5,6-dimethylbenzimidazole-biosynthesis_2.7.1.26_RIBOFLAVINKIN-RXN	1 riboflavin + 1 ATP --> 1 H+ + 1 FMN + 1 ADP	0.64
2.7.1.33	phosphopantothenate-biosynthesis_2.7.1.33_PANTOTHENATE-KIN-RXN	1 (R)-pantothenate + 1 ATP --> 1 ADP + 1 H+ + 1 D-4'-phosphopantothenate	0.64
2.7.1.39	methionine-biosynthesis_threonine-biosynthesis-from-homoserine_2.7.1.39_HOMOSERKIN-RXN	1 L-homoserine + 1 ATP --> 1 H+ + 1 O-phospho-L-homoserine + 1 ADP	0
2.7.1.4	~multiple-pathways_2.7.1.4_FRUCTOKINASE-RXN	1 ATP + 1 beta-D-fructofuranose --> 1 ADP + 1 D-fructose-6-phosphate + 1 H+	3.08	swi: adapted
2.7.1.40	glycolysis_2.7.1.40_PEPDEPHOS-RXN	1 ATP + 1 pyruvate <-- 1 H+ + 1 phosphoenolpyruvate + 1 ADP	3.24	swi: irreversible
2.7.1.59	chitin-derivatives-degradation_N-acetylglucosamine-degradation_2.7.1.59_N-ACETYLGLUCOSAMINE-KINASE-RXN	1 ATP + 1 N-acetyl-beta-D-glucosamine --> 1 ADP + 1 N-acetyl-D-glucosamine_6-phosphate + 1 H+	0.64
2.7.1.71	~no-pathway_2.7.1.71_SHIKIMATE-KINASE-RXN	1 shikimate + 1 ATP --> 1 shikimate-3-phosphate + 1 H+ + 1 ADP	0.64
2.7.1.92	myo-inositol-degradation-I_2.7.1.92_5-DEHYDRO-2-DEOXYGLUCONOKINASE-RXN	1 ATP + 1 2-deoxy-5-dehydro-D-gluconate --> 1 H+ + 1 5-dehydro-2-deoxy-D-gluconate_6-phosphate + 1 ADP	1.65
2.7.2.1	~multiple-pathways_2.7.2.1_ACETATEKIN-RXN	1 ATP + 1 acetate --> 1 ADP + 1 acetylphosphate	3.15
2.7.2.11	proline-biosynthesis_citrulline-biosynthesis_2.7.2.11_GLUTKIN-RXN	1 ATP + 1 L-glutamate --> 1 ADP + 1 L-glutamate-5-phosphate	3.24
2.7.2.3	glycolysis_2.7.2.3_PHOSGLYPHOS-RXN	1 ATP + 1 3-phospho-D-glycerate <=> 1 1,3-bisphospho-D-glycerate + 1 ADP	3.24
2.7.2.4	~metabolism-of-biosynthesis_2.7.2.4_ASPARTATEKIN-RXN	1 ATP + 1 L-aspartate --> 1 L-aspartyl-4-phosphate + 1 ADP	4.19
2.7.2.8	ornithine-biosynthesis_arginine-biosynthesis_2.7.2.8_ACETYLGLUTKIN-RXN	1 ATP + 1 N-acetyl-L-glutamate --> 1 N-acetylglutamyl-phosphate + 1 ADP	3.24
2.7.4.22	~no-pathway_2.7.4.22_2.7.4.25_RXN-12002	1 UMP + 1 ATP --> 1 UDP + 1 ADP	3.24	swi : adapted; UMP
2.7.4.25	~metabolism-of-salvage-pathways-pyrimidine_2.7.4.25_RXN-11832	1 CMP + 1 ATP --> 1 CDP + 1 ADP	2.48
2.7.4.25	~no-pathway_2.7.4.25_RXN-7913	1 dCMP + 1 ATP --> 1 dCDP + 1 ADP	2.48
2.7.4.3	salvage-pathways-of-purine-and-pyrimidine-nucleotides_2.7.4.3_ADENYL-KIN-RXN	1 AMP + 1 ATP <=> 2 ADP	3.15
2.7.4.6	~metabolism-of-ribonucleotides-pyrimidine_2.7.4.6_CDPKIN-RXN	1 ATP + 1 CDP <=> 1 CTP + 1 ADP	3.15
2.7.4.6	~no-pathway_2.7.4.6_DADPKIN-RXN	1 dADP + 1 ATP --> 1 dATP + 1 ADP	3.15
2.7.4.6	~no-pathway_2.7.4.6_DGDPKIN-RXN	1 ATP + 1 dGDP --> 1 dGTP + 1 ADP	3.15
2.7.4.6	de-novo-biosynthesis-of-pyrimidine-deoxyribonucleotides_2.7.4.6_DCDPKIN-RXN	1 ATP + 1 dCDP --> 1 dCTP + 1 ADP	3.15
2.7.4.6	de-novo-biosynthesis-of-pyrimidine-deoxyribonucleotides_2.7.4.6_DTDPKIN-RXN	1 dTDP + 1 ATP --> 1 dTTP + 1 ADP	3.15
2.7.4.6	de-novo-biosynthesis-of-pyrimidine-deoxyribonucleotides_2.7.4.6_DUDPKIN-RXN	1 dUDP + 1 ATP --> 1 dUTP + 1 ADP	3.15
2.7.4.6	ppGpp-biosynthesis_2.7.4.6_GDPKIN-RXN	1 GDP + 1 ATP --> 1 GTP + 1 ADP	3.15
2.7.4.6	pyrimidine-ribonucleotides-interconversion_2.7.4.6_UDPKIN-RXN	1 ATP + 1 UDP --> 1 UTP + 1 ADP	3.15
2.7.4.8	~no-pathway_2.7.4.8_GMKALT-RXN	1 ATP + 1 dGMP --> 1 dGDP + 1 ADP	3.24
2.7.4.8	salvage-pathways-of-purine-and-pyrimidine-nucleotides_2.7.4.8_GUANYL-KIN-RXN	1 ATP + 1 GMP --> 1 GDP + 1 ADP	3.24
2.7.4.9	~metabolism-of-pyrimidine_2.7.4.9_DTMPKI-RXN	1 ATP + 1 dTMP --> 1 ADP + 1 dTDP	2.48
2.7.4.9	~no-pathway_2.7.4.22_2.7.4.9_2.7.4.25_RXN-14122	1 dUMP + 1 ATP --> 1 dUDP + 1 ADP	2.48
2.7.6.1	PRPP-biosynthesis-I_2.7.6.1_PRPPSYN-RXN	1 ATP + 1 D-ribose-5-phosphate <=> 1 5-phospho-alpha-D-ribose_1-diphosphate + 1 H+ + 1 AMP	3.24
2.7.6.3	~no-pathway_2.7.6.3_H2PTERIDINEPYROPHOSPHOKIN-RXN	1 ATP + 1 6-hydroxymethyl-7,8-dihydropterin --> 1 H+ + 1 6-hydroxymethyl-dihydropterin_diphosphate + 1 AMP	3.03
2.7.6.5	ppGpp-biosynthesis_2.7.6.5_GDPPYPHOSKIN-RXN	1 GDP + 1 ATP --> 1 ppGpp + 1 AMP	0.94
2.7.6.5	ppGpp-biosynthesis_2.7.6.5_GTPPYPHOSKIN-RXN	1 GTP + 1 ATP --> 1 pppGpp + 1 AMP	0.94
2.7.7.18	~multiple-pathways_2.7.7.18_NICONUCADENYLYLTRAN-RXN	1 ATP + 1 nicotinate_D-ribonucleotide + 1 H+ --> 1 nicotinate_adenine_dinucleotide + 1 diphosphate	2.48
2.7.7.2	flavin-biosynthesis_2.7.7.2_FADSYN-RXN	1 ATP + 2 H+ + 1 FMN --> 1 FAD + 1 diphosphate	0.73
2.7.7.23	~metabolism-of-biosynthesis_2.7.7.23_NAG1P-URIDYLTRANS-RXN	1 N-acetyl-alpha-D-glucosamine_1-phosphate + 1 UTP + 1 H+ --> 1 UDP-N-acetyl-alpha-D-glucosamine + 1 diphosphate	0.64
2.7.7.3	coenzyme-A-biosynthesis_2.7.7.3_PANTEPADENYLYLTRAN-RXN	1 ATP + 1 H+ + 1 4'-phosphopantetheine --> 1 3'-dephospho-CoA + 1 diphosphate	4.1
2.7.7.38	CMP-KDO-biosynthesis_2.7.7.38_CPM-KDOSYNTH-RXN	1 3-deoxy-D-manno-octulosonate + 1 CTP --> 1 diphosphate + 1 CMP-3-deoxy-D-manno-octulosonate	3.08
2.7.7.4	~multiple-pathways_2.7.7.4_SULFATE-ADENYLYLTRANS-RXN	1 ATP + 1 sulfate + 1 H+ <=> 1 diphosphate + 1 adenosine_5'-phosphosulfate	3.43
2.7.7.41	~no-pathway_2.7.7.41_RXN0-5515	1 CTP + 1 1,2-di-cis-vaccenoyl-sn-glycerol-3-phosphate + 1 H+ --> 1 diphosphate + 1 CDP-1,2-di-cis-vaccenoylglycerol	3.03	swi: adapted
2.7.7.60	methylerythritol-phosphate-pathway_2.7.7.60_2.7.7.60-RXN	1 2-C-methyl-D-erythritol_4-phosphate + 1 H+ + 1 CTP --> 1 4-(cytidine_5'-diphospho)-2-C-methyl-D-erythritol + 1 diphosphate	2.57
2.7.7.9	~multiple-pathways_2.7.7.9_GLUC1PURIDYLTRANS-RXN	1 H+ + 1 alpha-D-glucose_1-phosphate + 1 UTP <=> 1 UDP-alpha-D-glucose + 1 diphosphate	3.15
2.7.8.-	cardiolipin-biosynthesis-I_2.7.8.-_CARDIOLIPSYN-RXN	L-1-phosphatidylglycerol + CDP-1,2-di-cis-vaccenoylglycerol --> 1 cardiolipin + 1 CMP + H+	0.87	swi: adapted
2.7.8.13	peptidoglycan-biosynthesis-I-(meso-diaminopimelate-containing)_2.7.8.13_PHOSNACMURPENTATRANS-RXN	1 UDP-N-acetylmuramoyl-L-alanyl-gamma-D-glutamyl-meso-2,6-diaminopimelyl-D-alanyl-D-alanine + 1 di-trans,octa-cis-undecaprenyl_phosphate --> 1 UMP + 1 undecaprenyldiphospho-N-acetylmuramoyl-L-alanyl-gamma-D-glutamyl-meso-2,6-diaminopimelyl-D-alanyl-D-alanine	3.24
2.7.8.5	PG_I-2.7.8.5-PHOSPHAGLYPSYN-RXN	1 CDP-1,2-di-cis-vaccenoylglycerol + 1 sn-glycerol-3-phosphate --> 1 H+ + 1 CMP + 1 L-1-phosphatidylglycerol-phosphate	3.15	swi: adapted
2.7.8.8	PE_2.7.8.8_RXN	1 CDP-1,2-di-cis-vaccenoylglycerol + 1 L-serine --> 1 H+ + 1 CMP + 1 L-1-phosphatidylserine	1.6	swi: manual
2.7.9.1	C4_photosynthetic_carbon_assimilation_cycle-2.7.9.1-PYRUVATEORTHOPHOSPHATE-DIKINASE-RXN	1 ATP + 1 phosphate + 1 pyruvate --> 1 AMP + 1 phosphoenolpyruvate + 1 diphosphate + 1 H+	2.57	swi: manual; DFL12
2.8.1.1	thiosulfate-disproportionation-III-(rhodanese)_2.8.1.1_THIOSULFATE-SULFURTRANSFERASE-RXN	1 hydrogen_cyanide + 1 thiosulfate <=> 1 sulfite + 2 H+ + 1 thiocyanate	0.64	swi: reversible; BRENDA (E.coli)
2.8.1.2	TCA-cycle_2.8.1.2_BR48100	1 3-mercaptopyruvate + 1 hydrogen_cyanide <=> 1 thiocyanate + 1 pyruvate + 1 H+	3.15
2.8.1.7	alanine-biosynthesis-III_2.8.1.7_RXN0-308	1 L-cysteine + 1 |L-Cysteine-Desulfurases| --> 1 |Persulfurated-L-cysteine-desulfurases| + 1 L-alanine	1.65
2.8.3.13	lysine-degradation_2.8.3.13_RXN-14724	1 succinyl-CoA + 1 glutarate --> 1 succinate + 1 glutaryl-CoA	0.64
2.8.3.5	TCA-cycle_2.8.3.5_RXNI-2	1 acetoacetate + 1 succinyl-CoA <=> 1 succinate + 1 acetoacetyl-CoA	4.1
3.1.1.-	PHB_degradation-3.1.1.75-3.1.1.75-RXN	1 PHB + 1 H2O --> 1 (R)-3-hydroxybutanoate	0.73	swi: manual; DFL12
3.1.1.29	~no-pathway_3.1.1.29_RXN-12460	1 |Charged-ASN-tRNAs| + 1 H2O --> 2 H+ + 1 |ASN-tRNAs| + 1 L-asparagine	3.24
3.1.1.31	~multiple-pathways_3.1.1.31_6PGLUCONOLACT-RXN	1 H2O + 1 6-phospho-D-glucono-1,5-lactone --> 1 H+ + 1 6-phospho-D-gluconate	3.03
3.1.2.4	beta-alanine-biosynthesis-II_3.1.2.4_RXN-6384	1 3-hydroxypropanoyl-CoA + 1 H2O --> 1 coenzyme_A + 1 3-hydroxypropionate + 1 H+	0.78
3.1.2.4	valine-degradation-I_3.1.2.4_3-HYDROXYISOBUTYRYL-COA-HYDROLASE-RXN	1 (S)-3-hydroxy-isobutanoyl-CoA + 1 H2O --> 1 H+ + 1 (S)-3-hydroxy-isobutanoate + 1 coenzyme_A	0.78
3.1.3.11	glycolysis_3.1.3.11_F16BDEPHOS-RXN	1 fructose-1,6-bisphosphate + 1 H2O --> 1 phosphate + 1 D-fructose-6-phosphate	0.64
3.1.3.15	histidine-biosynthesis-I_3.1.3.15_HISTIDPHOS-RXN	1 L-histidinol-phosphate + 1 H2O --> 1 phosphate + 1 histidinol	0.78
3.1.3.27	~no-pathway_3.1.3.27_RXN-13313	1 L-1-phosphatidylglycerol-phosphate + 1 H2O --> 1 L-1-phosphatidylglycerol + 1 phosphate	2.36	swi: adapted
3.1.3.3	serine-biosynthesis_3.1.3.3_RXN0-5114	1 3-phospho-L-serine + 1 H2O --> 1 phosphate + 1 L-serine	0.64
3.1.3.45	CMP-KDO-biosynthesis_3.1.3.45_KDO-8PPHOSPHAT-RXN	1 3-deoxy-D-manno-octulosonate_8-phosphate + 1 H2O --> 1 3-deoxy-D-manno-octulosonate + 1 phosphate	0
3.1.3.5	~no-pathway_3.1.3.5_RXN0-5292	1 dCMP + 1 H2O --> 1 phosphate + 1 deoxycytidine	3.24
3.1.3.5	~no-pathway_3.1.3.5_RXN-14025	1 H2O + 1 UMP --> 1 phosphate + 1 uridine	3.24	swi : adapted; UMP
3.1.3.5	~no-pathway_3.1.3.5_RXN-14026	1 H2O + 1 CMP --> 1 phosphate + 1 cytidine	3.24
3.1.3.5	~no-pathway_3.1.3.5_RXN-14161	1 H2O + 1 dAMP --> 1 phosphate + 1 deoxyadenosine	3.24
3.1.3.5	~no-pathway_3.1.3.5_RXN-7607	1 IMP + 1 H2O --> 1 phosphate + 1 inosine	3.24
3.1.3.5	~no-pathway_3.1.3.5_RXN-7609	1 H2O + 1 GMP --> 1 phosphate + 1 guanosine	3.24
3.1.3.5	~no-pathway_3.1.3.5_THYMIDYLATE-5-PHOSPHATASE-RXN	1 dTMP + 1 H2O --> 1 thymidine + 1 phosphate	3.24
3.1.3.5	salvage-pathways-of-adenine,-hypoxanthine,-and-their-nucleosides_3.1.3.5_AMP-DEPHOSPHORYLATION-RXN	1 H2O + 1 AMP --> 1 phosphate + 1 adenosine	3.24
3.1.3.5	urate-biosynthesis_3.1.3.5_XMPXAN-RXN	1 H2O + 1 XMP --> 1 xanthosine + 1 phosphate	3.24
3.1.3.6	~no-pathway_3.1.3.5_RXN-14142	1 dGMP + 1 H2O --> 1 phosphate + 1 deoxyguanosine	0.85
3.1.3.7	~no-pathway_3.1.3.7_325-BISPHOSPHATE-NUCLEOTIDASE-RXN	1 adenosine_3',5'-bisphosphate + 1 H2O --> 1 phosphate + 1 AMP	3.08
3.1.5.1	~no-pathway_3.1.5.1_DGTPTRIPHYDRO-RXN	1 dGTP + 1 H2O --> 1 H+ + 1 PPPi + 1 deoxyguanosine	1.51
3.1.7.2	ppGpp-biosynthesis_3.1.7.2_PPGPPSYN-RXN	1 ppGpp + 1 H2O --> 1 H+ + 1 diphosphate + 1 GDP	2.37
3.1.7.2	ppGpp-biosynthesis_3.1.7.2_RXN0-6427	1 H2O + 1 pppGpp --> 1 diphosphate + 1 H+ + 1 GTP	2.37
3.2.1.-	phenylalanine_degra_3.2.1.-_THIOESTERASE2-RXN	1 2-(1,2-epoxy-1,2-dihydrophenyl)acetyl-CoA + 1 H2O --> 1 2-(1,2-epoxy-1,2-dihydrophenyl)acetate + 1 coenzyme_A + 1 H+	0.64	swi: manual; Drüppel et al. 2014a
3.2.1.-	phenylalanine_degra_3.2.1.-_THIOESTERASE-RXN	1 phenylacetyl-CoA + 1 H2O --> 1 phenylacetate + 1 coenzyme_A + 1 H+	0.64	swi: manual; Drüppel et al. 2014a
3.2.1.20	~no-pathway_3.2.1.20_RXN-2141	1 sucrose + 1 H2O --> 1 alpha-D-glucose + 1 beta-D-fructofuranose	1.81	swi: adapted
3.3.1.1	S-adenosyl-L-methionine-cycle_methionine-degradation_3.3.1.1_ADENOSYLHOMOCYSTEINASE-RXN	1 S-adenosyl-L-homocysteine + 1 H2O --> 1 L-homocysteine + 1 adenosine	4.19
3.3.2.12	phenylacetate-degradation-I-(aerobic)_3.3.2.12_RXNMETA-12671	1 2-oxepin-2(3H)-ylideneacetyl-CoA + 1 H2O --> 1 3-oxo-5,6-dehydrosuberyl-CoA_semialdehyde	1.72
3.4.16.4	peptidoglycan-biosynthesis-I-(meso-diaminopimelate-containing)_3.4.16.4_RXN-11302	2 a_peptidoglycan_dimer_(meso-diaminopimelate_containing) --> 1 a_peptidoglycan_with_D,D_cross-links_(meso-diaminopimelate_containing) + 1 D-alanine	0.64
3.5.1.1	~metabolism-of-asparagine_3.5.1.1_ASPARAGHYD-RXN	1 L-asparagine + 1 H2O --> 1 L-aspartate + 1 ammonia + 1 H+	0.76
3.5.1.108	lipid-IVA-biosynthesis_3.5.1.108_UDPACYLGLCNACDEACETYL-RXN	1 UDP-3-O-[(3R)-3-hydroxymyristoyl]-N-acetyl-alpha-D-glucosamine + 1 H2O --> 1 UDP-3-O-(3-hydroxymyristoyl)-alpha-D-glucosamine + 1 acetate	2.48
3.5.1.116	~no-pathway_3.5.1.116_BR29521	1 S-ureidoglycolate + 1 H2O --> 1 glyoxylate + 1 CO2 + 2 ammonia	0.67	swi: irreversible
3.5.1.16	ornithine-biosynthesis_3.5.1.16_ACETYLORNDEACET-RXN	1 N-acetyl-L-ornithine + 1 H2O --> 1 acetate + 1 L-ornithine	3.08
3.5.1.18	lysine-biosynthesis-I_3.5.1.18_SUCCDIAMINOPIMDESUCC-RXN	1 N-succinyl-L,L-2,6-diaminopimelate + 1 H2O --> 1 succinate + 1 L,L-diaminopimelate	3.24
3.5.1.25	chitin-derivatives-degradation_N-acetylglucosamine-degradation_3.5.1.25_NAG6PDEACET-RXN	1 N-acetyl-D-glucosamine_6-phosphate + 1 H2O --> 1 alpha-D-glucosamine_6-phosphate + 1 acetate	3.08
3.5.1.4	arginine-degradation-X-(arginine-monooxygenase-pathway)_3.5.1.4_GUANIDINOBUTANAMIDE-NH3-RXN	1 4-guanidinobutyramide + 1 H2O --> 1 ammonium + 1 4-guanidinobutyrate	1.6
3.5.1.6	uracil-degradation-I-(reductive)_3.5.1.6_BETA-UREIDOPROPIONASE-RXN	2 H+ + 1 H2O + 1 3-ureidopropionate --> 1 CO2 + 1 ammonium + 1 beta-alanine	1.65
3.5.1.68	histidine-degradation-II_3.5.1.68_N-FORMYLGLUTAMATE-DEFORMYLASE-RXN	1 N-formyl-L-glutamate + 1 H2O --> 1 L-glutamate + 1 formate	2.3
3.5.1.9	~metabolism-of-tryptophan-degradation_3.5.1.9_ARYLFORMAMIDASE-RXN	1 N-formylkynurenine + 1 H2O --> 1 formate + 3 H+ + 1 L-kynurenine	0.73
3.5.2.2	uracil-degradation-I-(reductive)_3.5.2.2_DIHYDROPYRIMIDINASE-RXN	1 H2O + 1 5,6-dihydrouracil <=> 1 H+ + 1 3-ureidopropionate	0.64
3.5.2.3	de-novo-biosynthesis-of-uridine-5'-monophosphate_3.5.2.3_DIHYDROOROT-RXN	1 (S)-dihydroorotate + 1 H2O <=> 1 H+ + 1 N-carbamoyl-L-aspartate	3.15
3.5.2.5	allantoin-degradation-to-ureidoglycolate_3.5.2.5_ALLANTOINASE-RXN	1 H2O + 1 (S)-(+)-allantoin --> 1 H+ + 1 allantoate	0.64	swi: postulated
3.5.2.7	histidine-degradation_3.5.2.7_IMIDAZOLONEPROPIONASE-RXN	1 4-imidazolone-5-propionate + 1 H2O --> 1 N-formimino-L-glutamate	0.64
3.5.3.1	~multiple-pathways_3.5.3.1_ARGINASE-RXN	1 L-arginine + 1 H2O --> 1 urea + 1 L-ornithine	2.57
3.5.3.13	histidine-degradation-II_3.5.3.13_FORMIMINOGLUTAMATE-DEIMINASE-RXN	1 N-formimino-L-glutamate + 1 H2O --> 1 ammonium + 1 N-formyl-L-glutamate	0.87
3.5.3.26	allantoin-degradation-to-glyoxylate_allantoin-degradation-to-ureidoglycolate_3.5.3.26_URUR-RXN	1 S-ureidoglycine + 1 H2O --> 1 S-ureidoglycolate + 1 ammonium	1.6	swi: postulated
3.5.3.7	arginine-degradation_3.5.3.7_GUANIDINOBUTYRASE-RXN	1 4-guanidinobutyrate + 1 H2O --> 1 4-aminobutanoate + 1 urea	2.28
3.5.3.9	allantoin-degradation-to-ureidoglycolate-II-(ammonia-producing)_3.5.3.9_ALLANTOATE-DEIMINASE-RXN	1 H2O + 2 H+ + 1 allantoate --> 1 ammonium + 1 S-ureidoglycine + 1 CO2	0.73
3.5.4.10	~no-pathway_3.5.4.10_2.1.2.3_IMPCYCLOHYDROLASE-RXN	1 IMP + 1 H2O <=> 1 phosphoribosyl-formamido-carboxamide	3.24	swi: reversible
3.5.4.13	~no-pathway_3.5.4.13_3.5.4.5_RXN-14118	1 CTP + 1 H+ + 1 H2O --> 1 UTP + 1 ammonium	1.51
3.5.4.13	de-novo-biosynthesis-of-pyrimidine-deoxyribonucleotides_3.5.4.13_DCTP-DEAM-RXN	1 H2O + 1 dCTP --> 1 dUTP + 1 ammonia	1.51
3.5.4.16	tetrahydrobioprein-biosynthesis_3.5.4.16_GTP-CYCLOHYDRO-I-RXN	1 H2O + 1 GTP --> 1 H+ + 1 formate + 1 7,8-dihydroneopterin_triphosphate	2.57
3.5.4.19	histidine-biosynthesis-I_3.5.4.19_HISTCYCLOHYD-RXN	1 1-(5-phospho-D-ribosyl)-AMP + 1 H2O --> 1 1-(5-phosphoribosyl)-5-[(5-phosphoribosylamino)methylideneamino]imidazole-4-carboxamide	3.08
3.5.4.2	~no-pathway_3.5.4.2_ADENINE-DEAMINASE-RXN	1 adenine + 1 H2O --> 1 ammonia + 1 hypoxanthine	3.24
3.5.4.25	flavin-biosynthesis_3.5.4.25_GTP-CYCLOHYDRO-II-RXN	3 H2O + 1 GTP --> 1 2,5-diamino-6-(5-phospho-D-ribosylamino)pyrimidin-4(3H)-one + 2 H+ + 1 formate + 1 diphosphate	1.72
3.5.4.26	flavin-biosynthesis_3.5.4.26_RIBOFLAVINSYNDEAM-RXN	1 2,5-diamino-6-(5-phospho-D-ribosylamino)pyrimidin-4(3H)-one + 1 H2O --> 1 ammonia + 1 5-amino-6-(5-phospho-D-ribosylamino)uracil	3.15
3.5.4.3	purine-degradation_3.5.4.3_GUANINE-DEAMINASE-RXN	1 guanine + 1 H2O --> 1 xanthine + 1 ammonia	3.24
3.5.4.5	~metabolism-of-pyrimidine_3.5.4.5_CYTIDEAM2-RXN	1 H2O + 1 cytidine --> 1 uridine + 1 ammonia	3.03
3.5.4.5	~metabolism-of-pyrimidine_3.5.4.5_CYTIDEAM-RXN	1 deoxycytidine + 1 H2O --> 1 ammonia + 1 deoxyuridine	3.03
3.5.4.9	~multiple-pathways_3.5.4.9_METHENYLTHFCYCLOHYDRO-RXN	1 5,10-methenyltetrahydrofolate + 1 H2O <=> 1 H+ + 1 10-formyl-tetrahydrofolate	3.24	swi: reversible
3.6.1.-	~no-pathway_3.6.1.-_DIHYDRONEOPTERIN-MONO-P-DEPHOS-RXN	1 7,8-dihydroneopterin_3'-phosphate + 1 H2O --> 1 phosphate + 1 7,8-dihydro-D-neopterin	0.67
3.6.1.-	~no-pathway_3.6.1.-_H2NEOPTERINP3PYROPHOSPHOHYDRO-RXN	1 7,8-dihydroneopterin_triphosphate + 1 H2O --> 1 diphosphate + 1 7,8-dihydroneopterin_3'-phosphate + 1 H+	0.67
3.6.1.1	~no-pathway_3.6.1.1_INORGPYROPHOSPHAT-RXN	1 diphosphate + 1 H2O --> 1 H+ + 2 phosphate	0.64
3.6.1.23	de-novo-biosynthesis-of-pyrimidine-deoxyribonucleotides_3.6.1.19_3.6.1.23_DUTP-PYROP-RXN	1 dUTP + 1 H2O --> 1 H+ + 1 diphosphate + 1 dUMP	0.64
3.6.1.27	~no-pathway_3.6.1.27_UNDECAPRENYL-DIPHOSPHATASE-RXN	1 H2O + 1 di-trans,octa-cis-undecaprenyl_diphosphate --> 1 H+ + 1 phosphate + 1 di-trans,octa-cis-undecaprenyl_phosphate	3.24
3.6.1.31	histidine-biosynthesis-I_3.6.1.31_HISTPRATPHYD-RXN	1 phosphoribosyl-ATP + 1 H2O --> 1 H+ + 1 diphosphate + 1 1-(5-phospho-D-ribosyl)-AMP	3.08
3.6.1.40	ppGpp-biosynthesis_3.6.1.11_3.6.1.40_PPPGPPHYDRO-RXN	1 H2O + 1 pppGpp --> 1 H+ + 1 phosphate + 1 ppGpp	1.51
3.6.1.54	lipid-IVA-biosynthesis_3.6.1.54_LIPIDXSYNTHESIS-RXN	1 H2O + 1 UDP-2,3-bis[O-(3R)-3-hydroxymyristoyl]-alpha-D-glucosamine --> 2 H+ + 1 UMP + 1 2,3-bis[(3R)-3-hydroxymyristoyl]-alpha-D-glucosaminyl_1-phosphate	0.73
3.6.1.66	~no-pathway_3.6.1.19_DCTP-PYROPHOSPHATASE-RXN	1 H2O + 1 dCTP --> 1 diphosphate + 1 H+ + 1 dCMP	2.57
3.6.1.66	~no-pathway_3.6.1.19_RXN0-1603	1 XTP + 1 H2O --> 1 H+ + 1 XMP + 1 diphosphate	2.57
3.6.1.66	~no-pathway_3.6.1.19_RXN0-383	1 CTP + 1 H2O --> 1 CMP + 1 diphosphate + 1 H+	2.57
3.6.1.66	~no-pathway_3.6.1.19_RXN0-384	1 dATP + 1 H2O --> 1 H+ + 1 diphosphate + 1 dAMP	2.57
3.6.1.66	~no-pathway_3.6.1.19_RXN0-385	1 dGTP + 1 H2O --> 1 H+ + 1 diphosphate + 1 dGMP	2.57
3.6.1.66	~no-pathway_3.6.1.19_RXN0-5107	1 dTTP + 1 H2O --> 1 H+ + 1 dTMP + 1 diphosphate	2.57
3.6.1.66	~no-pathway_3.6.1.19_RXN0-6382	1 ITP + 1 H2O --> 1 H+ + 1 diphosphate + 1 IMP	2.57
3.6.1.66	~no-pathway_3.6.1.19_RXN-14140	1 GTP + 1 H2O --> 1 diphosphate + 1 H+ + 1 GMP	2.57
3.6.1.66	~no-pathway_3.6.1.19_RXN-14215	1 H2O + 1 dADP --> 1 H+ + 1 phosphate + 1 dAMP	2.57
3.7.1.2	tyrosine-degradation-I_3.7.1.2_FUMARYLACETOACETASE-RXN	1 4-fumaryl-acetoacetate + 1 H2O --> 1 fumarate + 1 H+ + 1 acetoacetate	3.24
3.7.1.22	myo-inositol-degradation-I_3.7.1.22_RXN-14149	1 H2O + 1 3D-(3,5_4)-trihydroxycyclohexane-1,2-dione --> 1 H+ + 1 5-deoxy-D-glucuronate	1.81
3.7.1.3	tryptophan-degradation_3.7.1.3_KYNURENINASE-RXN	1 L-kynurenine + 1 H2O --> 1 L-alanine + 1 H+ + 1 anthranilate	3.24
4.1.1.-	ubiquinol-10-biosynthesis-(prokaryotic)_4.1.1.-_RXN-9231	1 3-decaprenyl-4-hydroxybenzoate + 1 H+ --> 1 2-decaprenylphenol + 1 CO2	0	swi: postulated
4.1.1.17	~multiple-pathways_4.1.1.18_LYSDECARBOX-RXN	1 L-lysine + 1 H+ --> 1 CO2 + 1 cadaverine	1.6
4.1.1.17	putrescine-biosynthesis_superpathway-of-ornithine-degradation_4.1.1.17_ORNDECARBOX-RXN	: 1 L-ornithine + 1 H+ --> 1 putrescine + 1 CO2	1.6
4.1.1.20	lysine-biosynthesis_4.1.1.20_DIAMINOPIMDECARB-RXN	1 meso-diaminopimelate + 1 H+ --> 1 L-lysine + 1 CO2	3.24
4.1.1.23	de-novo-biosynthesis-of-uridine-5'-monophosphate_4.1.1.23_OROTPDECARB-RXN	1 orotidine-5'-phosphate + 1 H+ --> 1 CO2 + 1 UMP	3.15	swi : adapted; UMP
4.1.1.36	coenzyme-A-biosynthesis_4.1.1.36_P-PANTOCYSDECARB-RXN	1 H+ + 1 R-4'-phosphopantothenoyl-L-cysteine --> 1 4'-phosphopantetheine + 1 CO2	3.15
4.1.1.48	tryptophan-biosynthesis_4.1.1.48_IGPSYN-RXN	1 H+ + 1 1-(o-carboxyphenylamino)-1'-deoxyribulose-5'-phosphate --> 1 (1S,2R)-1-C-(indol-3-yl)glycerol_3-phosphate + 1 H2O + 1 CO2	3.24
4.1.1.49	superpathway-of-glyoxylate-cycle_gluconeogenesis_4.1.1.49_PEPCARBOXYKIN-RXN	1 ATP + 1 oxaloacetate --> 1 CO2 + 1 ADP + 1 phosphoenolpyruvate	3.24
4.1.1.65	phosphatidylethanolamine-biosynthesis-I_4.1.1.65_PHOSPHASERDECARB-RXN	1 L-1-phosphatidylserine + 1 H+ --> 1 CO2 + 1 L-1-phosphatidylethanolamine	1.65	swi: adapted
4.1.2.13	glycolysis_4.1.2.13_F16ALDOLASE-RXN	1 fructose-1,6-bisphosphate <=> 1 dihydroxyacetone_phosphate + 1 D-glyceraldehyde-3-phosphate	1.6
4.1.2.14	Entner-Doudoroff-pathway_4.1.2.14_KDPGALDOL-RXN	1 2-dehydro-3-deoxy-D-gluconate-6-phosphate --> 1 D-glyceraldehyde-3-phosphate + 1 pyruvate	0.64
4.1.2.25	~no-pathway_4.1.2.25_H2NEOPTERINALDOL-RXN	1 7,8-dihydro-D-neopterin --> 1 6-hydroxymethyl-7,8-dihydropterin + 1 glycolaldehyde	1.51
4.1.2.29	myo-inositol-degradation-I_4.1.2.29_4.1.2.29-RXN	1 5-dehydro-2-deoxy-D-gluconate_6-phosphate --> 1 dihydroxyacetone_phosphate + 1 malonate_semialdehyde	0.73
4.1.2.5	~no-pathway_4.1.2.5_LTAA-RXN	1 L-threonine → 1 glycine + 1 acetaldehyde	1.31	swi: irreversible
4.1.3.-	histidine-biosynthesis-I_4.1.3.-_2.4.2.-_GLUTAMIDOTRANS-RXN	1 phosphoribulosylformimino-AICAR-P + 1 L-glutamine --> 1 D-erythro-imidazole-glycerol-phosphate + 1 L-glutamate + 1 H+ + 1 aminoimidazole_carboxamide_ribonucleotide	0.67
4.1.3.24	glyoxylate-assimilation_ethylmalonyl-pathway_4.1.3.24_RXN-8961	1 beta-methylmalyl-CoA <=> 1 glyoxylate + 1 propanoyl-CoA	2.76
4.1.3.27	tryptophan-biosynthesis_4.1.3.27_ANTHRANSYN-RXN	1 chorismate + 1 L-glutamine <=> 1 H+ + 1 pyruvate + 1 L-glutamate + 1 anthranilate	3.15
4.1.3.38	~no-pathway_4.1.3.38_ADCLY-RXN	1 4-amino-4-deoxychorismate <=> 1 pyruvate + 1 4-aminobenzoate + 1 H+	1.51
4.1.3.4	~multiple-pathways_4.1.3.4_HYDROXYMETHYLGLUTARYL-COA-LYASE-RXN	1 (S)-3-hydroxy-3-methylglutaryl-CoA --> 1 acetoacetate + 1 acetyl-CoA	3.15
4.1.3.40	ubiquinol-8-biosynthesis_4-hydroxybenzoate-biosynthesis_4.1.3.40_CHORPYRLY-RXN	1 chorismate --> 1 pyruvate + 1 4-hydroxybenzoate	0	swi: postulated
4.1.99.12	flavin-biosynthesis_4.1.99.12_DIOHBUTANONEPSYN-RXN	1 D-ribulose-5-phosphate --> 1 1-deoxy-L-glycero-tetrulose_4-phosphate + 1 H+ + 1 formate	3.15
4.2.1.1	~no-pathway_4.2.1.1_CARBODEHYDRAT-RXN	1 bicarbonate <=> 1 CO2 + 1 H2O	3.03
4.2.1.10	quinate-degradation_4.2.1.10_3-DEHYDROQUINATE-DEHYDRATASE-RXN	1 3-dehydroquinate <=> 1 H2O + 1 3-dehydroshikimate	4.03
4.2.1.11	glycolysis_4.2.1.11_2PGADEHYDRAT-RXN	1 2-phospho-D-glycerate <=> 1 phosphoenolpyruvate + 1 H2O	3.24
4.2.1.116	~multiple-pathways_4.2.1.116_RXN-6383	1 3-hydroxypropanoyl-CoA <=> 1 H2O + 1 acryloyl-CoA	0.73
4.2.1.12	Entner-Doudoroff-pathway-I_4.2.1.12_PGLUCONDEHYDRAT-RXN	1 6-phospho-D-gluconate --> 1 H2O + 1 2-dehydro-3-deoxy-D-gluconate-6-phosphate	3.24
4.2.1.17	~multiple-pathways_4.2.1.55_4.2.1.17_RXN-11667	1 (S)-3-hydroxybutanoyl-CoA <=> 1 crotonyl-CoA + 1 H2O	2.67
4.2.1.17	isoleucine-degradation_2-methylbutyrate-biosynthesis_4.2.1.17_TIGLYLCOA-HYDROXY-RXN	1 2-methyl-3-hydroxybutyryl-CoA <=> 1 (E)-2-methylcrotonoyl-CoA + 1 H2O	2.67
4.2.1.17	phenylacetate-degradation-I-(aerobic)_4.2.1.17_RXN0-6513	1 3-hydroxyadipyl-CoA <=> 1 2,3-didehydroadipyl-CoA + 1 H2O	2.67
4.2.1.17	valine-degradation-I_4.2.1.17_METHYLACYLYLCOA-HYDROXY-RXN	1 (S)-3-hydroxy-isobutanoyl-CoA <=> 1 methylacrylyl-CoA + 1 H2O	2.67
4.2.1.18	leucine-degradation-I_4.2.1.18_METHYLGLUTACONYL-COA-HYDRATASE-RXN	1 (S)-3-hydroxy-3-methylglutaryl-CoA <=> 1 3-methylglutaconyl-CoA + 1 H2O	0.73
4.2.1.19	histidine-biosynthesis-I_4.2.1.19_IMIDPHOSDEHYD-RXN	1 D-erythro-imidazole-glycerol-phosphate --> 1 H2O + 1 imidazole_acetol-phosphate	3.24
4.2.1.2	TCA-cycle_4.2.1.2_FUMHYDR-RXN	1 (S)-malate <=> 1 fumarate + 1 H2O	0.64
4.2.1.20	IAA-biosynthesis_tryptophan-biosynthesis_4.2.1.20_RXN0-2381	1 (1S,2R)-1-C-(indol-3-yl)glycerol_3-phosphate <=> 1 D-glyceraldehyde-3-phosphate + 1 indole	3.24
4.2.1.20	tryptophan-biosynthesis_4.2.1.20_RXN0-2382	1 indole + 1 L-serine --> 1 L-tryptophan + 1 H2O	3.24
4.2.1.3	TCA-cycle_4.2.1.3_ACONITATEDEHYDR-RXN	1 citrate <=> 1 cis-aconitate + 1 H2O	3.24
4.2.1.3	TCA-cycle_4.2.1.3_ACONITATEHYDR-RXN	1 cis-aconitate + 1 H2O <=> 1 D-threo-isocitrate	3.24
4.2.1.33	leucine_metabolism-4.2.1.33-RXN-8991	1 (2R,3S)-3-isopropylmalate <-- 1 2-isopropylmaleate + 1 H2O	3.24	swi: manual; DFL12
4.2.1.33	leucine-biosynthesis_4.2.1.33_3-ISOPROPYLMALISOM-RXN	1 (2S)-2-isopropylmalate --> 1 2-isopropylmaleate + 1 H2O	3.24
4.2.1.44	myo-inositol-degradation-I_4.2.1.44_MYO-INOSOSE-2-DEHYDRATASE-RXN	1 scyllo-inosose --> 1 3D-(3,5_4)-trihydroxycyclohexane-1,2-dione + 1 H2O	0.64
4.2.1.49	histidine-degradation_4.2.1.49_UROCANATE-HYDRATASE-RXN	1 4-imidazolone-5-propionate <-- 1 urocanate + 1 H2O	4.19
4.2.1.51	phenylalanine-biosynthesis-I_4.2.1.51_PREPHENATEDEHYDRAT-RXN	1 prephenate + 1 H+ --> 1 keto-phenylpyruvate + 1 CO2 + 1 H2O	0.64
4.2.1.55	acetyl-CoA-fermentation-to-butyrate_ethylmalonyl-pathway_4.2.1.55_1.1.1.36_4.2.1.17_3-HYDROXBUTYRYL-COA-DEHYDRATASE-RXN	1 (R)-3-hydroxybutanoyl-CoA --> 1 H2O + 1 crotonyl-CoA	1.6
4.2.1.59	cis-dodecenoyl-biosynthesis_4.2.1.59_RXN0-2144	1 (3R)-hydroxy-cis-D5-dodecenoyl-[ACP] --> 1 H2O + 1 trans-D3-cis-D5-dodecenoyl-[ACP]	2.48	swi: adapted
4.2.1.59	cis-dodecenoyl-biosynthesis_palmitate-biosynthesis_4.2.1.59_RXN-9655	1 (R)-3-hydroxy-decanoyl-[ACP] --> 1 trans-D2-decenoyl-[ACP] + 1 H2O	2.48	swi: adapted
4.2.1.59	cis-vaccenate-biosynthesis_4.2.1.59_RXN-9557	1 (R)-3-hydroxy-cis-vaccenoyl-[ACP] --> 1 H2O + 1 cis-vaccen-2-enoyl-[ACP]	2.48	swi: adapted
4.2.1.59	palmitate-biosynthesis_4.2.1.59_4.2.1.58-RXN	1 (R)-3-hydroxy-butanoyl-[ACP] --> 1 trans-D2-butenoyl-[ACP] + 1 H2O	2.48	swi: adapted
4.2.1.59	palmitate-biosynthesis_4.2.1.59_4.2.1.59-RXN	1 (R)-3-hydroxy-octanoyl-[ACP] --> 1 trans-D2-octenoyl-[ACP] + 1 H2O	2.48	swi: adapted
4.2.1.59	palmitate-biosynthesis_4.2.1.59_4.2.1.61-RXN	1 (R)-3-hydroxy-hexadecanoyl-[ACP] --> 1 H2O + 1 trans-D2-hexadecenoyl-[ACP]	2.48	swi: adapted
4.2.1.59	palmitate-biosynthesis_4.2.1.59_RXN-9520	1 (R)-3-hydroxy-hexanoyl-[ACP] --> 1 trans-D2-hexenoyl-[ACP] + 1 H2O	2.48	swi: adapted
4.2.1.59	palmitate-biosynthesis_4.2.1.59_RXN-9533	1 (R)-3-hydroxy-dodecanoyl-[ACP] --> 1 H2O + 1 trans-D2-dodecenoyl-[ACP]	2.48	swi: adapted
4.2.1.59	palmitate-biosynthesis_4.2.1.59_RXN-9537	1 (R)-3-hydroxy-tetradecanoyl-[ACP] --> 1 H2O + 1 trans-D2-tetradecenoyl-[ACP]	2.48	swi: adapted
4.2.1.59	palmitoleate-biosynthesis-I_4.2.1.59_RXN-10656	1 (3R)-hydroxy-cis-D7-tetradecenoyl-[ACP] --> 1 trans-D3-cis-D7-tetradecenoyl-[ACP] + 1 H2O	2.48	swi: adapted
4.2.1.59	palmitoleate-biosynthesis-I_4.2.1.59_RXN-10660	1 (3R)-hydroxy-cis-D9-hexaecenoyl-[ACP] --> 1 H2O + 1 trans-D3-cis-D9-hexadecenoyl-[ACP]	2.48	swi: adapted
4.2.1.59	stearate-biosynthesis_4.2.1.59_RXN-9634	1 (R)-3-hydroxy-octadecanoyl-[ACP] --> 1 H2O + 1 trans-D2-octadecenoyl-[ACP]	2.48	swi: adapted
4.2.1.9	isoleucine-biosynthesis-from-threonine_isoleucine-biosynthesis_4.2.1.9_DIHYDROXYMETVALDEHYDRAT-RXN	1 2,3-dihydroxy-3-methylvalerate --> 1 H2O + 1 2-keto-3-methyl-valerate	0.78
4.2.1.9	valine-biosynthesis_4.2.1.9_DIHYDROXYISOVALDEHYDRAT-RXN	1 (R)-2,3-dihydroxy-3-methylbutanoate --> 1 H2O + 1 2-oxoisovalerate	0.78
4.2.3.1	threonine-biosynthesis-from-homoserine_4.2.3.1_THRESYN-RXN	1 O-phospho-L-homoserine + 1 H2O --> 1 L-threonine + 1 phosphate	3.24
4.2.3.4	~no-pathway_4.2.3.4_3-DEHYDROQUINATE-SYNTHASE-RXN	1 3-deoxy-D-arabino-heptulosonate-7-phosphate --> 1 3-dehydroquinate + 1 phosphate	2.57
4.2.3.5	~no-pathway_4.2.3.5_CHORISMATE-SYNTHASE-RXN	1 5-enolpyruvyl-shikimate-3-phosphate --> 1 chorismate + 1 phosphate	4.19
4.3.1.12	arginine-degradation_ornithine-degradation_4.3.1.12_ORNITHINE-CYCLODEAMINASE-RXN	1 L-ornithine --> 1 L-proline + 1 ammonium	3.32
4.3.1.17	~metabolism-of-degradation_4.3.1.17_4.3.1.17-RXN	1 L-serine --> 1 ammonium + 1 pyruvate	3.24
4.3.1.19	isoleucine-biosynthesis-from-threonine_threonine-degradation_4.3.1.19_THREDEHYD-RXN	1 L-threonine --> 1 H+ + 1 2-oxobutanoate + 1 ammonia	3.15
4.3.1.28	~no-pathway_4.3.1.28_RXN-13654	1 L-lysine <=> 1 L-pipecolate + 1 ammonium	0	based on metabolome data
4.3.1.3	histidine-degradation_4.3.1.3_HISTIDINE-AMMONIA-LYASE-RXN	1 L-histidine --> 1 urocanate + 1 ammonium	3.24
4.3.2.1	~multiple-pathways_4.3.2.1_ARGSUCCINLYA-RXN	1 L-arginino-succinate <=> 1 fumarate + 1 L-arginine	3.24
4.3.2.2	~no-pathway_4.3.2.2_AICARSYN-RXN	1 5'-phosphoribosyl-4-(N-succinocarboxamide)-5-aminoimidazole <=> 1 aminoimidazole_carboxamide_ribonucleotide + 1 fumarate	4.19
4.3.2.2	purine-nucleotides-de-novo-biosynthesis-II_4.3.2.2_AMPSYN-RXN	1 adenylo-succinate <=> 1 fumarate + 1 AMP	4.19
4.3.2.3	allantoin-degradation-to-glyoxylate_4.3.2.3_UREIDOGLYCOLATE-LYASE-RXN	1 S-ureidoglycolate --> 1 urea + 1 glyoxylate	0.64
4.3.3.7	lysine-biosynthesis_4.3.3.7_DIHYDRODIPICSYN-RXN	1 L-aspartate-semialdehyde + 1 pyruvate --> 1 H2O + 1 H+ + 1 (2S,4S)-4-hydroxy-2,3,4,5-tetrahydrodipicolinate	0.73	swi: manual, irreversible; metacyc
4.4.1.1	L-cysteine-degradation-II_4.4.1.1_LCYSDESULF-RXN	1 H2O + 1 L-cysteine --> 1 hydrogen_sulfide + 1 pyruvate + 1 ammonium	0.78
4.4.1.11	methionine-degradation-II_4.4.1.11_METHIONINE-GAMMA-LYASE-RXN	1 L-methionine + 1 H2O <=> 1 methanethiol + 1 ammonium + 1 2-oxobutanoate	3.24
4.4.1.13	methionine-biosynthesis_homocysteine-and-cysteine-interconversion_4.4.1.8_CYSTATHIONINE-BETA-LYASE-RXN	1 H2O + 1 L-cystathionine --> 1 L-homocysteine + 1 ammonia + 1 H+ + 1 pyruvate	0.85	swi: irreversible
4.6.1.12	methylerythritol-phosphate-pathway_4.6.1.12_RXN0-302	1 2-phospho-4-(cytidine_5'-diphospho)-2-C-methyl-D-erythritol --> 1 CMP + 1 2-C-methyl-D-erythritol-2,4-cyclodiphosphate	3.52
5.1.1.1	alanine-degradation_alanine-biosynthesis_5.1.1.1_ALARACECAT-RXN	1 L-alanine <=> 1 D-alanine	3.24
5.1.1.3	UDP-N-acetylmuramoyl-pentapeptide-biosynthesis_5.1.1.3_GLUTRACE-RXN	1 L-glutamate <=> 1 D-glutamate	0.64
5.1.1.7	lysine-biosynthesis_5.1.1.7_DIAMINOPIMEPIM-RXN	1 L,L-diaminopimelate <=> 1 meso-diaminopimelate	3.15
5.1.2.3	~no-pathway_5.1.2.3_5.1.2.3-RXN	1 (S)-3-hydroxybutanoyl-CoA <=> 1 (R)-3-hydroxybutanoyl-CoA	0.73
5.1.3.1	~multiple-pathways_5.1.3.1_RIBULP3EPIM-RXN	1 D-ribulose-5-phosphate <=> 1 D-xylulose-5-phosphate	3.24
5.1.99.1	~multiple-pathways_5.1.99.1_METHYLMALONYL-COA-EPIM-RXN	1 (R)-methylmalonyl-CoA <=> 1 (S)-methylmalonyl-CoA	3.15
5.2.1.2	tyrosine-degradation-I_5.2.1.2_MALEYLACETOACETATE-ISOMERASE-RXN	1 4-maleyl-acetoacetate --> 1 4-fumaryl-acetoacetate	0.64
5.3.1.1	glycolysis_5.3.1.1_TRIOSEPISOMERIZATION-RXN	1 D-glyceraldehyde-3-phosphate <=> 1 dihydroxyacetone_phosphate	4.19
5.3.1.13	CMP-KDO-biosynthesis-I_5.3.1.13_DARAB5PISOM-RXN	1 D-arabinose_5-phosphate <=> 1 D-ribulose_5-phosphate	3.15
5.3.1.16	histidine-biosynthesis-I_5.3.1.16_PRIBFAICARPISOM-RXN	1 1-(5-phosphoribosyl)-5-[(5-phosphoribosylamino)methylideneamino]imidazole-4-carboxamide --> 1 phosphoribulosylformimino-AICAR-P	0.64
5.3.1.24	tryptophan-biosynthesis_5.3.1.24_PRAISOM-RXN	1 N-(5'-phosphoribosyl)-anthranilate --> 1 1-(o-carboxyphenylamino)-1'-deoxyribulose-5'-phosphate	3.15
5.3.1.30	myo-inositol-degradation-I_5.3.1.30_RXN-14150	1 5-deoxy-D-glucuronate <=> 1 2-deoxy-5-dehydro-D-gluconate	1.6
5.3.1.5	xylose-degradation-I_5.3.1.5_XYLISOM-RXN	1 D-xylose <=> 1 D-xylulose	3.24	swi: adapted
5.3.1.6	~multiple-pathways_5.3.1.6_RIB5PISOM-RXN	1 D-ribose-5-phosphate <=> 1 D-ribulose-5-phosphate	3.24
5.3.1.9	glycolysis_5.3.1.9_PGLUCISOM-RXN	1 beta-D-glucose-6-phosphate <=> 1 D-fructose-6-phosphate	3.24
5.3.3.14	cis-dodecenoyl-biosynthesis_5.3.3.14_5.3.3.14-RXN	1 trans-D2-decenoyl-[ACP] --> 1 cis-D3-decenoyl-[ACP]	1.65	swi: adapted
5.3.3.18	phenylacetate-degradation-I-(aerobic)_5.3.3.18_RXN0-6510	1 2-(1,2-epoxy-1,2-dihydrophenyl)acetyl-CoA <=> 1 2-oxepin-2(3H)-ylideneacetyl-CoA	1.65
5.3.3.2	~multiple-pathways_5.3.3.2_IPPISOM-RXN	1 isopentenyl_diphosphate <=> 1 dimethylallyl_diphosphate	3.15
5.4.2.10	CMP-legionaminate-biosynthesis_UDP-N-acetyl-D-glucosamine-biosynthesis_5.4.2.10_5.4.2.10-RXN	1 D-glucosamine_1-phosphate <=> 1 alpha-D-glucosamine_6-phosphate	3.24
5.4.2.12	glycolysis_5.4.2.12_3PGAREARR-RXN	1 3-phospho-D-glycerate <=> 1 2-phospho-D-glycerate	0.64
5.4.2.2	~multiple-pathways_5.4.2.2_PHOSPHOGLUCMUT-RXN	1 alpha-D-glucose_1-phosphate <=> 1 alpha-D-glucose_6-phosphate	3.08
5.4.2.7	PRPP-biosynthesis-II_5.4.2.7_PPENTOMUT-RXN	1 alpha-D-ribose-1-phosphate <=> 1 D-ribose-5-phosphate	3.24
5.4.99.18	~no-pathway_5.4.99.18_RXN0-743	1 N5-carboxyaminoimidazole_ribonucleotide --> 1 5-amino-1-(5-phospho-D-ribosyl)imidazole-4-carboxylate	2.41
5.4.99.2	~multiple-pathways_5.4.99.2_METHYLMALONYL-COA-MUT-RXN	1 (R)-methylmalonyl-CoA <=> 1 succinyl-CoA	2.37
5.4.99.2	ethylmalonyl-pathway_5.4.99.2_RXN-8958	1 (2S)-ethylmalonyl-CoA --> 1 methylsuccinyl-CoA	2.37
5.4.99.5	phenylalanine-biosynthesis_tyrosine-biosynthesis_5.4.99.5_CHORISMATEMUT-RXN	1 chorismate <=> 1 prephenate	0.73
6.1.1.-	~no-pathway_6.1.1.-_RXN490-3616	1 L-aspartate + 1 |ASN-tRNAs| + 1 ATP --> 1 diphosphate + 1 |L-aspartyl-tRNAAsn| + 1 AMP	1.72
6.2.1.1	~multiple-pathways_6.2.1.1_ACETATE--COA-LIGASE-RXN	1 acetate + 1 ATP + 1 coenzyme_A --> 1 acetyl-CoA + 1 diphosphate + 1 AMP	2.57
6.2.1.2	methyl-ketone-biosynthesis_6.2.1.2_BS143	1 n-butanoate + 1 coenzyme_A + 1 ATP --> 1 AMP + 1 diphosphate + 1 butanoyl-CoA	0.64
6.2.1.30	phenylacetate-degradation_phenylalanine-degradation_6.2.1.30_RXN-10819	1 coenzyme_A + 1 phenylacetate + 1 ATP --> 1 diphosphate + 1 AMP	3.24
6.2.1.32	~multiple-pathways_6.2.1.32_AMINOBENZCOALIG-RXN	1 ATP + 1 anthranilate + 1 coenzyme_A --> 1 diphosphate + 1 2-aminobenzoyl-CoA + 1 AMP	1.65
6.2.1.5	TCA-cycle_6.2.1.5_SUCCCOASYN-RXN	1 coenzyme_A + 1 ATP + 1 succinate <=> 1 ADP + 1 succinyl-CoA + 1 phosphate	4.19
6.3.1.2	glutamine-biosynthesis_nitrate-reduction_6.3.1.2_GLUTAMINESYN-RXN	1 ATP + 1 ammonia + 1 L-glutamate --> 1 ADP + 1 phosphate + 1 L-glutamine	3.24
6.3.2.1	phosphopantothenate-biosynthesis-I_6.3.2.1_PANTOATE-BETA-ALANINE-LIG-RXN	1 ATP + 1 (R)-pantoate + 1 beta-alanine --> 1 (R)-pantothenate + 1 diphosphate + 1 AMP + 1 H+	3.24
6.3.2.10	UDP-N-acetylmuramoyl-pentapeptide-biosynthesis-III-(meso-DAP-containing)_6.3.2.10_UDP-NACMURALGLDAPAALIG-RXN	1 ATP + 1 UDP-N-acetylmuramoyl-L-alanyl-gamma-D-glutamyl-meso-2,6-diaminopimelate + 1 D-alanyl-D-alanine --> 1 ADP + 1 UDP-N-acetylmuramoyl-L-alanyl-gamma-D-glutamyl-meso-2,6-diaminopimelyl-D-alanyl-D-alanine + 1 H+ + 1 phosphate	3.08
6.3.2.12	formylTHF-biosynthesis-I_6.3.2.12_DIHYDROFOLATESYNTH-RXN	1 L-glutamate + 1 ATP + 1 7,8-dihydropteroate --> 1 ADP + 1 H+ + 1 phosphate + 1 7,8-dihydrofolate	1.6
6.3.2.13	UDP-N-acetylmuramoyl-pentapeptide-biosynthesis-III-(meso-DAP-containing)_6.3.2.13_UDP-NACMURALGLDAPLIG-RXN	1 ATP + 1 meso-diaminopimelate + 1 UDP-N-acetylmuramoyl-L-alanyl--D-glutamate --> 1 phosphate + 1 ADP + 1 UDP-N-acetylmuramoyl-L-alanyl-gamma-D-glutamyl-meso-2,6-diaminopimelate + 1 H+	3.24
6.3.2.2	~metabolism-of-biosynthesis_6.3.2.2_GLUTCYSLIG-RXN	1 L-cysteine + 1 ATP + 1 L-glutamate --> 1 H+ + 1 L-gamma-glutamylcysteine + 1 phosphate + 1 ADP	3.24
6.3.2.3	glutathione-biosynthesis_6.3.2.3_GLUTATHIONE-SYN-RXN	1 glycine + 1 L-gamma-glutamylcysteine + 1 ATP --> 1 ADP + 1 phosphate + 1 glutathione + 1 H+	3.24
6.3.2.4	UDP-N-acetylmuramoyl-pentapeptide-biosynthesis_6.3.2.4_DALADALALIG-RXN	1 ATP + 2 D-alanine --> 1 phosphate + 1 H+ + 1 ADP + 1 D-alanyl-D-alanine	3.24
6.3.2.5	coenzyme-A-biosynthesis_6.3.2.5_P-PANTOCYSLIG-RXN	1 L-cysteine + 1 D-4'-phosphopantothenate + 1 CTP --> 1 diphosphate + 1 H+ + 1 R-4'-phosphopantothenoyl-L-cysteine + 1 CMP	3.15
6.3.2.6	~no-pathway_6.3.2.6_SAICARSYN-RXN	1 ATP + 1 5-amino-1-(5-phospho-D-ribosyl)imidazole-4-carboxylate + 1 L-aspartate --> 1 H+ + 1 ADP + 1 phosphate + 1 5'-phosphoribosyl-4-(N-succinocarboxamide)-5-aminoimidazole	4.19
6.3.2.8	UDP-N-acetylmuramoyl-pentapeptide-biosynthesis_6.3.2.8_UDP-NACMUR-ALA-LIG-RXN	1 UDP-N-alpha-D-acetylmuramate + 1 L-alanine + 1 ATP --> 1 H+ + 1 phosphate + 1 ADP + 1 UDP-N-acetylmuramoyl-L-alanine	3.24
6.3.2.9	UDP-N-acetylmuramoyl-pentapeptide-biosynthesis_6.3.2.9_UDP-NACMURALA-GLU-LIG-RXN	1 UDP-N-acetylmuramoyl-L-alanine + 1 ATP + 1 D-glutamate --> 1 H+ + 1 phosphate + 1 ADP + 1 UDP-N-acetylmuramoyl-L-alanyl--D-glutamate	3.24
6.3.3.1	~no-pathway_6.3.3.1_AIRS-RXN	1 ATP + 1 5-phosphoribosyl-N-formylglycineamidine --> 1 H+ + 1 phosphate + 1 ADP + 1 5-amino-1-(5-phospho-D-ribosyl)imidazole	0.73
6.3.4.13	~no-pathway_6.3.4.13_GLYRIBONUCSYN-RXN	1 glycine + 1 5-phospho-beta-D-ribosyl-amine + 1 ATP --> 1 ADP + 1 H+ + 1 5-phospho-ribosyl-glycineamide + 1 phosphate	3.24
6.3.4.18	~no-pathway_6.3.4.18_RXN0-742	1 ATP + 1 5-amino-1-(5-phospho-D-ribosyl)imidazole + 1 bicarbonate --> 2 H+ + 1 phosphate + 1 N5-carboxyaminoimidazole_ribonucleotide + 1 ADP	2.57
6.3.4.2	pyrimidine-ribonucleotides-interconversion_6.3.4.2_CTPSYN-RXN	1 H2O + 1 ATP + 1 UTP + 1 L-glutamine --> 2 H+ + 1 ADP + 1 CTP + 1 L-glutamate + 1 phosphate	4.19
6.3.4.3	~multiple-pathways_6.3.4.3_FORMATETHFLIG-RXN	1 tetrahydrofolate + 1 formate + 1 ATP --> 1 10-formyl-tetrahydrofolate + 1 ADP + 1 phosphate	3.24	#swi: irreversible
6.3.4.4	purine-nucleotides-de-novo-biosynthesis-II_6.3.4.4_ADENYLOSUCCINATE-SYNTHASE-RXN	1 L-aspartate + 1 GTP + 1 IMP --> 1 GDP + 1 phosphate + 2 H+ + 1 adenylo-succinate	0.64
6.3.4.5	~multiple-pathways_6.3.4.5_ARGSUCCINSYN-RXN	1 L-aspartate + 1 L-citrulline + 1 ATP --> 1 diphosphate + 1 L-arginino-succinate + 1 H+ + 1 AMP	3.24
6.3.5.1	~multiple-pathways_6.3.5.1_NAD-SYNTH-GLN-RXN	1 H2O + 1 nicotinate_adenine_dinucleotide + 1 ATP + 1 L-glutamine --> 1 L-glutamate + 1 NAD+ + 1 AMP + 1 H+ + 1 diphosphate	2.37
6.3.5.2	purine-nucleotides-de-novo-biosynthesis-II_6.3.5.2_GMP-SYN-GLUT-RXN	1 XMP + 1 H2O + 1 ATP + 1 L-glutamine --> 1 L-glutamate + 1 diphosphate + 1 AMP + 2 H+ + 1 GMP	0.64
6.3.5.3	~no-pathway_6.3.5.3_FGAMSYN-RXN	1 ATP + 1 L-glutamine + 1 5'-phosphoribosyl-N-formylglycineamide + 1 H2O --> 1 H+ + 1 ADP + 1 phosphate + 1 5-phosphoribosyl-N-formylglycineamidine + 1 L-glutamate	3.24
6.3.5.5	de-novo-biosynthesis-of-uridine-5'-monophosphate_arginine-biosynthesis_6.3.5.5_CARBPSYN-RXN	2 ATP + 1 L-glutamine + 1 H2O + 1 bicarbonate --> 1 phosphate + 2 ADP + 2 H+ + 1 L-glutamate + 1 carbamoyl-phosphate	3.24
6.3.5.6	~no-pathway_6.3.5.6_6.3.5.6-RXN	1 L-glutamine + 1 |L-aspartyl-tRNAAsn| + 1 H2O + 1 ATP --> 1 L-glutamate + 1 |Charged-ASN-tRNAs| + 2 H+ + 1 phosphate + 1 ADP	1.81
6.4.1.1	anapleurotic_synthesis_of_oxalacetate-6.4.1.1-PYRUVATE-CARBOXYLASE-RXN	1 ATP + 1 bicarbonate + 1 pyruvate --> 1 ADP + 1 oxaloacetate + 1 phosphate + 1 H+	2.57	#swi: manual; DFL12
6.4.1.2	~multiple-pathways_6.4.1.2_ACETYL-COA-CARBOXYLTRANSFER-RXN	1 bicarbonate + 1 ATP + 1 acetyl-CoA --> 1 malonyl-CoA + 1 H+ + 1 phosphate + 1 ADP	1.54
6.4.1.3	3-hydroxypropionate-cycle_methylmalonyl-pathway_6.4.1.3_PROPIONYL-COA-CARBOXY-RXN	1 ATP + 1 propanoyl-CoA + 1 bicarbonate --> 1 H+ + 1 (S)-methylmalonyl-CoA + 1 ADP + 1 phosphate	0.78
6.4.1.4	leucine-degradation-I_6.4.1.4_METHYLCROTONYL-COA-CARBOXYLASE-RXN	1 3-methylcrotonyl-CoA + 1 bicarbonate + 1 ATP --> 1 phosphate + 1 3-methylglutaconyl-CoA + 1 H+ + 1 ADP	2.57
7.1.1.8	aerobic-respiration----electron-donor-II_1.10.2.2_1.10.2.2-RXN	2 |Cytochromes-C-Oxidized| + 1 ubiquinol-10 + 2 H+ <=> 2 |Cytochromes-C-Reduced| + 1 ubiquinone-10 + 2 H+_r	0.64	swi: adapted
7.1.2.2	oxidative_phosphorylation-3.6.3.14-ATPSYN-RXN	1 ATP + 3 H+ + 1 H2O <=> 1 ADP + 1 phosphate + 4 H+_rc	0.64	swi: adapted
7.3.2.1	oxidative_phosphorylation-3.6.3.27-3.6.3.27-RXN	1 ATP + 1 phosphate_ex + 1 H2O --> 1 ADP + 2 phosphate + 1 H+	3.24	swi: adapted
	CDP-diacylglycerol-biosynthesis_1.1.1.94_GLYC3PDEHYDROGBIOSYN-RXN_NADP	1 sn-glycerol_3-phosphate + 1 NADP+ <-- 1 NADPH + 1 dihydroxyacetone_phosphate + 1 H+	-	swi: adapted
	cis-dodecenoyl-biosynthesis_fabB_RXN	1 cis-D3-decenoyl-[ACP] + 1 malonyl-[ACP] --> 1 3-oxo-cis-D5-dodecenoyl-[ACP] + ACP + CO2	-	swi: manual
	ethylmalonyl-CoA_pathway-RXN-8959	1 methylsuccinyl-CoA --> 1 mesaconyl-CoA + 2 H+	-	swi: taken from DFL12
	ethylmalonyl-CoA_pathway-RXN-8960	1 mesaconyl-CoA + 1 H2O <=> 1 beta-methylmalyl-CoA	-	swi: taken from DFL12
	flavin_biosynthesis-RIBOPHOSPHAT-RXN	1 5-amino-6-(5-phospho-D-ribitylamino)uracil + 1 H2O --> 1 5-amino-6-(D-ribitylamino)uracil + 1 phosphate	-	swi: manual; DFL12
	phenylalanine_degra_spontaneous-RXN	1 2-(1,2-epoxy-1,2-dihydrophenyl)acetate --> 1 2-hydroxyphenylacetate	-	swi: manual; Drüppel et al. 2014a
	spontaneous_lysine-degradation_lysine-biosynthesis_1.4.1.18_RXN-8173	1 (S)-2-amino-6-oxohexanoate <=> 1 H2O + 1 (S)-2,3,4,5-tetrahydropiperidine-2-carboxylate + 1 H+	-
	spontaneous_metabolism-of-degradation_5.1.3.3_ALDOSE-1-EPIMERASE-RXN	1 alpha-D-glucose <=> 1 beta-D-glucose	-
	spontaneous_multiple-pathways_5.1.3.15_5.3.1.9_GLUCOSE-6-PHOSPHATE-1-EPIMERASE-RXN	1 alpha-D-glucose_6-phosphate <=> 1 beta-D-glucose-6-phosphate	-
	spontaneous_multiple-pathways_SPONTPRO-RXN	1 (S)-1-pyrroline-5-carboxylate + 1 H+ + 1 H2O <=> 1 L-glutamate-5-semialdehyde	-	swi: adapted; EC 1.5.5.2; metacyc
	spontaneous_no-pathway_RXN-11811	1 ammonia + 1 H+ <=> 1 ammonium	-
	spontaneous_sulfate-reduction-IV-(dissimilatory)_RXN-8315	1 sulfite + 1 H+ <=> 1 bisulfite	-
	T_trans_C_beta-D-glucose	1 beta-D-glucose + ADP + phosphate + H+ <-- 1 beta-D-glucose_ex + 1 ATP + H2O	-	swi: XylFGH; Drüppel et al. 2014
	TDA_biosynthesis-RXN	3-oxo-5,6-dehydrosuberyl-CoA_semialdehyde + 2 L-cysteine + 2 H2O + 4 NAD+ --> 1 TDA + 2 L-serine + 1 coenzyme_A + 4 NADH + 4 H+	-
	tryptophan-degradation-beta-oxidation_RXN		-

## Sheet: pathways
pathway	EC	ID	reaction
# EMP
	2.7.1.2	glycolysis_2.7.1.2_GLUCOKIN-RXN	1 ATP + 1 beta-D-glucose --> 1 ADP + 1 H+ + 1 beta-D-glucose-6-phosphate
	5.3.1.9	glycolysis_5.3.1.9_PGLUCISOM-RXN	1 beta-D-glucose-6-phosphate <=> 1 D-fructose-6-phosphate
	4.1.2.13	glycolysis_4.1.2.13_F16ALDOLASE-RXN	1 fructose-1,6-bisphosphate <=> 1 dihydroxyacetone_phosphate + 1 D-glyceraldehyde-3-phosphate
	5.3.1.1	glycolysis_5.3.1.1_TRIOSEPISOMERIZATION-RXN	1 D-glyceraldehyde-3-phosphate <=> 1 dihydroxyacetone_phosphate
	1.2.1.12	~no-pathway_1.2.1.12_GAPDHSYNEC-RXN_NAD	1 NAD+ + 1 D-glyceraldehyde-3-phosphate + 1 phosphate <=> 1 1,3-bisphospho-D-glycerate + 1 NADH + 1 H+
	2.7.2.3	glycolysis_2.7.2.3_PHOSGLYPHOS-RXN	1 ATP + 1 3-phospho-D-glycerate <=> 1 1,3-bisphospho-D-glycerate + 1 ADP
	5.4.2.12	glycolysis_5.4.2.12_3PGAREARR-RXN	1 3-phospho-D-glycerate <=> 1 2-phospho-D-glycerate
	4.2.1.11	glycolysis_4.2.1.11_2PGADEHYDRAT-RXN	1 2-phospho-D-glycerate <=> 1 phosphoenolpyruvate + 1 H2O
	2.7.1.40	glycolysis_2.7.1.40_PEPDEPHOS-RXN	1 ATP + 1 pyruvate <-- 1 H+ + 1 phosphoenolpyruvate + 1 ADP
# gluconeogenesis
	1.1.1.39	~no-pathway_1.1.1.39_1.1.1.39-RXN	1 NAD+ + 1 (S)-malate --> 1 NADH + 1 pyruvate + 1 CO2
	1.1.1.40	gluconeogenesis_C4-photosynthetic-carbon-assimilation-cycle_1.1.1.39_1.1.1.40_MALIC-NADP-RXN	1 (S)-malate + 1 NADP+ --> 1 pyruvate + 1 NADPH + 1 CO2
	4.1.1.49	superpathway-of-glyoxylate-cycle_gluconeogenesis_4.1.1.49_PEPCARBOXYKIN-RXN	1 ATP + 1 oxaloacetate --> 1 CO2 + 1 ADP + 1 phosphoenolpyruvate
	2.7.9.1	C4_photosynthetic_carbon_assimilation_cycle-2.7.9.1-PYRUVATEORTHOPHOSPHATE-DIKINASE-RXN	1 ATP + 1 phosphate + 1 pyruvate --> 1 AMP + 1 phosphoenolpyruvate + 1 diphosphate + 1 H+
	1.2.1.59	Calvin-Benson-Bassham-cycle_1.2.1.59_1.2.1.13-RXN	1 NADP+ + 1 D-glyceraldehyde-3-phosphate + 1 phosphate <-- 1 NADPH + 1 H+ + 1 1,3-bisphospho-D-glycerate
	3.1.3.11	glycolysis_3.1.3.11_F16BDEPHOS-RXN	1 fructose-1,6-bisphosphate + 1 H2O --> 1 phosphate + 1 D-fructose-6-phosphate
# EDP
	1.1.1.49	~multiple-pathways_1.1.1.49_GLU6PDEHYDROG-RXN	1 beta-D-glucose-6-phosphate + 1 NADP+ <=> 1 6-phospho-D-glucono-1,5-lactone + 1 NADPH + 1 H+
	3.1.1.31	~multiple-pathways_3.1.1.31_6PGLUCONOLACT-RXN	1 H2O + 1 6-phospho-D-glucono-1,5-lactone --> 1 H+ + 1 6-phospho-D-gluconate
	4.2.1.12	Entner-Doudoroff-pathway-I_4.2.1.12_PGLUCONDEHYDRAT-RXN	1 6-phospho-D-gluconate --> 1 H2O + 1 2-dehydro-3-deoxy-D-gluconate-6-phosphate
	4.1.2.14	Entner-Doudoroff-pathway_4.1.2.14_KDPGALDOL-RXN	1 2-dehydro-3-deoxy-D-gluconate-6-phosphate --> 1 D-glyceraldehyde-3-phosphate + 1 pyruvate
# PPP
	5.1.3.1	~multiple-pathways_5.1.3.1_RIBULP3EPIM-RXN	1 D-ribulose-5-phosphate <=> 1 D-xylulose-5-phosphate
	5.3.1.6	~multiple-pathways_5.3.1.6_RIB5PISOM-RXN	1 D-ribose-5-phosphate <=> 1 D-ribulose-5-phosphate
	2.2.1.1	~multiple-pathways_2.2.1.1_1TRANSKETO-RXN	1 D-sedoheptulose-7-phosphate + 1 D-glyceraldehyde-3-phosphate <=> 1 D-xylulose-5-phosphate + 1 D-ribose-5-phosphate
	2.2.1.1	~multiple-pathways_2.2.1.1_2TRANSKETO-RXN	1 D-xylulose-5-phosphate + 1 D-erythrose-4-phosphate <=> 1 D-glyceraldehyde-3-phosphate + 1 D-fructose-6-phosphate
	2.2.1.2	~multiple-pathways_2.2.1.2_TRANSALDOL-RXN	1 D-sedoheptulose-7-phosphate + 1 D-glyceraldehyde-3-phosphate <=> 1 D-fructose-6-phosphate + 1 D-erythrose-4-phosphate
# PDH complex
	1.2.4.1	acetyl-CoA-biosynthesis-(from-pyruvate)_1.2.4.1_RXN0-1134	1 lipoamide + 1 pyruvate + 1 H+ --> 1 S-acetyldihydrolipoamide + 1 CO2
	1.8.1.4	glycine-cleavage-complex_1.8.1.4_RXN-8629	1 NAD+ + 1 dihydrolipoamide --> 1 NADH + 1 lipoamide + 1 H+
	2.3.1.12	~no-pathway_2.3.1.12_DIHYDLIPACETRANS-RXN	1 acetyl-CoA + 1 dihydrolipoamide <=> 1 S-acetyldihydrolipoamide + 1 coenzyme_A
# CAC
	2.3.3.1	TCA-cycle_2.3.3.1_CITSYN-RXN	1 H2O + 1 acetyl-CoA + 1 oxaloacetate --> 1 H+ + 1 coenzyme_A + 1 citrate
	4.2.1.3	TCA-cycle_4.2.1.3_ACONITATEDEHYDR-RXN	1 citrate <=> 1 cis-aconitate + 1 H2O
	4.2.1.3	TCA-cycle_4.2.1.3_ACONITATEHYDR-RXN	1 cis-aconitate + 1 H2O <=> 1 D-threo-isocitrate
	1.1.1.42	reductive-TCA-cycle_1.1.1.42_ISOCITDEH-RXN	1 D-threo-isocitrate + 1 NADP+ --> 1 CO2 + 1 NADPH + 1 2-oxoglutarate
	2.3.1.61	2-ketoglutarate-dehydrogenase-complex_2.3.1.61_RXN0-1147	1 H+ + 1 dihydrolipoamide + 1 succinyl-CoA <=> 1 |Oxo-glutarate-dehydro-suc-DH-lipoyl| + 1 coenzyme_A
	1.2.4.2	2-ketoglutarate-dehydrogenase-complex_1.2.4.2_2OXOGLUTDECARB-RXN	1 2-oxoglutarate + 1 lipoamide + 2 H+ --> 1 |Oxo-glutarate-dehydro-suc-DH-lipoyl| + 1 CO2
	6.2.1.5	TCA-cycle_6.2.1.5_SUCCCOASYN-RXN	1 coenzyme_A + 1 ATP + 1 succinate <=> 1 ADP + 1 succinyl-CoA + 1 phosphate
	1.3.99.1	~no-pathway_1.3.99.1_RXN-14119	1 H+ + 1 succinate + 1 FAD <=> 1 fumarate + 1 FADH2
#	1.3.5.1	TCA-cycle_1.3.5.1_SUCCINATE-DEHYDROGENASE-UBIQUINONE-RXN	1 succinate + 1 ubiquinone-10 <=> 1 fumarate + 1 ubiquinol-10
	4.2.1.2	TCA-cycle_4.2.1.2_FUMHYDR-RXN	1 (S)-malate <=> 1 fumarate + 1 H2O
	1.1.1.37	TCA-cycle_1.1.1.37_MALATE-DEH-RXN	1 (S)-malate + 1 NAD+ <=> 1 H+ + 1 oxaloacetate + 1 NADH
	2.3.3.9	TCA-cycle-variation_2.3.3.9_MALSYN-RXN	1 acetyl-CoA + 1 H2O + 1 glyoxylate --> 1 H+ + 1 (S)-malate + 1 coenzyme_A
	6.4.1.1	anapleurotic_synthesis_of_oxalacetate-6.4.1.1-PYRUVATE-CARBOXYLASE-RXN	1 ATP + 1 bicarbonate + 1 pyruvate --> 1 ADP + 1 oxaloacetate + 1 phosphate + 1 H+
# pyruvate metabolism
	2.3.1.8	~multiple-pathways_2.3.1.8_PHOSACETYLTRANS-RXN	1 phosphate + 1 acetyl-CoA <=> 1 coenzyme_A + 1 acetylphosphate
	2.7.2.1	~multiple-pathways_2.7.2.1_ACETATEKIN-RXN	1 ATP + 1 acetate --> 1 ADP + 1 acetylphosphate
	6.2.1.1	~multiple-pathways_6.2.1.1_ACETATE--COA-LIGASE-RXN	1 acetate + 1 ATP + 1 coenzyme_A --> 1 acetyl-CoA + 1 diphosphate + 1 AMP
	1.2.1.3	oxidative-ethanol-degradation_1.2.1.3_RXN66-3	1 H2O + 1 NAD+ + 1 acetaldehyde --> 1 NADH + 2 H+ + 1 acetate
# oxidative phosphorylation
#	1.6.5.3	~multiple-pathways_1.6.5.3_NADH-DEHYDROG-A-RXN	1 NADH + 5 H+ + 1 ubiquinone-10 <=> 1 NAD+ + 1 ubiquinol-10 + 4 H+_rc
	1.6.99.5	~no-pathway_1.6.99.5_NADH-DEHYDROGENASE-RXN	1 NADH + 1 H+ + 1 ubiquinone-10 <=> 1 ubiquinol-10 + 1 NAD+
	1.10.2.2	aerobic-respiration----electron-donor-II_1.10.2.2_1.10.2.2-RXN	2 |Cytochromes-C-Oxidized| + 1 ubiquinol-10 + 2 H+ <=> 2 |Cytochromes-C-Reduced| + 1 ubiquinone-10 + 2 H+_r
	1.9.3.1	aerobic-respiration----electron-donor-II_1.9.3.1_CYTOCHROME-C-OXIDASE-RXN	1 oxygen + 4 |Cytochromes-C-Reduced| + 4 H+ --> 2 H2O + 4 |Cytochromes-C-Oxidized| + 4 H+_rc
	3.6.3.14	oxidative_phosphorylation-3.6.3.14-ATPSYN-RXN	1 ATP + 3 H+ + 1 H2O <=> 1 ADP + 1 phosphate + 4 H+_rc
	3.6.3.27	oxidative_phosphorylation-3.6.3.27-3.6.3.27-RXN	1 ATP + 1 phosphate_ex + 1 H2O --> 1 ADP + 2 phosphate + 1 H+
	3.6.1.1	~no-pathway_3.6.1.1_INORGPYROPHOSPHAT-RXN	1 diphosphate + 1 H2O --> 1 H+ + 2 phosphate
# shikimate pathway
	2.5.1.54	~no-pathway_2.5.1.54_DAHPSYN-RXN	1 H2O + 1 D-erythrose-4-phosphate + 1 phosphoenolpyruvate --> 1 phosphate + 1 3-deoxy-D-arabino-heptulosonate-7-phosphate
	4.2.3.4	~no-pathway_4.2.3.4_3-DEHYDROQUINATE-SYNTHASE-RXN	1 3-deoxy-D-arabino-heptulosonate-7-phosphate --> 1 3-dehydroquinate + 1 phosphate
	4.2.1.10	quinate-degradation_4.2.1.10_3-DEHYDROQUINATE-DEHYDRATASE-RXN	1 3-dehydroquinate <=> 1 H2O + 1 3-dehydroshikimate
	1.1.1.25	~no-pathway_1.1.1.25_RXN-7968_NADP	1 NADP+ + 1 shikimate <-- 1 3-dehydroshikimate + 1 NADPH + 1 H+
	2.7.1.71	~no-pathway_2.7.1.71_SHIKIMATE-KINASE-RXN	1 shikimate + 1 ATP --> 1 shikimate-3-phosphate + 1 H+ + 1 ADP
	2.5.1.19	~no-pathway_2.5.1.19_2.5.1.19-RXN	1 phosphoenolpyruvate + 1 shikimate-3-phosphate <=> 1 5-enolpyruvyl-shikimate-3-phosphate + 1 phosphate
	4.2.3.5	~no-pathway_4.2.3.5_CHORISMATE-SYNTHASE-RXN	1 5-enolpyruvyl-shikimate-3-phosphate --> 1 chorismate + 1 phosphate
# ethylmalonyl-CoA pathway
	2.3.1.9	~multiple-pathways_2.3.1.9_ACETYL-COA-ACETYLTRANSFER-RXN	2 acetyl-CoA <=> 1 coenzyme_A + 1 acetoacetyl-CoA
	1.1.1.35	acetyl-CoA-fermentation-to-butyrate_glutaryl-CoA-degradation_1.1.1.35_RXN-11662	1 NAD+ + 1 (S)-3-hydroxybutanoyl-CoA <=> 1 NADH + 1 H+ + 1 acetoacetyl-CoA
	1.1.1.36	~multiple-pathways_1.1.1.36_RXN-5901	1 (R)-3-hydroxybutanoyl-CoA + 1 NADP+ <-- 1 H+ + 1 NADPH + 1 acetoacetyl-CoA
	4.2.1.55	acetyl-CoA-fermentation-to-butyrate_ethylmalonyl-pathway_4.2.1.55_1.1.1.36_4.2.1.17_3-HYDROXBUTYRYL-COA-DEHYDRATASE-RXN	1 (R)-3-hydroxybutanoyl-CoA --> 1 H2O + 1 crotonyl-CoA
	4.2.1.17	~multiple-pathways_4.2.1.55_4.2.1.17_RXN-11667	1 (S)-3-hydroxybutanoyl-CoA <=> 1 crotonyl-CoA + 1 H2O
	5.1.2.3	~no-pathway_5.1.2.3_5.1.2.3-RXN	1 (S)-3-hydroxybutanoyl-CoA <=> 1 (R)-3-hydroxybutanoyl-CoA
	1.3.1.85	ethylmalonyl-pathway_1.3.1.85_RXN-8957	1 NADP+ + 1 (2S)-ethylmalonyl-CoA <=> 1 NADPH + 1 crotonyl-CoA + 1 CO2
	5.4.99.2	ethylmalonyl-pathway_5.4.99.2_RXN-8958	1 (2S)-ethylmalonyl-CoA --> 1 methylsuccinyl-CoA
		ethylmalonyl-CoA_pathway-RXN-8959	1 methylsuccinyl-CoA --> 1 mesaconyl-CoA + 2 H+
		ethylmalonyl-CoA_pathway-RXN-8960	1 mesaconyl-CoA + 1 H2O <=> 1 beta-methylmalyl-CoA
	4.1.3.24	glyoxylate-assimilation_ethylmalonyl-pathway_4.1.3.24_RXN-8961	1 beta-methylmalyl-CoA <=> 1 glyoxylate + 1 propanoyl-CoA
	6.4.1.3	3-hydroxypropionate-cycle_methylmalonyl-pathway_6.4.1.3_PROPIONYL-COA-CARBOXY-RXN	1 ATP + 1 propanoyl-CoA + 1 bicarbonate --> 1 H+ + 1 (S)-methylmalonyl-CoA + 1 ADP + 1 phosphate
	5.1.99.1	~multiple-pathways_5.1.99.1_METHYLMALONYL-COA-EPIM-RXN	1 (R)-methylmalonyl-CoA <=> 1 (S)-methylmalonyl-CoA
	5.4.99.2	~multiple-pathways_5.4.99.2_METHYLMALONYL-COA-MUT-RXN	1 (R)-methylmalonyl-CoA <=> 1 succinyl-CoA
# PHB
	2.3.1.-	PHB_biosynthesis-PhaC-2.3.1.-RXN	1 (R)-3-hydroxybutanoyl-CoA --> 1 PHB + 1 coenzyme_A
	3.1.1.-	PHB_degradation-3.1.1.75-3.1.1.75-RXN	1 PHB + 1 H2O --> 1 (R)-3-hydroxybutanoate
	1.1.1.30	-no_pathway-1.1.1.30-3-HYDROXYBUTYRATE-DEHYDROGENASE-RXN	1 (R)-3-hydroxybutanoate + 1 NAD+ <=> 1 acetoacetate + 1 NADH + 1 H+
# fatty acid biosynthesis
	# starter molecule
	6.4.1.2	~multiple-pathways_6.4.1.2_ACETYL-COA-CARBOXYLTRANSFER-RXN	1 bicarbonate + 1 ATP + 1 acetyl-CoA --> 1 malonyl-CoA + 1 H+ + 1 phosphate + 1 ADP
	2.3.1.39	fatty-acid-biosynthesis-initiation_fatty-acid-biosynthesis_2.3.1.39_MALONYL-COA-ACP-TRANSACYL-RXN	1 ACP + 1 malonyl-CoA <=> 1 malonyl-[ACP] + 1 coenzyme_A # swi: adapted
	2.3.1.180	fatty-acid-biosynthesis-initiation-I_2.3.1.180_2.3.1.180-RXN	1 malonyl-[ACP] + 1 acetyl-CoA + 1 H+ --> 1 Acetoacetyl-[ACP] + 1 CO2 + 1 coenzyme_A
	# octanoic acid
	1.1.1.100	palmitate-biosynthesis_1.1.1.100_RXN-9514	1 Acetoacetyl-[ACP]+ 1 NADPH + 1 H+ --> 1 (R)-3-hydroxy-butanoyl-[ACP] + 1 NADP+
	4.2.1.59	palmitate-biosynthesis_4.2.1.59_4.2.1.58-RXN	1 (R)-3-hydroxy-butanoyl-[ACP] --> 1 trans-D2-butenoyl-[ACP] + 1 H2O
	1.3.1.9	palmitate-biosynthesis-II-(bacteria-and-plants)_1.3.1.9_RXN-9657	1 NAD+ + 1 Butanoyl-[ACP] <-- 1 trans-D2-butenoyl-[ACP] + 1 H+ + 1 NADH
	2.3.1.41	palmitate-biosynthesis-II-(bacteria-and-plants)_2.3.1.180_2.3.1.41_RXN-9516	1 Butanoyl-[ACP] + 1 malonyl-[ACP] + 1 H+ --> 1 CO2 + 1 ACP + 1 3-oxo-hexanoyl-[ACP]
	1.1.1.100	palmitate-biosynthesis_1.1.1.100_RXN-9518	1 (R)-3-hydroxy-hexanoyl-[ACP] + 1 NADP+ <-- 1 3-oxo-hexanoyl-[ACP] + 1 H+ + 1 NADPH
	4.2.1.59	palmitate-biosynthesis_4.2.1.59_RXN-9520	1 (R)-3-hydroxy-hexanoyl-[ACP] --> 1 trans-D2-hexenoyl-[ACP] + 1 H2O
	1.3.1.9	palmitate-biosynthesis-II-(bacteria-and-plants)_1.3.1.9_RXN-9658	1 NAD+ + 1 Hexanoyl-[ACP] <-- 1 H+ + 1 trans-D2-hexenoyl-[ACP] + 1 NADH
	2.3.1.41	palmitate-biosynthesis-II-(bacteria-and-plants)_2.3.1.180_2.3.1.41_RXN-9523	1 Hexanoyl-[ACP] + 1 malonyl-[ACP] + 1 H+ → 1 ACP + 1 CO2 + 1 3-oxo-octanoyl-[ACP]
	1.1.1.100	palmitate-biosynthesis_1.1.1.100_RXN-9524	1 NADP+ + 1 (R)-3-hydroxy-octanoyl-[ACP] <-- 1 NADPH + 1 H+ + 1 |3-oxo-octanoyl-[ACP]
	4.2.1.59	palmitate-biosynthesis_4.2.1.59_4.2.1.59-RXN	1 (R)-3-hydroxy-octanoyl-[ACP] --> 1 trans-D2-octenoyl-[ACP] + 1 H2O
	1.3.1.9	palmitate-biosynthesis-II-(bacteria-and-plants)_1.3.1.9_RXN-9659	1 NAD+ + 1 Octanoyl-[ACP] <-- 1 trans-D2-octenoyl-[ACP] + 1 NADH + 1 H+
	# decanoic acid
	2.3.1.41	palmitate-biosynthesis-II-(bacteria-and-plants)_2.3.1.180_2.3.1.41_RXN-9527	1 Octanoyl-[ACP] + 1 malonyl-[ACP] + 1 H+ --> 1 ACP + 1 3-oxo-decanoyl-[ACP] + 1 CO2
	1.1.1.100	palmitate-biosynthesis_1.1.1.100_RXN-9528	1 NADP+ + 1 (R)-3-hydroxy-decanoyl-[ACP] <-- 1 H+ + 1 3-oxo-decanoyl-[ACP] + 1 NADPH
	4.2.1.59	cis-dodecenoyl-biosynthesis_palmitate-biosynthesis_4.2.1.59_RXN-9655	1 (R)-3-hydroxy-decanoyl-[ACP] --> 1 trans-D2-decenoyl-[ACP] + 1 H2O
	1.3.1.9	palmitate-biosynthesis-II-(bacteria-and-plants)_1.3.1.9_RXN-9660	1 NAD+ + 1 Decanoyl-[ACP] <-- 1 H+ + 1 NADH + 1 trans-D2-decenoyl-[ACP]
	# dodecanoic acid
	2.3.1.41	palmitate-biosynthesis-II-(bacteria-and-plants)_2.3.1.180_2.3.1.41_RXN-9531	1 Decanoyl-[ACP] + 1 malonyl-[ACP] + 1 H+ --> 1 ACP + 1 CO2 + 1 3-oxo-dodecanoyl-[ACP]
	1.1.1.100	palmitate-biosynthesis_1.1.1.100_RXN-9532	1 NADP+ + 1 (R)-3-hydroxy-dodecanoyl-[ACP] <-- 1 NADPH + 1 3-oxo-dodecanoyl-[ACP] + 1 H+
	4.2.1.59	palmitate-biosynthesis_4.2.1.59_RXN-9533	1 (R)-3-hydroxy-dodecanoyl-[ACP] --> 1 H2O + 1 trans-D2-dodecenoyl-[ACP]
	1.3.1.9	palmitate-biosynthesis-II-(bacteria-and-plants)_1.3.1.9_RXN-9661	1 NAD+ + 1 Dodecanoyl-[ACP] <-- 1 H+ + 1 trans-D2-dodecenoyl-[ACP] + 1 NADH
	# tetradecanoic acid
	2.3.1.41	palmitate-biosynthesis-II-(bacteria-and-plants)_2.3.1.180_2.3.1.41_RXN-9535	1 Dodecanoyl-[ACP] + 1 malonyl-[ACP] + 1 H+ --> 1 ACP + 1 CO2 + 1 3-oxo-tetradecanoyl-[ACP]
	1.1.1.100	palmitate-biosynthesis_1.1.1.100_RXN-9536	1 NADP+ + 1 (R)-3-hydroxy-tetradecanoyl-[ACP] <-- 1 NADPH + 1 3-oxo-tetradecanoyl-[ACP] + 1 H+
	4.2.1.59	palmitate-biosynthesis_4.2.1.59_RXN-9537	1 (R)-3-hydroxy-tetradecanoyl-[ACP] --> 1 H2O + 1 trans-D2-tetradecenoyl-[ACP]
	1.3.1.9	palmitate-biosynthesis-II-(bacteria-and-plants)_1.3.1.9_RXN-9662	1 NAD+ + 1 Tetradecanoyl-[ACP] <-- 1 H+ + 1 trans-D2-tetradecenoyl-[ACP] + 1 NADH
	# hexadecanoic acid
	2.3.1.41	palmitate-biosynthesis-II-(bacteria-and-plants)_2.3.1.41_RXN-9539	1 Tetradecanoyl-[ACP] + 1 malonyl-[ACP] + 1 H+ --> 1 ACP + 1 CO2 + 1 3-oxo-hexadecanoyl-[ACP]
	1.1.1.100	palmitate-biosynthesis_1.1.1.100_RXN-9540	1 NADP+ + 1 (R)-3-hydroxy-hexadecanoyl-[ACP] <-- 1 NADPH + 1 3-oxo-hexadecanoyl-[ACP] + 1 H+
	4.2.1.59	palmitate-biosynthesis_4.2.1.59_4.2.1.61-RXN	1 (R)-3-hydroxy-hexadecanoyl-[ACP] --> 1 H2O + 1 trans-D2-hexadecenoyl-[ACP]
	1.3.1.9	palmitate-biosynthesis-II-(bacteria-and-plants)_1.3.1.9_RXN-9663	1 NAD+ + 1 Hexadecanoyl-[ACP] <-- 1 H+ + 1 trans-D2-hexadecenoyl-[ACP] + 1 NADH
	# octadecanoic acid
	2.3.1.41	stearate-biosynthesis-II-(bacteria-and-plants)_2.3.1.41_RXN-9632	1 Hexadecanoyl-[ACP] + 1 malonyl-[ACP] + 1 H+ --> 1 ACP + 1 CO2 + 1 3-oxo-octadecanoyl-[ACP]
	1.1.1.100	stearate-biosynthesis_1.1.1.100_RXN-9633	1 NADP+ + 1 (R)-3-hydroxy-octadecanoyl-[ACP] <-- 1 NADPH + 1 3-oxo-octadecanoyl-[ACP] + 1 H+
	4.2.1.59	stearate-biosynthesis_4.2.1.59_RXN-9634	1 (R)-3-hydroxy-octadecanoyl-[ACP] --> 1 H2O + 1 trans-D2-octadecenoyl-[ACP]
	1.3.1.9	stearate-biosynthesis-II-(bacteria-and-plants)_1.3.1.9_RXN-9635	1 NAD+ + 1 Octadecanoyl-[ACP] <-- 1 H+ + 1 trans-D2-octadecenoyl-[ACP] + 1 NADH
	# cis-D5-dodecenoyl-[ACP]
	5.3.3.14	cis-dodecenoyl-biosynthesis_5.3.3.14_5.3.3.14-RXN	1 trans-D2-decenoyl-[ACP] --> 1 cis-D3-decenoyl-[ACP]
		cis-dodecenoyl-biosynthesis_fabB_RXN	1 cis-D3-decenoyl-[ACP] + 1 malonyl-[ACP] --> 1 3-oxo-cis-D5-dodecenoyl-[ACP] + ACP + CO2
	1.1.1.100	cis-dodecenoyl-biosynthesis_1.1.1.100_RXN0-2142	1 (3R)-hydroxy-cis-D5-dodecenoyl-[ACP] + 1 NADP+ <-- 1 H+ + 1 3-oxo-cis-D5-dodecenoyl-[ACP] + 1 NADPH
	4.2.1.59	cis-dodecenoyl-biosynthesis_4.2.1.59_RXN0-2144	1 (3R)-hydroxy-cis-D5-dodecenoyl-[ACP] --> 1 H2O + 1 trans-D3-cis-D5-dodecenoyl-[ACP]
	1.3.1.9	cis-dodecenoyl-biosynthesis_1.3.1.9_RXN0-2145	1 cis-D5-dodecenoyl-[ACP] + 1 NAD+ <-- 1 H+ + 1 trans-D3-cis-D5-dodecenoyl-[ACP] + 1 NADH
	# palmitoleoyl-[ACP] ((Z)-hexadec-11-enoyl-[ACP])
	2.3.1.41	palmitoleate-biosynthesis-I_2.3.1.41_RXN-10654	1 cis-D5-dodecenoyl-[ACP] + 1 malonyl-[ACP] + 1 H+ --> 1 ACP + 1 CO2 + 1 3-oxo-cis-D7-tetradecenoyl-[ACP]
	1.1.1.100	palmitoleate-biosynthesis-I_1.1.1.100_RXN-10655	1 NADP+ + 1 (3R)-hydroxy-cis-D7-tetradecenoyl-[ACP] <-- 1 3-oxo-cis-D7-tetradecenoyl-[ACP] + 1 NADPH + 1 H+
	4.2.1.59	palmitoleate-biosynthesis-I_4.2.1.59_RXN-10656	1 (3R)-hydroxy-cis-D7-tetradecenoyl-[ACP] --> 1 trans-D3-cis-D7-tetradecenoyl-[ACP] + 1 H2O
	1.3.1.9	palmitoleate-biosynthesis-I_1.3.1.9_RXN-10657	1 cis-D7-tetradecenoyl-[ACP] + 1 NAD+ <-- 1 trans-D3-cis-D7-tetradecenoyl-[ACP] + 1 H+ + 1 NADH
	2.3.1.41	palmitoleate-biosynthesis-I_2.3.1.41_RXN-10658	1 cis-D7-tetradecenoyl-[ACP] + 1 malonyl-[ACP] + 1 H+ --> 1 CO2 + 1 3-oxo-cis-D9-hexadecenoyl-[ACP] + 1 ACP
	1.1.1.100	palmitoleate-biosynthesis-I_1.1.1.100_RXN-10659	1 NADP+ + 1 (3R)-hydroxy-cis-D9-hexaecenoyl-[ACP] <-- 1 3-oxo-cis-D9-hexadecenoyl-[ACP] + 1 H+ + 1 NADPH
	4.2.1.59	palmitoleate-biosynthesis-I_4.2.1.59_RXN-10660	1 (3R)-hydroxy-cis-D9-hexaecenoyl-[ACP] --> 1 H2O + 1 trans-D3-cis-D9-hexadecenoyl-[ACP]
	1.3.1.9	palmitoleate-biosynthesis-I_1.3.1.9_RXN-10661	1 Palmitoleoyl-[ACP] + 1 NAD+ <-- 1 H+ + 1 trans-D3-cis-D9-hexadecenoyl-[ACP] + 1 NADH
	# cis-vaccenic acid ((Z)-octadec-11-enoic acid)
	2.3.1.179	cis-vaccenate-biosynthesis_2.3.1.179_2.3.1.179-RXN	1 Palmitoleoyl-[ACP] + 1 malonyl-[ACP] + 1 H+ --> 1 3-oxo-cis-vaccenoyl-[ACP] + 1 CO2 + 1 ACP
	1.1.1.100	cis-vaccenate-biosynthesis_1.1.1.100_RXN-9556	1 (R)-3-hydroxy-cis-vaccenoyl-[ACP] + 1 NADP+ <-- 1 3-oxo-cis-vaccenoyl-[ACP] + 1 H+ + 1 NADPH
	4.2.1.59	cis-vaccenate-biosynthesis_4.2.1.59_RXN-9557	1 (R)-3-hydroxy-cis-vaccenoyl-[ACP] --> 1 H2O + 1 cis-vaccen-2-enoyl-[ACP]
	1.3.1.9	cis-vaccenate-biosynthesis_1.3.1.9_RXN-9558	1 NADH + 1 H+ + 1 cis-vaccen-2-enoyl-[ACP] --> 1 NAD+ + 1 cis-vaccenoyl-[ACP]
# phospholipids
	# phosphatidylglycerol
	1.1.1.94	CDP-diacylglycerol-biosynthesis_1.1.1.94_GLYC3PDEHYDROGBIOSYN-RXN_NAD	1 NAD+ + 1 sn-glycerol_3-phosphate <-- 1 dihydroxyacetone_phosphate + 1 NADH + 1 H+
		CDP-diacylglycerol-biosynthesis_1.1.1.94_GLYC3PDEHYDROGBIOSYN-RXN_NADP	1 sn-glycerol_3-phosphate + 1 NADP+ <-- 1 NADPH + 1 dihydroxyacetone_phosphate + 1 H+
	2.3.1.15	CDP-diacylglycerol-biosynthesis-II_2.3.1.15_RXN-10462	1 cis-vaccenoyl-[ACP] + 1 sn-glycerol_3-phosphate --> 1 cis-vaccenoyl-sn-glycerol-3-phosphate + 1 ACP
	2.3.1.51	CDP-diacylglycerol-biosynthesis_2.3.1.51_1-ACYLGLYCEROL-3-P-ACYLTRANSFER-RXN	1 cis-vaccenoyl-sn-glycerol-3-phosphate + 1 cis-vaccenoyl-[ACP] --> 1 1,2-di-cis-vaccenoyl-sn-glycerol-3-phosphate + 1 ACP
	2.7.7.41	~no-pathway_2.7.7.41_RXN0-5515	1 CTP + 1 1,2-di-cis-vaccenoyl-sn-glycerol-3-phosphate + 1 H+ --> 1 diphosphate + 1 CDP-1,2-di-cis-vaccenoylglycerol
	2.7.8.5	PG_I-2.7.8.5-PHOSPHAGLYPSYN-RXN	1 CDP-1,2-di-cis-vaccenoylglycerol + 1 sn-glycerol-3-phosphate --> 1 H+ + 1 CMP + 1 L-1-phosphatidylglycerol-phosphate
	3.1.3.27	~no-pathway_3.1.3.27_RXN-13313	1 L-1-phosphatidylglycerol-phosphate + 1 H2O --> 1 L-1-phosphatidylglycerol + 1 phosphate
	# phosphatidylethanolamine
	2.7.8.8	PE_2.7.8.8_RXN	1 CDP-1,2-di-cis-vaccenoylglycerol + 1 L-serine --> 1 H+ + 1 CMP + 1 L-1-phosphatidylserine
	4.1.1.65	phosphatidylethanolamine-biosynthesis-I_4.1.1.65_PHOSPHASERDECARB-RXN	1 L-1-phosphatidylserine + 1 H+ --> 1 CO2 + 1 L-1-phosphatidylethanolamine
	# phosphatidylcholine
	2.1.1.17	phosphatidylcholine-biosynthesis-V_2.1.1.17_2.1.1.17-RXN	1 L-1-phosphatidylethanolamine + 1 S-adenosyl-L-methionine --> 1 phosphatidyl-N-methylethanolamine + 1 S-adenosyl-L-homocysteine + 1 H+
	2.1.1.71	phosphatidylcholine-biosynthesis_2.1.1.71_2.1.1.71-RXN	1 phosphatidyl-N-methylethanolamine + 1 S-adenosyl-L-methionine --> 1 H+ + 1 phosphatidyl-N-dimethylethanolamine + 1 S-adenosyl-L-homocysteine
	2.1.1.71	phosphatidylcholine-biosynthesis_2.1.1.17_2.1.1.71_RXN4FS-2	1 phosphatidyl-N-dimethylethanolamine + 1 S-adenosyl-L-methionine --> 1 phosphatidylcholine + 1 H+ + 1 S-adenosyl-L-homocysteine
	# cardiolipin
	2.7.8.-	cardiolipin-biosynthesis-I_2.7.8.-_CARDIOLIPSYN-RXN	L-1-phosphatidylglycerol + CDP-1,2-di-cis-vaccenoylglycerol --> 1 cardiolipin + 1 CMP + H+
# amino acids biosynthesis
	# aspartate and asparagine biosynthesis
	2.6.1.1	~multiple-pathways_2.6.1.1_ASPAMINOTRANS-RXN	1 2-oxoglutarate + 1 L-aspartate <=> 1 oxaloacetate + 1 L-glutamate
	3.5.1.1	~metabolism-of-asparagine_3.5.1.1_ASPARAGHYD-RXN	1 L-asparagine + 1 H2O --> 1 L-aspartate + 1 ammonia + 1 H+
	6.1.1.-	~no-pathway_6.1.1.-_RXN490-3616	1 L-aspartate + 1 |ASN-tRNAs| + 1 ATP --> 1 diphosphate + 1 |L-aspartyl-tRNAAsn| + 1 AMP
	6.3.5.6	~no-pathway_6.3.5.6_6.3.5.6-RXN	1 L-glutamine + 1 |L-aspartyl-tRNAAsn| + 1 H2O + 1 ATP --> 1 L-glutamate + 1 |Charged-ASN-tRNAs| + 2 H+ + 1 phosphate + 1 ADP
	3.1.1.29	~no-pathway_3.1.1.29_RXN-12460	1 |Charged-ASN-tRNAs| + 1 H2O --> 2 H+ + 1 |ASN-tRNAs| + 1 L-asparagine
	# glutamate and glutamine biosynthesis
	1.4.1.3	~multiple-pathways_1.4.1.3_GLUTAMATE-DEHYDROGENASE-NADP+-RXN_NAD	1 L-glutamate + 1 H2O + 1 NAD+ <=> 1 2-oxoglutarate + 1 NADH + 2 H+ + 1 ammonia
	1.4.1.3	~multiple-pathways_1.4.1.3_GLUTAMATE-DEHYDROGENASE-NADP+-RXN_NADP	1 L-glutamate + 1 H2O + 1 NADP+ <=> 1 ammonia + 1 NADPH + 1 2-oxoglutarate + 2 H+
	1.4.1.13	glutamate-biosynthesis_glutamine-degradation_1.4.1.13_GLUTAMATESYN-RXN	1 NADP+ + 2 L-glutamate <-- 1 H+ + 1 2-oxoglutarate + 1 NADPH + 1 L-glutamine
	6.3.1.2	glutamine-biosynthesis_nitrate-reduction_6.3.1.2_GLUTAMINESYN-RXN	1 ATP + 1 ammonia + 1 L-glutamate --> 1 ADP + 1 phosphate + 1 L-glutamine
	# proline biosynthesis
	2.7.2.11	proline-biosynthesis_citrulline-biosynthesis_2.7.2.11_GLUTKIN-RXN	1 ATP + 1 L-glutamate --> 1 ADP + 1 L-glutamate-5-phosphate
	1.2.1.41	proline-biosynthesis_citrulline-biosynthesis_1.2.1.41_GLUTSEMIALDEHYDROG-RXN	1 NADP+ + 1 L-glutamate_gamma-semialdehyde + 1 phosphate <-- 1 NADPH + 1 L-glutamate-5-phosphate + 1 H+
	1.5.1.2	proline-biosynthesis_arginine-degradation_1.5.1.2_PYRROLINECARBREDUCT-RXN_NAD	1 NAD+ + 1 L-proline <-- 1 (S)-1-pyrroline-5-carboxylate + 1 NADH + 2 H+
	1.5.1.2	proline-biosynthesis_arginine-degradation_1.5.1.2_PYRROLINECARBREDUCT-RXN_NADP	1 NADP+ + 1 L-proline <-- 2 H+ + 1 NADPH + 1 (S)-1-pyrroline-5-carboxylate
	# arginine biosynthesis
	2.3.1.1	ornithine-biosynthesis_arginine-biosynthesis_2.3.1.1_N-ACETYLTRANSFER-RXN	1 acetyl-CoA + 1 L-glutamate --> 1 H+ + 1 coenzyme_A + 1 N-acetyl-L-glutamate
	2.3.1.35	arginine-biosynthesis-II-(acetyl-cycle)_2.3.1.35_GLUTAMATE-N-ACETYLTRANSFERASE-RXN	1 N-acetyl-L-ornithine + 1 L-glutamate --> 1 L-ornithine + 1 N-acetyl-L-glutamate
	2.7.2.8	ornithine-biosynthesis_arginine-biosynthesis_2.7.2.8_ACETYLGLUTKIN-RXN	1 ATP + 1 N-acetyl-L-glutamate --> 1 N-acetylglutamyl-phosphate + 1 ADP
	1.2.1.38	ornithine-biosynthesis_arginine-biosynthesis_1.2.1.38_N-ACETYLGLUTPREDUCT-RXN	1 NADP+ + 1 N-acetyl-L-glutamate_5-semialdehyde + 1 phosphate <=> 1 H+ + 1 N-acetylglutamyl-phosphate + 1 NADPH
	2.6.1.11	ornithine-biosynthesis_arginine-biosynthesis_2.6.1.11_ACETYLORNTRANSAM-RXN	1 2-oxoglutarate + 1 N-acetyl-L-ornithine <=> 1 L-glutamate + 1 N-acetyl-L-glutamate_5-semialdehyde
	3.5.1.16	ornithine-biosynthesis_3.5.1.16_ACETYLORNDEACET-RXN	1 N-acetyl-L-ornithine + 1 H2O --> 1 acetate + 1 L-ornithine
	2.1.3.3	~multiple-pathways_2.1.3.3_ORNCARBAMTRANSFER-RXN	1 carbamoyl-phosphate + 1 L-ornithine <=> 1 H+ + 1 L-citrulline + 1 phosphate
	6.3.4.5	~multiple-pathways_6.3.4.5_ARGSUCCINSYN-RXN	1 L-aspartate + 1 L-citrulline + 1 ATP --> 1 diphosphate + 1 L-arginino-succinate + 1 H+ + 1 AMP
	4.3.2.1	~multiple-pathways_4.3.2.1_ARGSUCCINLYA-RXN	1 L-arginino-succinate <=> 1 fumarate + 1 L-arginine
	6.3.5.5	de-novo-biosynthesis-of-uridine-5'-monophosphate_arginine-biosynthesis_6.3.5.5_CARBPSYN-RXN	2 ATP + 1 L-glutamine + 1 H2O + 1 bicarbonate --> 1 phosphate + 2 ADP + 2 H+ + 1 L-glutamate + 1 carbamoyl-phosphate
	# valine biosynthesis
	2.2.1.6	valine-biosynthesis_2.2.1.6_ACETOLACTSYN-RXN	2 pyruvate + 1 H+ --> 1 CO2 + 1 (S)-2-acetolactate
	1.1.1.86	valine-biosynthesis_1.1.1.86_ACETOLACTREDUCTOISOM-RXN	1 NADP+ + 1 (R)-2,3-dihydroxy-3-methylbutanoate <=> 1 NADPH + 1 H+ + 1 (S)-2-acetolactate
	4.2.1.9	valine-biosynthesis_4.2.1.9_DIHYDROXYISOVALDEHYDRAT-RXN	1 (R)-2,3-dihydroxy-3-methylbutanoate --> 1 H2O + 1 2-oxoisovalerate
	2.6.1.42	~multiple-pathways_2.6.1.42_BRANCHED-CHAINAMINOTRANSFERVAL-RXN	1 2-oxoglutarate + 1 L-valine <=> 1 L-glutamate + 1 2-oxoisovalerate
	# leucine biosynthesis
	2.3.3.13	leucine-biosynthesis_2.3.3.13_2-ISOPROPYLMALATESYN-RXN	1 acetyl-CoA + 1 H2O + 1 2-oxoisovalerate --> 1 coenzyme_A + 1 H+ + 1 (2S)-2-isopropylmalate
	4.2.1.33	leucine-biosynthesis_4.2.1.33_3-ISOPROPYLMALISOM-RXN	1 (2S)-2-isopropylmalate --> 1 2-isopropylmaleate + 1 H2O
	4.2.1.33	leucine_metabolism-4.2.1.33-RXN-8991	1 (2R,3S)-3-isopropylmalate <-- 1 2-isopropylmaleate + 1 H2O
	1.1.1.85	leucine-biosynthesis_1.1.1.85_3-ISOPROPYLMALDEHYDROG-RXN	1 (2R,3S)-3-isopropylmalate + 1 NAD+ <=> 1 H+ + 1 NADH + 1 (2S)-2-isopropyl-3-oxosuccinate
	1.1.1.85 (spontaneous)	leucine-biosynthesis_1.1.1.85_RXN-7800	1 (2S)-2-isopropyl-3-oxosuccinate + 1 H+ --> 1 CO2 + 1 4-methyl-2-oxopentanoate
	2.6.1.42	leucine-biosynthesis_2.6.1.42_BRANCHED-CHAINAMINOTRANSFERLEU-RXN	1 2-oxoglutarate + 1 L-leucine <=> 1 L-glutamate + 1 4-methyl-2-oxopentanoate
	# isoleucine biosynthesis
	2.2.1.6	isoleucine-biosynthesis-from-threonine_isoleucine-biosynthesis_2.2.1.6_ACETOOHBUTSYN-RXN	1 H+ + 1 2-oxobutanoate + 1 pyruvate --> 1 CO2 + 1 2-aceto-2-hydroxy-butanoate
	1.1.1.86	isoleucine-biosynthesis-from-threonine_isoleucine-biosynthesis_1.1.1.86_ACETOOHBUTREDUCTOISOM-RXN	1 NADP+ + 1 2,3-dihydroxy-3-methylvalerate <=> 1 H+ + 1 NADPH + 1 2-aceto-2-hydroxy-butanoate
	4.2.1.9	isoleucine-biosynthesis-from-threonine_isoleucine-biosynthesis_4.2.1.9_DIHYDROXYMETVALDEHYDRAT-RXN	1 2,3-dihydroxy-3-methylvalerate --> 1 H2O + 1 2-keto-3-methyl-valerate
	2.6.1.42	~metabolism-of-isoleucine_2.6.1.42_BRANCHED-CHAINAMINOTRANSFERILEU-RXN	1 2-oxoglutarate + 1 L-isoleucine <=> 1 L-glutamate + 1 2-keto-3-methyl-valerate
	4.3.1.19	isoleucine-biosynthesis-from-threonine_threonine-degradation_4.3.1.19_THREDEHYD-RXN	1 L-threonine --> 1 H+ + 1 2-oxobutanoate + 1 ammonia
	# threonine biosynthesis
	2.7.2.4	~metabolism-of-biosynthesis_2.7.2.4_ASPARTATEKIN-RXN	1 ATP + 1 L-aspartate --> 1 L-aspartyl-4-phosphate + 1 ADP
	1.2.1.11	~metabolism-of-biosynthesis_1.2.1.11_ASPARTATE-SEMIALDEHYDE-DEHYDROGENASE-RXN	1 phosphate + 1 NADP+ + 1 L-aspartate-semialdehyde <=> 1 NADPH + 1 L-aspartyl-4-phosphate + 1 H+
	1.1.1.3	homoserine-biosynthesis_1.1.1.3_HOMOSERDEHYDROG-RXN_NAD	1 NAD+ + 1 L-homoserine <-- 1 L-aspartate-semialdehyde + 1 NADH + 1 H+
	1.1.1.3	homoserine-biosynthesis_1.1.1.3_HOMOSERDEHYDROG-RXN_NADP	1 L-homoserine + 1 NADP+ <-- 1 H+ + 1 NADPH + 1 L-aspartate-semialdehyde
	2.7.1.39	methionine-biosynthesis_threonine-biosynthesis-from-homoserine_2.7.1.39_HOMOSERKIN-RXN	1 L-homoserine + 1 ATP --> 1 H+ + 1 O-phospho-L-homoserine + 1 ADP
	4.2.3.1	threonine-biosynthesis-from-homoserine_4.2.3.1_THRESYN-RXN	1 O-phospho-L-homoserine + 1 H2O --> 1 L-threonine + 1 phosphate
	4.1.2.5	~no-pathway_4.1.2.5_LTAA-RXN	1 L-threonine → 1 glycine + 1 acetaldehyde
	# methionine biosynthesis
	2.3.1.46	methionine-biosynthesis-I_2.3.1.46_HOMSUCTRAN-RXN	1 L-homoserine + 1 succinyl-CoA --> 1 coenzyme_A + 1 O-succinyl-L-homoserine
	2.5.1.48	methionine-biosynthesis-I_2.5.1.48_O-SUCCHOMOSERLYASE-RXN	1 L-cysteine + 1 O-succinyl-L-homoserine --> 1 L-cystathionine + 1 succinate + 1 H+
	4.4.1.8	methionine-biosynthesis_homocysteine-and-cysteine-interconversion_4.4.1.8_CYSTATHIONINE-BETA-LYASE-RXN	1 H2O + 1 L-cystathionine --> 1 L-homocysteine + 1 ammonia + 1 H+ + 1 pyruvate
	2.1.1.13	~multiple-pathways_2.1.1.13_HOMOCYSMETB12-RXN	1 5-methyl-tetrahydrofolate + 1 L-homocysteine --> 1 tetrahydrofolate + 1 L-methionine
	2.1.1.14	S-adenosyl-L-methionine-cycle_methionine-biosynthesis_2.1.1.14_HOMOCYSMET-RXN	1 5-methyltetrahydropteroyltri-L-glutamate + 1 L-homocysteine <=> 1 L-methionine + 1 tetrahydropteroyl_tri-L-glutamate
	2.5.1.6	~multiple-pathways_2.5.1.6_S-ADENMETSYN-RXN	1 L-methionine + 1 ATP + 1 H2O --> 1 phosphate + 1 diphosphate + 1 S-adenosyl-L-methionine
	3.3.1.1	S-adenosyl-L-methionine-cycle_methionine-degradation_3.3.1.1_ADENOSYLHOMOCYSTEINASE-RXN	1 S-adenosyl-L-homocysteine + 1 H2O --> 1 L-homocysteine + 1 adenosine
	2.5.1.49	S-methyl-5-thio-alpha-D-ribose-1-phosphate-degradation-II_2.5.1.49_O-ACETYLHOMOSERINE-THIOL-LYASE-RXN	1 O-acetyl-L-homoserine + 1 methanethiol --> 1 acetate + 1 H+ + 1 L-methionine
	2.5.1.49	homocysteine-biosynthesis_2.5.1.49_ACETYLHOMOSER-CYS-RXN	1 O-acetyl-L-homoserine + 1 hydrogen_sulfide <=> 1 H+ + 1 acetate + 1 L-homocysteine
	# lysine biosynthesis
	4.3.3.7	lysine-biosynthesis_4.3.3.7_DIHYDRODIPICSYN-RXN	1 L-aspartate-semialdehyde + 1 pyruvate --> 1 H2O + 1 H+ + 1 (2S,4S)-4-hydroxy-2,3,4,5-tetrahydrodipicolinate
	1.17.1.8	~no-pathway_1.17.1.8_RXN-14014	1 NADP+ + 1 H2O + 1 (S)-2,3,4,5-tetrahydrodipicolinate <-- 1 H+ + 1 (2S,4S)-4-hydroxy-2,3,4,5-tetrahydrodipicolinate + 1 NADPH
	2.3.1.117	lysine-biosynthesis-I_2.3.1.117_TETHYDPICSUCC-RXN	1 (S)-2,3,4,5-tetrahydrodipicolinate + 1 succinyl-CoA + 1 H2O --> 1 coenzyme_A + 1 N-succinyl-2-amino-6-ketopimelate
	2.6.1.17	lysine-biosynthesis-I_2.6.1.17_SUCCINYLDIAMINOPIMTRANS-RXN	1 2-oxoglutarate + 1 N-succinyl-L,L-2,6-diaminopimelate <=> 1 N-succinyl-2-amino-6-ketopimelate + 1 L-glutamate
	3.5.1.18	lysine-biosynthesis-I_3.5.1.18_SUCCDIAMINOPIMDESUCC-RXN	1 N-succinyl-L,L-2,6-diaminopimelate + 1 H2O --> 1 succinate + 1 L,L-diaminopimelate
	5.1.1.7	lysine-biosynthesis_5.1.1.7_DIAMINOPIMEPIM-RXN	1 L,L-diaminopimelate <=> 1 meso-diaminopimelate
	4.1.1.20	lysine-biosynthesis_4.1.1.20_DIAMINOPIMDECARB-RXN	1 meso-diaminopimelate + 1 H+ --> 1 L-lysine + 1 CO2
	# serine and glycine biosynthesis
	1.1.1.95	serine-biosynthesis_1.1.1.95_PGLYCDEHYDROG-RXN	1 3-phospho-D-glycerate + 1 NAD+ <=> 1 H+ + 1 NADH + 1 3-phospho-hydroxypyruvate
	2.6.1.52	serine-biosynthesis_2.6.1.52_PSERTRANSAM-RXN	1 3-phospho-L-serine + 1 2-oxoglutarate <=> 1 L-glutamate + 1 3-phospho-hydroxypyruvate
	3.1.3.3	serine-biosynthesis_3.1.3.3_RXN0-5114	1 3-phospho-L-serine + 1 H2O --> 1 phosphate + 1 L-serine
	2.1.2.1	~multiple-pathways_2.1.2.1_GLYOHMETRANS-RXN	1 L-serine + 1 tetrahydrofolate <=> 1 H2O + 1 5,10-methylenetetrahydrofolate + 1 glycine
	# cysteine biosynthesis
	2.3.1.30	cysteine-biosynthesis-I_2.3.1.30_SERINE-O-ACETTRAN-RXN	1 L-serine + 1 acetyl-CoA <=> 1 coenzyme_A + 1 O-acetyl-L-serine
	2.5.1.47	cysteine-biosynthesis-I_2.5.1.47_ACSERLY-RXN	1 O-acetyl-L-serine + 1 hydrogen_sulfide <=> 1 L-cysteine + 1 H+ + 1 acetate
	2.8.1.7	alanine-biosynthesis-III_2.8.1.7_RXN0-308	1 L-cysteine + 1 |L-Cysteine-Desulfurases| --> 1 |Persulfurated-L-cysteine-desulfurases| + 1 L-alanine
	# tyrosine and phenylalanine biosynthesis
	5.4.99.5	phenylalanine-biosynthesis_tyrosine-biosynthesis_5.4.99.5_CHORISMATEMUT-RXN	1 chorismate <=> 1 prephenate
	1.3.1.12	tyrosine-biosynthesis-I_1.3.1.12_PREPHENATEDEHYDROG-RXN	1 NAD+ + 1 prephenate --> 1 NADH + 1 4-hydroxyphenylpyruvate + 1 CO2
	2.6.1.57	~multiple-pathways_2.6.1.57_TYROSINE-AMINOTRANSFERASE-RXN	1 2-oxoglutarate + 1 L-tyrosine <=> 1 L-glutamate + 1 4-hydroxyphenylpyruvate
	4.2.1.51	phenylalanine-biosynthesis-I_4.2.1.51_PREPHENATEDEHYDRAT-RXN	1 prephenate + 1 H+ --> 1 keto-phenylpyruvate + 1 CO2 + 1 H2O
	2.6.1.57	phenylalanine-biosynthesis_2.6.1.57_PHEAMINOTRANS-RXN	1 L-glutamate + 1 keto-phenylpyruvate <=> 1 L-phenylalanine + 1 2-oxoglutarate
	# tryptophan biosynthesis
	4.1.3.27	tryptophan-biosynthesis_4.1.3.27_ANTHRANSYN-RXN	1 chorismate + 1 L-glutamine <=> 1 H+ + 1 pyruvate + 1 L-glutamate + 1 anthranilate
	2.4.2.18	tryptophan-biosynthesis_2.4.2.18_PRTRANS-RXN	1 N-(5'-phosphoribosyl)-anthranilate + 1 diphosphate <-- 1 5-phospho-alpha-D-ribose_1-diphosphate + 1 anthranilate
	5.3.1.24	tryptophan-biosynthesis_5.3.1.24_PRAISOM-RXN	1 N-(5'-phosphoribosyl)-anthranilate --> 1 1-(o-carboxyphenylamino)-1'-deoxyribulose-5'-phosphate
	4.1.1.48	tryptophan-biosynthesis_4.1.1.48_IGPSYN-RXN	1 H+ + 1 1-(o-carboxyphenylamino)-1'-deoxyribulose-5'-phosphate --> 1 (1S,2R)-1-C-(indol-3-yl)glycerol_3-phosphate + 1 H2O + 1 CO2
	4.2.1.20	IAA-biosynthesis_tryptophan-biosynthesis_4.2.1.20_RXN0-2381	1 (1S,2R)-1-C-(indol-3-yl)glycerol_3-phosphate <=> 1 D-glyceraldehyde-3-phosphate + 1 indole
	4.2.1.20	tryptophan-biosynthesis_4.2.1.20_RXN0-2382	1 indole + 1 L-serine --> 1 L-tryptophan + 1 H2O
	# histidine biosynthesis
	5.4.2.7	PRPP-biosynthesis-II_5.4.2.7_PPENTOMUT-RXN	1 alpha-D-ribose-1-phosphate <=> 1 D-ribose-5-phosphate
	2.7.6.1	PRPP-biosynthesis-I_2.7.6.1_PRPPSYN-RXN	1 ATP + 1 D-ribose-5-phosphate <=> 1 5-phospho-alpha-D-ribose_1-diphosphate + 1 H+ + 1 AMP
	2.4.2.17	histidine-biosynthesis-I_2.4.2.17_ATPPHOSPHORIBOSYLTRANS-RXN	1 phosphoribosyl-ATP + 1 diphosphate <-- 1 5-phospho-alpha-D-ribose_1-diphosphate + 1 ATP
	3.6.1.31	histidine-biosynthesis-I_3.6.1.31_HISTPRATPHYD-RXN	1 phosphoribosyl-ATP + 1 H2O --> 1 H+ + 1 diphosphate + 1 1-(5-phospho-D-ribosyl)-AMP
	3.5.4.19	histidine-biosynthesis-I_3.5.4.19_HISTCYCLOHYD-RXN	1 1-(5-phospho-D-ribosyl)-AMP + 1 H2O --> 1 1-(5-phosphoribosyl)-5-[(5-phosphoribosylamino)methylideneamino]imidazole-4-carboxamide
	5.3.1.16	histidine-biosynthesis-I_5.3.1.16_PRIBFAICARPISOM-RXN	1 1-(5-phosphoribosyl)-5-[(5-phosphoribosylamino)methylideneamino]imidazole-4-carboxamide --> 1 phosphoribulosylformimino-AICAR-P
	4.1.3.-/2.4.2.-	histidine-biosynthesis-I_4.1.3.-_2.4.2.-_GLUTAMIDOTRANS-RXN	1 phosphoribulosylformimino-AICAR-P + 1 L-glutamine --> 1 D-erythro-imidazole-glycerol-phosphate + 1 L-glutamate + 1 H+ + 1 aminoimidazole_carboxamide_ribonucleotide
	4.2.1.19	histidine-biosynthesis-I_4.2.1.19_IMIDPHOSDEHYD-RXN	1 D-erythro-imidazole-glycerol-phosphate --> 1 H2O + 1 imidazole_acetol-phosphate
	2.6.1.9	histidine-biosynthesis-I_2.6.1.9_HISTAMINOTRANS-RXN	1 L-glutamate + 1 imidazole_acetol-phosphate <=> 1 2-oxoglutarate + 1 L-histidinol-phosphate
	3.1.3.15	histidine-biosynthesis-I_3.1.3.15_HISTIDPHOS-RXN	1 L-histidinol-phosphate + 1 H2O --> 1 phosphate + 1 histidinol
	1.1.1.23	histidine-biosynthesis-I_1.1.1.23_HISTOLDEHYD-RXN	1 histidinol + 1 NAD+ --> 1 histidinal + 1 H+ + 1 NADH
	1.1.1.23	histidine-biosynthesis-I_1.1.1.23_HISTALDEHYD-RXN	1 H2O + 1 NAD+ + 1 histidinal --> 1 NADH + 2 H+ + 1 L-histidine
	# beta-alanine biosynthesis
	1.3.8.-	beta-alanine-biosynthesis-II_1.3.8.-_PROPCOASYN-RXN	1 FAD + 1 propanoyl-CoA --> 1 FADH2 + 1 acryloyl-CoA
	4.2.1.116	~multiple-pathways_4.2.1.116_RXN-6383	1 3-hydroxypropanoyl-CoA <=> 1 H2O + 1 acryloyl-CoA
	3.1.2.4	beta-alanine-biosynthesis-II_3.1.2.4_RXN-6384	1 3-hydroxypropanoyl-CoA + 1 H2O --> 1 coenzyme_A + 1 3-hydroxypropionate + 1 H+
	1.1.1.59	acrylate-degradation_beta-alanine-biosynthesis_1.1.1.59_3-HYDROXYPROPIONATE-DEHYDROGENASE-RXN	1 3-hydroxypropionate + 1 NAD+ --> 1 H+ + 1 malonate_semialdehyde + 1 NADH
	2.6.1.18	beta-alanine-degradation_beta-alanine-biosynthesis_2.6.1.18_2.6.1.18-RXN	1 L-alanine + 1 malonate_semialdehyde <=> 1 beta-alanine + 1 pyruvate
	2.6.1.19	~multiple-pathways_2.6.1.19_BS353590	1 2-oxoglutarate + 1 beta-alanine <=> 1 L-glutamate + 1 malonate_semialdehyde
# purine metabolism
	2.4.2.14	~no-pathway_2.4.2.14_PRPPAMIDOTRANS-RXN	1 L-glutamate + 1 diphosphate + 1 5-phospho-beta-D-ribosyl-amine <-- 1 L-glutamine + 1 5-phospho-alpha-D-ribose_1-diphosphate + 1 H2O
	6.3.4.13	~no-pathway_6.3.4.13_GLYRIBONUCSYN-RXN	1 glycine + 1 5-phospho-beta-D-ribosyl-amine + 1 ATP --> 1 ADP + 1 H+ + 1 5-phospho-ribosyl-glycineamide + 1 phosphate
	6.3.5.3	~no-pathway_6.3.5.3_FGAMSYN-RXN	1 ATP + 1 L-glutamine + 1 5'-phosphoribosyl-N-formylglycineamide + 1 H2O --> 1 H+ + 1 ADP + 1 phosphate + 1 5-phosphoribosyl-N-formylglycineamidine + 1 L-glutamate
	6.3.3.1	~no-pathway_6.3.3.1_AIRS-RXN	1 ATP + 1 5-phosphoribosyl-N-formylglycineamidine --> 1 H+ + 1 phosphate + 1 ADP + 1 5-amino-1-(5-phospho-D-ribosyl)imidazole
	6.3.4.18	~no-pathway_6.3.4.18_RXN0-742	1 ATP + 1 5-amino-1-(5-phospho-D-ribosyl)imidazole + 1 bicarbonate --> 2 H+ + 1 phosphate + 1 N5-carboxyaminoimidazole_ribonucleotide + 1 ADP
	5.4.99.18	~no-pathway_5.4.99.18_RXN0-743	1 N5-carboxyaminoimidazole_ribonucleotide --> 1 5-amino-1-(5-phospho-D-ribosyl)imidazole-4-carboxylate
	6.3.2.6	~no-pathway_6.3.2.6_SAICARSYN-RXN	1 ATP + 1 5-amino-1-(5-phospho-D-ribosyl)imidazole-4-carboxylate + 1 L-aspartate --> 1 H+ + 1 ADP + 1 phosphate + 1 5'-phosphoribosyl-4-(N-succinocarboxamide)-5-aminoimidazole
	4.3.2.2	~no-pathway_4.3.2.2_AICARSYN-RXN	1 5'-phosphoribosyl-4-(N-succinocarboxamide)-5-aminoimidazole <=> 1 aminoimidazole_carboxamide_ribonucleotide + 1 fumarate
	2.1.2.3	~no-pathway_2.1.2.3_AICARTRANSFORM-RXN	1 10-formyl-tetrahydrofolate + 1 aminoimidazole_carboxamide_ribonucleotide <=> 1 phosphoribosyl-formamido-carboxamide + 1 tetrahydrofolate
	3.5.4.10	~no-pathway_3.5.4.10_2.1.2.3_IMPCYCLOHYDROLASE-RXN	1 IMP + 1 H2O <=> 1 phosphoribosyl-formamido-carboxamide
	6.3.4.4	purine-nucleotides-de-novo-biosynthesis-II_6.3.4.4_ADENYLOSUCCINATE-SYNTHASE-RXN	1 L-aspartate + 1 GTP + 1 IMP --> 1 GDP + 1 phosphate + 2 H+ + 1 adenylo-succinate
	4.3.2.2	purine-nucleotides-de-novo-biosynthesis-II_4.3.2.2_AMPSYN-RXN	1 adenylo-succinate <=> 1 fumarate + 1 AMP
	2.7.4.3	salvage-pathways-of-purine-and-pyrimidine-nucleotides_2.7.4.3_ADENYL-KIN-RXN	1 AMP + 1 ATP <=> 2 ADP
	1.17.4.1	~no-pathway_1.17.4.1_ADPREDUCT-RXN	1 dADP + 1 H2O + 1 |Ox-Thioredoxin| <-- 1 |Red-Thioredoxin| + 1 ADP
	2.7.4.6	~no-pathway_2.7.4.6_DADPKIN-RXN	1 dADP + 1 ATP --> 1 dATP + 1 ADP
	1.1.1.205	purine-nucleotides-de-novo-biosynthesis_urate-biosynthesis_1.1.1.205_IMP-DEHYDROG-RXN	1 NAD+ + 1 H2O + 1 IMP <=> 1 NADH + 1 H+ + 1 XMP
	6.3.5.2	purine-nucleotides-de-novo-biosynthesis-II_6.3.5.2_GMP-SYN-GLUT-RXN	1 XMP + 1 H2O + 1 ATP + 1 L-glutamine --> 1 L-glutamate + 1 diphosphate + 1 AMP + 2 H+ + 1 GMP
	2.7.4.8	salvage-pathways-of-purine-and-pyrimidine-nucleotides_2.7.4.8_GUANYL-KIN-RXN	1 ATP + 1 GMP --> 1 GDP + 1 ADP
	2.7.4.8	~no-pathway_2.7.4.8_GMKALT-RXN	1 ATP + 1 dGMP --> 1 dGDP + 1 ADP
	1.17.4.1	~no-pathway_1.17.4.1_GDPREDUCT-RXN	1 H2O + 1 dGDP + 1 |Ox-Thioredoxin| <-- 1 |Red-Thioredoxin| + 1 GDP
	2.7.4.6	~no-pathway_2.7.4.6_DGDPKIN-RXN	1 ATP + 1 dGDP --> 1 dGTP + 1 ADP
	2.7.4.6	ppGpp-biosynthesis_2.7.4.6_GDPKIN-RXN	1 GDP + 1 ATP --> 1 GTP + 1 ADP
	3.1.3.5	salvage-pathways-of-adenine,-hypoxanthine,-and-their-nucleosides_3.1.3.5_AMP-DEPHOSPHORYLATION-RXN	1 H2O + 1 AMP --> 1 phosphate + 1 adenosine
	3.1.3.5	~no-pathway_3.1.3.5_RXN-7609	1 H2O + 1 GMP --> 1 phosphate + 1 guanosine
	3.1.3.5	urate-biosynthesis_3.1.3.5_XMPXAN-RXN	1 H2O + 1 XMP --> 1 xanthosine + 1 phosphate
	3.1.3.5	~no-pathway_3.1.3.5_RXN-7607	1 IMP + 1 H2O --> 1 phosphate + 1 inosine
	3.1.3.5	~no-pathway_3.1.3.5_RXN-14161	1 H2O + 1 dAMP --> 1 phosphate + 1 deoxyadenosine
	3.1.3.6	~no-pathway_3.1.3.5_RXN-14142	1 dGMP + 1 H2O --> 1 phosphate + 1 deoxyguanosine
	2.4.2.1	purine-deoxyribonucleosides-degradation_2.4.2.1_DEOXYADENPHOSPHOR-RXN	1 deoxyadenosine + 1 phosphate <=> 1 adenine + 1 2-deoxy-alpha-D-ribose_1-phosphate
	2.4.2.1	purine-deoxyribonucleosides-degradation_2.4.2.1_DEOXYGUANPHOSPHOR-RXN	1 phosphate + 1 deoxyguanosine <=> 1 guanine + 1 2-deoxy-alpha-D-ribose_1-phosphate
	2.4.2.1	purine-deoxyribonucleosides-degradation_2.4.2.1_DEOXYINOPHOSPHOR-RXN	1 deoxyinosine + 1 phosphate <=> 1 hypoxanthine + 1 2-deoxy-alpha-D-ribose_1-phosphate
	2.4.2.1	~metabolism-of-purine_2.4.2.1_ADENPHOSPHOR-RXN	1 adenosine + 1 phosphate <=> 1 alpha-D-ribose-1-phosphate + 1 adenine
	2.4.2.1	~multiple-pathways_2.4.2.1_INOPHOSPHOR-RXN	1 phosphate + 1 inosine <=> 1 alpha-D-ribose-1-phosphate + 1 hypoxanthine
	2.4.2.1	~metabolism-of-purine_2.4.2.1_RXN0-5199	1 guanosine + 1 phosphate <=> 1 alpha-D-ribose-1-phosphate + 1 guanine
	2.4.2.1	~multiple-pathways_2.4.2.1_XANTHOSINEPHOSPHORY-RXN	1 xanthosine + 1 phosphate <=> 1 xanthine + 1 alpha-D-ribose-1-phosphate
	3.5.4.2	~no-pathway_3.5.4.2_ADENINE-DEAMINASE-RXN	1 adenine + 1 H2O --> 1 ammonia + 1 hypoxanthine
	3.5.4.3	purine-degradation_3.5.4.3_GUANINE-DEAMINASE-RXN	1 guanine + 1 H2O --> 1 xanthine + 1 ammonia
	2.4.2.7	~metabolism-of-salvage-pathways-purine_2.4.2.7_ADENPRIBOSYLTRAN-RXN	1 AMP + 1 diphosphate <-- 1 5-phospho-alpha-D-ribose_1-diphosphate + 1 adenine
	2.4.2.8	~no-pathway_2.4.2.8_HYPOXANPRIBOSYLTRAN-RXN	1 diphosphate + 1 IMP <-- 1 5-phospho-alpha-D-ribose_1-diphosphate + 1 hypoxanthine
	2.4.2.22	salvage-pathways-of-purine-and-pyrimidine-nucleotides_2.4.2.8_2.4.2.22_GUANPRIBOSYLTRAN-RXN	1 GMP + 1 diphosphate <-- 1 5-phospho-alpha-D-ribose_1-diphosphate + 1 guanine
	2.4.2.22	salvage-pathways-of-guanine,-xanthine,-and-their-nucleosides_2.4.2.8_2.4.2.22_XANPRIBOSYLTRAN-RXN	1 diphosphate + 1 XMP <-- 1 xanthine + 1 5-phospho-alpha-D-ribose_1-diphosphate
	1.17.1.4	~multiple-pathways_1.17.1.4_RXN0-901	1 NAD+ + 1 H2O + 1 xanthine <=> 1 H+ + 1 urate + 1 NADH
	1.17.1.4	~multiple-pathways_1.17.1.4_RXN-7682	1 hypoxanthine + 1 NAD+ + 1 H2O --> 1 NADH + 1 H+ + 1 xanthine
	3.6.1.19	~no-pathway_3.6.1.19_RXN0-1603	1 XTP + 1 H2O --> 1 H+ + 1 XMP + 1 diphosphate
	3.6.1.19	~no-pathway_3.6.1.19_RXN0-6382	1 ITP + 1 H2O --> 1 H+ + 1 diphosphate + 1 IMP
	3.6.1.19	~no-pathway_3.6.1.19_RXN-14140	1 GTP + 1 H2O --> 1 diphosphate + 1 H+ + 1 GMP
	3.6.1.19	~no-pathway_3.6.1.19_RXN0-385	1 dGTP + 1 H2O --> 1 H+ + 1 diphosphate + 1 dGMP
	3.6.1.19	~no-pathway_3.6.1.19_RXN-14215	1 H2O + 1 dADP --> 1 H+ + 1 phosphate + 1 dAMP
	3.6.1.19	~no-pathway_3.6.1.19_RXN0-384	1 dATP + 1 H2O --> 1 H+ + 1 diphosphate + 1 dAMP
	3.1.5.1	~no-pathway_3.1.5.1_DGTPTRIPHYDRO-RXN	1 dGTP + 1 H2O --> 1 H+ + 1 PPPi + 1 deoxyguanosine
	3.1.7.2	ppGpp-biosynthesis_3.1.7.2_PPGPPSYN-RXN	1 ppGpp + 1 H2O --> 1 H+ + 1 diphosphate + 1 GDP
	3.1.7.2	ppGpp-biosynthesis_3.1.7.2_RXN0-6427	1 H2O + 1 pppGpp --> 1 diphosphate + 1 H+ + 1 GTP
	2.7.6.5	ppGpp-biosynthesis_2.7.6.5_GDPPYPHOSKIN-RXN	1 GDP + 1 ATP --> 1 ppGpp + 1 AMP
	2.7.6.5	ppGpp-biosynthesis_2.7.6.5_GTPPYPHOSKIN-RXN	1 GTP + 1 ATP --> 1 pppGpp + 1 AMP
	3.6.1.40/3.6.3.11	ppGpp-biosynthesis_3.6.1.11_3.6.1.40_PPPGPPHYDRO-RXN	1 H2O + 1 pppGpp --> 1 H+ + 1 phosphate + 1 ppGpp
# pyrimidine metabolism
	2.1.3.2	de-novo-biosynthesis-of-uridine-5'-monophosphate_2.1.3.2_ASPCARBTRANS-RXN	1 carbamoyl-phosphate + 1 L-aspartate <=> 1 H+ + 1 N-carbamoyl-L-aspartate + 1 phosphate
	3.5.2.3	de-novo-biosynthesis-of-uridine-5'-monophosphate_3.5.2.3_DIHYDROOROT-RXN	1 (S)-dihydroorotate + 1 H2O <=> 1 H+ + 1 N-carbamoyl-L-aspartate
	1.3.5.2	de-novo-biosynthesis-of-uridine-5'-monophosphate_1.3.5.2_RXN0-6491	1 ubiquinone-10 + 1 (S)-dihydroorotate --> 1 ubiquinol-10 + 1 orotate
	2.4.2.10	de-novo-biosynthesis-of-uridine-5'-monophosphate_2.4.2.10_OROPRIBTRANS-RXN	1 orotidine-5'-phosphate + 1 diphosphate <=> 1 5-phospho-alpha-D-ribose_1-diphosphate + 1 orotate
	4.1.1.23	de-novo-biosynthesis-of-uridine-5'-monophosphate_4.1.1.23_OROTPDECARB-RXN	1 orotidine-5'-phosphate + 1 H+ --> 1 CO2 + 1 UMP
	2.7.4.6	de-novo-biosynthesis-of-pyrimidine-deoxyribonucleotides_2.7.4.6_DCDPKIN-RXN	1 ATP + 1 dCDP --> 1 dCTP + 1 ADP
	2.7.4.6	de-novo-biosynthesis-of-pyrimidine-deoxyribonucleotides_2.7.4.6_DTDPKIN-RXN	1 dTDP + 1 ATP --> 1 dTTP + 1 ADP
	2.7.4.6	de-novo-biosynthesis-of-pyrimidine-deoxyribonucleotides_2.7.4.6_DUDPKIN-RXN	1 dUDP + 1 ATP --> 1 dUTP + 1 ADP
	2.7.4.6	pyrimidine-ribonucleotides-interconversion_2.7.4.6_UDPKIN-RXN	1 ATP + 1 UDP --> 1 UTP + 1 ADP
	2.7.4.6	~metabolism-of-ribonucleotides-pyrimidine_2.7.4.6_CDPKIN-RXN	1 ATP + 1 CDP <=> 1 CTP + 1 ADP
	2.7.4.22	~no-pathway_2.7.4.22_2.7.4.25_RXN-12002	1 UMP + 1 ATP --> 1 UDP + 1 ADP
	6.3.4.2	pyrimidine-ribonucleotides-interconversion_6.3.4.2_CTPSYN-RXN	1 H2O + 1 ATP + 1 UTP + 1 L-glutamine --> 2 H+ + 1 ADP + 1 CTP + 1 L-glutamate + 1 phosphate
	1.8.1.9	thioredoxin-pathway_1.8.1.9_THIOREDOXIN-REDUCT-NADPH-RXN	1 |Red-Thioredoxin| + 1 NADP+ <-- 1 |Ox-Thioredoxin| + 1 H+ + 1 NADPH
	1.17.4.1	de-novo-biosynthesis-of-pyrimidine-deoxyribonucleotides_1.17.4.1_CDPREDUCT-RXN	1 H2O + 1 dCDP + 1 |Ox-Thioredoxin| <-- 1 |Red-Thioredoxin| + 1 CDP
	1.17.4.1	de-novo-biosynthesis-of-pyrimidine-deoxyribonucleotides_1.17.4.1_UDPREDUCT-RXN	1 H2O + 1 dUDP + 1 |Ox-Thioredoxin| <-- 1 UDP + 1 |Red-Thioredoxin|
	3.5.4.13	de-novo-biosynthesis-of-pyrimidine-deoxyribonucleotides_3.5.4.13_DCTP-DEAM-RXN	1 H2O + 1 dCTP --> 1 dUTP + 1 ammonia
	3.5.4.13	~no-pathway_3.5.4.13_3.5.4.5_RXN-14118	1 CTP + 1 H+ + 1 H2O --> 1 UTP + 1 ammonium
	3.6.1.19	~no-pathway_3.6.1.19_DCTP-PYROPHOSPHATASE-RXN	1 H2O + 1 dCTP --> 1 diphosphate + 1 H+ + 1 dCMP
	3.6.1.19	~no-pathway_3.6.1.19_RXN0-383	1 CTP + 1 H2O --> 1 CMP + 1 diphosphate + 1 H+
	3.6.1.19	~no-pathway_3.6.1.19_RXN0-5107	1 dTTP + 1 H2O --> 1 H+ + 1 dTMP + 1 diphosphate
	3.6.1.23	de-novo-biosynthesis-of-pyrimidine-deoxyribonucleotides_3.6.1.19_3.6.1.23_DUTP-PYROP-RXN	1 dUTP + 1 H2O --> 1 H+ + 1 diphosphate + 1 dUMP
	2.7.4.9	~metabolism-of-pyrimidine_2.7.4.9_DTMPKI-RXN	1 ATP + 1 dTMP --> 1 ADP + 1 dTDP
	2.7.4.9	~no-pathway_2.7.4.22_2.7.4.9_2.7.4.25_RXN-14122	1 dUMP + 1 ATP --> 1 dUDP + 1 ADP
	2.7.4.25	~metabolism-of-salvage-pathways-pyrimidine_2.7.4.25_RXN-11832	1 CMP + 1 ATP --> 1 CDP + 1 ADP
	2.7.4.25	~no-pathway_2.7.4.25_RXN-7913	1 dCMP + 1 ATP --> 1 dCDP + 1 ADP
	3.1.3.5	~no-pathway_3.1.3.5_THYMIDYLATE-5-PHOSPHATASE-RXN	1 dTMP + 1 H2O --> 1 thymidine + 1 phosphate
	3.1.3.5	~no-pathway_3.1.3.5_RXN-14026	1 H2O + 1 CMP --> 1 phosphate + 1 cytidine
	3.1.3.5	~no-pathway_3.1.3.5_RXN-14025	1 H2O + 1 UMP --> 1 phosphate + 1 uridine
	3.1.3.5	~no-pathway_3.1.3.5_RXN0-5292	1 dCMP + 1 H2O --> 1 phosphate + 1 deoxycytidine
	3.5.4.5	~metabolism-of-pyrimidine_3.5.4.5_CYTIDEAM-RXN	1 deoxycytidine + 1 H2O --> 1 ammonia + 1 deoxyuridine
	3.5.4.5	~metabolism-of-pyrimidine_3.5.4.5_CYTIDEAM2-RXN	1 H2O + 1 cytidine --> 1 uridine + 1 ammonia
	2.7.1.21	salvage-pathways-of-pyrimidine-deoxyribonucleotides_2.7.1.21_DURIDKI-RXN	1 deoxyuridine + 1 ATP --> 1 H+ + 1 dUMP + 1 ADP
	2.7.1.21	~metabolism-of-salvage-pathways-pyrimidine_2.7.1.21_THYKI-RXN	1 thymidine + 1 ATP --> 1 dTMP + 1 H+ + 1 ADP
	2.4.2.1	~metabolism-of-pyrimidine_2.4.2.1_2.4.2.4_URA-PHOSPH-RXN	1 phosphate + 1 deoxyuridine <=> 1 uracil + 1 2-deoxy-alpha-D-ribose_1-phosphate
	2.4.2.4	~metabolism-of-pyrimidine_2.4.2.4_THYM-PHOSPH-RXN	1 phosphate + 1 thymidine <=> 1 thymine + 1 2-deoxy-alpha-D-ribose_1-phosphate
	2.4.2.9	~metabolism-of-salvage-pathways-pyrimidine_2.4.2.9_URACIL-PRIBOSYLTRANS-RXN	1 diphosphate + 1 UMP <=> 1 uracil + 1 5-phospho-alpha-D-ribose_1-diphosphate
# methylerythritol phosphate pathway
	2.2.1.7	~multiple-pathways_2.2.1.7_DXS-RXN	1 pyruvate + 1 D-glyceraldehyde_3-phosphate + 1 H+ --> 1 CO2 + 1 1-deoxy-D-xylulose_5-phosphate
	1.1.1.267	methylerythritol-phosphate-pathway_1.1.1.267_DXPREDISOM-RXN	1 NADP+ + 1 2-C-methyl-D-erythritol_4-phosphate <=> 1 H+ + 1 NADPH + 1 1-deoxy-D-xylulose_5-phosphate
	2.7.7.60	methylerythritol-phosphate-pathway_2.7.7.60_2.7.7.60-RXN	1 2-C-methyl-D-erythritol_4-phosphate + 1 H+ + 1 CTP --> 1 4-(cytidine_5'-diphospho)-2-C-methyl-D-erythritol + 1 diphosphate
	2.7.1.148	methylerythritol-phosphate-pathway_2.7.1.148_2.7.1.148-RXN	1 4-(cytidine_5'-diphospho)-2-C-methyl-D-erythritol + 1 ATP --> 1 H+ + 1 2-phospho-4-(cytidine_5'-diphospho)-2-C-methyl-D-erythritol + 1 ADP
	4.6.1.12	methylerythritol-phosphate-pathway_4.6.1.12_RXN0-302	1 2-phospho-4-(cytidine_5'-diphospho)-2-C-methyl-D-erythritol --> 1 CMP + 1 2-C-methyl-D-erythritol-2,4-cyclodiphosphate
	1.17.7.1	methylerythritol-phosphate-pathway_1.17.7.1_RXN0-882	1 1-hydroxy-2-methyl-2-(E)-butenyl_4-diphosphate + 2 |Oxidized-flavodoxins| + 1 H2O <-- 1 H+ + 1 2-C-methyl-D-erythritol-2,4-cyclodiphosphate + 2 |Reduced-flavodoxins|
	1.17.1.2	methylerythritol-phosphate-pathway_1.17.1.2_ISPH2-RXN_NAD	1 NAD+ + 1 H2O + 1 isopentenyl_diphosphate <-- 1 H+ + 1 1-hydroxy-2-methyl-2-(E)-butenyl_4-diphosphate + 1 NADH
	1.17.1.2	methylerythritol-phosphate-pathway_1.17.1.2_ISPH2-RXN_NADP	1 H2O + 1 isopentenyl_diphosphate + 1 NADP+ <-- 1 H+ + 1 1-hydroxy-2-methyl-2-(E)-butenyl_4-diphosphate + 1 NADPH
	1.17.1.2	methylerythritol-phosphate-pathway_1.17.1.2_RXN0-884_NAD	1 H2O + 1 NAD+ + 1 dimethylallyl_diphosphate <-- 1 NADH + 1 H+ + 1 1-hydroxy-2-methyl-2-(E)-butenyl_4-diphosphate
	1.17.1.2	methylerythritol-phosphate-pathway_1.17.1.2_RXN0-884_NADP	1 NADP+ + 1 H2O + 1 dimethylallyl_diphosphate <-- 1 H+ + 1 1-hydroxy-2-methyl-2-(E)-butenyl_4-diphosphate + 1 NADPH
	5.3.3.2	~multiple-pathways_5.3.3.2_IPPISOM-RXN	1 isopentenyl_diphosphate <=> 1 dimethylallyl_diphosphate
	1.18.1.2	~no-pathway_1.18.1.2_FLAVONADPREDUCT-RXN	1 H+ + 1 NADPH + 1 |Oxidized-flavodoxins| <=> 1 |Reduced-flavodoxins| + 1 NADP+
# tetrahydrofolate biosynthesis
	2.1.1.45	~multiple-pathways_2.1.1.45_THYMIDYLATESYN-RXN	1 dUMP + 1 5,10-methylenetetrahydrofolate --> 1 dTMP + 1 7,8-dihydrofolate
	3.5.4.9	~multiple-pathways_3.5.4.9_METHENYLTHFCYCLOHYDRO-RXN	1 5,10-methenyltetrahydrofolate + 1 H2O <=> 1 H+ + 1 10-formyl-tetrahydrofolate
	2.1.2.2	~no-pathway_2.1.2.2_GART-RXN	1 5-phospho-ribosyl-glycineamide + 1 10-formyl-tetrahydrofolate <=> 1 H+ + 1 tetrahydrofolate + 1 5'-phosphoribosyl-N-formylglycineamide
	2.6.1.85	~no-pathway_2.6.1.85_PABASYN-RXN	1 chorismate + 1 L-glutamine <=> 1 L-glutamate + 1 4-amino-4-deoxychorismate
	4.1.3.38	~no-pathway_4.1.3.38_ADCLY-RXN	1 4-amino-4-deoxychorismate <=> 1 pyruvate + 1 4-aminobenzoate + 1 H+
	2.5.1.15	~no-pathway_2.5.1.15_H2PTEROATESYNTH-RXN	1 6-hydroxymethyl-dihydropterin_diphosphate + 1 4-aminobenzoate --> 1 diphosphate + 1 7,8-dihydropteroate
	6.3.2.12	formylTHF-biosynthesis-I_6.3.2.12_DIHYDROFOLATESYNTH-RXN	1 L-glutamate + 1 ATP + 1 7,8-dihydropteroate --> 1 ADP + 1 H+ + 1 phosphate + 1 7,8-dihydrofolate
	1.5.1.3	formylTHF-biosynthesis_1.5.1.3_DIHYDROFOLATEREDUCT-RXN	1 tetrahydrofolate + 1 NADP+ <-- 1 NADPH + 1 H+ + 1 7,8-dihydrofolate
	3.5.4.16	tetrahydrobioprein-biosynthesis_3.5.4.16_GTP-CYCLOHYDRO-I-RXN	1 H2O + 1 GTP --> 1 H+ + 1 formate + 1 7,8-dihydroneopterin_triphosphate
	3.6.1.-	~no-pathway_3.6.1.-_DIHYDRONEOPTERIN-MONO-P-DEPHOS-RXN	1 7,8-dihydroneopterin_3'-phosphate + 1 H2O --> 1 phosphate + 1 7,8-dihydro-D-neopterin
	3.6.1.-	~no-pathway_3.6.1.-_H2NEOPTERINP3PYROPHOSPHOHYDRO-RXN	1 7,8-dihydroneopterin_triphosphate + 1 H2O --> 1 diphosphate + 1 7,8-dihydroneopterin_3'-phosphate + 1 H+
	4.1.2.25	~no-pathway_4.1.2.25_H2NEOPTERINALDOL-RXN	1 7,8-dihydro-D-neopterin --> 1 6-hydroxymethyl-7,8-dihydropterin + 1 glycolaldehyde
	2.7.6.3	~no-pathway_2.7.6.3_H2PTERIDINEPYROPHOSPHOKIN-RXN	1 ATP + 1 6-hydroxymethyl-7,8-dihydropterin --> 1 H+ + 1 6-hydroxymethyl-dihydropterin_diphosphate + 1 AMP
	6.3.4.3	~multiple-pathways_6.3.4.3_FORMATETHFLIG-RXN	1 tetrahydrofolate + 1 formate + 1 ATP --> 1 10-formyl-tetrahydrofolate + 1 ADP + 1 phosphate
	1.5.1.5	~multiple-pathways_1.5.1.5_METHYLENETHFDEHYDROG-NADP-RXN	1 5,10-methylenetetrahydrofolate + 1 NADP+ <=> 1 NADPH + 1 5,10-methenyltetrahydrofolate
	1.5.1.20	formylTHF-biosynthesis_folate-transformations_1.5.1.20_1.5.1.20-RXN	1 5-methyl-tetrahydrofolate + 1 NAD+ <=> 1 NADH + 1 5,10-methylenetetrahydrofolate + 1 H+
	1.2.1.21	D-arabinose-degradation_ethylene-glycol-degradation_1.2.1.21_GLYCOLALD-DEHYDROG-RXN	1 H2O + 1 glycolaldehyde + 1 NAD+ --> 1 glycolate + 2 H+ + 1 NADH
	1.1.1.26	~metabolism-of-degradation_1.1.1.26_BR29285	1 glycolate + 1 NAD+ <=> 1 H+ + 1 NADH + 1 glyoxylate
# flavin biosynthesis
	3.5.4.25	flavin-biosynthesis_3.5.4.25_GTP-CYCLOHYDRO-II-RXN	3 H2O + 1 GTP --> 1 2,5-diamino-6-(5-phospho-D-ribosylamino)pyrimidin-4(3H)-one + 2 H+ + 1 formate + 1 diphosphate
	4.1.99.12	flavin-biosynthesis_4.1.99.12_DIOHBUTANONEPSYN-RXN	1 D-ribulose-5-phosphate --> 1 1-deoxy-L-glycero-tetrulose_4-phosphate + 1 H+ + 1 formate
	3.5.4.26	flavin-biosynthesis_3.5.4.26_RIBOFLAVINSYNDEAM-RXN	1 2,5-diamino-6-(5-phospho-D-ribosylamino)pyrimidin-4(3H)-one + 1 H2O --> 1 ammonia + 1 5-amino-6-(5-phospho-D-ribosylamino)uracil
	1.1.1.193	flavin-biosynthesis_1.1.1.193_RIBOFLAVINSYNREDUC-RXN	1 5-amino-6-(5-phospho-D-ribitylamino)uracil + 1 NADP+ <-- 1 NADPH + 1 H+ + 1 5-amino-6-(5-phospho-D-ribosylamino)uracil
		flavin_biosynthesis-RIBOPHOSPHAT-RXN	1 5-amino-6-(5-phospho-D-ribitylamino)uracil + 1 H2O --> 1 5-amino-6-(D-ribitylamino)uracil + 1 phosphate
	2.5.1.78	flavin-biosynthesis_2.5.1.78_LUMAZINESYN-RXN	1 5-amino-6-(D-ribitylamino)uracil + 1 1-deoxy-L-glycero-tetrulose_4-phosphate --> 1 H+ + 1 6,7-dimethyl-8-(1-D-ribityl)lumazine + 1 phosphate + 2 H2O
	2.5.1.9	flavin-biosynthesis_2.5.1.9_RIBOFLAVIN-SYN-RXN	2 6,7-dimethyl-8-(1-D-ribityl)lumazine + 1 H+ --> 1 riboflavin + 1 5-amino-6-(D-ribitylamino)uracil
	2.7.1.26	flavin-biosynthesis_5,6-dimethylbenzimidazole-biosynthesis_2.7.1.26_RIBOFLAVINKIN-RXN	1 riboflavin + 1 ATP --> 1 H+ + 1 FMN + 1 ADP
	2.7.7.2	flavin-biosynthesis_2.7.7.2_FADSYN-RXN	1 ATP + 2 H+ + 1 FMN --> 1 FAD + 1 diphosphate
# NAD(P) biosynthesis
	1.4.3.16	NAD-biosynthesis-I-(from-aspartate)_1.4.3.16_L-ASPARTATE-OXID-RXN	1 L-aspartate + 1 oxygen --> 1 H+ + 1 hydrogen_peroxide + 1 alpha-iminosuccinate
	2.5.1.72	NAD-biosynthesis-I-(from-aspartate)_2.5.1.72_QUINOLINATE-SYNTHA-RXN	1 dihydroxyacetone_phosphate + 1 alpha-iminosuccinate --> 2 H2O + 1 phosphate + 1 quinolinate
	2.4.2.19	NAD-biosynthesis-from-2-amino-3-carboxymuconate-semialdehyde_NAD-biosynthesis_2.4.2.19_QUINOPRIBOTRANS-RXN	2 H+ + 1 5-phospho-alpha-D-ribose_1-diphosphate + 1 quinolinate --> 1 diphosphate + 1 CO2 + 1 nicotinate_D-ribonucleotide
	2.7.7.18	~multiple-pathways_2.7.7.18_NICONUCADENYLYLTRAN-RXN	1 ATP + 1 nicotinate_D-ribonucleotide + 1 H+ --> 1 nicotinate_adenine_dinucleotide + 1 diphosphate
	6.3.5.1	~multiple-pathways_6.3.5.1_NAD-SYNTH-GLN-RXN	1 H2O + 1 nicotinate_adenine_dinucleotide + 1 ATP + 1 L-glutamine --> 1 L-glutamate + 1 NAD+ + 1 AMP + 1 H+ + 1 diphosphate
	2.7.1.23	~metabolism-of-phosphorylation-dephosphorylation_2.7.1.23_NAD-KIN-RXN	1 ATP + 1 NAD+ --> 1 H+ + 1 ADP + 1 NADP+
	1.6.1.2	NAD_NADP-1.6.1.2-RXN	1 NAD+ + 1 NADPH + 1 H+ <-- 1 NADH + 1 NADP+ + 1 H+_ex
# ubiquinol-10 biosynthesis
	2.5.1.1	~metabolism-of-biosynthesis_2.5.1.1_GPPSYN-RXN	1 dimethylallyl_diphosphate + 1 isopentenyl_diphosphate <=> 1 diphosphate + 1 geranyl_diphosphate
	2.5.1.10	~metabolism-of-biosynthesis_2.5.1.10_FPPSYN-RXN	1 isopentenyl_diphosphate + 1 geranyl_diphosphate <=> 1 diphosphate + 1 (2E,6E)-farnesyl_diphosphate
	2.5.1.91	all-trans-decaprenyl-diphosphate-biosynthesis_2.5.1.91_RXN-9106	7 isopentenyl_diphosphate + 1 (2E,6E)-farnesyl_diphosphate <=> 1 all-trans-decaprenyl_diphosphate + 7 diphosphate
	4.1.3.40	ubiquinol-8-biosynthesis_4-hydroxybenzoate-biosynthesis_4.1.3.40_CHORPYRLY-RXN	1 chorismate --> 1 pyruvate + 1 4-hydroxybenzoate
	2.5.1.39	ubiquinol-10-biosynthesis_2.5.1.39_RXN-9230	1 4-hydroxybenzoate + 1 all-trans-decaprenyl_diphosphate --> 1 diphosphate + 1 3-decaprenyl-4-hydroxybenzoate
	4.1.1.-	ubiquinol-10-biosynthesis-(prokaryotic)_4.1.1.-_RXN-9231	1 3-decaprenyl-4-hydroxybenzoate + 1 H+ --> 1 2-decaprenylphenol + 1 CO2
	1.14.13.-	ubiquinol-10-biosynthesis-(prokaryotic)_1.14.13.-_RXN-9232	1 oxygen + 1 NADPH + 1 H+ + 1 2-decaprenylphenol --> 1 NADP+ + 1 3-(all-trans-decaprenyl)benzene-1,2-diol + 1 H2O
	2.1.1.222	ubiquinol-10-biosynthesis-(prokaryotic)_2.1.1.222_RXN-9233	1 S-adenosyl-L-methionine + 1 3-(all-trans-decaprenyl)benzene-1,2-diol --> 1 2-methoxy-6-(all-trans-decaprenyl)phenol + 1 H+ + 1 S-adenosyl-L-homocysteine
	1.14.13.-	ubiquinol-10-biosynthesis_1.14.13.-_RXN-9234	1 NADPH + 1 2-methoxy-6-(all-trans-decaprenyl)phenol + 1 H+ + 1 oxygen --> 1 H2O + 1 NADP+ + 1 2-methoxy-6-all_trans-decaprenyl-2-methoxy-1,4-benzoquinol
	2.1.1.201	ubiquinol-10-biosynthesis_2.1.1.201_RXN-9235	1 2-methoxy-6-all_trans-decaprenyl-2-methoxy-1,4-benzoquinol + 1 S-adenosyl-L-methionine --> 1 H+ + 1 6-methoxy-3-methyl-2-all-trans-decaprenyl-1,4-benzoquinol + 1 S-adenosyl-L-homocysteine
	1.14.-.-	ubiquinol-10-biosynthesis_1.14.-.-_RXN-9236	1 oxygen + 1 NADPH + H+ + 1 6-methoxy-3-methyl-2-all-trans-decaprenyl-1,4-benzoquinol --> 1 3-demethylubiquinol-10 + 1 H2O + 1 NADP+
	2.1.1.64	ubiquinol-10-biosynthesis_2.1.1.64_RXN-9237	1 S-adenosyl-L-methionine + 1 3-demethylubiquinol-10 --> 1 ubiquinol-10 + 1 H+ + 1 S-adenosyl-L-homocysteine
# pantothenate biosynthesis
	2.1.2.11	phosphopantothenate-biosynthesis_2.1.2.11_3-CH3-2-OXOBUTANOATE-OH-CH3-XFER-RXN	1 2-oxoisovalerate + 1 5,10-methylenetetrahydrofolate + 1 H2O <=> 1 2-dehydropantoate + 1 tetrahydrofolate
	1.1.1.169	phosphopantothenate-biosynthesis_1.1.1.169_2-DEHYDROPANTOATE-REDUCT-RXN	1 (R)-pantoate + 1 NADP+ <-- 1 H+ + 1 NADPH + 1 2-dehydropantoate
	6.3.2.1	phosphopantothenate-biosynthesis-I_6.3.2.1_PANTOATE-BETA-ALANINE-LIG-RXN	1 ATP + 1 (R)-pantoate + 1 beta-alanine --> 1 (R)-pantothenate + 1 diphosphate + 1 AMP + 1 H+
# CoA biosynthesis
	2.7.1.33	phosphopantothenate-biosynthesis_2.7.1.33_PANTOTHENATE-KIN-RXN	1 (R)-pantothenate + 1 ATP --> 1 ADP + 1 H+ + 1 D-4'-phosphopantothenate
	6.3.2.5	coenzyme-A-biosynthesis_6.3.2.5_P-PANTOCYSLIG-RXN	1 L-cysteine + 1 D-4'-phosphopantothenate + 1 CTP --> 1 diphosphate + 1 H+ + 1 R-4'-phosphopantothenoyl-L-cysteine + 1 CMP
	4.1.1.36	coenzyme-A-biosynthesis_4.1.1.36_P-PANTOCYSDECARB-RXN	1 H+ + 1 R-4'-phosphopantothenoyl-L-cysteine --> 1 4'-phosphopantetheine + 1 CO2
	2.7.7.3	coenzyme-A-biosynthesis_2.7.7.3_PANTEPADENYLYLTRAN-RXN	1 ATP + 1 H+ + 1 4'-phosphopantetheine --> 1 3'-dephospho-CoA + 1 diphosphate
	2.7.1.24	coenzyme-A-biosynthesis_2.7.1.24_DEPHOSPHOCOAKIN-RXN	1 3'-dephospho-CoA + 1 ATP --> 1 H+ + 1 coenzyme_A + 1 ADP
# N-acetyl-glucosamine
	2.6.1.16	CMP-legionaminate-biosynthesis_UDP-N-acetyl-D-glucosamine-biosynthesis_2.6.1.16_L-GLN-FRUCT-6-P-AMINOTRANS-RXN	1 D-fructose-6-phosphate + 1 L-glutamine <=> 1 L-glutamate + 1 alpha-D-glucosamine_6-phosphate
	5.4.2.10	CMP-legionaminate-biosynthesis_UDP-N-acetyl-D-glucosamine-biosynthesis_5.4.2.10_5.4.2.10-RXN	1 D-glucosamine_1-phosphate <=> 1 alpha-D-glucosamine_6-phosphate
	2.3.1.157	UDP-N-acetyl-D-glucosamine-biosynthesis-I_2.3.1.157_2.3.1.157-RXN	1 acetyl-CoA + 1 D-glucosamine_1-phosphate --> 1 H+ + 1 N-acetyl-alpha-D-glucosamine_1-phosphate + 1 coenzyme_A
	2.7.7.23	~metabolism-of-biosynthesis_2.7.7.23_NAG1P-URIDYLTRANS-RXN	1 N-acetyl-alpha-D-glucosamine_1-phosphate + 1 UTP + 1 H+ --> 1 UDP-N-acetyl-alpha-D-glucosamine + 1 diphosphate
# peptidoglycan biosynthesis
	2.5.1.7	UDP-N-acetylmuramoyl-pentapeptide-biosynthesis_2.5.1.7_UDPNACETYLGLUCOSAMENOLPYRTRANS-RXN	1 phosphoenolpyruvate + 1 UDP-N-acetyl-alpha-D-glucosamine --> 1 UDP-N-acetyl-alpha-D-glucosamine-enolpyruvate + 1 phosphate
	1.3.1.98	UDP-N-acetylmuramoyl-pentapeptide-biosynthesis_1.3.1.98_UDPNACETYLMURAMATEDEHYDROG-RXN	1 NADP+ + 1 UDP-N-alpha-D-acetylmuramate <-- 1 H+ + 1 NADPH + 1 UDP-N-acetyl-alpha-D-glucosamine-enolpyruvate
	6.3.2.8	UDP-N-acetylmuramoyl-pentapeptide-biosynthesis_6.3.2.8_UDP-NACMUR-ALA-LIG-RXN	1 UDP-N-alpha-D-acetylmuramate + 1 L-alanine + 1 ATP --> 1 H+ + 1 phosphate + 1 ADP + 1 UDP-N-acetylmuramoyl-L-alanine
	5.1.1.3	UDP-N-acetylmuramoyl-pentapeptide-biosynthesis_5.1.1.3_GLUTRACE-RXN	1 L-glutamate <=> 1 D-glutamate
	6.3.2.9	UDP-N-acetylmuramoyl-pentapeptide-biosynthesis_6.3.2.9_UDP-NACMURALA-GLU-LIG-RXN	1 UDP-N-acetylmuramoyl-L-alanine + 1 ATP + 1 D-glutamate --> 1 H+ + 1 phosphate + 1 ADP + 1 UDP-N-acetylmuramoyl-L-alanyl--D-glutamate
	6.3.2.13	UDP-N-acetylmuramoyl-pentapeptide-biosynthesis-III-(meso-DAP-containing)_6.3.2.13_UDP-NACMURALGLDAPLIG-RXN	1 ATP + 1 meso-diaminopimelate + 1 UDP-N-acetylmuramoyl-L-alanyl--D-glutamate --> 1 phosphate + 1 ADP + 1 UDP-N-acetylmuramoyl-L-alanyl-gamma-D-glutamyl-meso-2,6-diaminopimelate + 1 H+
	5.1.1.1	alanine-degradation_alanine-biosynthesis_5.1.1.1_ALARACECAT-RXN	1 L-alanine <=> 1 D-alanine
	6.3.2.4	UDP-N-acetylmuramoyl-pentapeptide-biosynthesis_6.3.2.4_DALADALALIG-RXN	1 ATP + 2 D-alanine --> 1 phosphate + 1 H+ + 1 ADP + 1 D-alanyl-D-alanine
	6.3.2.10	UDP-N-acetylmuramoyl-pentapeptide-biosynthesis-III-(meso-DAP-containing)_6.3.2.10_UDP-NACMURALGLDAPAALIG-RXN	1 ATP + 1 UDP-N-acetylmuramoyl-L-alanyl-gamma-D-glutamyl-meso-2,6-diaminopimelate + 1 D-alanyl-D-alanine --> 1 ADP + 1 UDP-N-acetylmuramoyl-L-alanyl-gamma-D-glutamyl-meso-2,6-diaminopimelyl-D-alanyl-D-alanine + 1 H+ + 1 phosphate
	2.5.1.31	di-trans,poly-cis-undecaprenyl-phosphate-biosynthesis_2.5.1.31_RXN-8999	8 isopentenyl_diphosphate + 1 (2E,6E)-farnesyl_diphosphate <=> 8 diphosphate + 1 di-trans,octa-cis-undecaprenyl_diphosphate
	3.6.1.27	~no-pathway_3.6.1.27_UNDECAPRENYL-DIPHOSPHATASE-RXN	1 H2O + 1 di-trans,octa-cis-undecaprenyl_diphosphate --> 1 H+ + 1 phosphate + 1 di-trans,octa-cis-undecaprenyl_phosphate
	2.7.8.13	peptidoglycan-biosynthesis-I-(meso-diaminopimelate-containing)_2.7.8.13_PHOSNACMURPENTATRANS-RXN	1 UDP-N-acetylmuramoyl-L-alanyl-gamma-D-glutamyl-meso-2,6-diaminopimelyl-D-alanyl-D-alanine + 1 di-trans,octa-cis-undecaprenyl_phosphate --> 1 UMP + 1 undecaprenyldiphospho-N-acetylmuramoyl-L-alanyl-gamma-D-glutamyl-meso-2,6-diaminopimelyl-D-alanyl-D-alanine
	2.4.1.227	peptidoglycan-biosynthesis-I-(meso-diaminopimelate-containing)_2.4.1.227_NACGLCTRANS-RXN	1 undecaprenyldiphospho-N-acetylmuramoyl-L-alanyl-gamma-D-glutamyl-meso-2,6-diaminopimelyl-D-alanyl-D-alanine + 1 UDP-N-acetyl-alpha-D-glucosamine <=> 1 UDP + 1 H+ + 1 undecaprenyldiphospho-N-acetyl-(N-acetylglucosaminyl)muramoyl-L-alanyl-gamma-D-glutamyl-meso-2,6-diaminopimelyl-D-alanyl-D-alanine
	2.4.1.129	peptidoglycan-biosynthesis-I-(meso-diaminopimelate-containing)_2.4.1.129_RXN0-5405	2 undecaprenyldiphospho-N-acetyl-(N-acetylglucosaminyl)muramoyl-L-alanyl-gamma-D-glutamyl-meso-2,6-diaminopimelyl-D-alanyl-D-alanine --> 1 a_peptidoglycan_dimer_(meso-diaminopimelate_containing) + 1 di-trans,octa-cis-undecaprenyl_diphosphate + 1 H+
	3.4.16.4	peptidoglycan-biosynthesis-I-(meso-diaminopimelate-containing)_3.4.16.4_RXN-11302	2 a_peptidoglycan_dimer_(meso-diaminopimelate_containing) --> 1 a_peptidoglycan_with_D,D_cross-links_(meso-diaminopimelate_containing) + 1 D-alanine
# KDO-lipidA biosynthesis
	5.3.1.13	CMP-KDO-biosynthesis-I_5.3.1.13_DARAB5PISOM-RXN	1 D-arabinose_5-phosphate <=> 1 D-ribulose_5-phosphate
	2.5.1.55	CMP-KDO-biosynthesis_2.5.1.55_KDO-8PSYNTH-RXN	1 phosphoenolpyruvate + 1 D-arabinose_5-phosphate + 1 H2O --> 1 phosphate + 1 3-deoxy-D-manno-octulosonate_8-phosphate
	3.1.3.45	CMP-KDO-biosynthesis_3.1.3.45_KDO-8PPHOSPHAT-RXN	1 3-deoxy-D-manno-octulosonate_8-phosphate + 1 H2O --> 1 3-deoxy-D-manno-octulosonate + 1 phosphate
	2.7.7.38	CMP-KDO-biosynthesis_2.7.7.38_CPM-KDOSYNTH-RXN	1 3-deoxy-D-manno-octulosonate + 1 CTP --> 1 diphosphate + 1 CMP-3-deoxy-D-manno-octulosonate
	2.3.1.129	lipid-IVA-biosynthesis_2.3.1.129_UDPNACETYLGLUCOSAMACYLTRANS-RXN	1 (R)-3-hydroxy-tetradecanoyl-[ACP] + 1 UDP-N-acetyl-alpha-D-glucosamine --> 1 UDP-3-O-[(3R)-3-hydroxymyristoyl]-N-acetyl-alpha-D-glucosamine + ACP
	3.5.1.108	lipid-IVA-biosynthesis_3.5.1.108_UDPACYLGLCNACDEACETYL-RXN	1 UDP-3-O-[(3R)-3-hydroxymyristoyl]-N-acetyl-alpha-D-glucosamine + 1 H2O --> 1 UDP-3-O-(3-hydroxymyristoyl)-alpha-D-glucosamine + 1 acetate
	2.3.1.191	lipid-IVA-biosynthesis_2.3.1.191_UDPHYDROXYMYRGLUCOSAMNACETYLTRANS-RXN	1 UDP-3-O-(3-hydroxymyristoyl)-alpha-D-glucosamine + 1 (R)-3-hydroxy-tetradecanoyl-[ACP] --> 1 ACP + 1 H+ + 1 UDP-2,3-bis[O-(3R)-3-hydroxymyristoyl]-alpha-D-glucosamine
	3.6.1.54	lipid-IVA-biosynthesis_3.6.1.54_LIPIDXSYNTHESIS-RXN	1 H2O + 1 UDP-2,3-bis[O-(3R)-3-hydroxymyristoyl]-alpha-D-glucosamine --> 2 H+ + 1 UMP + 1 2,3-bis[(3R)-3-hydroxymyristoyl]-alpha-D-glucosaminyl_1-phosphate
	2.4.1.182	lipid-IVA-biosynthesis_2.4.1.182_LIPIDADISACCHARIDESYNTH-RXN	1 2,3-bis[(3R)-3-hydroxymyristoyl]-alpha-D-glucosaminyl_1-phosphate + 1 UDP-2,3-bis[O-(3R)-3-hydroxymyristoyl]-alpha-D-glucosamine --> 1 UDP + 1 lipid_A_disaccharide + 1 H+
	2.7.1.130	lipid-IVA-biosynthesis_2.7.1.130_TETRAACYLDISACC4KIN-RXN	1 lipid_A_disaccharide + 1 ATP --> 1 lipid_IVA + 1 H+ + 1 ADP
	2.4.99.12	KDO-transfer-to-lipid-IVA-I_2.4.99.12_2.4.99.13_KDOTRANS-RXN	1 CMP-3-deoxy-D-manno-octulosonate + 1 lipid_IVA --> 1 H+ + 1 alpha-Kdo-(2rarr6)-lipid_IVA + 1 CMP
	2.4.99.13	KDO-transfer-to-lipid-IVA-I_2.4.99.13_KDOTRANS2-RXN	1 CMP-3-deoxy-D-manno-octulosonate + 1 alpha-Kdo-(2rarr6)-lipid_IVA --> 1 alpha-Kdo-(2->4)-alpha-Kdo-(2->6)-lipid_IVA + 1 H+ + 1 CMP
	2.3.1.-	superpathway-of-(KDO)2-lipid-A-biosynthesis_(KDO)2-lipid-A-biosynthesis_2.3.1.-_LAUROYLACYLTRAN-RXN	1 alpha-Kdo-(2->4)-alpha-Kdo-(2->6)-lipid_IVA + 1 Dodecanoyl-[ACP] --> 1 ACP + 1 (KDO)2-(lauroyl)-lipid_IVA
	2.3.1.-	superpathway-of-(KDO)2-lipid-A-biosynthesis_(KDO)2-lipid-A-biosynthesis_2.3.1.-_MYRISTOYLACYLTRAN-RXN	1 (KDO)2-(lauroyl)-lipid_IVA + 1 Tetradecanoyl-[ACP] --> 1 (KDO)2-lipid_A + 1 ACP
	5.4.2.2	~multiple-pathways_5.4.2.2_PHOSPHOGLUCMUT-RXN	1 alpha-D-glucose_1-phosphate <=> 1 alpha-D-glucose_6-phosphate
	2.7.7.9	~multiple-pathways_2.7.7.9_GLUC1PURIDYLTRANS-RXN	1 H+ + 1 alpha-D-glucose_1-phosphate + 1 UTP <=> 1 UDP-alpha-D-glucose + 1 diphosphate
# detoxification
	6.3.2.2	~metabolism-of-biosynthesis_6.3.2.2_GLUTCYSLIG-RXN	1 L-cysteine + 1 ATP + 1 L-glutamate --> 1 H+ + 1 L-gamma-glutamylcysteine + 1 phosphate + 1 ADP
	6.3.2.3	glutathione-biosynthesis_6.3.2.3_GLUTATHIONE-SYN-RXN	1 glycine + 1 L-gamma-glutamylcysteine + 1 ATP --> 1 ADP + 1 phosphate + 1 glutathione + 1 H+
	1.11.1.21	methanol-oxidation-to-formaldehyde_superoxide-radicals-degradation_1.11.1.21_CATAL-RXN	2 hydrogen_peroxide --> 1 oxygen + 2 H2O
	1.14.12.17	~no-pathway_1.14.12.17_R621-RXN_NAD	1 NADH + 2 nitric_oxide + 2 oxygen --> 1 NAD+ + 2 nitrate + 1 H+
	1.14.12.17	~no-pathway_1.14.12.17_R621-RXN_NADP	2 nitric_oxide + 2 oxygen + 1 NADPH --> 2 nitrate + 1 NADP+ + 1 H+
	1.7.2.1	~multiple-pathways_1.7.2.1_NITRITE-REDUCTASE-CYTOCHROME-RXN	1 nitric_oxide + 1 H2O + 1 |Cytochromes-C-Oxidized| <=> 1 |Cytochromes-C-Reduced| + 1 nitrite + 2 H+
	1.7.2.5	nitrate-reduction_nitrifier-denitrification_1.7.2.5_NITRIC-OXIDE-REDUCTASE-RXN	1 nitrous_oxide + 2 |Cytochromes-C-Oxidized| + 1 H2O <=> 2 |Cytochromes-C-Reduced| + 2 H+ + 2 nitric_oxide
# TDA biosynthesis
		TDA_biosynthesis-RXN	3-oxo-5,6-dehydrosuberyl-CoA_semialdehyde + 2 L-cysteine + 2 H2O + 4 NAD+ --> 1 TDA + 2 L-serine + 1 coenzyme_A + 4 NADH + 4 H+
# sulfate assimilation
	1.8.1.2	sulfate-reduction-I-(assimilatory)_1.8.1.2_SULFITE-REDUCT-RXN	3 NADP+ + 3 H2O + 1 hydrogen_sulfide <=> 5 H+ + 3 NADPH + 1 sulfite
	2.8.1.1	thiosulfate-disproportionation-III-(rhodanese)_2.8.1.1_THIOSULFATE-SULFURTRANSFERASE-RXN	1 hydrogen_cyanide + 1 thiosulfate <=> 1 sulfite + 2 H+ + 1 thiocyanate
	2.7.7.4	~multiple-pathways_2.7.7.4_SULFATE-ADENYLYLTRANS-RXN	1 ATP + 1 sulfate + 1 H+ <=> 1 diphosphate + 1 adenosine_5'-phosphosulfate
	2.7.1.25	sulfate-activation-for-sulfonation_2.7.1.25_ADENYLYLSULFKIN-RXN	1 adenosine_5'-phosphosulfate + 1 ATP --> 1 phosphoadenosine-5'-phosphosulfate + 1 H+ + 1 ADP
	1.8.4.8	sulfate-reduction-I-(assimilatory)_1.8.4.8_1.8.4.8-RXN	1 |Ox-Thioredoxin| + 2 H+ + 1 adenosine_3',5'-bisphosphate + 1 sulfite <=> 1 |Red-Thioredoxin| + 1 phosphoadenosine-5'-phosphosulfate
	3.1.3.7	~no-pathway_3.1.3.7_325-BISPHOSPHATE-NUCLEOTIDASE-RXN	1 adenosine_3',5'-bisphosphate + 1 H2O --> 1 phosphate + 1 AMP
# amino acid degradation
	# tryptophan degradation
	1.13.11.11	~metabolism-of-tryptophan-degradation_1.13.11.11_RXN-8665	1 oxygen + 2 H+ + 1 L-tryptophan --> 1 N-formylkynurenine
	3.5.1.9	~metabolism-of-tryptophan-degradation_3.5.1.9_ARYLFORMAMIDASE-RXN	1 N-formylkynurenine + 1 H2O --> 1 formate + 3 H+ + 1 L-kynurenine
	3.7.1.3	tryptophan-degradation_3.7.1.3_KYNURENINASE-RXN	1 L-kynurenine + 1 H2O --> 1 L-alanine + 1 H+ + 1 anthranilate
	1.4.1.1	alanine-degradation-IV_1.4.1.1_ALANINE-DEHYDROGENASE-RXN	1 H2O + 1 L-alanine + 1 NAD+ <=> 1 H+ + 1 NADH + 1 ammonium + 1 pyruvate
	6.2.1.32	~multiple-pathways_6.2.1.32_AMINOBENZCOALIG-RXN	1 ATP + 1 anthranilate + 1 coenzyme_A --> 1 diphosphate + 1 2-aminobenzoyl-CoA + 1 AMP
	1.14.13.40	anthranilate-degradation-II-(aerobic)_1.14.13.40_ANTHRANILOYL-COA-MONOOXYGENASE-RXN_NAD	2 NADH + 2 H+ + 1 oxygen + 1 2-aminobenzoyl-CoA --> 1 2-amino-5-oxocyclohex-1-enecarboxyl-CoA + 1 H2O + 2 NAD+
	1.14.13.40	anthranilate-degradation-II-(aerobic)_1.14.13.40_ANTHRANILOYL-COA-MONOOXYGENASE-RXN_NADP	2 H+ + 2 NADPH + 1 oxygen + 1 2-aminobenzoyl-CoA --> 1 2-amino-5-oxocyclohex-1-enecarboxyl-CoA + 2 NADP+ + 1 H2O
		tryptophan-degradation-beta-oxidation_RXN
	# phenylalanine degradation
	2.6.1.57	phenylalanine-degradation_2.6.1.57_PHEAMINOTRANS-RXN	1 L-glutamate + 1 2-oxo-3-phenylpropanoate <=> 1 L-phenylalanine + 1 2-oxoglutarate
	1.2.7.8	phenylalanine_degra_1.2.7.8_-RXN	1 |Oxidized-ferredoxins| + 1 2-oxo-3-phenylpropanoate + 1 coenzyme_A --> 1 phenylacetyl-CoA + 1 CO2 + 1 |Reduced-ferredoxins|
	1.14.13.149	phenylacetate-degradation-I-(aerobic)_1.14.13.149_RXN0-2042	1 phenylacetyl-CoA + 1 H+ + 1 oxygen + 1 NADPH --> 1 H2O + 1 2-(1,2-epoxy-1,2-dihydrophenyl)acetyl-CoA + 1 NADP+
	5.3.3.18	phenylacetate-degradation-I-(aerobic)_5.3.3.18_RXN0-6510	1 2-(1,2-epoxy-1,2-dihydrophenyl)acetyl-CoA <=> 1 2-oxepin-2(3H)-ylideneacetyl-CoA
	3.3.2.12	phenylacetate-degradation-I-(aerobic)_3.3.2.12_RXNMETA-12671	1 2-oxepin-2(3H)-ylideneacetyl-CoA + 1 H2O --> 1 3-oxo-5,6-dehydrosuberyl-CoA_semialdehyde
	1.17.1.7	phenylacetate-degradation-I-(aerobic)_1.17.1.7_RXNMETA-12672	1 H2O + 1 3-oxo-5,6-dehydrosuberyl-CoA_semialdehyde + 1 NADP+ --> 1 NADPH + 2 H+ + 1 3-oxo-5,6-didehydrosuberyl-CoA
	2.3.1.174	phenylacetate-degradation-I-(aerobic)_2.3.1.223_RXN0-6512	1 acetyl-CoA + 1 2,3-didehydroadipyl-CoA <-- 1 coenzyme_A + 1 3-oxo-5,6-didehydrosuberyl-CoA
	4.2.1.17/4.2.1.55	phenylacetate-degradation-I-(aerobic)_4.2.1.17_RXN0-6513	1 3-hydroxyadipyl-CoA <=> 1 2,3-didehydroadipyl-CoA + 1 H2O
	1.1.1.157/1.1.1.35	benzoyl-CoA-degradation_phenylacetate-degradation_1.1.1.35_RXN0-2044	1 3-hydroxyadipyl-CoA + 1 NAD+ <=> 1 H+ + 1 NADH + 1 3-oxoadipyl-CoA
	2.3.1.174	~metabolism-of-degradation_2.3.1.174_RXN-3641	1 acetyl-CoA + 1 succinyl-CoA <-- 1 coenzyme_A + 1 3-oxoadipyl-CoA
	1.18.1.2	ubiquinol-6-biosynthesis-from-4-aminobenzoate_1.18.1.2_1.18.1.2-RXN	1 NADP+ + 2 |Reduced-ferredoxins| + 1 H+ --> 1 NADPH + 2 |Oxidized-ferredoxins|
	1.13.11.27	phenylalanine-degra_1.13.11.27_4-HYDROXYPHENYLPYRUVATE-DIOXYGENASE-RXN	1 2-oxo-3-phenylpropanoate + 1 oxygen --> 1 2-hydroxyphenylacetate + 1 CO2
	3.2.1.-	phenylalanine_degra_3.2.1.-_THIOESTERASE-RXN	1 phenylacetyl-CoA + 1 H2O --> 1 phenylacetate + 1 coenzyme_A + 1 H+
	6.2.1.30	phenylacetate-degradation_phenylalanine-degradation_6.2.1.30_RXN-10819	1 coenzyme_A + 1 phenylacetate + 1 ATP --> 1 diphosphate + 1 AMP
	3.2.1.-	phenylalanine_degra_3.2.1.-_THIOESTERASE2-RXN	1 2-(1,2-epoxy-1,2-dihydrophenyl)acetyl-CoA + 1 H2O --> 1 2-(1,2-epoxy-1,2-dihydrophenyl)acetate + 1 coenzyme_A + 1 H+
		phenylalanine_degra_spontaneous-RXN	1 2-(1,2-epoxy-1,2-dihydrophenyl)acetate --> 1 2-hydroxyphenylacetate
	# methionine degradation
	4.4.1.11	methionine-degradation-II_4.4.1.11_METHIONINE-GAMMA-LYASE-RXN	1 L-methionine + 1 H2O <=> 1 methanethiol + 1 ammonium + 1 2-oxobutanoate
	1.2.4.1/2.3.1.12/1.8.1.4	2-oxobutanoate-degradation_PDH-RXN	1 2-oxobutanoate + 1 NAD+ + 1 coenzyme_A --> 1 propanoyl-CoA + 1 NADH + 1 CO2
	# leucine degradation
	1.4.1.9	~no-pathway_1.4.1.9_LEUCINE-DEHYDROGENASE-RXN	1 NAD+ + 1 H2O + 1 L-leucine <=> 1 NADH + 1 ammonium + 1 H+ + 1 4-methyl-2-oxopentanoate
	1.2.7.8	leucine-degra_1.2.7.8-RXN	1 4-methyl-2-oxopentanoate + 1 coenzyme_A + 1 |Oxidized-ferredoxins| --> 1 |Reduced-ferredoxins| + 1 isovaleryl-CoA + 1 CO2
	1.3.8.4	~no-pathway_1.3.8.4_RXN-14264	1 isovaleryl-CoA + 1 FAD + 1 H+ <=> 1 3-methylcrotonyl-CoA + 1 FADH2
	6.4.1.4	leucine-degradation-I_6.4.1.4_METHYLCROTONYL-COA-CARBOXYLASE-RXN	1 3-methylcrotonyl-CoA + 1 bicarbonate + 1 ATP --> 1 phosphate + 1 3-methylglutaconyl-CoA + 1 H+ + 1 ADP
	4.2.1.18	leucine-degradation-I_4.2.1.18_METHYLGLUTACONYL-COA-HYDRATASE-RXN	1 (S)-3-hydroxy-3-methylglutaryl-CoA <=> 1 3-methylglutaconyl-CoA + 1 H2O
	4.1.3.4	~multiple-pathways_4.1.3.4_HYDROXYMETHYLGLUTARYL-COA-LYASE-RXN	1 (S)-3-hydroxy-3-methylglutaryl-CoA --> 1 acetoacetate + 1 acetyl-CoA
	2.8.3.5	TCA-cycle_2.8.3.5_RXNI-2	1 acetoacetate + 1 succinyl-CoA <=> 1 succinate + 1 acetoacetyl-CoA
	# isoleucine degradation
	1.4.1.9	~no-pathway_1.4.1.9_ILEDEAMINE-RXN	1 H2O + 1 NAD+ + 1 L-isoleucine --> 1 H+ + 1 (S)-3-methyl-2-oxopentanoate + 1 ammonium + 1 NADH
	2.6.1.42	isoleucine-degradation_2.6.1.42_BRANCHED-CHAINAMINOTRANSFERILEU-RXN	1 2-oxoglutarate + 1 L-isoleucine <=> 1 L-glutamate + 1 (S)-3-methyl-2-oxopentanoate
	1.2.7.8	isoleucine-degra_1.2.7.8-RXN	1 (S)-3-methyl-2-oxopentanoate + 1 coenzyme_A + 1 |Oxidized-ferredoxins| --> 1 |Reduced-ferredoxins| + 1 2-methylbutanoyl-CoA + 1 CO2
	1.3.8.4	isoleucine-degra_1.3.8.4_RXN-14264	1 FAD + 1 H+ + 1 2-methylbutanoyl-CoA <=> 1 (E)-2-methylcrotonoyl-CoA + 1 FADH2
	4.2.1.17	isoleucine-degradation_2-methylbutyrate-biosynthesis_4.2.1.17_TIGLYLCOA-HYDROXY-RXN	1 2-methyl-3-hydroxybutyryl-CoA <=> 1 (E)-2-methylcrotonoyl-CoA + 1 H2O
	1.1.1.178	isoleucine-degradation_2-methylbutyrate-biosynthesis_1.1.1.178_1.1.1.178-RXN	1 2-methyl-3-hydroxybutyryl-CoA + 1 NAD+ <=> 1 NADH + 1 H+ + 1 2-methylacetoacetyl-CoA
	2.3.1.9	isoleucine-degradation_2-methylbutyrate-biosynthesis_2.3.1.9_METHYLACETOACETYLCOATHIOL-RXN	1 2-methylacetoacetyl-CoA + 1 coenzyme_A <=> 1 propanoyl-CoA + 1 acetyl-CoA
	# valine degradation
	1.4.1.9	~no-pathway_1.4.1.9_RXN-13184	1 NAD+ + 1 L-valine + 1 H2O <=> 1 ammonium + 1 3-methyl-2-oxobutanoate + 1 H+ + 1 NADH
	2.6.1.42	valine-degra_2.6.1.42_BRANCHED-CHAINAMINOTRANSFERVAL-RXN	1 2-oxoglutarate + 1 L-valine <=> 1 L-glutamate + 1 3-methyl-2-oxobutanoate
	1.2.7.8	valine-degra_1.2.7.8_1.2.7.8-RXN	1 coenzyme_A + 1 3-methyl-2-oxobutanoate + 1 |Oxidized-ferredoxins| --> 1 isobutanoyl-CoA + 1 CO2 + 1 |Reduced-ferredoxins|
	1.3.8.-/1.3.99.-	valine-degra_1.3.8.4_RXN-14264	1 isobutanoyl-CoA + 1 FAD + 1 H+ <=> 1 FADH2 + 1 methylacrylyl-CoA
	4.2.1.17	valine-degradation-I_4.2.1.17_METHYLACYLYLCOA-HYDROXY-RXN	1 (S)-3-hydroxy-isobutanoyl-CoA <=> 1 methylacrylyl-CoA + 1 H2O
	3.1.2.4	valine-degradation-I_3.1.2.4_3-HYDROXYISOBUTYRYL-COA-HYDROLASE-RXN	1 (S)-3-hydroxy-isobutanoyl-CoA + 1 H2O --> 1 H+ + 1 (S)-3-hydroxy-isobutanoate + 1 coenzyme_A
	1.1.1.31	valine-degradation-I_1.1.1.31_3-HYDROXYISOBUTYRATE-DEHYDROGENASE-RXN	1 NAD+ + 1 (S)-3-hydroxy-isobutanoate --> 1 H+ + 1 NADH + 1 (S)-methylmalonate-semialdehyde
	1.2.1.27	2,4-dinitrotoluene-degradation_1.2.1.27_1.2.1.27-RXN	1 (S)-methylmalonate-semialdehyde + 1 coenzyme_A + 1 NAD+ + 1 H2O --> 1 bicarbonate + 1 NADH + 1 propanoyl-CoA + 1 H+
	# histidine degradation
	4.3.1.3	histidine-degradation_4.3.1.3_HISTIDINE-AMMONIA-LYASE-RXN	1 L-histidine --> 1 urocanate + 1 ammonium
	4.2.1.49	histidine-degradation_4.2.1.49_UROCANATE-HYDRATASE-RXN	1 4-imidazolone-5-propionate <-- 1 urocanate + 1 H2O
	3.5.2.7	histidine-degradation_3.5.2.7_IMIDAZOLONEPROPIONASE-RXN	1 4-imidazolone-5-propionate + 1 H2O --> 1 N-formimino-L-glutamate
	3.5.3.13	histidine-degradation-II_3.5.3.13_FORMIMINOGLUTAMATE-DEIMINASE-RXN	1 N-formimino-L-glutamate + 1 H2O --> 1 ammonium + 1 N-formyl-L-glutamate
	3.5.1.68	histidine-degradation-II_3.5.1.68_N-FORMYLGLUTAMATE-DEFORMYLASE-RXN	1 N-formyl-L-glutamate + 1 H2O --> 1 L-glutamate + 1 formate
	# lysine degradation
	4.1.1.17	~multiple-pathways_4.1.1.18_LYSDECARBOX-RXN	1 L-lysine + 1 H+ --> 1 CO2 + 1 cadaverine
	2.6.1.-	lysine-degradation-X_2.6.1.-_RXN-10853	1 cadaverine + 1 pyruvate --> 1 H+ + 1 L-alanine + 1 H2O + 1 1-piperideine
	2.6.1.-	lysine-degra_2.6.1.-_RXN	1 cadaverine + 1 pyruvate --> 1 L-alanine + 1 5-aminopentanal
	1.5.1.-	lysine-degradation-X_1.5.1.-_RXN-10854	1 1-piperideine + 1 NAD+ + 2 H2O --> 1 NADH + 1 H+ + 1 5-aminopentanoate
	1.2.1.-	lysine-degra_1.2.1.-_RXN	1 5-aminopentanal + 1 NAD+ + 1 H2O --> 1 5-aminopentanoate + 1 NADH + 1 H+
	2.6.1.-	lysine-degradation_2.6.1.48_VAGL-RXN	1 pyruvate + 1 5-aminopentanoate --> 1 L-alanine + 1 glutarate_semialdehyde
	1.2.1.-	lysine-degradation_1.2.1.-_RXN-8182	1 glutarate_semialdehyde + 1 H2O + 1 NADP+ --> 1 glutarate + 1 NADPH + 2 H+
	2.8.3.13	lysine-degradation_2.8.3.13_RXN-14724	1 succinyl-CoA + 1 glutarate --> 1 succinate + 1 glutaryl-CoA
	2.6.1.36	lysine-degradation-VI_2.6.1.36_L-LYSINE-AMINOTRANSFERASE-RXN	1 pyruvate + 1 L-lysine --> 1 (S)-2-amino-6-oxohexanoate + 1 L-alanine
		spontaneous_lysine-degradation_lysine-biosynthesis_1.4.1.18_RXN-8173	1 (S)-2-amino-6-oxohexanoate <=> 1 H2O + 1 (S)-2,3,4,5-tetrahydropiperidine-2-carboxylate + 1 H+
	1.2.1.-	lysine-degradation_1.2.1.-_RXN-8162	1 (S)-2,3,4,5-tetrahydropiperidine-2-carboxylate + 1 NAD+ + 2 H2O --> 1 H+ + 1 L-2-aminoadipate + 1 NADH
	2.6.1.39	lysine-degradation_lysine-biosynthesis_2.6.1.39_2-AMINOADIPATE-AMINOTRANSFERASE-RXN	1 pyruvate + 1 L-2-aminoadipate <=> 1 L-alanine + 1 2-oxoadipate
	1.2.4.4	lysine-degra_1.2.4.4._RXN	1 2-oxoadipate + 1 NAD+ + 1 coenzyme_A --> 1 glutaryl-CoA + 1 NADH + 1 H+ + 1 CO2
	1.3.8.6	~no-pathway_1.3.8.6_RXN-14211	2 H+ + 1 glutaryl-CoA + 1 FAD --> 1 crotonyl-CoA + 1 CO2 + 1 FADH2
	4.3.1.28	~no-pathway_4.3.1.28_RXN-13654	1 L-lysine <=> 1 L-pipecolate + 1 ammonium
	1.5.3.7	lysine-degradation-V_1.5.3.7_L-PIPECOLATE-OXIDASE-RXN	1 L-pipecolate + 1 oxygen --> 1 hydrogen_peroxide + 1 H+ + 1 (S)-2,3,4,5-tetrahydropiperidine-2-carboxylate
	# threonine degradation
	1.1.1.103	threonine-degradation_aminopropanol-phosphate-biosynthesis_1.1.1.103_THREODEHYD-RXN	1 L-threonine + 1 NAD+ --> 2 H+ + 1 NADH + 1 2-amino-3-oxobutanoate
	2.3.1.29	threonine-degradation-II_2.3.1.29_AKBLIG-RXN	1 acetyl-CoA + 1 glycine <=> 1 H+ + 1 coenzyme_A + 1 2-amino-3-oxobutanoate
	1.4.4.2/2.1.2.10/1.8.1.4	~multiple-pathways_1.8.1.4_1.4.4.2_2.1.2.10_GCVMULTI-RXN	1 tetrahydrofolate + 1 NAD+ + 1 glycine --> 1 ammonium + 1 NADH + 1 5,10-methylenetetrahydrofolate + 1 CO2
	4.3.1.17	~metabolism-of-degradation_4.3.1.17_4.3.1.17-RXN	1 L-serine --> 1 ammonium + 1 pyruvate
	# arginine and proline degradation
	3.5.3.1	~multiple-pathways_3.5.3.1_ARGINASE-RXN	1 L-arginine + 1 H2O --> 1 urea + 1 L-ornithine
	4.1.1.17	putrescine-biosynthesis_superpathway-of-ornithine-degradation_4.1.1.17_ORNDECARBOX-RXN	: 1 L-ornithine + 1 H+ --> 1 putrescine + 1 CO2
	4.3.1.12	arginine-degradation_ornithine-degradation_4.3.1.12_ORNITHINE-CYCLODEAMINASE-RXN	1 L-ornithine --> 1 L-proline + 1 ammonium
	1.5.5.2	~multiple-pathways_1.5.99.8_RXN-821	1 L-proline + 1 ubiquinone-10 --> 1 (S)-1-pyrroline-5-carboxylate + 1 H+ + 1 ubiquinol-10
		spontaneous_multiple-pathways_SPONTPRO-RXN	1 (S)-1-pyrroline-5-carboxylate + 1 H+ + 1 H2O <=> 1 L-glutamate-5-semialdehyde
	1.2.1.88	~multiple-pathways_1.2.1.88_RXN-14116	1 L-glutamate-5-semialdehyde + 1 NAD+ + 1 H2O <=> 1 NADH + 1 L-glutamate + 2 H+
	1.13.12.1	arginine-degradation-X-(arginine-monooxygenase-pathway)_1.13.12.1_ARGININE-2-MONOOXYGENASE-RXN	1 L-arginine + 1 oxygen --> 1 H2O + 1 4-guanidinobutyramide + 1 CO2
	3.5.1.4	arginine-degradation-X-(arginine-monooxygenase-pathway)_3.5.1.4_GUANIDINOBUTANAMIDE-NH3-RXN	1 4-guanidinobutyramide + 1 H2O --> 1 ammonium + 1 4-guanidinobutyrate
	3.5.3.7	arginine-degradation_3.5.3.7_GUANIDINOBUTYRASE-RXN	1 4-guanidinobutyrate + 1 H2O --> 1 4-aminobutanoate + 1 urea
	# cysteine degradation
	2.6.1.1	hydrogen-sulfide-biosynthesis_L-cysteine-degradation_2.6.1.1_CYSTEINE-AMINOTRANSFERASE-RXN	1 2-oxoglutarate + 1 L-cysteine <=> 1 L-glutamate + 1 3-mercaptopyruvate
	2.8.1.2	TCA-cycle_2.8.1.2_BR48100	1 3-mercaptopyruvate + 1 hydrogen_cyanide <=> 1 thiocyanate + 1 pyruvate + 1 H+
	4.4.1.1	L-cysteine-degradation-II_4.4.1.1_LCYSDESULF-RXN	1 H2O + 1 L-cysteine --> 1 hydrogen_sulfide + 1 pyruvate + 1 ammonium
	# tyrosine degradation
	1.13.11.27	~multiple-pathways_1.13.11.27_4-HYDROXYPHENYLPYRUVATE-DIOXYGENASE-RXN	1 oxygen + 1 4-hydroxyphenylpyruvate --> 1 homogentisate + 1 CO2
	1.13.11.5	tyrosine-degradation-I_1.13.11.5_HOMOGENTISATE-12-DIOXYGENASE-RXN	1 homogentisate + 1 oxygen --> 1 4-maleyl-acetoacetate + 1 H+
	5.2.1.2	tyrosine-degradation-I_5.2.1.2_MALEYLACETOACETATE-ISOMERASE-RXN	1 4-maleyl-acetoacetate --> 1 4-fumaryl-acetoacetate
	3.7.1.2	tyrosine-degradation-I_3.7.1.2_FUMARYLACETOACETASE-RXN	1 4-fumaryl-acetoacetate + 1 H2O --> 1 fumarate + 1 H+ + 1 acetoacetate
# 4-aminobutanoate degradation
	2.6.1.19	~multiple-pathways_2.6.1.19_GABATRANSAM-RXN	1 2-oxoglutarate + 1 4-aminobutanoate <=> 1 succinate_semialdehyde + 1 L-glutamate
	1.2.1.16/1.2.1.79	4-aminobutyrate-degradation-III_1.2.1.16_RXN0-5293_NAD	1 H2O + 1 succinate_semialdehyde + 1 NAD+ --> 1 succinate + 1 NADH + 2 H+
	1.2.1.16/1.2.1.79	4-aminobutyrate-degradation-III_1.2.1.16_RXN0-5293_NADP	1 succinate_semialdehyde + 1 H2O + 1 NADP+ --> 1 NADPH + 1 succinate + 2 H+
# allantoin degradation
	3.5.2.5	allantoin-degradation-to-ureidoglycolate_3.5.2.5_ALLANTOINASE-RXN	1 H2O + 1 (S)-(+)-allantoin --> 1 H+ + 1 allantoate
	3.5.3.9	allantoin-degradation-to-ureidoglycolate-II-(ammonia-producing)_3.5.3.9_ALLANTOATE-DEIMINASE-RXN	1 H2O + 2 H+ + 1 allantoate --> 1 ammonium + 1 S-ureidoglycine + 1 CO2
	3.5.3.26	allantoin-degradation-to-glyoxylate_allantoin-degradation-to-ureidoglycolate_3.5.3.26_URUR-RXN	1 S-ureidoglycine + 1 H2O --> 1 S-ureidoglycolate + 1 ammonium
	3.5.1.116	~no-pathway_3.5.1.116_BR29521	1 S-ureidoglycolate + 1 H2O --> 1 glyoxylate + 1 CO2 + 2 ammonia
	4.3.2.3	allantoin-degradation-to-glyoxylate_4.3.2.3_UREIDOGLYCOLATE-LYASE-RXN	1 S-ureidoglycolate --> 1 urea + 1 glyoxylate
# myo-inositol degradation
	1.1.1.18	~multiple-pathways_1.1.1.18_MYO-INOSITOL-2-DEHYDROGENASE-RXN	1 myo-inositol + 1 NAD+ <=> 1 NADH + 1 scyllo-inosose + 1 H+
	4.2.1.44	myo-inositol-degradation-I_4.2.1.44_MYO-INOSOSE-2-DEHYDRATASE-RXN	1 scyllo-inosose --> 1 3D-(3,5_4)-trihydroxycyclohexane-1,2-dione + 1 H2O
	3.7.1.22	myo-inositol-degradation-I_3.7.1.22_RXN-14149	1 H2O + 1 3D-(3,5_4)-trihydroxycyclohexane-1,2-dione --> 1 H+ + 1 5-deoxy-D-glucuronate
	5.3.1.30	myo-inositol-degradation-I_5.3.1.30_RXN-14150	1 5-deoxy-D-glucuronate <=> 1 2-deoxy-5-dehydro-D-gluconate
	2.7.1.92	myo-inositol-degradation-I_2.7.1.92_5-DEHYDRO-2-DEOXYGLUCONOKINASE-RXN	1 ATP + 1 2-deoxy-5-dehydro-D-gluconate --> 1 H+ + 1 5-dehydro-2-deoxy-D-gluconate_6-phosphate + 1 ADP
	4.1.2.29	myo-inositol-degradation-I_4.1.2.29_4.1.2.29-RXN	1 5-dehydro-2-deoxy-D-gluconate_6-phosphate --> 1 dihydroxyacetone_phosphate + 1 malonate_semialdehyde
	1.2.1.18	myo-inositol-degradation_beta-alanine-degradation_1.2.1.18_RXN-2902	1 coenzyme_A + 1 NAD+ + 1 malonate_semialdehyde --> 1 CO2 + 1 NADH + 1 acetyl-CoA
	1.2.1.18	~no-pathway_1.2.1.18_1.2.1.18-RXN	1 coenzyme_A + 1 malonate_semialdehyde + 1 NADP+ --> 1 NADPH + 1 CO2 + 1 acetyl-CoA
# butanoate degradation
	6.2.1.2	methyl-ketone-biosynthesis_6.2.1.2_BS143	1 n-butanoate + 1 coenzyme_A + 1 ATP --> 1 AMP + 1 diphosphate + 1 butanoyl-CoA
	1.3.8.1	~no-pathway_1.3.8.1_RXN-14193	1 butanoyl-CoA + 1 H+ + 1 FAD <=> 1 FADH2 + 1 crotonyl-CoA
# carbohydrate degradation
	# N-acetyl-glucosamine degradation
	2.7.1.59	chitin-derivatives-degradation_N-acetylglucosamine-degradation_2.7.1.59_N-ACETYLGLUCOSAMINE-KINASE-RXN	1 ATP + 1 N-acetyl-beta-D-glucosamine --> 1 ADP + 1 N-acetyl-D-glucosamine_6-phosphate + 1 H+
	3.5.1.25	chitin-derivatives-degradation_N-acetylglucosamine-degradation_3.5.1.25_NAG6PDEACET-RXN	1 N-acetyl-D-glucosamine_6-phosphate + 1 H2O --> 1 alpha-D-glucosamine_6-phosphate + 1 acetate
	# xylose degradation
	5.3.1.5	xylose-degradation-I_5.3.1.5_XYLISOM-RXN	1 D-xylose <=> 1 D-xylulose
	2.7.1.17	~metabolism-of-degradation_2.7.1.17_XYLULOKIN-RXN	1 ATP + 1 D-xylulose --> 1 ADP + 1 H+ + 1 D-xylulose-5-phosphate
	# sucrose degradation
	3.2.1.20	~no-pathway_3.2.1.20_RXN-2141	1 sucrose + 1 H2O --> 1 alpha-D-glucose + 1 beta-D-fructofuranose
	2.7.1.4	~multiple-pathways_2.7.1.4_FRUCTOKINASE-RXN	1 ATP + 1 beta-D-fructofuranose --> 1 ADP + 1 D-fructose-6-phosphate + 1 H+
	# mannitol degradation
	1.1.1.67	mannitol-degra_1.1.1.67_MANNDEHYDR-RXN	1 mannitol + 1 NAD+ --> 1 beta-D-fructofuranose + 1 NADH + 1 H+
# uracil degradation
	1.3.1.2	uracil-degradation-I-(reductive)_1.3.1.2_1.3.1.2-RXN	1 NADP+ + 1 5,6-dihydrouracil <=> 1 H+ + 1 uracil + 1 NADPH
	3.5.2.2	uracil-degradation-I-(reductive)_3.5.2.2_DIHYDROPYRIMIDINASE-RXN	1 H2O + 1 5,6-dihydrouracil <=> 1 H+ + 1 3-ureidopropionate
	3.5.1.6	uracil-degradation-I-(reductive)_3.5.1.6_BETA-UREIDOPROPIONASE-RXN	2 H+ + 1 H2O + 1 3-ureidopropionate --> 1 CO2 + 1 ammonium + 1 beta-alanine
# additional reactions
	3.6.1.25	~no-pathway_3.6.1.25_TRIPHOSPHATASE-RXN	1 PPPi + 1 H2O --> 1 diphosphate + 1 phosphate
	4.2.1.1	~no-pathway_4.2.1.1_CARBODEHYDRAT-RXN	1 bicarbonate <=> 1 CO2 + 1 H2O
	1.5.1.38	5,6-dimethylbenzimidazole-biosynthesis_1.5.1.38_FMNREDUCT-RXN_NADP	1 FMNH2 + 1 NADP+ <-- 1 FMN + 1 NADPH + 2 H+
	1.5.5.1	~no-pathway_1.5.5.1_1.5.5.1-RXN	1 FADH2 + 1 ubiquinone-10 <=> 1 ubiquinol-10 + 1 FAD
	1.1.5.3	glycerol-degradation_glycerophosphodiester-degradation_1.1.5.3_RXN0-5258	1 sn-glycerol_3-phosphate + 1 ubiquinone-10 <=> 1 ubiquinol-10 + 1 dihydroxyacetone_phosphate
	1.2.1.2	~multiple-pathways_1.2.1.2_1.2.1.2-RXN	1 formate + 1 NAD+ --> 1 NADH + 1 CO2
# spontaneous reactions
		spontaneous_metabolism-of-degradation_5.1.3.3_ALDOSE-1-EPIMERASE-RXN	1 alpha-D-glucose <=> 1 beta-D-glucose
		spontaneous_multiple-pathways_5.1.3.15_5.3.1.9_GLUCOSE-6-PHOSPHATE-1-EPIMERASE-RXN	1 alpha-D-glucose_6-phosphate <=> 1 beta-D-glucose-6-phosphate
		spontaneous_no-pathway_RXN-11811	1 ammonia + 1 H+ <=> 1 ammonium
		spontaneous_sulfate-reduction-IV-(dissimilatory)_RXN-8315	1 sulfite + 1 H+ <=> 1 bisulfite
# transport reactions
		T_ex_C_beta-D-glucose	1 beta-D-glucose_ex <=>
		T_trans_C_beta-D-glucose	1 beta-D-glucose + ADP + phosphate + H+ <-- 1 beta-D-glucose_ex + 1 ATP + H2O

## Sheet: enzymedetector
UniProt accession	Locus tag	length	EC number	KEGG	NCBI RefSeq	UniProt (TrEMBL or SwissProt)	PATRIC	BRENDA	BLAST e value	BLAST Hit acc	BrEPS pattern ID	Pubmed Reference	confidence
I7EZM7	PGA1_c17250,gapB	333	1.2.1.59		WP_014880123	T			7.9e-109	O34425			2.28
I7EZM7	PGA1_c17250,gapB	333	1.2.1.12	K00134					1.47e-147	P29272			1.81
I7EQ20	PGA1_c26890	115	1.-.-.-						1.11e-08	A8IAD2			0.64
I7EQ20	PGA1_c26890	115	3.5.99.10						4.15e-11	Q8U308			0.64
I7EZB2	PGA1_c15670	403	3.4.-.-						5.65e-10	P0AD70			0.64
I7EZB2	PGA1_c15670	403	2.3.1.-						3.15e-27	P0CU81			0.73
I7EZB2	PGA1_c15670	403	3.4.16.4						7.98e-12	Q8XBJ0			0.64
I7EZB2	PGA1_c15670	403	3.1.1.-						3.67e-38	Q9KX40			0.73
I7EZB2	PGA1_c15670	403	2.3.1.238						7.98e-26	Q9Y7D1			0.73
I7DLX8	PGA1_c04120,fadA1	391	2.3.1.16		WP_014879089	T			1.06e-112	O32177			2.28
I7DLX8	PGA1_c04120,fadA1	391	2.3.1.9	K00626					1.15e-88	Q8VCH0			1.72
I7DLX8	PGA1_c04120,fadA1	391	2.3.1.155						1.15e-88	Q8VCH0			0.85
I7DMK4	PGA1_c05960,tilS	386	6.3.4.19	K04075		T			2.87e-142	Q5LNU7			2.57
I7EJJ2	PGA1_c05930,tolB	437	3.4.14.-						7.27e-11	B2RIT0			0.64
I7EJJ2	PGA1_c05930,tolB	437	3.4.21.-						1.05e-12	P39839			0.64
I7EJJ2	PGA1_c05930,tolB	437	4.2.2.6						0.00053	Q59418			0.64
I7EJJ2	PGA1_c05930,tolB	437	3.4.19.1						7.98e-05	Q8R146			0.64
I7EUF9	PGA1_c06020	136	3.1.2.-						2.84e-05	P76084			0.64
I7DSG3	PGA1_c23220,hipA	430	2.7.11.1	K07154					1.41e-104	P23874			1.72
I7F3S8	PGA1_c34490,kdsB	266	2.7.7.38	K00979	WP_014881488	T			1.14e-69	Q0AST1			3.08
I7F3S8	PGA1_c34490,kdsB	266	2.7.7.90						2.69e-48	Q083F6			0.73
I7EJ36	PGA1_c04290,phnL	227	2.7.8.37	K05780					6.39e-89	P16679			1.72
I7EJ36	PGA1_c04290,phnL	227	3.6.3.-						1.28e-32	O34979			0.73
I7F385	PGA1_c31980	253	1.1.1.100	K00059					1.46e-50	Q9X248			1.6
I7F385	PGA1_c31980	253	1.2.1.62						6.34e-79	P94681	bp005603		1.73
I7F385	PGA1_c31980	253	1.1.1.401						6.57e-44	Q1NEI6			0.73
I7F385	PGA1_c31980	253	1.1.1.268						1.35e-44	Q56840			0.73
I7EVV9	PGA1_c01920,degQ	465	3.4.21.-		WP_014878923	T							1.43
I7EVV9	PGA1_c01920,degQ	465	3.4.21.107						1.88e-74	E1V4H2			0.78
I7EXD2	PGA1_c08020,dacC	396	3.4.16.4	K07258	WP_014879402	T			1.4e-57	P08506			3.08
I7EXD2	PGA1_c08020,dacC	396	3.5.2.6						3.34e-51	P0AEB2			0.78
I7DQ64	PGA1_c15100,trmJ	248	2.1.1.200			T			2.66e-34	A0A0H2ZF87			1.49
I7DQ64	PGA1_c15100,trmJ	248	2.1.1.-	K02533	WP_014874623								1.54
I7DY46	PGA1_c06290,ctaE	271	1.9.3.1	K02276	WP_014873726	T			1.05e-107	P06030			3.15
I7DZ27	PGA1_c10010,soxH	317	3.5.2.6						8.07e-05	P26918			0.64
I7DYU5	PGA1_c09160	206	3.1.1.85	K09789									0.87
I7DYU5	PGA1_c09160	206	2.1.1.197						5.25e-25	Q64VX6			0.73
I7DY02	PGA1_c05790,priA	731	3.6.4.-	K04066		T			0	P05445			2.57
I7DY02	PGA1_c05790,priA	731	3.6.1.-		WP_014879226								0.67
I7E5K7	PGA1_c34830	612	3.6.3.-						2.09e-87	P71082			0.85
I7EJH1	PGA1_c05630,queF	154	1.7.1.13	K09457	WP_014879211	T			7.92e-104	Q1GEZ0			3.15
I7ESL7	PGA1_262p00510	337	6.5.1.1						1.37e-18	B1ZZL9			0.64
I7ESL7	PGA1_262p00510	337	3.1.27.-						6.38e-09	Q9VE51			0.64
I7DL14	PGA1_c00430,fah	418	3.7.1.2	K01555	WP_014878843	T			1.22e-135	Q1ZXQ1			3.24
I7DL14	PGA1_c00430,fah	418	4.3.2.3						0.000215	A9ALD1			0.64
I7DUG2	PGA1_c30700	425	3.1.21.3	K01154									0.87
I7EUI6	PGA1_c06370,apt	179	2.4.2.7	K00759	WP_014879272	T			3.57e-115	Q5LNY7			3.15
I7EUV9	PGA1_c07840,bglA	444	3.2.1.21	K05350	WP_014879386	T			4.15e-127	P26208			3.24
I7EUV9	PGA1_c07840,bglA	444	3.2.1.74						1.76e-124	B9K7M5			0.94
I7EUV9	PGA1_c07840,bglA	444	3.2.1.38						2.02e-101	P94248			0.85
I7EW52	PGA1_c12950,acs,acsA	695	6.2.1.1	K01895		T			0	O68040			2.57
I7EWL5	PGA1_c14860,hflX	423	3.6.5.-						4.26e-13	A9KMF5			0.64
I7DPF6	PGA1_c12290	286	3.1.1.73						5.22e-10	A1CC33			0.64
I7DPF6	PGA1_c12290	286	3.2.1.8						9.62e-06	B8YG19			0.64
I7DPF6	PGA1_c12290	286	3.1.1.72						9.62e-06	B8YG19			0.64
I7E047	PGA1_c13950,cysK	344	2.5.1.47	K01738	WP_014879878	T			1.56e-109	Q7RYW6			3.15
I7E047	PGA1_c13950,cysK	344	4.2.1.22						1.96e-62	P32232			0.78
I7DYH4	PGA1_c07810	457	2.6.1.-		WP_014879384	T							1.43
I7DYH4	PGA1_c07810	457	2.6.1.76	K15785					0	E1V7V7			1.81
I7DYH4	PGA1_c07810	457	2.6.1.96						1.89e-116	Q84P52			0.85
I7E2S6	PGA1_c23740,rpiA	262	5.3.1.6	K01807	WP_014880659	T			9.15e-168	Q1GF74			3.24
I7E5X8	PGA1_c36120	221	2.5.1.18	K00799					2.46e-14	Q93112			1.51
I7E5X8	PGA1_c36120	221	5.2.1.2						9.46e-14	O43708			0.64
I7E5X8	PGA1_c36120	221	4.5.1.1						2.46e-14	Q93112			0.64
I7EXQ2	PGA1_c09330,hisB	195	4.2.1.19	K01693	WP_014879506	T			1.06e-133	Q1GF01			3.24
I7DPW8	PGA1_c14030	208	2.3.1.157						6.1e-08	Q136Z3			0.64
I7DPW8	PGA1_c14030	208	2.7.7.23						6.1e-08	Q136Z3			0.64
I7DPW8	PGA1_c14030	208	2.7.7.77						1.22e-13	Q3MFS2			0.64
I7DYU0	PGA1_c09110,thiC	599	4.1.99.17	K03147		T			0	Q1GEY0			2.57
I7EWR4	PGA1_c05380	487	2.4.-.-						0.004	Q6FFS6			0.64
I7EXN8	PGA1_c09170,bioC	262	2.1.1.197	K02169					5.81e-54	Q3B172			1.65
I7F1R9	PGA1_c35620,fliN	98	3.-.-.-						5.7e-05	P24073			0.64
I7EKQ5	PGA1_c10640	437	3.1.-.-						0.003	P38078			0.64
I7EKQ5	PGA1_c10640	437	7.1.2.2						0.003	P38078			0.64
I7ERC4	PGA1_c32210,hpaD	327	1.13.11.15		WP_014881314	T							1.43
I7ERC4	PGA1_c32210,hpaD	327	1.13.11.2	K00446					1.29e-34	P31003			1.6
I7ERC4	PGA1_c32210,hpaD	327	1.13.11.39						2.8e-33	Q8GR45			0.73
I7EXG1	PGA1_c08330	303	3.1.4.54						0.002	Q02883			0.64
I7ELV7	PGA1_c15120	489	3.4.17.19	K01299		T			7.81e-108	P42663			2.48
I7DZ51	PGA1_c10260	402	2.6.1.90						6.65e-23	Q6T1W6			0.73
I7DZ51	PGA1_c10260	402	2.6.1.101						9.42e-28	Q70KD4			0.73
I7DZ51	PGA1_c10260	402	2.6.1.102						2.16e-24	Q7DBF3			0.73
I7DZ51	PGA1_c10260	402	2.6.1.109						3.09e-31	Q8EEB1			0.73
I7DZ51	PGA1_c10260	402	2.6.1.100						1.75e-24	Q8G8Y2			0.73
I7DZ51	PGA1_c10260	402	2.6.1.106						2.59e-26	Q9ZGH4			0.73
I7EL35	PGA1_c12210	719	2.7.9.3	K01008					4.46e-42	B2TKP6			1.6
I7EZ29	PGA1_c14740	160	3.5.1.42	K03743					1.67e-36	P0A6G3			1.6
I7F3P8	PGA1_c34140	308	3.5.1.-						4.09e-67	O30107			0.78
I7F3P8	PGA1_c34140	308	3.5.1.98						2.15e-65	Q941D6			0.78
I7F3P8	PGA1_c34140	308	3.5.1.62						2.12e-48	Q969S8			0.73
I7F3P8	PGA1_c34140	308	3.5.1.48						2.12e-48	Q969S8			0.73
I7EXY3	PGA1_c10170	387	3.5.1.32						3.41e-99	P45493			0.85
I7EXY3	PGA1_c10170	387	3.4.17.-						1.35e-80	P58156			0.78
I7DPU9	PGA1_c13820	257	2.7.8.-	K06133									0.87
I7DPU9	PGA1_c13820	257	2.7.8.7						2.99e-23	P39135			0.73
I7EWG6	PGA1_c14240,cdsA	263	2.7.7.41	K00981	WP_014879900	T			5.46e-28	Q8YHH2			3.03
I7F4B7	PGA1_c36390	351	2.7.13.3						2.31e-07	P40330			0.64
I7F4B7	PGA1_c36390	351	4.2.2.n1						4.96e-07	Q5QWY4			0.64
I7EN64	PGA1_c20140,bpt	273	2.3.2.29	K21420		T			2.22e-172	Q1GIA1			2.57
I7DRI7	PGA1_c19960	230	3.4.24.-	K07387					8.41e-17	P25894			1.51
I7DSW4	PGA1_c24820	293	5.3.3.17						3.29e-17	O69754			0.64
I7DSW4	PGA1_c24820	293	5.1.-.-						5.74e-26	P40788			0.73
I7EX64	PGA1_c07220	279	4.1.2.13	K01624					2.54e-47	P94453			1.6
I7EX64	PGA1_c07220	279	4.1.2.29						3.12e-42	Q5WKY5			0.73
I7F2L7	PGA1_262p02260	759	2.7.13.3						1.07e-97	Q54YZ9			0.85
I7DWX8	PGA1_c02010,bztD	263	7.4.2.1	K09972					6.36e-100	P0AAG3			1.72
I7DWX8	PGA1_c02010,bztD	263	3.6.3.-						5.38e-106	O34677			0.85
I7DXJ6	PGA1_c04450,gsiA1	592	3.6.3.-		WP_014879115	T							1.43
I7DXJ6	PGA1_c04450,gsiA1	592	7.4.2.10						3.08e-151	Q32IB5			0.94
I7DXL6	PGA1_c04650,fabB	409	2.3.1.41	K00647	WP_014879134	T			0	P43710			3.24
I7DXL6	PGA1_c04650,fabB	409	2.3.1.179						2.04e-92	Q9KQH9			0.85
I7DXP1	PGA1_c04900,pth	252	3.1.1.29	K01056	WP_014879152	T			2.02e-124	Q1GK69			3.24
I7EIZ4	PGA1_c03840,mutB	655	5.4.99.2		WP_014879066	T			2.16e-133	Q3J4D7			2.37
I7EIZ4	PGA1_c03840,mutB	655	5.4.99.63	K14447					0	Q3IZ90			1.81
I7F261	PGA1_262p00250	157	1.16.-.-						2.48e-15	Q8RPQ2			0.64
I7DWD2	PGA1_262p00740	375	3.5.1.127						2.95e-61	O04373			0.78
I7DWD2	PGA1_262p00740	375	3.5.1.32						4.52e-75	P45493			0.78
I7DWD2	PGA1_262p00740	375	3.4.17.-						4.74e-63	P80092			0.78
I7E0S6	PGA1_c15820	173	2.3.1.89						1.59e-14	A5I6N5			0.64
I7E0S6	PGA1_c15820	173	4.2.1.-						3.66e-36	Q9C6B3			0.73
I7EM38	PGA1_c15750,pstB	265	7.3.2.1	K02036	WP_014880007	T			0	Q1GH74			3.24
I7DPQ2	PGA1_c13310	137	2.5.1.72						0.000426	Q9FGS4			0.64
I7DVH9	PGA1_c34400	464	2.6.1.-		WP_014881481	T							1.43
I7DVH9	PGA1_c34400	464	2.6.1.113	K12256					0	Q9I6J2			1.81
I7DVH9	PGA1_c34400	464	2.6.1.76						4.16e-118	E1V7V7			0.85
I7DVH9	PGA1_c34400	464	2.6.1.96						5.63e-117	Q84P52			0.85
I7DV62	PGA1_c33260	408	1.14.13.-	K03185					3.28e-106	Q2RMZ4			1.72
I7DV62	PGA1_c33260	408	1.14.99.60						2.93e-60	P75728			0.78
I7DV62	PGA1_c33260	408	1.14.13.240						3.28e-106	Q2RMZ4			0.85
I7E1H3	PGA1_c18990,engA,der	486	3.6.-.-						1.01e-20	B1L9N6			0.64
I7E1H3	PGA1_c18990,engA,der	486	3.6.5.-						9.99e-21	Q9WYA4			0.73
I7E4X6	PGA1_c31970	139	3.1.1.29						2.02e-31	P45388			0.73
I7EXE2	PGA1_c08130,cobJ	254	2.1.1.131	K05934	WP_014879410	T			1.68e-70	P21640	bp012841		4.03
I7EXE2	PGA1_c08130,cobJ	254	4.99.1.4						5.53e-09	B3GZA0			0.64
I7EXE2	PGA1_c08130,cobJ	254	1.3.1.76						5.53e-09	B3GZA0			0.64
I7EXE2	PGA1_c08130,cobJ	254	2.1.1.107						5.53e-09	B3GZA0			0.64
I7EXE2	PGA1_c08130,cobJ	254	5.4.99.60						9.6e-42	O29534			0.73
I7EXE2	PGA1_c08130,cobJ	254	2.1.1.272						2.07e-43	O87689			0.73
I7EXE2	PGA1_c08130,cobJ	254	2.1.1.130						2.11e-45	P9WGB3			0.73
I7ESS8	PGA1_262p01220,norB	452	1.7.2.5	K04561	WP_014881752	T			1.05e-157	P98008			3.24
I7ESS8	PGA1_262p01220,norB	452	1.9.3.1						4.42e-05	Q05572			0.64
I7ERN6	PGA1_c33850	366	3.4.21.53						6.39e-15	B5EDX8			0.64
I7EKA7	PGA1_c09150,bioA	432	2.6.1.62	K00833	WP_014879492	T			2.71e-172	Q5LEY1			3.24
I7EKA7	PGA1_c09150,bioA	432	2.8.1.6						2.71e-172	Q5LEY1			0.94
I7F0X1	PGA1_c32250,puuC	494	1.2.1.-		WP_014881318	T			7.14e-116	O14293			2.28
I7F0X1	PGA1_c32250,puuC	494	1.2.1.99	K09472					7.14e-116	O14293			1.72
I7F0X1	PGA1_c32250,puuC	494	1.2.1.5						2.69e-154	P23883			0.94
I7F0X1	PGA1_c32250,puuC	494	1.2.1.36						8.06e-114	P27463			0.85
I7F0X1	PGA1_c32250,puuC	494	1.2.1.3						9.72e-126	P42041			0.94
I7E084	PGA1_c14260	449	3.4.24.-	K11749		T			3.72e-62	Q92Q49			2.41
I7E0H7	PGA1_c15180	170	3.1.2.-	K07107									0.87
I7EZD7	PGA1_c16100	472	2.7.8.-	K06131					4.54e-113	Q87TY7			1.72
I7EV55	PGA1_c09020	644	2.7.13.3						1.68e-08	Q1M799			0.64
I7EMU5	PGA1_c18980	337	1.14.19.23	K10255					3.09e-08	P46312			1.51
I7EMU5	PGA1_c18980	337	1.14.19.45	K10255					4.62e-43	O34653			1.6
I7EMU5	PGA1_c18980	337	1.14.19.6						6.01e-09	Q54794			0.64
I7EMU5	PGA1_c18980	337	1.14.19.35						8.48e-09	Q56VS4			0.64
I7E6Q0	PGA1_78p00130	374	1.1.1.179						6.58e-16	D4GP29			0.64
I7E6Q0	PGA1_78p00130	374	1.1.1.371						2.23e-12	O05265			0.64
I7E6Q0	PGA1_78p00130	374	1.1.1.361						2.19e-12	O07564			0.64
I7E6Q0	PGA1_78p00130	374	1.1.99.28						1.44e-19	Q07982			0.64
I7E6Q0	PGA1_78p00130	374	1.3.1.20						3.75e-14	Q148L6			0.64
I7E6Q0	PGA1_78p00130	374	1.1.1.292						5.93e-13	Q2I8V6			0.64
I7EMR5	PGA1_c18720,glnA	468	6.3.1.2	K01915	WP_014874895	T			0	P43518			3.24
I7F1J0	PGA1_c34810	415	2.1.1.190	K03215					6.87e-44	B8CJP2			1.6
I7F1W4	PGA1_c36100,gltB	1510	1.4.1.13	K00265	WP_014881599	T			0	Q05755	bp008116		4.19
I7F1W4	PGA1_c36100,gltB	1510	1.4.7.1						0	P55037	bp008116		1.89
I7EQ10	PGA1_c26750,glnD	933	2.7.7.59	K00990	WP_014880886	T			0	Q5LWE5			3.24
I7EQ10	PGA1_c26750,glnD	933	3.1.4.-			T			0	Q5LWE5			1.7
I7DN66	PGA1_c08240,glpD	529	1.1.5.3	K00111	WP_014879421	T			8.01e-145	P13035			3.24
I7DN66	PGA1_c08240,glpD	529	1.1.1.402						6.84e-167	Q2YIQ2			0.94
I7DTK2	PGA1_c27490,gap	335	1.2.1.-			T							0.76
I7DTK2	PGA1_c27490,gap	335	1.2.1.12	K00134	WP_014880943				1.16e-157	P29272	bp006508		3.43
I7DWX4	PGA1_c01960	222	3.1.3.18	K01091					1.51e-14	Q3J8A0			1.51
I7DWX4	PGA1_c01960	222	3.6.1.1						2.73e-17	A9VQ75			0.64
I7DWX4	PGA1_c01960	222	3.1.3.105						9.11e-15	Q9HZ62			0.64
I7F534	PGA1_65p00180	203	2.7.8.6				fig|391619.35.peg.20						0.82
I7F534	PGA1_65p00180	203	2.7.8.40						9.02e-21	O32274			0.73
I7F534	PGA1_65p00180	203	2.7.8.31						1.79e-20	P71241			0.64
I7F534	PGA1_65p00180	203	2.7.8.36						6.31e-19	Q0P9D0			0.64
I7ET54	PGA1_78p00270,lipA	322	2.8.1.8	K03644	WP_014876557	T			1.31e-162	Q1GGW2			3.24
I7EW48	PGA1_c03020,pyrC1	436	3.5.2.3	K01465	WP_014879003	T			5.99e-95	C0R5K8			3.15
I7EX54	PGA1_c16910,trpC	270	4.1.1.48	K01609	WP_014880095	T			9.22e-128	Q9ZFA7			3.24
I7EYB9	PGA1_c11820	252	2.3.1.-						6.83e-29	P53219			0.73
I7EYB9	PGA1_c11820	252	3.1.-.-						6.52e-37	P75736			0.73
I7F093	PGA1_c29710,glcE	366	1.1.99.39						1.17e-11	O23240			0.64
I7F093	PGA1_c29710,glcE	366	1.1.99.6						1.92e-10	O29853			0.64
I7F093	PGA1_c29710,glcE	366	1.1.2.4						5.6e-12	P46681			0.64
I7F093	PGA1_c29710,glcE	366	1.1.99.40						5.6e-12	P46681			0.64
I7EK10	PGA1_c08110,cobL	394	2.1.1.132	K00595	WP_014879408	T			2.28e-92	Q9HZU0			3.15
I7EK10	PGA1_c08110,cobL	394	2.1.1.289						9.38e-39	O87694			0.73
I7EK10	PGA1_c08110,cobL	394	2.1.1.196						9.38e-39	O87694			0.73
I7F3V0	PGA1_c34790	172	2.-.-.-						1.71e-10	P0AA99			0.64
I7ERX7	PGA1_c34770	213	2.-.-.-						1.06e-61	P05448			0.78
I7EX97	PGA1_c07610,hpd	366	1.13.11.27	K00457	WP_014879366	T			2.56e-119	Q9I576			3.15
I7DZB6	PGA1_c10560,birA	249	6.3.4.15	K03524	WP_014879602	T			6.65e-87	P29906			3.15
I7DZB6	PGA1_c10560,birA	249	2.7.1.33						7.34e-16	Q9JWI7			0.64
I7E0N2	PGA1_c15440	552	2.4.1.255						2.5e-81	Q9M8Y0			0.85
I7DPN3	PGA1_c13100	296	1.1.1.353						2.74e-20	B9WYE6			0.64
I7DPN3	PGA1_c13100	296	1.1.1.317						2.86e-20	Q3L181			0.64
I7DW67	PGA1_c36500	258	4.2.1.17	K01715					4.66e-110	P9WNN9	bp010144		2.67
I7E0Y9	PGA1_c16600,mdeA	401	4.4.1.11	K01761	WP_014880072	T			0	P13254			3.24
I7E0Y9	PGA1_c16600,mdeA	401	4.4.1.13						1.22e-100	A2RM21			0.85
I7E0Y9	PGA1_c16600,mdeA	401	4.4.1.2						0	P13254			0.94
I7E0Y9	PGA1_c16600,mdeA	401	2.5.1.-						2.52e-101	P55218			0.85
I7E0Y9	PGA1_c16600,mdeA	401	4.4.1.28						1.68e-158	Q8RDT4			0.94
I7E5J3	PGA1_c34680,ubiG	248	2.1.1.222	K00568		T			1.76e-169	Q1GCH8			2.57
I7E5J3	PGA1_c34680,ubiG	248	2.1.1.64	K00568	WP_014881501	T			1.76e-169	Q1GCH8			3.24
I7DMG5	PGA1_c05490,allA	161	4.3.2.3	K01483		T			3.98e-57	O68109			2.41
I7DMG5	PGA1_c05490,allA	161	3.5.1.116		WP_014879200								0.67
I7EWH8	PGA1_c04410	458	2.-.-.-						2.47e-26	A0A2I6PIZ1			0.73
I7EWH8	PGA1_c04410	458	2.8.3.22						7.01e-20	A9WC40			0.64
I7EWH8	PGA1_c04410	458	2.8.3.19						3.35e-22	P76518			0.73
I7EWH8	PGA1_c04410	458	2.8.3.13						7.38e-20	Q7TNE1			0.64
I7DNJ8	PGA1_c09470	356	1.3.7.7						0.000792	B7KVV7			0.64
I7DNJ8	PGA1_c09470	356	1.3.7.15						0.000614	P26177			0.64
I7DNJ8	PGA1_c09470	356	2.7.10.2						0.001	P96716			0.64
I7DXT7	PGA1_c05220,ugpC3	372	7.6.2.11						5.72e-58	O85818			0.78
I7DXT7	PGA1_c05220,ugpC3	372	3.6.3.-						2.24e-57	P94360			0.78
I7DXT7	PGA1_c05220,ugpC3	372	7.6.2.10						2.91e-60	Q6CZ34			0.78
I7DZR4	PGA1_c12420,soxX	158	2.8.5.2	K17223									0.87
I7ERU2	PGA1_c34420,potF	361	2.3.1.-						5.57e-07	P76108			0.64
I7ETB0	PGA1_65p00210	284	2.3.1.28						7.18e-21	P26838			0.73
I7EY50	PGA1_c10900,pyrE	226	2.4.2.10	K00762		T			7.3e-155	Q1GFQ6			2.57
I7DKY7	PGA1_c00070,gyrB	805	5.6.2.2	K02470	WP_014873165	T			0	B8GXQ0			3.24
I7DMN1	PGA1_c06310,thrC	462	4.2.3.1	K01733	WP_014879266	T			1.84e-180	P29363			3.24
I7DM85	PGA1_c05140,dadD	416	1.4.99.6		WP_014879169	T			1.14e-41	A9BU40			2.16
I7DM85	PGA1_c05140,dadD	416	1.4.5.1	K00285									0.87
I7DM17	PGA1_c04470	209	2.5.1.18						1.16e-29	Q12390			0.73
I7DM17	PGA1_c04470	209	5.2.1.-						6.8e-11	Q9ZVQ3			0.64
I7DX67	PGA1_c03110	169	3.6.1.68						2.42e-06	M4I1C6			0.64
I7DX67	PGA1_c03110	169	3.6.1.55						5.53e-07	P96590			0.64
I7DX67	PGA1_c03110	169	3.6.1.13						3.67e-12	Q58549			0.64
I7DX67	PGA1_c03110	169	3.6.1.22						1.02e-06	Q9CA40			0.64
I7DX67	PGA1_c03110	169	3.6.1.67						1.02e-06	Q9CA40			0.64
I7E576	PGA1_c33500	398	2.4.99.12	K02527		T			2.68e-20	P0AC75			2.27
I7E576	PGA1_c33500	398	2.4.99.13	K02527					2.68e-20	P0AC75			1.51
I7E576	PGA1_c33500	398	2.4.99.14	K02527									0.87
I7E576	PGA1_c33500	398	2.4.99.15	K02527									0.87
I7DSR7	PGA1_c24310	219	7.6.2.12	K09689					6.27e-52	P32016			1.65
I7DSR7	PGA1_c24310	219	7.5.2.4						3.79e-23	Q65E84			0.73
I7EZH8	PGA1_c16680	355	3.6.3.-	K10111									0.87
I7EZH8	PGA1_c16680	355	7.6.2.10						1.99e-125	Q1QTX6			0.94
I7EZH8	PGA1_c16680	355	7.5.2.1						2.66e-124	Q8Z1U0			0.94
I7DQL0	PGA1_c16370,arcA	310	3.5.3.1	K01476		T			6.43e-126	P0A2Y0			2.57
I7E5W3	PGA1_c35940	566	2.4.1.102						1e-06	Q1M0V6			0.64
I7E5W3	PGA1_c35940	566	2.4.1.150						1e-06	Q1M0V6			0.64
I7E5W3	PGA1_c35940	566	2.4.1.148						1e-06	Q1M0V6			0.64
I7EKU0	PGA1_c11030	279	3.4.24.-						1.45e-05	A9GAW6			0.64
I7EKU0	PGA1_c11030	279	3.4.21.53						1.87e-05	B7FSL4			0.64
I7EKU0	PGA1_c11030	279	3.6.4.-						0.005	Q9VQN8			0.64
I7EY67	PGA1_c11160	334	3.2.1.52	K01207		T			2.07e-48	Q2KXM7			2.36
I7EQM9	PGA1_c29720,glcD	482	1.1.3.15	K00104									0.87
I7EQM9	PGA1_c29720,glcD	482	1.1.99.-						4.81e-48	A1L258			0.73
I7EQM9	PGA1_c29720,glcD	482	1.1.99.39						1.46e-48	B8B7X6			0.73
I7EQM9	PGA1_c29720,glcD	482	1.1.99.6						2.82e-48	O29853			0.73
I7EQM9	PGA1_c29720,glcD	482	1.1.2.4						4.96e-58	Q12627			0.78
I7EWD1	PGA1_c03910	252	1.1.1.393						1.07e-28	A7AZH2			0.73
I7EWD1	PGA1_c03910	252	1.1.1.100						3.9e-29	Q89AG9			0.73
I7DZI3	PGA1_c11350,anmK	390	2.7.1.170	K09001		T			0	Q5LQK6			2.57
I7DZI3	PGA1_c11350,anmK	390	2.7.1.-		WP_014879664								0.67
I7EL18	PGA1_c11950,deoB	406	5.4.2.7	K01839	WP_014879711	T			1.97e-145	Q92T47			3.24
I7EYD3	PGA1_c22010,tadA	153	3.5.4.33	K11991		T			1.07e-57	A9CK16			2.41
I7EYD3	PGA1_c22010,tadA	153	3.5.4.-		WP_014880499								0.67
I7ENQ6	PGA1_c22020	441	5.4.99.-			T							0.76
I7ENQ6	PGA1_c22020	441	5.4.99.22	K06178					6.03e-38	Q9HZ55			1.6
I7ERK5	PGA1_c33490,suhB2	267	3.1.3.25	K01092	WP_014881412	T			8.44e-30	P0ADG4			3.03
I7F243	PGA1_262p00050	425	2.4.-.-	K16555									0.87
I7F243	PGA1_262p00050	425	2.4.1.305						4.86e-15	B5L3F2			0.64
I7F243	PGA1_262p00050	425	2.4.1.226						2.29e-10	Q8L0V4			0.64
I7F243	PGA1_262p00050	425	2.4.1.175						2.29e-10	Q8L0V4			0.64
I7DMM4	PGA1_c06210,scoA	239	2.8.3.5	K01028	WP_014879261	T			1.26e-104	B0RVK4	bp011605		4.1
I7EKG9	PGA1_c09840,gatB	504	6.3.5.-		WP_014879542	T			0	Q1GIT2			2.37
I7EKG9	PGA1_c09840,gatB	504	6.3.5.6	K02434					0	Q1GIT2			1.81
I7EKG9	PGA1_c09840,gatB	504	6.3.5.7	K02434					0	Q1GIT2			1.81
I7F1T8	PGA1_c25920,fepC	260	7.2.2.-	K02013									0.87
I7F1T8	PGA1_c25920,fepC	260	3.6.3.-						9.2e-93	O34510			0.85
I7F1T8	PGA1_c25920,fepC	260	7.2.2.16						8.62e-90	P49938			0.85
I7F1T8	PGA1_c25920,fepC	260	7.6.2.8						8.38e-43	Q9HQ18			0.73
I7EY16	PGA1_c10370,nuoA	121	7.1.1.-			T							0.76
I7EY16	PGA1_c10370,nuoA	121	7.1.1.2	K00330					5.09e-50	O21273			1.6
I7EY16	PGA1_c10370,nuoA	121	1.6.5.11		WP_014874151								0.67
I7F2D5	PGA1_262p01260,nirK	407	1.7.2.1	K00368	WP_014881756	T			7.59e-160	Q92Z29			3.24
I7DPQ6	PGA1_c13360	368	4.1.99.22						0.006	A0L7R4			0.64
I7DPQ6	PGA1_c13360	368	1.1.1.34						0.01	P29058			0.64
I7DYY4	PGA1_c09550,glsA	304	3.5.1.2	K01425	WP_014879519	T			2.18e-138	Q15U72			3.24
I7EQL7	PGA1_c29570	645	3.4.24.-						0.005	B1ZMG6			0.64
I7EQL7	PGA1_c29570	645	5.6.1.1						0.002	O61577			0.64
I7EQL7	PGA1_c29570	645	3.6.1.3						0.000223	Q503W7			0.64
I7EQL7	PGA1_c29570	645	3.6.4.-						0.001	Q6DDU8			0.64
I7ER95	PGA1_c31860,pbpC	675	2.4.2.-		WP_014881283	T							1.43
I7ER95	PGA1_c31860,pbpC	675	2.4.1.129	K05367					1.06e-126	P76577			1.81
I7ER95	PGA1_c31860,pbpC	675	3.4.16.4						7.21e-49	P38050			0.73
I7EVM5	PGA1_c00990,folK	189	2.7.6.3	K00950	WP_014878883	T			1.51e-27	P72736			3.03
I7F107	PGA1_c32790	329	4.1.2.4	K01619		T			3.9e-136	Q91YP3			2.57
I7EUR6	PGA1_c07340	290	3.1.1.99						2.42e-28	P0DOV6			0.73
I7EUR6	PGA1_c07340	290	3.1.1.15						3.24e-37	Q1JUP5			0.73
I7EUR6	PGA1_c07340	290	3.1.1.17						3.77e-18	Q2PFX5			0.64
I7F142	PGA1_c23360	381	1.1.1.1						7.98e-63	P0DJA2			0.78
I7F142	PGA1_c23360	381	1.1.1.244						1.46e-68	P31005			0.78
I7F142	PGA1_c23360	381	1.1.1.202						9.27e-62	Q59477			0.78
I7EJT3	PGA1_c07200	394	1.14.11.-						1.83e-06	A0A097ZPD9			0.64
I7EJT3	PGA1_c07200	394	1.14.11.18						0.001	O14832			0.64
I7DQK7	PGA1_c16310	251	3.6.3.-						8.34e-63	C0SP98			0.78
I7DQK7	PGA1_c16310	251	7.4.2.10						4.85e-58	Q0T6D3			0.78
I7EZI5	PGA1_c26640,coaBC	400	4.1.1.36	K13038	WP_014880875	T			2.15e-109	Q9KVD1			3.15
I7EZI5	PGA1_c26640,coaBC	400	6.3.2.5	K13038	WP_014880875	T			2.15e-109	Q9KVD1			3.15
I7EYC0	PGA1_c21860,hisN	250	3.1.3.11						9.32e-18	O67791			0.64
I7EYC0	PGA1_c21860,hisN	250	3.1.3.15						1.48e-53	Q6NPM8			0.78
I7EYC0	PGA1_c21860,hisN	250	3.1.3.25						1.48e-53	Q6NPM8			0.78
I7EYC0	PGA1_c21860,hisN	250	3.1.3.93						1.48e-53	Q6NPM8			0.78
I7EZ80	PGA1_c15400,sufD	426	3.1.-.-						5.72e-11	P67126			0.64
I7EIV7	PGA1_c03440,thiol	195	1.8.1.9						0.000362	P46843			0.64
I7EIV7	PGA1_c03440,thiol	195	1.8.1.8						1.39e-08	Q7Y0E8			0.64
I7EJD3	PGA1_c05210,ugpC2	371	7.6.2.10		WP_014873618	T			2.16e-72	Q89WG0			2.21
I7EJD3	PGA1_c05210,ugpC2	371	3.6.3.-						1.09e-74	O32151			0.78
I7DUV5	PGA1_c31990	345	3.4.11.-						6.17e-46	P53425			0.73
I7DUV5	PGA1_c31990	345	3.4.11.25						1.11e-06	Q52VH2			0.64
I7DQK1	PGA1_c16210	160	1.2.5.3	K03518					2.7e-49	P19915	bp008451		2.55
I7DQK1	PGA1_c16210	160	1.17.5.2						8.72e-38	D7REY5	bp008451		1.68
I7DQK1	PGA1_c16210	160	1.17.1.4						1.72e-38	O32143	bp008451		1.68
I7DQK1	PGA1_c16210	160	1.3.7.9						3.53e-38	O33818	bp008451		1.68
I7DQK1	PGA1_c16210	160	1.2.99.6						7.04e-38	P77165	bp008451		1.68
I7DQK1	PGA1_c16210	160	1.17.1.5						3.91e-44	Q0QLF3	bp008451		1.68
I7DQK1	PGA1_c16210	160	1.2.99.7						2.55e-39	Q46509	bp008451		1.68
I7DQK1	PGA1_c16210	160	1.2.99.8						6.45e-50	Q4J6M5	bp008451		1.68
I7DRF0	PGA1_c19560	239	2.6.1.114						6.41e-35	K4REZ6			0.73
I7DPB0	PGA1_c11770	210	3.1.3.16						3.88e-06	P53043			0.64
I7EKS7	PGA1_c10880,alr	345	5.1.1.1	K01775	WP_014879627	T			0	Q1GFQ4			3.24
I7F276	PGA1_262p00450	260	7.5.2.10	K10545									0.87
I7F276	PGA1_262p00450	260	7.5.2.7						3.76e-61	Q8RD43			0.78
I7DW81	PGA1_262p00140	386	4.6.1.1						0.005	Q25263			0.64
I7EPC2	PGA1_c24580	435	2.1.2.1	K00600					1.08e-76	A3DNJ6			1.65
I7DPL0	PGA1_c12840,amaB	416	3.5.1.87	K06016	WP_014879784	T			0	Q6DTN4			3.24
I7DPL0	PGA1_c12840,amaB	416	3.5.1.6	K06016					6.01e-58	A0QZE3			1.65
I7DPL0	PGA1_c12840,amaB	416	3.5.3.9						2.12e-45	P77425			0.73
I7DPL0	PGA1_c12840,amaB	416	3.5.1.116						4.06e-50	Q8VXY9			0.73
I7E3T9	PGA1_c27620	440	2.7.11.1						6.62e-12	P49695			0.64
I7E3T9	PGA1_c27620	440	2.3.2.27						1.45e-05	Q10051			0.64
I7E5V3	PGA1_c35840,fliI	442	7.1.2.2		WP_014876467	T			3.45e-105	O83417			2.28
I7E5V3	PGA1_c35840,fliI	442	7.4.2.8	K02412									0.87
I7EQ31	PGA1_c27050	505	3.1.4.4						1.7e-16	Q09706			0.64
I7DM64	PGA1_c04920,lldD1	388	1.1.2.3	K00101	WP_014879153	T			8.29e-112	Q7VPI9			3.15
I7F4R1	PGA1_262p01690	659	3.1.1.-						3.68e-12	P9WIQ9			0.64
I7F4R1	PGA1_262p01690	659	3.4.14.11						2.18e-15	Q82MI6			0.64
I7F4R1	PGA1_262p01690	659	3.1.1.84						3.3e-30	Q9L9D7			0.73
I7F4R1	PGA1_262p01690	659	3.1.1.93						6.24e-05	Q9NUJ1			0.64
I7DWF5	PGA1_c00210	292	2.3.1.189						0.01	C9ZFL1			0.64
I7F3T5	PGA1_c34590	283	5.2.1.8	K03769		T			2.95e-31	A4IKU2			2.36
I7EUZ0	PGA1_c08200,cobO	211	2.5.1.17	K19221	WP_014879417	T			1.3e-105	P29930			3.15
I7F0T5	PGA1_c31750	310	3.6.3.-						3.15e-57	P94440			0.78
I7E6L3	PGA1_262p02180,modA	271	5.3.3.7						0.005	A0A0A1H8I4			0.64
I7EW69	PGA1_c13160,mtlK	488	1.1.1.67	K00045	WP_014879811	T			8.1e-169	P33216	bp006121		4.19
I7EY23	PGA1_c10520,nuoK	101	7.1.1.-			T			2.45e-62	Q5LPT3			1.54
I7EY23	PGA1_c10520,nuoK	101	7.1.1.2	K00340					2.45e-62	Q5LPT3			1.65
I7EY23	PGA1_c10520,nuoK	101	1.6.5.11		WP_014874166								0.67
I7F0N9	PGA1_c21300,atsA	543	3.1.6.1	K01130	WP_014880441	T			9.02e-87	P51691			3.15
I7F0N9	PGA1_c21300,atsA	543	3.1.6.12						6.32e-34	P15848			0.73
I7DV48	PGA1_c33110,sardh	816	1.5.8.3		WP_014881383	T			6.94e-160	Q64380			2.37
I7DV48	PGA1_c33110,sardh	816	2.1.2.10						2.72e-49	B8D1D7			0.73
I7DV48	PGA1_c33110,sardh	816	1.5.8.4						2.06e-151	Q63342			0.94
I7DV48	PGA1_c33110,sardh	816	1.5.3.19						0	Q8GAI3			0.94
I7DV48	PGA1_c33110,sardh	816	1.5.3.10						2.46e-137	Q9AGP8			0.94
I7DWQ0	PGA1_262p01800	325	3.4.13.19						2.71e-28	M1VV65			0.73
I7DQ44	PGA1_c14900,hemB	332	4.2.1.24	K01698	WP_014874603	T			1.15e-150	P42504	bp008537		4.19
I7ERW8	PGA1_c34670,pip	326	3.4.11.5	K01259	WP_014881500	T			1.19e-124	O32449			3.24
I7EY80	PGA1_c21420,proS	451	6.1.1.15	K01881	WP_014880453	T			0	Q1GFI1			3.24
I7DPE1	PGA1_c12140	113	1.20.4.1	K00537		T			2.92e-31	P63622			2.36
I7F3Y4	PGA1_c35290	115	2.3.1.180						0.003	Q9KET5			0.64
I7DQ32	PGA1_c14800,ntrY	759	2.7.13.3	K13598	WP_014879942	T			3e-146	Q04850			3.24
I7DWG6	PGA1_c00260	392	3.1.-.-						2.59e-11	P06723			0.64
I7DWG6	PGA1_c00260	392	2.7.7.-						2.59e-11	P06723			0.64
I7DRG9	PGA1_c19760	617	3.6.3.-						7.08e-86	O34512			0.85
I7F2M1	PGA1_262p02310	260	3.5.3.18	K01482					9.63e-59	Q9I4E3			1.65
I7DYF0	PGA1_c07500	189	2.4.1.109						5.64e-06	Q20144			0.64
I7DYF0	PGA1_c07500	189	2.4.1.255						0.000343	Q9M8Y0			0.64
I7EZF9	PGA1_c16410,rluE	232	5.4.99.-		WP_014880054	T					bp013292		2.38
I7EZF9	PGA1_c16410,rluE	232	5.4.99.20	K06181					1.33e-75	Q9HX48	bp013292		2.6
I7DXX7	PGA1_c05470	123	3.5.2.17	K07127		T			2.34e-46	Q98CI7	bp008670		3.31
I7EKN8	PGA1_c10400,nuoD	404	7.1.1.-			T			0	Q5LPR7			1.7
I7EKN8	PGA1_c10400,nuoD	404	7.1.1.2	K00333					0	Q5LPR7			1.81
I7EYU2	PGA1_c13760,dltA1	534	6.1.1.13	K03367	WP_014879860	T							2.3
I7EYU2	PGA1_c13760,dltA1	534	6.2.1.54						5.58e-77	B8DEG2			0.78
I7DWP3	PGA1_262p01750	547	3.5.-.-						3.62e-31	A0A1I9LN01			0.73
I7DWP3	PGA1_262p01750	547	3.5.2.7						8.77e-07	A3CL31			0.64
I7DWP3	PGA1_262p01750	547	3.5.1.91						4.29e-48	Q68AP4			0.73
I7DXQ7	PGA1_c05120	314	5.1.1.8	K12658	WP_014879167	T			2.17e-139	B9R4E3			3.24
I7DV22	PGA1_c32880	421	2.1.1.176	K03500					9.51e-50	Q7VKC4			1.6
I7E501	PGA1_c32450,pyrF	243	4.1.1.23	K01591	WP_014881328	T			8.46e-114	Q28K56			3.15
I7EL05	PGA1_c11800,mcpA2	457	3.1.4.52						0.001	P76129			0.64
I7EL05	PGA1_c11800,mcpA2	457	2.7.13.3						0.002	Q8FW73			0.64
I7EL05	PGA1_c11800,mcpA2	457	2.7.11.1						0.000822	Q9ST27			0.64
I7ENX9	PGA1_c23090	263	1.1.1.-	K03366									0.87
I7ENX9	PGA1_c23090	263	1.1.1.76	K03366					1.71e-51	Q9ZNN8			1.65
I7ENX9	PGA1_c23090	263	1.1.1.304	K03366					2.18e-58	Q8CQD2			1.65
I7DST1	PGA1_c24460	192	1.-.-.-						1.26e-22	P45244			0.73
I7EZ01	PGA1_c14420	204	2.1.1.-						0.000462	C5D4Y0			0.64
I7EZ01	PGA1_c14420	204	2.1.1.197						5.28e-06	Q5ZT34			0.64
I7F0U3	PGA1_c22090	223	1.-.-.-						5.92e-30	A0R6D0			0.73
I7F0U3	PGA1_c22090	223	1.21.1.-						9.02e-09	P34273			0.64
I7F0U3	PGA1_c22090	223	1.13.11.79						3.28e-05	Q2RNG5			0.64
I7F0U3	PGA1_c22090	223	1.7.1.16						2.75e-29	Q5XW77			0.73
I7F0U3	PGA1_c22090	223	1.6.99.3						1.39e-07	Q60049			0.64
I7DQP9	PGA1_c16900,ung	217	3.2.2.27	K03648		T			3.57e-107	Q1GHJ4			2.48
I7DQP9	PGA1_c16900,ung	217	3.2.2.-		WP_014880094								0.67
I7DQV5	PGA1_c17510	183	5.2.1.8			T			1.13e-58	Q8G0J9			1.54
I7EYA8	PGA1_c11660	766	1.2.5.3	K03520					5.75e-112	P19913			1.72
I7EYA8	PGA1_c11660	766	1.17.5.2						2.19e-79	D7REY3			0.78
I7EYA8	PGA1_c11660	766	1.3.7.9						3.3e-51	O33819			0.78
I7EYA8	PGA1_c11660	766	1.17.1.4						4.69e-59	Q46799			0.78
I7EYA8	PGA1_c11660	766	1.2.99.8						4.19e-99	Q4J6M3			0.85
I7EYA8	PGA1_c11660	766	1.5.99.14						8.17e-88	Q933N0			0.85
I7EZK2	PGA1_c16990,fadB1	258	4.2.1.17		WP_014880102	T			7.88e-99	P24162			2.28
I7EZK2	PGA1_c16990,fadB1	258	5.3.3.18	K15866					2.45e-54	P77467			1.65
I7EZK2	PGA1_c16990,fadB1	258	4.2.1.116						1.49e-33	A4YI89			0.73
I7EZK2	PGA1_c16990,fadB1	258	3.8.1.7						1.61e-29	O85078			0.73
I7EZK2	PGA1_c16990,fadB1	258	4.2.1.150						5.62e-29	Q0AVM1			0.73
I7EZK2	PGA1_c16990,fadB1	258	5.3.3.8						3.7e-30	Q9WUR2			0.73
I7F171	PGA1_c33580,rnhB	205	3.1.26.4	K03470	WP_014881419	T			9.44e-116	Q1GD84			3.15
I7EP18	PGA1_c23490	764	1.14.13.40	K09461									0.87
I7EP18	PGA1_c23490	764	1.6.99.1						4.11e-73	C5D427			0.78
I7EP18	PGA1_c23490	764	1.14.13.209						3.38e-88	Q7X281			0.85
I7EK87	PGA1_c08920,ribB	373	4.1.99.12	K14652	WP_014879478	T			5.1e-103	Q9JZ77			3.15
I7EK87	PGA1_c08920,ribB	373	3.5.4.25	K14652					2.53e-101	A0Q3H7			1.72
I7EZU3	PGA1_c27960	363	1.1.1.-						6.34e-10	B1G894			0.64
I7EZU3	PGA1_c27960	363	1.1.1.370						1.97e-12	P40332			0.64
I7EZU3	PGA1_c27960	363	1.1.99.28						4.16e-10	Q07982			0.64
I7EZU3	PGA1_c27960	363	1.1.1.18						3.15e-13	Q8ZK57			0.64
I7EZU3	PGA1_c27960	363	1.1.1.312						5.06e-14	Q9KWL3			0.64
I7F2M7	PGA1_c29950,hemC	320	2.5.1.61	K01749	WP_014881145	T			7.04e-133	A1B853			3.24
I7F310	PGA1_c31120	193	3.6.1.9			T			1.59e-106	Q1GLE1			1.61
I7DL46	PGA1_c00900,fmt	301	2.1.2.9	K00604	WP_014878877	T			5.2e-174	Q1GDF7			3.24
I7DX60	PGA1_c03010,plsY	201	2.3.1.275	K08591		T			1.15e-91	Q5LX62			2.48
I7DX60	PGA1_c03010,plsY	201	2.3.1.-		WP_014879002								0.67
I7F051	PGA1_c29250	222	3.1.3.21						4.89e-12	F4JTE7			0.64
I7F051	PGA1_c29250	222	3.1.3.104						4.89e-12	F4JTE7			0.64
I7F051	PGA1_c29250	222	5.4.2.6						1.23e-13	O06995			0.64
I7F051	PGA1_c29250	222	3.1.3.50						5.21e-12	Q7ADF8			0.64
I7F051	PGA1_c29250	222	3.1.3.68						5.21e-12	Q7ADF8			0.64
I7F051	PGA1_c29250	222	3.1.3.23						5.21e-12	Q7ADF8			0.64
I7F051	PGA1_c29250	222	3.1.3.22						5.21e-12	Q7ADF8			0.64
I7F051	PGA1_c29250	222	3.1.3.102						2.06e-14	Q84MD8			0.64
I7F051	PGA1_c29250	222	2.7.1.26						2.06e-14	Q84MD8			0.64
I7F051	PGA1_c29250	222	3.1.3.96						1.04e-16	Q94529			0.64
I7DQV1	PGA1_c17460	443	3.4.24.75						3.67e-10	O05156			0.64
I7DQV1	PGA1_c17460	443	4.2.2.-						3.82e-15	O31976			0.64
I7DQV1	PGA1_c17460	443	4.2.2.n1						3.95e-15	O64046			0.64
I7DUW7	PGA1_c32140	754	2.7.13.3			T			1.03e-76	Q9P896			1.54
I7DUW7	PGA1_c32140	754	3.1.3.-						1.26e-73	Q8D5Z6			0.78
I7EMW1	PGA1_c19140	190	1.5.3.1	K00305					3.12e-09	Q9AGP0			1.51
I7E3W4	PGA1_c27980,pgi	546	5.3.1.9	K01810	WP_014880985	T			0	Q1GJQ5			3.24
I7DPJ7	PGA1_c12690	147	2.7.-.-						9.5e-14	P06628			0.64
I7DPJ7	PGA1_c12690	147	2.7.13.3						2.78e-16	Q8KIY1			0.64
I7DPJ7	PGA1_c12690	147	2.7.7.65						1.22e-11	Q9A5I5			0.64
I7DTQ4	PGA1_c28000,edd	607	4.2.1.12	K01690	WP_014880987	T			0	Q9Z3S0			3.24
I7DTQ4	PGA1_c28000,edd	607	4.2.1.9						8.2e-75	Q9K8E4			0.78
I7DWA1	PGA1_262p00340	332	3.6.3.-						1.97e-104	C0SP98			0.85
I7DWA1	PGA1_262p00340	332	7.4.2.10						6.92e-77	Q8X6W1			0.78
I7DXV6	PGA1_c05270	357	2.7.10.-						1.66e-06	P58593			0.64
I7DXV6	PGA1_c05270	357	2.7.10.2						3.27e-11	P71051			0.64
I7ESZ6	PGA1_262p02120,cheA	711	2.7.13.3	K03407	WP_014881838	T			0	Q53135			3.24
I7F1B5	PGA1_c34110,ilvE	288	2.6.1.42	K00826	WP_014876296	T			1.11e-76	Q4ULR3			3.08
I7DZ03	PGA1_c09700,lpxC	311	3.5.1.108	K02535		T			2.64e-82	Q2W0G6			2.48
I7DZ03	PGA1_c09700,lpxC	311	3.5.1.-		WP_014879529								0.67
I7EVH0	PGA1_c00320,dnaE1,dnaE2	1127	2.7.7.7	K14162	WP_014878833	T			0	Q5LVN0			3.24
I7DRV0	PGA1_c20760	554	1.8.1.2	K00381									0.87
I7DRV0	PGA1_c20760	554	1.7.7.1						2.86e-44	Q39161			0.73
I7DRV0	PGA1_c20760	554	1.8.7.1						2.24e-42	Q73YC1			0.73
I7DTY7	PGA1_c28890	264	1.7.5.1						1.6e-23	I3R9M8			0.73
I7DTY7	PGA1_c28890	264	1.97.1.2						3.05e-15	P80564			0.64
I7DTY7	PGA1_c28890	264	1.97.1.9						2.84e-26	Q9S1G9			0.73
I7DWZ8	PGA1_c02290	265	5.1.3.20						1.81e-11	A8GLC8			0.64
I7DWZ8	PGA1_c02290	265	1.1.1.133						3.36e-12	P37778			0.64
I7DWZ8	PGA1_c02290	265	5.1.3.2						2.57e-10	P47364			0.64
I7DWZ8	PGA1_c02290	265	4.1.1.35						2.75e-10	Q5PQX0			0.64
I7DWZ8	PGA1_c02290	265	1.1.1.281						5.06e-12	Q6T1X6			0.64
I7EUI3	PGA1_c06320	420	3.4.24.-		WP_014879267	T			6.87e-98	O86835			2.28
I7EUI3	PGA1_c06320	420	3.4.24.64						1.2e-88	Q42290			0.85
I7EV74	PGA1_c09350	450	2.6.1.-		WP_014879507	T							1.43
I7EV74	PGA1_c09350	450	2.6.1.96	K16871					9.65e-129	Q84P54			1.81
I7EV74	PGA1_c09350	450	2.6.1.76						3.3e-125	E1V7V7			0.94
I7E394	PGA1_c25520,dcyD	337	4.4.1.15		WP_014880786	T			5.09e-84	A8GFZ8			2.28
I7E394	PGA1_c25520,dcyD	337	4.4.1.25	K17950					0	A3SQG3			1.81
I7DSF2	PGA1_c23120	269	1.1.1.-	K03366									0.87
I7DSF2	PGA1_c23120	269	1.1.1.76	K03366					9.64e-36	Q9ZNN8			1.6
I7DSF2	PGA1_c23120	269	1.1.1.304	K03366					1.63e-39	Q48436			1.6
I7DSF2	PGA1_c23120	269	1.1.1.100						4.5e-40	P51831			0.73
I7DSF2	PGA1_c23120	269	1.1.1.127						4.72e-35	Q05528			0.73
I7DSF2	PGA1_c23120	269	1.1.1.14						1.87e-40	Q59787			0.73
I7DSF2	PGA1_c23120	269	1.1.1.16						1.87e-40	Q59787			0.73
I7F1W2	PGA1_c26220	761	3.2.1.82						0.007	P15922			0.64
I7F234	PGA1_c27280	626	3.1.3.-						1.22e-15	Q742C0			0.64
I7F234	PGA1_c27280	626	2.7.13.3						5.54e-24	Q9LCC2			0.73
I7DWY7	PGA1_78p00200	247	4.2.1.44						0.000325	Q5KYR1			0.64
I7DZ14	PGA1_c09850	788	2.7.7.8						3.58e-11	Q4FVL0			0.64
I7E5C4	PGA1_c34030,thiQ	230	7.6.2.15			T							0.76
I7E5C4	PGA1_c34030,thiQ	230	3.6.3.-		WP_014881453				4.28e-106	Q1GCR8			1.52
I7EJ14	PGA1_c04040,paaE	357	1.14.15.30						1.44e-50	A0R525	bp005210		1.68
I7EJ14	PGA1_c04040,paaE	357	1.6.2.2						8.72e-20	B0CQN7	bp005210		1.59
I7EJ14	PGA1_c04040,paaE	357	1.1.1.404						4.45e-26	Q47914	bp005210		1.68
I7EJ14	PGA1_c04040,paaE	357	1.14.12.17						1.01e-19	Q88PP0	bp005210		1.59
I7EKD1	PGA1_c09440	598	2.7.7.65						3.69e-28	Q9A5I5			0.73
I7EYR1	PGA1_c13400,purC	253	6.3.2.6	K01923	WP_014874460	T			2.69e-165	Q167J5	bp012567		4.19
I7DP63	PGA1_c11120	393	3.1.5.1	K01129					4.63e-20	A1JJQ7			1.51
I7E253	PGA1_c20990,thrS	648	6.1.1.3	K01868	WP_014880416	T			0	Q1GFW2			3.24
I7EX11	PGA1_c16320	492	3.1.4.-						1.84e-158	Q9KL18			0.94
I7EX11	PGA1_c16320	492	3.1.3.-						1.6e-28	Q9KLR1			0.73
I7EMB6	PGA1_c16870	557	3.4.24.-						0.002	Q9L7Q2			0.64
I7ESR1	PGA1_262p01010,dppD	330	7.4.2.10						4.28e-77	A1A967			0.78
I7ESR1	PGA1_262p01010,dppD	330	3.6.3.-						2.88e-103	Q8YBN6			0.85
I7F216	PGA1_c36250	413	3.4.24.40						1.4e-26	Q11137			0.73
I7F216	PGA1_c36250	413	5.1.3.37						2.86e-16	Q44496			0.64
I7DPR6	PGA1_c13460	77	2.8.1.-	K04085									0.87
I7EQ68	PGA1_c27610	453	2.7.1.-						2e-10	D0ZLR9			0.64
I7EQ68	PGA1_c27610	453	1.1.1.243						3.64e-58	O85057			0.78
I7EQ68	PGA1_c27610	453	1.14.14.52						3.64e-58	O85057			0.78
I7EQ68	PGA1_c27610	453	1.14.14.51						3.64e-58	O85057			0.78
I7EQ68	PGA1_c27610	453	1.1.1.144						3.64e-58	O85057			0.78
I7EQ68	PGA1_c27610	453	3.1.1.61						3.37e-06	P62646			0.64
I7EQ68	PGA1_c27610	453	3.5.1.44						3.37e-06	P62646			0.64
I7EQ68	PGA1_c27610	453	2.7.13.3						1.71e-07	Q54SP4			0.64
I7EQ68	PGA1_c27610	453	3.1.4.-						3.49e-06	Q9KSB1			0.64
I7EQQ0	PGA1_c29980	267	1.1.1.159	K00076					1.13e-30	O07575			1.6
I7EQQ0	PGA1_c29980	267	1.1.1.100						2.44e-30	P38004			0.73
I7EQQ0	PGA1_c29980	267	1.1.1.206						5.95e-34	P50162			0.73
I7EQQ0	PGA1_c29980	267	1.1.1.385						7.09e-32	Q8KWT4			0.73
I7EQQ0	PGA1_c29980	267	1.1.1.6						2.5e-31	Q92EU6			0.73
I7EVI1	PGA1_c00470	103	3.6.4.13						0.003	Q966L9			0.64
I7EW31	PGA1_c02820	218	1.3.1.75						0.007	B6SZW0			0.64
I7DX52	PGA1_65p00190	349	4.-.-.-						1.24e-05	O34886			0.64
I7DX52	PGA1_65p00190	349	5.1.3.2						1.07e-07	Q59083			0.64
I7DX52	PGA1_65p00190	349	1.1.1.266						3.05e-05	Q6E7F2			0.64
I7DX52	PGA1_65p00190	349	5.1.3.5						0.000367	Q9FI17			0.64
I7E6D5	PGA1_262p01380	483	1.2.1.-		WP_014881768	T							1.43
I7E6D5	PGA1_262p01380	483	1.2.1.3	K00128					4.08e-106	O34660			1.72
I7E6D5	PGA1_262p01380	483	1.2.1.36						5.88e-100	O94788			0.85
I7E6D5	PGA1_262p01380	483	1.2.1.5						2.31e-105	P40047			0.85
I7E4D5	PGA1_c29940,hemE	344	4.1.1.37	K01599	WP_014881144	T			0	Q1GDK6			3.24
I7EWU5	PGA1_c05850,ruvC	165	3.1.22.4	K01159	WP_014879232	T			1.42e-94	Q5LNT6			3.15
I7F1H5	PGA1_c24860,purE	166	5.4.99.18	K01588		T			3.99e-67	P12044			2.41
I7F1H5	PGA1_c24860,purE	166	4.1.1.21		WP_014880743								0.67
I7EKV6	PGA1_c11250,plsX	367	2.3.1.274	K03621		T			0	Q1GI68			2.57
I7ELW6	PGA1_c15230	403	2.1.1.176	K03500					1.12e-35	A6TEU2			1.6
I7EYQ7	PGA1_c23480	257	1.1.1.30						7.86e-48	O86034			0.73
I7EYQ7	PGA1_c23480	257	1.1.1.385						1.96e-40	P39640			0.73
I7EYQ7	PGA1_c23480	257	1.3.1.-						1e-39	P41177			0.73
I7EYQ7	PGA1_c23480	257	1.1.1.100						1.21e-42	Q9X248			0.73
I7E5M0	PGA1_c34980,rbsK	290	2.7.1.15	K00852		T			4.2e-36	P44331			2.36
I7EKA3	PGA1_c09100,thiO	324	1.4.3.19	K03153					5.53e-12	S5FMM4			1.51
I7EKA3	PGA1_c09100,thiO	324	1.4.99.5						0.000601	G3XD12			0.64
I7EKA3	PGA1_c09100,thiO	324	2.8.1.10						3.37e-08	Q3M859			0.64
I7EZT3	PGA1_c27860	662	3.1.1.-						6.71e-13	P9WIQ9			0.64
I7EZT3	PGA1_c27860	662	3.4.14.11						1.26e-15	Q81PE9			0.64
I7EZT3	PGA1_c27860	662	3.1.1.84						5.09e-32	Q9L9D7			0.73
I7ETX3	PGA1_c04380,wcaL	419	2.4.-.-						1.46e-24	P26388			0.73
I7ETX3	PGA1_c04380,wcaL	419	2.4.1.346						4.26e-11	P9WMZ3			0.64
I7ETX3	PGA1_c04380,wcaL	419	2.4.1.301						3.23e-09	Q65CC7			0.64
I7EKX0	PGA1_c11390,rhlE2	447	3.6.1.-			T							0.76
I7EKX0	PGA1_c11390,rhlE2	447	3.6.4.13	K11927					3.67e-123	P25888	bp004891		2.76
I7F0A1	PGA1_c19800,pepA	491	3.4.11.1	K01255	WP_014880331	T			0	A8LI79			3.24
I7F0A1	PGA1_c19800,pepA	491	3.4.11.10			T			0	A8LI79			1.7
I7DTL8	PGA1_c27640,fdhB	197	1.7.5.1						1.06e-05	P19318			0.64
I7DTL8	PGA1_c27640,fdhB	197	1.97.1.2						3.8e-07	P80564			0.64
I7DTL8	PGA1_c27640,fdhB	197	1.2.1.58						0.000526	Q8L3A9			0.64
I7DTL8	PGA1_c27640,fdhB	197	1.97.1.9						1.6e-06	Q9S1G9			0.64
I7EXS8	PGA1_c09610,murG	365	2.4.1.227	K02563	WP_014874080	T			0	Q1GIV1			3.24
I7E6X1	PGA1_65p00220,rfbA	296	2.7.7.24	K00973		T	fig|391619.35.peg.24		1.14e-139	P37779			3.39
I7ERQ5	PGA1_c34070,lcfB2	500	6.2.1.3		WP_014881457	T			5.68e-98	O07610	bp000006		3.23
I7ERQ5	PGA1_c34070,lcfB2	500	6.2.1.-	K18661							bp000006		1.82
I7ERQ5	PGA1_c34070,lcfB2	500	6.2.1.n3						1.39e-79	Q8H151	bp000006		1.73
I7DM29	PGA1_c04620	142	5.2.1.8			T			7.73e-28	O52980			1.49
I7DQG6	PGA1_c15680,tesB	288	3.1.2.-	K10805	WP_014880003	T			1.24e-72	P0AGG3			3.08
I7DQG6	PGA1_c15680,tesB	288	3.1.2.2						3.09e-62	P58137			0.78
I7DQG6	PGA1_c15680,tesB	288	3.1.2.11						3.09e-62	P58137			0.78
I7DQG6	PGA1_c15680,tesB	288	3.1.2.5						3.09e-62	P58137			0.78
I7DQG6	PGA1_c15680,tesB	288	3.1.2.1						3.09e-62	P58137			0.78
I7DQG6	PGA1_c15680,tesB	288	3.1.2.27						3.09e-62	P58137			0.78
I7DQG6	PGA1_c15680,tesB	288	3.1.2.3						3.09e-62	P58137			0.78
I7DZA4	PGA1_c10460,nuoG	672	7.1.1.-			T							0.76
I7DZA4	PGA1_c10460,nuoG	672	7.1.1.2	K00336					0	P24918			1.81
I7DZA4	PGA1_c10460,nuoG	672	1.6.5.11		WP_014879594								0.67
I7DZA4	PGA1_c10460,nuoG	672	1.6.99.3						0	P24918			0.94
I7EIU8	PGA1_c03350,ispB	332	2.5.1.-		WP_014879030	T					bp006323		2.38
I7EIU8	PGA1_c03350,ispB	332	2.5.1.90	K02523					3.05e-80	P0AD58	bp006323		2.6
I7EIU8	PGA1_c03350,ispB	332	2.5.1.84						5.28e-77	O24743	bp006323		1.73
I7EIU8	PGA1_c03350,ispB	332	2.5.1.30						9.68e-57	P55785	bp006323		1.73
I7EIU8	PGA1_c03350,ispB	332	2.5.1.29						4.9e-51	P95999	bp006323		1.73
I7F224	PGA1_c27180	450	6.3.1.2	K01915					1.49e-68	P0C7B6			1.65
I7F224	PGA1_c27180	450	6.3.2.-						8.03e-83	Q936T0			0.85
I7ET35	PGA1_c00610	248	2.3.1.-						3.13e-05	P94482			0.64
I7ET35	PGA1_c00610	248	6.3.5.2						1e-06	Q7VG78			0.64
I7ET35	PGA1_c00610	248	2.3.1.178						1.22e-05	Q93RW2			0.64
I7F2R2	PGA1_78p00410	610	6.3.2.55						1.01e-08	Q2G1M8			0.64
I7F2R2	PGA1_78p00410	610	6.3.2.54						2.11e-37	Q2G1M9			0.73
I7F2R2	PGA1_78p00410	610	6.3.2.39						4.41e-10	Q47318			0.64
I7F2R2	PGA1_78p00410	610	6.3.2.38						6.75e-55	Q76BS7			0.78
I7F269	PGA1_262p00350	600	3.4.11.9	K01262					4.44e-117	C0SCV1			1.72
I7F105	PGA1_c22960	414	2.7.7.-						3.47e-35	Q9KVG7			0.73
I7DPX7	PGA1_c14130	194	4.-.-.-						8.71e-35	O31608			0.73
I7DPX7	PGA1_c14130	194	4.2.2.-						5.41e-39	O31976			0.73
I7DPX7	PGA1_c14130	194	4.2.2.n1						5.46e-39	O64046			0.73
I7EMD4	PGA1_c17120,purL	721	6.3.5.3	K23269	WP_014880114	T			0	Q5LS98			3.24
I7EZA4	PGA1_c15510,proB	368	2.7.2.11	K00931	WP_014879991	T			0	Q1GHC9			3.24
I7DTD1	PGA1_c26530,mrdA	648	3.4.16.4	K05515					7.02e-126	P44469			1.81
I7F0Y4	PGA1_c22660	343	3.1.-.-						6.22e-06	P16407			0.64
I7F0Y4	PGA1_c22660	343	2.7.7.-						6.22e-06	P16407			0.64
I7E0X2	PGA1_c16400	188	3.1.-.-						0.000523	Q6NKI3			0.64
I7EUJ1	PGA1_c06420	169	2.3.-.-						2.96e-05	P13249			0.64
I7EUJ1	PGA1_c06420	169	2.3.1.-						5.91e-09	P63417			0.64
I7F3B7	PGA1_c32460	138	3.6.1.55	K03574									0.87
I7F3B7	PGA1_c32460	138	3.6.1.12						1.07e-06	Q8FFM5			0.64
I7F3B7	PGA1_c32460	138	3.6.1.9						1.07e-06	Q8FFM5			0.64
I7F3B7	PGA1_c32460	138	3.6.1.23						1.07e-06	Q8FFM5			0.64
I7EUL7	PGA1_c06720	141	3.6.2.1						1.29e-17	F4K1R2			0.64
I7EUL7	PGA1_c06720	141	3.9.1.-						5.66e-13	P44956			0.64
I7EUL7	PGA1_c06720	141	3.6.1.29						7.29e-13	Q1KZG4			0.64
I7DPN0	PGA1_c13050	304	3.1.27.-						3.25e-27	Q1LZ83			0.73
I7DVZ3	PGA1_c36010,kdsD	323	5.3.1.13	K06041	WP_014881594	T			8.11e-90	Q8D1Q8			3.15
I7EQ92	PGA1_c27970,smoK	331	3.6.3.-	K10111									0.87
I7EQ92	PGA1_c27970,smoK	331	7.5.2.1						6.94e-115	Q664X5			0.85
I7ER78	PGA1_c31610	497	1.6.1.1	K00322					3.18e-149	P9WHH5			1.81
I7F040	PGA1_c19110,sodB	199	1.15.1.1	K04564	WP_014874932	T			7.94e-131	O30970			3.24
I7ELK4	PGA1_c14100,aroB	375	4.2.3.4	K01735		T			0	Q1GGQ1			2.57
I7F175	PGA1_c33630	344	2.3.1.-						0.002	A0A097ZPE0			0.64
I7F175	PGA1_c33630	344	2.3.1.39						1.31e-06	P71019			0.64
I7F175	PGA1_c33630	344	2.3.1.41						0.003	P9WQE3			0.64
I7DPV3	PGA1_c13870	330	1.3.1.-	K19745									0.87
I7DPV3	PGA1_c13870	330	1.6.5.-						2.79e-86	O07615			0.85
I7DPV3	PGA1_c13870	330	1.1.1.1						1.19e-10	P00331			0.64
I7DPV3	PGA1_c13870	330	1.6.5.5						7.86e-13	Q0MVN8			0.64
I7DPV3	PGA1_c13870	330	1.3.1.84						0	Q5LS56			0.94
I7DWA6	PGA1_262p00390	352	5.1.3.3	K01785		T			1.07e-59	Q5R8U1			2.41
I7DL26	PGA1_c00600	200	6.3.5.2						5.25e-07	Q7VG78			0.64
I7DL26	PGA1_c00600	200	2.3.1.-						2.11e-05	Q9HX72			0.64
I7EUN4	PGA1_c06940	765	1.17.4.1	K00525		T			1.03e-106	P9WH76			2.48
I7EXT0	PGA1_c19670,cydA	474	1.10.3.-		WP_014880322	T			3.17e-80	P94364			2.21
I7EXT0	PGA1_c19670,cydA	474	7.1.1.7	K00425					1.65e-66	P0ABK1			1.65
I7EXT0	PGA1_c19670,cydA	474	7.1.1.3						1.68e-63	P26459			0.78
I7DX32	PGA1_78p00600	360	1.8.98.2						0.000789	Q8GY89			0.64
I7E118	PGA1_c16980	298	2.7.7.48						1.13e-08	P0C6X2			0.64
I7E118	PGA1_c16980	298	3.1.-.-						1.13e-08	P0C6X2			0.64
I7E118	PGA1_c16980	298	2.1.1.-						1.13e-08	P0C6X2			0.64
I7E118	PGA1_c16980	298	3.6.4.13						1.13e-08	P0C6X2			0.64
I7E118	PGA1_c16980	298	3.4.22.69						1.13e-08	P0C6X2			0.64
I7E118	PGA1_c16980	298	3.1.13.-						1.13e-08	P0C6X2			0.64
I7E118	PGA1_c16980	298	3.4.19.12						1.13e-08	P0C6X2			0.64
I7E118	PGA1_c16980	298	3.6.4.12						1.13e-08	P0C6X2			0.64
I7E118	PGA1_c16980	298	4.6.1.1						7.31e-09	P0DKX7			0.64
I7E118	PGA1_c16980	298	5.1.3.37						1.04e-06	Q44494			0.64
I7E118	PGA1_c16980	298	4.2.2.3						5.16e-06	Q9ZFG9			0.64
I7E3H6	PGA1_c26160,uvrB	732	3.6.4.13						3.37e-07	A2QFL3			0.64
I7E523	PGA1_c32810	439	3.4.24.-	K07263					3.66e-31	O32965			1.6
I7EW06	PGA1_c02560,pcaH	241	1.13.11.3	K00449	WP_014878971	T			7.94e-110	P00437			3.15
I7EW06	PGA1_c02560,pcaH	241	1.13.11.1						4.5e-14	P07773			0.64
I7EUA5	PGA1_c05400	327	2.4.1.12						0.001	P0CW87			0.64
I7EVP1	PGA1_c11070,xthA	268	3.1.11.2	K01142	WP_014879645	T			2.99e-45	P44318			3.03
I7EVP1	PGA1_c11070,xthA	268	4.2.99.18						5.27e-26	P23196			0.73
I7DQ83	PGA1_c15260,recA	355	3.1.-.-						4.1e-113	P0A5U5			0.85
I7E0B8	PGA1_c14560,metA,metAA	305	2.3.1.31	K00651		T			0	Q1GGV4	bp005118		3.52
I7E0B8	PGA1_c14560,metA,metAA	305	2.3.1.46	K00651	WP_014879923								1.54
I7F4V6	PGA1_262p02240,znuC	258	7.2.2.-	K09817		T							1.63
I7F4V6	PGA1_262p02240,znuC	258	3.6.3.-		WP_014881850				2.02e-119	Q1GL85			1.52
I7EL31	PGA1_c12110	140	3.1.2.-						2.33e-06	P20378			0.64
I7DPB2	PGA1_c11830	121	2.7.1.25						0.001	Q49UM5			0.64
I7EJ93	PGA1_c04940	170	3.1.1.77						0.001	Q9HVD1			0.64
I7EX08	PGA1_c06550,glmM	448	5.4.2.10	K03431	WP_014879288	T			0	Q1GE79			3.24
I7DSI3	PGA1_c23420	1106	2.4.1.-						1.03e-09	Q6YRM6			0.64
I7DSA0	PGA1_c22550	378	2.7.7.7	K02338					3.57e-07	O54376			1.51
I7ETL9	PGA1_c02940,ubiA	320	2.5.1.39	K03179		T			3.93e-74	Q54U71			2.41
I7ETL9	PGA1_c02940,ubiA	320	2.5.1.-		WP_014878999								0.67
I7EVI4	PGA1_c10390,nuoC	201	7.1.1.-			T			7.56e-128	Q5LPR5			1.7
I7EVI4	PGA1_c10390,nuoC	201	7.1.1.2	K00332					7.56e-128	Q5LPR5			1.81
I7EVI4	PGA1_c10390,nuoC	201	1.6.5.11		WP_014879588								0.67
I7EMK8	PGA1_c18040	200	1.1.-.-						6.11e-10	E9QUT3			0.64
I7EMK8	PGA1_c18040	200	1.1.1.184						1.41e-07	P08074			0.64
I7EMK8	PGA1_c18040	200	1.1.1.252						7.62e-09	Q12634			0.64
I7EMK8	PGA1_c18040	200	1.1.1.10						3.95e-07	Q7Z4W1			0.64
I7DX43	PGA1_c02810,pobA	408	1.14.13.2	K00481		T			0	P00438	bp011899		3.52
I7DX43	PGA1_c02810,pobA	408	1.14.13.33						6.21e-127	C4TP09	bp011899		1.89
I7DX43	PGA1_c02810,pobA	408	1.14.13.9						2.73e-08	Q6C9M8	bp011899		1.59
I7EZS8	PGA1_c27810,nadC	284	2.4.2.19	K00767	WP_014880970	T			4.27e-105	P77938			3.15
I7EVU1	PGA1_c11680	179	2.3.1.189						0.001	C5C246			0.64
I7EVU1	PGA1_c11680	179	2.3.1.280						0.002	P16691			0.64
I7DLZ2	PGA1_c04220	204	2.3.1.-						1.3e-20	P26839			0.64
I7DLZ2	PGA1_c04220	204	2.3.1.79						1.8e-12	P37515			0.64
I7DLZ2	PGA1_c04220	204	2.3.1.28						1.69e-24	P50868			0.73
I7DXE0	PGA1_c03900	512	3.1.11.5	K01144									0.87
I7DXE0	PGA1_c03900	512	3.6.4.12						7.42e-06	Q9RT63			0.64
I7DPU4	PGA1_c13770	452	1.14.14.1						1.26e-13	P29981			0.64
I7DPU4	PGA1_c13770	452	1.14.15.15						4.37e-14	Q02318			0.64
I7DPU4	PGA1_c13770	452	1.14.14.79						7.77e-14	Q6ZWL3			0.64
I7DPU4	PGA1_c13770	452	1.14.14.87						6.56e-15	Q9SWR5			0.64
I7DYS5	PGA1_c08930,ribH1,ribH	183	2.5.1.78	K00794		T			6.9e-67	Q28LT2			2.41
I7DYS5	PGA1_c08930,ribH1,ribH	183	2.5.1.9		WP_014874001								0.67
I7E0C8	PGA1_c14680,lipA	338	2.8.1.8	K03644		T			0	Q1GGW2			2.57
I7E3M8	PGA1_c26800,paaK1	436	6.2.1.30	K01912	WP_014880890	T			0	Q9L9C1			3.24
I7E3M8	PGA1_c26800,paaK1	436	6.2.1.2						1.19e-06	Q0P4F7			0.64
I7E3M8	PGA1_c26800,paaK1	436	6.2.1.3						0.004	Q8XDR6			0.64
I7EWK4	PGA1_c14710,hpt	181	2.4.2.8	K00760	WP_014879933	T			1.24e-90	P37171			3.15
I7EZ13	PGA1_c24680,gyaR1	318	1.1.1.26			T			1.8e-76	Q8U3Y2			1.54
I7EZ13	PGA1_c24680,gyaR1	318	1.1.1.81						3.11e-59	C6DJ88			0.78
I7EZ13	PGA1_c24680,gyaR1	318	1.1.1.79						3.11e-59	C6DJ88			0.78
I7EZ13	PGA1_c24680,gyaR1	318	1.1.1.29						7.81e-62	P36234			0.78
I7EZ13	PGA1_c24680,gyaR1	318	1.1.1.237						2.32e-62	Q65CJ7			0.78
I7F3U6	PGA1_c34740,hemH	353	4.99.1.1	K01772	WP_014881505	T			0	Q59735			3.24
I7F3U6	PGA1_c34740,hemH	353	4.99.1.9	K01772									0.87
I7E0J6	PGA1_c15340	217	3.1.-.-						0.006	Q6AYT7			0.64
I7E0J6	PGA1_c15340	217	3.1.1.23						0.006	Q6AYT7			0.64
I7E431	PGA1_c28870	946	1.8.5.6	K21307					0	D3RNN8			1.81
I7E431	PGA1_c28870	946	1.17.5.3						1.31e-18	P24183			0.64
I7E431	PGA1_c28870	946	1.8.5.5						1.79e-25	P37600			0.73
I7E431	PGA1_c28870	946	1.8.5.3						3.3e-19	P45004			0.64
I7E431	PGA1_c28870	946	1.8.99.-						2.38e-20	P77783			0.64
I7E431	PGA1_c28870	946	1.9.6.1						1.94e-18	Q67QZ1			0.64
I7EXZ7	PGA1_c10320	527	6.4.1.4	K01969		T			0	Q3ULD5			2.57
I7EXZ7	PGA1_c10320	527	6.4.1.3						7.79e-76	P54541			0.78
I7EXZ7	PGA1_c10320	527	2.1.3.1						4.25e-79	Q8GBW6			0.78
I7EQ06	PGA1_c26700	500	6.6.1.1						1.88e-12	P26239			0.64
I7EQ06	PGA1_c26700	500	3.6.4.12						7.98e-05	Q86B14			0.64
I7EQ06	PGA1_c26700	500	3.4.21.-						0.000156	Q9HSC3			0.64
I7EIA5	PGA1_c00870,def1,def	172	3.5.1.88	K01462	WP_014876077	T			6.27e-64	Q92SH6			3.08
I7EQ96	PGA1_c28020,frk	323	2.7.1.4	K00847	WP_014880989	T			4.24e-71	P42720			3.08
I7ET25	PGA1_c00490	269	3.6.-.-						1.11e-06	P37522			0.64
I7ET82	PGA1_c01160,chvG	570	2.7.13.3	K14980	WP_014878894	T			1.79e-100	P72292			3.15
I7EX93	PGA1_c07560,cobS	252	2.7.8.26	K02233		T			3.57e-47	P29936			2.36
I7DWX5	PGA1_78p00100,hmp	396	1.14.12.17	K05916	WP_014876540	T			4.58e-122	Q87F90			3.24
I7E104	PGA1_c16830,gpt	167	2.4.2.22	K00769	WP_014874783	T			3.08e-112	Q5LRI5			3.15
I7EJ61	PGA1_c04540	410	4.2.1.82						2.49e-50	D4GP40			0.73
I7EJ61	PGA1_c04540	410	4.2.1.140						1.98e-58	Q6L1T2			0.78
I7EJ61	PGA1_c04540	410	4.2.1.39						1.98e-58	Q6L1T2			0.78
I7EJ61	PGA1_c04540	410	4.2.1.6						1.98e-58	Q6L1T2			0.78
I7EP04	PGA1_c23340	453	6.3.1.2	K01915					2.15e-68	P0C7B6			1.65
I7EP04	PGA1_c23340	453	6.3.2.-						6.65e-83	Q936T0			0.85
I7F4U3	PGA1_262p02090	128	3.1.3.-						7.29e-08	P0C5S6			0.64
I7F4U3	PGA1_262p02090	128	2.7.-.-						3.23e-07	P52942			0.64
I7F4U3	PGA1_262p02090	128	3.1.1.61						9.2e-08	Q2WAJ8			0.64
I7F4U3	PGA1_262p02090	128	3.5.1.44						9.2e-08	Q2WAJ8			0.64
I7F4U3	PGA1_262p02090	128	2.7.13.3						6.56e-09	Q56128			0.64
I7F4U3	PGA1_262p02090	128	3.1.4.-						2.72e-08	Q9KSB1			0.64
I7EZJ5	PGA1_c16890,trpD	342	2.4.2.18	K00766	WP_014880093	T			0	Q1GHJ3			3.24
I7DXY6	PGA1_c05590	412	1.3.8.7	K00249					1.01e-42	Q3SZB4			1.6
I7DXY6	PGA1_c05590	412	1.3.99.-						4.66e-130	Q8K370			0.94
I7E4Y0	PGA1_c32020	418	1.14.13.218	K20940					2.65e-83	Q9HWG9			1.72
I7E4Y0	PGA1_c32020	418	1.14.13.114						5.43e-24	A0A0H3LKL4			0.73
I7E4Y0	PGA1_c32020	418	1.14.13.113						6.95e-18	B6D1N4			0.64
I7E4Y0	PGA1_c32020	418	1.14.13.222						1.07e-24	H1ZZA4			0.73
I7E4Y0	PGA1_c32020	418	1.14.13.1						4.44e-20	Q53552			0.64
I7E4Y0	PGA1_c32020	418	1.14.13.24						1.24e-16	Q9F131			0.64
I7EPD9	PGA1_c24740	355	2.1.1.320						1.31e-72	Q6GQ37			0.78
I7EW53	PGA1_c03070	253	3.2.2.27	K21929					5.1e-47	Q5SKC5			1.6
I7EW53	PGA1_c03070	253	3.1.11.-						3.34e-20	P30314			0.64
I7EW53	PGA1_c03070	253	2.7.7.7						3.34e-20	P30314			0.64
I7EYL3	PGA1_c22980,virD2	602	3.1.-.-						1.67e-20	P06668			0.64
I7EZA7	PGA1_c15560	287	2.3.1.270	K22617									0.87
I7EZA7	PGA1_c15560	287	2.3.1.67						2.96e-06	P0C1Q3			0.64
I7EZA7	PGA1_c15560	287	2.3.1.23						2.96e-06	P0C1Q3			0.64
I7EZA7	PGA1_c15560	287	2.3.1.25						8.11e-10	Q8L7R3			0.64
I7EZA7	PGA1_c15560	287	2.3.1.51						8.76e-16	Q9JU41			0.64
I7EZA7	PGA1_c15560	287	2.3.1.n4						1.97e-07	Q9LLY4			0.64
I7F2Q8	PGA1_78p00360	252	7.2.2.-	K02013									0.87
I7F2Q8	PGA1_78p00360	252	3.6.3.-						5.87e-47	O34510			0.73
I7F2Q8	PGA1_78p00360	252	7.2.2.16						5.02e-52	P07821			0.78
I7DXN1	PGA1_c04800,trmB	254	2.1.1.33	K03439	WP_014879146	T			2.06e-145	Q1GK88			3.24
I7DNS2	PGA1_c10030,pntA	523	7.1.1.1	K00324		T			0	Q9ALA2			2.57
I7DNS2	PGA1_c10030,pntA	523	1.6.1.2	K00324	WP_014874120								1.54
I7F2V3	PGA1_c30840,cpdA	276	3.1.4.53	K03651		T			2.78e-44	Q6NDI4			2.36
I7EZN7	PGA1_c27250	230	3.1.1.61						1.66e-05	Q2RZD2			0.64
I7EZN7	PGA1_c27250	230	3.5.1.44						1.66e-05	Q2RZD2			0.64
I7EZN7	PGA1_c27250	230	2.7.13.3						0.000263	Q54Q69			0.64
I7EZN7	PGA1_c27250	230	2.7.11.1						0.000263	Q54Q69			0.64
I7F3X5	PGA1_c35140	199	3.6.1.9			T			1.33e-106	Q1GCM3			1.61
I7DWQ7	PGA1_262p01850	268	4.2.1.155	K20036					5.74e-170	Q5LLW6			1.81
I7DWQ7	PGA1_262p01850	268	4.2.1.116						3.58e-33	A4YI89			0.73
I7DWQ7	PGA1_262p01850	268	5.1.2.3						1.46e-22	A7N1D2			0.73
I7DWQ7	PGA1_262p01850	268	5.3.3.8						1.46e-22	A7N1D2			0.73
I7DWQ7	PGA1_262p01850	268	1.1.1.35						1.46e-22	A7N1D2			0.73
I7DWQ7	PGA1_262p01850	268	4.2.1.17						4.1e-27	F4JML5			0.73
I7DWQ7	PGA1_262p01850	268	4.2.1.18						5e-22	Q54HG7			0.73
I7DTL0	PGA1_c27540	385	2.1.1.79	K00574					1.47e-37	P0A9H8			1.6
I7DUB1	PGA1_c30110,ccoO	242	1.9.3.1		WP_014875891	T							1.43
I7F2K8	PGA1_c29690	284	3.4.21.-						2.67e-08	P48740			0.64
I7F2K8	PGA1_c29690	284	3.4.21.19						4.61e-08	P80057			0.64
I7F2K8	PGA1_c29690	284	3.4.21.69						6.06e-07	Q28278			0.64
I7F2K8	PGA1_c29690	284	3.4.21.22						1.53e-06	Q804X6			0.64
I7E5S4	PGA1_c35540,alkJ2	538	1.1.99.-		WP_014881570	T							1.43
I7E5S4	PGA1_c35540,alkJ2	538	1.2.1.8						8.29e-137	Q13NG7			0.94
I7E5S4	PGA1_c35540,alkJ2	538	1.1.99.32						6.11e-134	Q47944			0.94
I7E5S4	PGA1_c35540,alkJ2	538	1.1.99.1						1.34e-141	Q6UPE0			0.94
I7DZD3	PGA1_c10750	408	3.4.24.75						0.008	O05156			0.64
I7DYJ5	PGA1_c08120,cobK	246	1.3.1.54	K05895	WP_014879409	T			2.26e-105	O68098			3.15
I7DYJ5	PGA1_c08120,cobK	246	1.3.1.106	K05895					2.27e-22	O87691			1.6
I7EMK3	PGA1_c17980,csaA	112	6.1.1.10						1.38e-13	Q9V011			0.64
I7F2C2	PGA1_c28490	1463	5.1.1.13						4.08e-105	O68008			0.85
I7F2C2	PGA1_c28490	1463	5.1.1.11						4.08e-105	O68008			0.85
I7F2C2	PGA1_c28490	1463	2.3.1.-						9.83e-110	P39847			0.85
I7F2C2	PGA1_c28490	1463	1.-.-.-						2.74e-124	Q70LM4			0.94
I7F245	PGA1_c27430	375	2.1.1.14	K00549					4.47e-15	C3MWZ5			1.51
I7F245	PGA1_c27430	375	4.4.1.23						7.78e-13	Q56837			0.64
I7E148	PGA1_c17440,bcp	153	1.11.1.15	K03564	WP_014874841	T			1.52e-53	Q83CY8			3.08
I7ERJ4	PGA1_c33280	392	2.6.1.83						1.43e-49	Q3Z8H5			0.73
I7E696	PGA1_262p00720	337	3.1.3.3						6.84e-06	P17906			0.64
I7E696	PGA1_262p00720	337	2.7.11.1						2.33e-15	P42411			0.64
I7F1M7	PGA1_c35160,coaE	197	2.7.1.24	K00859	WP_014881540	T			5.93e-85	Q5LLN2			3.15
I7DMP1	PGA1_c06510,ppdK	866	2.7.9.1	K01006		T			0	Q59754			2.57
I7F1B6	PGA1_c24200	152	3.6.1.-						3.36e-05	Q566C7			0.64
I7F1B6	PGA1_c24200	152	3.6.1.61						3.83e-05	Q75UV1			0.64
I7F1B6	PGA1_c24200	152	3.6.1.60						7.41e-06	Q96G61			0.64
I7F1B6	PGA1_c24200	152	3.6.1.52						7.41e-06	Q96G61			0.64
I7F2T9	PGA1_c30690	1088	3.1.21.3	K01153		T			1.84e-82	O05052			2.48
I7EX84	PGA1_c17270,coaA,coaD	164	2.7.7.3	K00954	WP_014874824	T			1.3e-105	Q1GHM4	bp013958		4.1
I7DP82	PGA1_c11420,eno	424	4.2.1.11	K01689	WP_014879670	T			0	Q1GI52			3.24
I7DP90	PGA1_c11520,puuA1	452	6.3.1.11		WP_014874264	T			1.96e-68	P78061			2.21
I7DP90	PGA1_c11520,puuA1	452	6.3.1.2	K01915					4.25e-57	Q9HNI2			1.65
I7DP90	PGA1_c11520,puuA1	452	6.3.2.-						5.99e-55	Q936T0			0.78
I7DVB5	PGA1_c33780	239	3.5.1.-						9.39e-20	B1M5I5			0.64
I7DVB5	PGA1_c33780	239	2.3.1.12						1.32e-14	P27747			0.64
I7DVB5	PGA1_c33780	239	3.7.1.14						3.73e-14	Q49KF8			0.64
I7DVB5	PGA1_c33780	239	3.7.1.8						6.37e-16	Q59324			0.64
I7DYM2	PGA1_c08420,lcdH	491	1.1.1.108	K17735		T			0	Q5LTH8			2.57
I7E3X7	PGA1_c28180	203	2.7.8.39						0.006	O27726			0.64
I7E3X7	PGA1_c28180	203	2.7.8.34						0.004	Q5JDA9			0.64
I7E3X7	PGA1_c28180	203	2.7.7.74						0.004	Q5JDA9			0.64
I7E3X7	PGA1_c28180	203	2.7.8.41						0.005	Q93YW7			0.64
I7E3X7	PGA1_c28180	203	2.7.8.11						0.008	Q9F7Y9			0.64
I7EKG4	PGA1_c09790,deaD	713	3.6.1.-			T							0.76
I7EKG4	PGA1_c09790,deaD	713	3.6.4.13	K05592					2.17e-79	P44586			1.65
I7DMR9	PGA1_c06820,dppF	321	3.6.3.-						4.05e-93	C0SP98			0.85
I7DMR9	PGA1_c06820,dppF	321	7.4.2.10						1.03e-70	Q6D3A9			0.78
I7F0Q8	PGA1_c21540,pccA	681	6.4.1.3	K01965	WP_014880465	T			0	P05165	bp011501		4.19
I7F0Q8	PGA1_c21540,pccA	681	6.4.1.4						2.18e-174	Q42523			0.94
I7F0P3	PGA1_c21350,parE	652	5.6.2.2	K02622		T			0	P94281			2.57
I7F0P3	PGA1_c21350,parE	652	5.99.1.-		WP_014880446								0.67
I7DNU8	PGA1_c10230,glmS	602	2.6.1.16	K00820	WP_014879575	T			0	P59362			3.24
I7DVJ1	PGA1_c34500,cysQ	265	3.1.3.7	K01082	WP_014881489	T			5.07e-54	P57624			3.08
I7DVJ1	PGA1_c34500,cysQ	265	3.1.3.25						4.21e-21	Q9CNV8			0.73
I7F0I4	PGA1_c30760	370	3.1.-.-						2.29e-05	P03700			0.64
I7F0I4	PGA1_c30760	370	2.7.7.-						2.29e-05	P03700			0.64
I7F2S7	PGA1_c30530	278	2.1.1.63						2.67e-06	P06134			0.64
I7F2S7	PGA1_c30530	278	2.1.1.n11						7.37e-12	P19219			0.64
I7EZW8	PGA1_c28210	223	2.1.1.172						0.002	B7NVD9			0.64
I7EZW8	PGA1_c28210	223	2.3.1.-						0.009	Q5BA83			0.64
I7E3X4	PGA1_c28130	505	7.5.2.11						8.03e-91	A0B297			0.85
I7E3X4	PGA1_c28130	505	7.5.2.7						2.5e-94	Q0TPX5			0.85
I7ERK3	PGA1_c33440	407	1.3.1.114						5.56e-14	B0NAQ4			0.64
I7EZQ2	PGA1_c27450	231	4.1.2.43						3.93e-05	Q46DA4			0.64
I7EZQ2	PGA1_c27450	231	4.1.3.17						4.65e-05	Q9KBI9			0.64
I7EZQ2	PGA1_c27450	231	4.1.1.112						4.65e-05	Q9KBI9			0.64
I7ET55	PGA1_c00860,patB	390	4.4.1.13	K14155	WP_014878874	T			3.07e-98	Q08432			3.15
I7ET55	PGA1_c00860,patB	390	2.6.1.57						2.49e-32	H3ZPU1			0.73
I7ET55	PGA1_c00860,patB	390	2.6.1.1						5.09e-35	Q9V0L2			0.73
I7ETW4	PGA1_c04280,phnK	256	3.6.3.-						1.75e-40	A5VU86			0.73
I7EUH4	PGA1_c06220,topA	900	5.6.2.1	K03168	WP_014879262	T			0	Q1RIM1			3.24
I7ET17	PGA1_262p02320	551	2.2.1.6	K01652					2.71e-54	Q9RQ65			1.65
I7ET17	PGA1_262p02320	551	4.1.1.75						3.1e-86	Q9HUI8			0.85
I7E2Y8	PGA1_c24340,algC	498	5.4.2.2	K15778	WP_014880707	T			3.94e-67	Q88C93			3.08
I7E2Y8	PGA1_c24340,algC	498	5.4.2.8	K15778	WP_014880707	T			3.94e-67	Q88C93			3.08
I7DLF4	PGA1_c02360	442	1.8.1.7	K00383					6.3e-66	P48639			1.65
I7DLF4	PGA1_c02360	442	1.8.1.16						1.29e-65	D0VWY5			0.78
I7EKC6	PGA1_c09380	303	3.1.21.4						1.61e-28	P50187			0.73
I7F3Z9	PGA1_c35490,tsaD	365	2.3.1.234	K01409		T			0	Q1GCQ5			2.57
I7DU90	PGA1_c29910,zntA	726	3.6.3.3	K01534	WP_014881141	T			0	P37617			3.24
I7DU90	PGA1_c29910,zntA	726	7.2.2.12	K01534	WP_014881141	T			0	P37617			3.24
I7DS32	PGA1_c21850	446	3.5.4.28						2.14e-61	A5UMN6			0.78
I7DS32	PGA1_c21850	446	3.5.4.41						2.14e-61	A5UMN6			0.78
I7DS32	PGA1_c21850	446	3.5.4.31						2.14e-61	A5UMN6			0.78
I7DS32	PGA1_c21850	446	3.5.4.4						2.14e-61	A5UMN6			0.78
I7DS32	PGA1_c21850	446	3.5.4.11						2.01e-79	P0CI72			0.78
I7DS32	PGA1_c21850	446	3.5.4.43						1.13e-72	P95442			0.78
I7DS32	PGA1_c21850	446	3.5.4.32						1.07e-113	Q9I6Z0			0.85
I7EW72	PGA1_c03270,moeA1	418	2.10.1.1	K03750		T			4.93e-70	Q56066			2.41
I7EW72	PGA1_c03270,moeA1	418	2.-.-.-		WP_014879023								0.67
I7EW72	PGA1_c03270,moeA1	418	2.7.7.75						2.89e-52	Q39054			0.78
I7DPM5	PGA1_c12990	157	4.2.1.2						0.003	Q9PD25			0.64
I7ERV4	PGA1_c34520,alkB	229	1.14.11.-			T							0.76
I7ERV4	PGA1_c34520,alkB	229	1.14.11.33	K03919					1.31e-58	B8GWW6			1.65
I7ERV4	PGA1_c34520,alkB	229	4.2.99.18						3.7e-10	P0CB42			0.64
I7ERV4	PGA1_c34520,alkB	229	1.14.11.51						3.7e-10	P0CB42			0.64
I7ERV4	PGA1_c34520,alkB	229	2.1.1.-						0.000367	Q65652			0.64
I7ERV4	PGA1_c34520,alkB	229	3.6.4.13						0.000367	Q65652			0.64
I7ERV4	PGA1_c34520,alkB	229	3.4.22.-						0.000367	Q65652			0.64
I7ERV4	PGA1_c34520,alkB	229	2.7.7.48						0.000367	Q65652			0.64
I7EZE4	PGA1_c16200	288	1.2.5.3	K03519					9.07e-37	P19920			1.6
I7EZE4	PGA1_c16200	288	1.17.5.2						9.25e-19	D7REY4			0.64
I7EZE4	PGA1_c16200	288	1.3.7.9						2.36e-20	O33820			0.64
I7EZE4	PGA1_c16200	288	1.5.99.14						2.71e-19	O87681			0.64
I7EZE4	PGA1_c16200	288	1.17.1.5						1.7e-20	Q0QLF4			0.64
I7EZE4	PGA1_c16200	288	1.17.1.4						2.11e-38	Q46800			0.73
I7EZE4	PGA1_c16200	288	1.2.99.8						4.48e-26	Q4J6M6			0.73
I7F037	PGA1_c29100,fadH2	675	1.3.1.34	K00219	WP_014881076	T			0	P42593			3.24
I7F037	PGA1_c29100,fadH2	675	1.16.1.-						1.41e-125	A4J778			0.94
I7F037	PGA1_c29100,fadH2	675	1.5.8.2						2.28e-38	P16099			0.73
I7F037	PGA1_c29100,fadH2	675	1.3.1.115						1.95e-65	P19410			0.78
I7F037	PGA1_c29100,fadH2	675	1.3.1.116						1.02e-70	P32370			0.78
I7F037	PGA1_c29100,fadH2	675	1.5.8.1						5.34e-32	Q48303			0.73
I7F037	PGA1_c29100,fadH2	675	1.6.99.1						1.5e-31	Q5KXG9			0.73
I7ETR6	PGA1_c03630,sucC	397	6.2.1.5	K01903	WP_014879052	T			0	Q28U74	bp014151		4.19
I7F2P9	PGA1_78p00260,lpdA	460	1.8.1.4	K00382	WP_014876556	T			9.01e-164	P31023			3.24
I7F2P9	PGA1_78p00260,lpdA	460	1.6.2.6						6.57e-159	Q9SPB1			0.94
I7DTZ2	PGA1_c28940	652	4.2.2.-	K08309					2.7e-11	O31608			1.51
I7DTZ2	PGA1_c28940	652	4.2.2.n1						1.1e-21	P44888			0.73
I7EK55	PGA1_c08630,recJ	580	3.1.-.-	K07462	WP_014879453	T			3.07e-84	O32044			3.15
I7DTC6	PGA1_c26480,rlmJ	266	2.1.1.266	K07115		T			1.1e-55	P37634			2.41
I7DU27	PGA1_c29290	97	4.2.1.96	K01724		T			2.14e-53	Q16BN1			2.41
I7ESQ7	PGA1_262p00960,tdaC	200	4.1.1.100						2.95e-09	P39638			0.64
I7EWY3	PGA1_c15960	514	3.6.4.12						0.000424	Q60270			0.64
I7F3A6	PGA1_c32230	129	5.3.3.10	K01826					3.13e-16	Q05354			1.51
I7DLD6	PGA1_c02080	250	2.8.1.9						2.09e-06	B3MZN7			0.64
I7DLD6	PGA1_c02080	250	1.-.-.-						0.000725	Q9CW42			0.64
I7E2N1	PGA1_c23300	815	2.1.2.10						4.16e-50	B8D1D7			0.73
I7E2N1	PGA1_c23300	815	1.5.3.19						0	Q8GAI3			0.94
I7E2N1	PGA1_c23300	815	1.5.8.3						0	Q99LB7			0.94
I7E2N1	PGA1_c23300	815	1.5.3.10						1.22e-145	Q9AGP8			0.94
I7E2N1	PGA1_c23300	815	1.5.8.4						5.6e-167	Q9UI17			0.94
I7DQL4	PGA1_c16420	221	3.1.2.-						8.75e-18	Q12354			0.64
I7EVL2	PGA1_c10730,rpiB	151	5.3.1.6	K01808	WP_014879618	T			2.06e-40	P37351			3.03
I7EVL2	PGA1_c10730,rpiB	151	5.3.1.26						2.57e-31	Q4L873			0.73
I7EVL2	PGA1_c10730,rpiB	151	5.3.1.34						6.96e-32	Q6D8V9			0.73
I7DQT4	PGA1_c17310	342	1.14.19.23	K10255					9.95e-10	P48628			1.51
I7DQT4	PGA1_c17310	342	1.14.19.45	K10255					2.96e-90	O34653			1.72
I7DQT4	PGA1_c17310	342	1.14.19.35						2.17e-11	P48622			0.64
I7DQT4	PGA1_c17310	342	1.14.19.13						9.61e-10	Q594P3			0.64
I7DN85	PGA1_c08390	363	2.1.1.n11						0.002	P9WJW3			0.64
I7DN85	PGA1_c08390	363	3.2.2.21						0.002	P9WJW3			0.64
I7EXC0	PGA1_c17720	149	3.4.17.13						0.000102	P0AFV7			0.64
I7ET60	PGA1_78p00320	347	2.1.1.n11						0.008	P9WJW3			0.64
I7ET60	PGA1_78p00320	347	3.2.2.21						0.008	P9WJW3			0.64
I7EYP8	PGA1_c23380	308	2.7.1.82						3.51e-10	O81024			0.64
I7EYP8	PGA1_c23380	308	2.7.1.32						1.05e-07	Q8L518			0.64
I7DM51	PGA1_c04820,cmk	201	2.7.4.25	K00945		T			6.4e-85	A8LSF1			2.48
I7DM51	PGA1_c04820,cmk	201	2.7.4.14		WP_014873583								0.67
I7EUQ0	PGA1_c07140,mauG	417	1.11.1.5	K00428					6.01e-31	P55929			1.6
I7EUQ0	PGA1_c07140,mauG	417	1.7.2.7						6.18e-14	Q1Q0T3			0.64
I7F361	PGA1_c31680,folC	422	6.3.2.12	K11754					7.91e-47	Q05865			1.6
I7F361	PGA1_c31680,folC	422	6.3.2.17	K11754					2.23e-47	P15925			1.6
I7F361	PGA1_c31680,folC	422	2.5.1.15						4.85e-42	D4GW05			0.73
I7F1P1	PGA1_c25640	558	6.5.1.-						0.000401	P03014			0.64
I7F1P1	PGA1_c25640	558	3.1.22.-						0.000401	P03014			0.64
I7F2X1	PGA1_65p00400	218	7.6.2.12	K09689					7.6e-63	P32016			1.65
I7F2X1	PGA1_65p00400	218	7.5.2.4						1.3e-38	Q8CTM4			0.73
I7DN18	PGA1_c07830,argE1	384	3.5.1.16	K01438	WP_014879385	T			4.01e-61	Q31U31			3.08
I7DX55	PGA1_65p00240,rffG	350	4.2.1.46	K01710	WP_014876615	T	fig|391619.35.peg.27		1.93e-160	P27830			4.06
I7E304	PGA1_c24490	134	5.1.99.1	K05606	WP_014875354	T			3.89e-88	Q3IZP4			3.15
I7E304	PGA1_c24490	134	4.4.1.5						4.05e-06	P46235			0.64
I7E109	PGA1_c16880,trpG	193	4.1.3.27	K01658	WP_014880092	T			4.39e-95	P26922			3.15
I7E109	PGA1_c16880,trpG	193	2.6.1.85						7.38e-75	P06193			0.78
I7EW01	PGA1_c02510,frmA	371	1.1.1.284	K00121	WP_014873357	T			0	P72324			3.24
I7EW01	PGA1_c02510,frmA	371	1.1.1.1	K00121					0	P72324			1.81
I7DS61	PGA1_c22150	278	5.4.2.12						0.001	B8CYG0			0.64
I7DS61	PGA1_c22150	278	2.-.-.-						1.96e-05	Q8TEQ8			0.64
I7DTN3	PGA1_c27800,nadB	559	1.4.3.16	K00278	WP_014880969	T			3.74e-163	Q92R32			3.24
I7EXZ1	PGA1_c20330,ispG	373	1.17.7.3	K03526		T			0	Q1GIC1			2.57
I7EXZ1	PGA1_c20330,ispG	373	1.17.7.1	K03526	WP_014880366								1.54
I7EZH6	PGA1_c26540,mrdB,rodA	379	2.4.1.129			T			2.33e-89	P44468			1.61
I7F3T1	PGA1_c34540,dnaJ	387	1.8.4.-						6.92e-17	Q5R5L3			0.64
I7F3T1	PGA1_c34540,dnaJ	387	7.1.1.-						6.11e-05	Q9SMS0			0.64
I7F1M0	PGA1_c35110,mnmE,trmE	430	3.6.-.-	K03650	WP_014881536	T			0	Q1GCM0			3.24
I7DU32	PGA1_c29350,aprD	576	7.4.2.5						1.54e-54	Q933I3			0.78
I7ETT9	PGA1_c03980	138	2.3.1.266	K03789					4.25e-15	P0A944			1.51
I7ETT9	PGA1_c03980	138	2.3.1.255						2.27e-08	I6YG32			0.64
I7ETT9	PGA1_c03980	138	2.3.1.258						2.27e-08	I6YG32			0.64
I7ETT9	PGA1_c03980	138	2.3.1.57						2.23e-05	P21340			0.64
I7DXZ7	PGA1_c05740,pcs	231	2.7.8.24	K01004	WP_014879222	T			4.79e-63	D0B707			3.08
I7E4Z8	PGA1_c32400,msrP	306	1.8.5.-			T			4.42e-167	Q5LNE0			1.7
I7E4Z8	PGA1_c32400,msrP	306	1.8.-.-	K07147									0.87
I7EKS3	PGA1_c10840,radA	454	3.6.4.-						0	Q2YMH5			0.94
I7ERR6	PGA1_c34170,dxs	642	2.2.1.7	K01662	WP_014881462	T			0	Q1GCG4			3.24
I7DUE7	PGA1_c30540,accA	320	2.1.3.15	K01962		T			0	Q5LME7			2.57
I7DUE7	PGA1_c30540,accA	320	6.4.1.2	K01962	WP_014875930								1.54
I7EJX0	PGA1_c07640	430	2.5.1.49	K01740					1.5e-141	O13326			1.81
I7EJX0	PGA1_c07640	430	2.5.1.47						6.89e-120	Q92441			0.85
I7E3X1	PGA1_c28080	176	2.3.1.189						5.25e-06	B2GI63			0.64
I7E3X1	PGA1_c28080	176	2.3.1.255						2.98e-08	I6YG32			0.64
I7E3X1	PGA1_c28080	176	2.3.1.258						2.98e-08	I6YG32			0.64
I7E3X1	PGA1_c28080	176	2.3.1.266						7.01e-07	O05517			0.64
I7E3X1	PGA1_c28080	176	2.3.1.57						9.89e-11	P21340			0.64
I7E3X1	PGA1_c28080	176	2.3.1.80						9.29e-05	Q9QXT3			0.64
I7EUG7	PGA1_c06120	410	2.7.10.2						0.001	Q9AHD2			0.64
I7EUG7	PGA1_c06120	410	3.6.-.-						0.005	Q9K5N0			0.64
I7DLK1	PGA1_c02930	636	1.97.1.12						6.58e-11	Q7NFT5			0.64
I7DTL2	PGA1_c27590	241	1.1.1.320						1.81e-12	P40580			0.64
I7DTL2	PGA1_c27590	241	2.8.4.4						6.1e-08	Q0BNJ1			0.64
I7EX61	PGA1_c16960,gltX1,gltX	466	6.1.1.17	K01885	WP_014880100	T			0	Q1GHK0			3.24
I7EYD7	PGA1_c12020,fadJ	733	1.1.1.35	K01782	WP_014879717	T			4.66e-125	A8A2L0			3.24
I7EYD7	PGA1_c12020,fadJ	733	4.2.1.17	K01782	WP_014879717	T			4.66e-125	A8A2L0			3.24
I7EYD7	PGA1_c12020,fadJ	733	5.1.2.3	K01782					4.66e-125	A8A2L0			1.81
I7F1Y0	PGA1_c26470,leuA	523	2.3.3.13	K01649	WP_014875547	T			0	Q212A9	bp013624		4.19
I7EQ88	PGA1_c27920,murQ	313	4.2.-.-		WP_014880981	T							1.43
I7EQ88	PGA1_c27920,murQ	313	4.2.1.126	K07106					2.74e-48	B1WPP6			1.6
I7DVF3	PGA1_c34150,xseB	85	3.1.11.6	K03602	WP_014876300	T			9.55e-44	Q1GCG2			3.03
I7DL70	PGA1_c01200	89	2.7.1.121						8.41e-09	D4GL26			0.64
I7DL70	PGA1_c01200	89	2.7.3.9						4.31e-06	P45597			0.64
I7DLE5	PGA1_c02190	462	2.7.13.3		WP_014878944	T			1.29e-18	Q8Z332			2.07
I7DLE5	PGA1_c02190	462	3.1.3.-						3.16e-14	P0A2D9			0.64
I7EWY0	PGA1_c15910	262	3.6.3.-						1.4e-37	P45073			0.73
I7EWY0	PGA1_c15910	262	7.6.2.11						1.27e-30	Q1GIE5			0.73
I7EWY0	PGA1_c15910	262	7.5.2.7						7.05e-31	Q8ENB3			0.73
I7EWY0	PGA1_c15910	262	7.3.2.3						5.63e-31	Q8Z0H0			0.73
I7DRL0	PGA1_c20220,ilvH	186	2.2.1.6	K01653	WP_014875024	T			9.93e-46	O28555			3.03
I7E477	PGA1_c29320	152	3.5.99.10						0.000382	A0A1J1DL12			0.64
I7DX20	PGA1_c02550,pcaG	214	1.13.11.3	K00448	WP_014878970	T			5.03e-73	P20371			3.08
I7DX20	PGA1_c02550,pcaG	214	1.13.11.1						5.24e-06	P07773			0.64
I7DX20	PGA1_c02550,pcaG	214	1.13.11.37						0.000496	Q6F4M7			0.64
I7DR67	PGA1_c18700,nnrD,nnrE	565	4.2.1.136			T			4.41e-58	O67377			1.54
I7DR67	PGA1_c18700,nnrD,nnrE	565	5.1.99.6			T			4.41e-58	O67377			1.54
I7DMM7	PGA1_c06260,ctaB	313	2.5.1.141	K02257		T			0	Q1GE49			2.57
I7DMM7	PGA1_c06260,ctaB	313	2.5.1.-		WP_014873723								0.67
I7EX52	PGA1_c07070	175	2.3.1.-						9.72e-12	P05332			0.64
I7EX52	PGA1_c07070	175	6.3.5.2						1.32e-14	Q7VG78			0.64
I7EK32	PGA1_c08360	133	2.8.1.1						2.44e-05	A8GKU1			0.64
I7EK32	PGA1_c08360	133	2.7.7.-						1.7e-05	P9WMN7			0.64
I7EQM0	PGA1_c29620	250	2.7.8.8	K17103					7.33e-37	Q9ZBM2			1.6
I7EQM0	PGA1_c29620	250	2.7.8.38						1.28e-11	O27106			0.64
I7EWT1	PGA1_c05650,truA	257	5.4.99.12	K06173	WP_014879213	T			1.01e-166	Q1GE00			3.24
I7EYU4	PGA1_c23870,nthB	238	4.2.1.84	K20807	WP_014880670	T			9.88e-34	P97052			3.03
I7EYU4	PGA1_c23870,nthB	238	3.5.5.8						0.004	O66187			0.64
I7F0Z5	PGA1_c32640	633	2.7.13.3						1.28e-28	P0DOA0			0.73
I7DN02	PGA1_c07680	202	2.3.1.184						2.98e-16	P74945			0.64
I7DN02	PGA1_c07680	202	2.3.1.228						1.68e-08	Q89VI2			0.64
I7EZG6	PGA1_c16510	247	2.4.-.-						5.06e-06	Q68X33			0.64
I7DP06	PGA1_c10480,nuoH	345	7.1.1.-			T			0	Q5LPS7			1.7
I7DP06	PGA1_c10480,nuoH	345	7.1.1.2	K00337					0	Q5LPS7			1.81
I7DP06	PGA1_c10480,nuoH	345	1.6.5.11		WP_014874162								0.67
I7EZ82	PGA1_c25550,mttB3	491	2.1.1.-			T							0.76
I7EZ82	PGA1_c25550,mttB3	491	2.1.1.250	K14083					1.18e-53	Q24MI3			1.65
I7DX14	PGA1_78p00450	288	4.2.1.118	K15652					2.19e-75	Q81RQ4			1.65
I7DX14	PGA1_78p00450	288	4.2.1.44						9.6e-07	C1EVJ4			0.64
I7DVN5	PGA1_c34900,ilvA	408	4.3.1.19	K01754	WP_014881518	T			3.99e-114	Q9KC63			3.15
I7DZL5	PGA1_c11750,putA	1158	1.5.5.2	K13821		T			0	O52485			2.57
I7DZL5	PGA1_c11750,putA	1158	1.2.1.88	K13821		T			0	O52485			2.57
I7E0A8	PGA1_c14460	296	4.1.1.65	K01613					3.93e-74	A8MJ83			1.65
I7E248	PGA1_c20940,phaZ	424	3.1.1.-		WP_014880411	T							1.43
I7E248	PGA1_c20940,phaZ	424	3.1.1.75	K05973									0.87
I7E5N0	PGA1_c35080,parA	266	1.18.6.1						4.62e-07	P08625			0.64
I7E5N0	PGA1_c35080,parA	266	2.7.10.2						1.66e-07	P0C0T9			0.64
I7E5N0	PGA1_c35080,parA	266	3.6.-.-						5.5e-88	Q9K5N0			0.85
I7EL27	PGA1_c12060	383	1.3.1.95						9.52e-69	G3KIM8			0.78
I7EL27	PGA1_c12060	383	1.3.99.-						5.65e-76	P45857			0.78
I7EL27	PGA1_c12060	383	1.3.8.8						2.14e-109	P79274			0.85
I7EL27	PGA1_c12060	383	1.3.8.4						1.52e-68	Q75IM9			0.78
I7EL27	PGA1_c12060	383	1.3.99.12						6.09e-69	Q9FS88			0.78
I7F1G9	PGA1_c34610	132	3.6.1.55	K03574					1.06e-19	P32090			1.51
I7F1G9	PGA1_c34610	132	3.6.1.65						1.67e-21	P77788			0.73
I7DML3	PGA1_c06060	168	3.4.23.43	K02278									0.87
I7EVW5	PGA1_c11990	542	6.2.1.-	K00666	WP_014879714	T			0	F4HUK6			3.24
I7EVW5	PGA1_c11990	542	6.2.1.2						1.08e-179	Q8VZF1			0.94
I7EVW5	PGA1_c11990	542	6.2.1.1						1.08e-179	Q8VZF1			0.94
I7EVW5	PGA1_c11990	542	6.2.1.25						1.97e-148	Q9SS01			0.94
I7EXI8	PGA1_c08650,hom	428	1.1.1.3	K00003	WP_014879454	T			1.39e-94	P29365			3.15
I7F2V5	PGA1_65p00250,rfbC	211	5.1.3.13	K01790		T	fig|391619.35.peg.28		3.21e-58	P26394	bp013484		4.18
I7EY95	PGA1_c11510,puuB	436	1.4.3.-	K09471		T			7.67e-105	P37906			2.48
I7EY95	PGA1_c11510,puuB	436	1.5.3.1						1.09e-10	Q52671			0.64
I7EY95	PGA1_c11510,puuB	436	1.5.8.4						1.9e-06	Q63342			0.64
I7EY95	PGA1_c11510,puuB	436	1.4.3.19						2.33e-16	S5FMM4			0.64
I7ENN9	PGA1_c21820	187	6.3.3.2	K01934		T			2.28e-16	P44905			2.27
I7EY42	PGA1_c10810,purF	488	2.4.2.14	K00764		T			4.18e-175	P77935			2.57
I7F0E1	PGA1_c30220	334	3.6.1.22	K03426					9.25e-58	Q29RH3			1.65
I7F1N1	PGA1_c25530	361	2.1.1.n11						6.9e-06	P9WJW3			0.64
I7F1N1	PGA1_c25530	361	3.2.2.21						6.9e-06	P9WJW3			0.64
I7F1Y5	PGA1_c26570	308	1.1.1.79	K12972					1.92e-52	B4TSP5			1.65
I7F1Y5	PGA1_c26570	308	1.1.1.81	K12972					1.92e-52	B4TSP5			1.65
I7EIT9	PGA1_c03250,mobB	163	5.3.1.16						0.009	Q12NS9			0.64
I7E2L9	PGA1_c23150,acoB	331	1.1.1.-	K21417	WP_014880610	T			3.77e-102	O34591			3.15
I7E2L9	PGA1_c23150,acoB	331	1.2.4.1						2.28e-101	Q86HX0			0.85
I7F4H0	PGA1_262p00530	325	5.6.2.1	K03168					5.34e-32	Q7T6X9			1.6
I7F3X2	PGA1_c35090,rsmG	204	2.1.1.170	K03501		T			7.52e-82	Q1GCL8			2.48
I7F3X2	PGA1_c35090,rsmG	204	2.1.1.-		WP_014881534								0.67
I7DXB6	PGA1_c03650,mdh	320	1.1.1.37	K00024	WP_014873467	T			0	Q5LXE1			3.24
I7EY07	PGA1_c20570,tgt	376	2.4.2.29	K00773	WP_014880384	T			0	Q1GIL3			3.24
I7F2B9	PGA1_262p01050	307	4.6.1.1						3.9e-12	P0DKX7			0.64
I7F2B9	PGA1_262p01050	307	3.4.24.40						4.21e-10	P16316			0.64
I7F2B9	PGA1_262p01050	307	5.1.3.37						6.59e-10	Q44496			0.64
I7F2B9	PGA1_262p01050	307	4.2.2.3						1.52e-09	Q9ZFG9			0.64
I7E5M5	PGA1_c35030,rph	237	2.7.7.56	K00989	WP_014881529	T			9.4e-164	Q1GCL2			3.24
I7E661	PGA1_262p00220	391	5.5.1.27						3.8e-26	A9CEQ8			0.73
I7E661	PGA1_262p00220	391	4.2.1.140						2.04e-21	Q6L1T2			0.73
I7E661	PGA1_262p00220	391	4.2.1.6						2.04e-21	Q6L1T2			0.73
I7E661	PGA1_262p00220	391	4.2.1.39						6.51e-23	Q704D2			0.73
I7E661	PGA1_262p00220	391	4.2.1.42						1.61e-20	Q8ZL58			0.64
I7E661	PGA1_262p00220	391	4.2.1.156						1.61e-20	Q8ZL58			0.64
I7E661	PGA1_262p00220	391	4.2.1.5						1.64e-35	Q97U96			0.73
I7F2G4	PGA1_262p01610	416	3.6.3.-						1.71e-09	A1K323			0.64
I7DZE4	PGA1_c10890,dnaB	506	3.6.4.12	K02314		T			4.29e-155	Q68WJ2			2.57
I7DZE4	PGA1_c10890,dnaB	506	3.6.1.-		WP_014879628								0.67
I7EWS3	PGA1_c05530	330	3.5.3.26	K14977					2.33e-28	Q8GXV5			1.6
I7EXX2	PGA1_c10070	123	4.1.1.44	K01607					8.39e-08	P20370			1.51
I7EYA1	PGA1_c21660,betA	551	1.1.99.1	K00108	WP_014875166	T			0	Q8G1Z8			3.24
I7EYA1	PGA1_c21660,betA	551	1.2.1.8						0	Q8G1Z8			0.94
I7DMH5	PGA1_c05610,queD	117	4.-.-.-			T							0.76
I7DMH5	PGA1_c05610,queD	117	4.2.3.12	K01737									0.87
I7DMH5	PGA1_c05610,queD	117	4.1.2.50	K01737					6.96e-16	O29809			1.51
I7DTH2	PGA1_c27080	271	2.7.-.-						0.00031	P06628			0.64
I7DTH2	PGA1_c27080	271	3.1.1.61						0.002	Q9UYF3			0.64
I7DTH2	PGA1_c27080	271	3.5.1.44						0.002	Q9UYF3			0.64
I7DTC0	PGA1_c26430,gltX2,gltX	441	6.1.1.17	K01885	WP_014880858	T			0	Q1GEA9			3.24
I7F3K2	PGA1_c33560	470	4.6.1.1	K01768					2.4e-41	P40137			1.6
I7F3K2	PGA1_c33560	470	4.6.1.2						2.1e-13	Q07553			0.64
I7EZJ3	PGA1_c26690	227	2.5.1.18	K00799					6.81e-08	P57113			1.51
I7EZJ3	PGA1_c26690	227	5.2.1.2						2e-12	Q18938			0.64
I7EZJ3	PGA1_c26690	227	1.8.5.1						0.001	Q9Z339			0.64
I7EZJ3	PGA1_c26690	227	1.20.4.2						0.001	Q9Z339			0.64
I7E6C6	PGA1_262p01230,norC	150	1.9.3.1						1.39e-05	Q04441			0.64
I7EQ46	PGA1_c27260	239	2.7.13.3						6.1e-10	Q52977			0.64
I7EQ46	PGA1_c27260	239	3.1.3.-						6.1e-10	Q52977			0.64
I7EV35	PGA1_c08760,soxA1	973	1.5.3.1	K00302	WP_014879464	T			0	O87386			3.24
I7EV35	PGA1_c08760,soxA1	973	2.1.2.10						3.3e-27	Q8CXD9			0.73
I7DT24	PGA1_c25540,dmgdH2	811	1.5.8.4	K00315	WP_014880788	T			1.8e-155	Q63342			3.24
I7DT24	PGA1_c25540,dmgdH2	811	2.1.2.10						1.84e-28	A4FLG1			0.73
I7DT24	PGA1_c25540,dmgdH2	811	1.5.8.3						3.61e-112	Q64380			0.85
I7DT24	PGA1_c25540,dmgdH2	811	1.5.3.19						1.25e-90	Q8GAI3			0.85
I7DT24	PGA1_c25540,dmgdH2	811	1.5.3.10						1.84e-84	Q9AGP8			0.85
I7ETZ9	PGA1_c04630	364	1.13.12.16	K00459					1.91e-120	D0V3Y4			1.72
I7DPH5	PGA1_c12490	416	3.6.4.10						4.38e-12	P29844			0.64
I7ELN6	PGA1_c14400,hisl,hisI	125	3.5.4.19	K01496	WP_014879912	T			1.44e-73	Q1GGT9			3.08
I7EYT4	PGA1_c23770,tdcG	457	4.3.1.17	K01752	WP_014880662	T			5.66e-155	O86564			3.24
I7E4C4	PGA1_c29830,leuB	367	1.1.1.85	K00052	WP_014875864	T			0	Q5LWZ5			3.24
I7DNJ2	PGA1_c09420,pyc	1188	6.4.1.1	K01958		T			0	Q9KWU4			2.57
I7DTN8	PGA1_c27850	334	2.4.-.-	K20534		T							1.63
I7DTN8	PGA1_c27850	334	2.4.1.-						1.66e-68	O22007			0.78
I7EZ24	PGA1_c14690	380	3.5.1.47						1.44e-45	B1YJ90			0.73
I7EZ24	PGA1_c14690	380	3.5.1.32						1.74e-34	P45493			0.73
I7F547	PGA1_65p00330	598	3.4.22.-						1.5e-45	P0DKX6			0.73
I7F547	PGA1_65p00330	598	7.6.2.2						1.81e-43	P21447			0.73
I7F547	PGA1_65p00330	598	7.6.2.1						1.81e-43	P21447			0.73
I7F547	PGA1_65p00330	598	7.5.2.6						3.34e-44	Q21NS8			0.73
I7F547	PGA1_65p00330	598	7.4.2.5						8.96e-44	Q93FH0			0.73
I7EMY5	PGA1_c19410	788	1.2.4.1	K00163		T			1.02e-38	Q8NNF6			2.36
I7EXW7	PGA1_c10020	153	2.1.1.-						3.48e-08	P29940			0.64
I7F0F0	PGA1_c20310	462	3.4.24.-						6.81e-05	P25894			0.64
I7F103	PGA1_c32740,mutL	650	3.1.-.-						7.4e-31	F1NQJ3			0.73
I7EX29	PGA1_c06810,dppD1	326	3.6.3.-						2.07e-89	Q8VQK6			0.85
I7DP86	PGA1_c11470	149	2.3.1.-						0.001	Q6D8U7			0.64
I7DVE8	PGA1_c34100,ohr	142	1.11.1.15						4.75e-06	P0C0L3			0.64
I7EMJ7	PGA1_c17930,fabG	245	1.1.1.100	K00059	WP_014880178	T			5.8e-96	Q9KQH7			3.15
I7ELH0	PGA1_c13740,lcfB1	533	6.2.1.3		WP_014879858	T			8.47e-74	O07610			2.21
I7ELH0	PGA1_c13740,lcfB1	533	5.1.1.11						4.97e-52	P09095			0.78
I7ELH0	PGA1_c13740,lcfB1	533	6.2.1.26						2.64e-58	Q5KVX9			0.78
I7ELH0	PGA1_c13740,lcfB1	533	1.-.-.-						8.6e-52	Q70LM4			0.78
I7ELH0	PGA1_c13740,lcfB1	533	6.2.1.12						4.34e-51	Q9LU36			0.78
I7ELH0	PGA1_c13740,lcfB1	533	6.2.1.8						5.39e-53	Q9SMT7			0.78
I7E4Z3	PGA1_c32220,hpcC	503	1.2.1.-		WP_014881315	T					bp003361		2.38
I7E4Z3	PGA1_c32220,hpcC	503	1.2.1.60	K00151							bp003361		1.82
I7E4Z3	PGA1_c32220,hpcC	503	1.2.1.3						1.08e-114	P0C6D7	bp003361		1.8
I7E4Z3	PGA1_c32220,hpcC	503	1.2.1.85						4.23e-114	P19059	bp003361		1.8
I7E4Z3	PGA1_c32220,hpcC	503	1.2.1.5						3.95e-114	P46367	bp003361		1.8
I7E4Z3	PGA1_c32220,hpcC	503	1.2.1.32						2.37e-118	Q66I21	bp003361		1.8
I7EP14	PGA1_c23440	538	6.2.1.32	K08295					3.45e-72	C0SPB0			1.65
I7EP14	PGA1_c23440	538	6.2.1.1						4.57e-59	P39062			0.78
I7EP14	PGA1_c23440	538	6.2.1.27						9.18e-64	Q53005			0.78
I7EP14	PGA1_c23440	538	6.2.1.2						1.44e-59	Q6SKG1			0.78
I7EP14	PGA1_c23440	538	6.2.1.17						1.44e-59	Q6SKG1			0.78
I7EP14	PGA1_c23440	538	6.2.1.25						1.27e-88	Q8GQN9			0.85
I7EP14	PGA1_c23440	538	6.2.1.37						6.88e-59	Q9AJS8			0.78
I7EKZ2	PGA1_c11640	145	2.3.3.14						2.42e-05	C3MPM7			0.64
I7EQH3	PGA1_c29010	235	2.7.1.-						0.003	P46321			0.64
I7F0Z9	PGA1_c32690	350	1.5.1.7	K00290					2.39e-94	Q09694			1.72
I7F0Z9	PGA1_c32690	350	1.5.1.9						5.55e-12	A2VCW9			0.64
I7F0Z9	PGA1_c32690	350	1.5.1.8						5.55e-12	A2VCW9			0.64
I7DQL8	PGA1_c16470,cysS	465	6.1.1.16	K01883	WP_014880059	T			0	Q1GHI0			3.24
I7F0S4	PGA1_c21790	556	1.3.99.-						0	A0R4H4			0.94
I7F0S4	PGA1_c21790	556	1.3.1.6						5.52e-06	O13755			0.64
I7F0S4	PGA1_c21790	556	1.3.99.4						0.000137	Q7D5C1			0.64
I7F0S4	PGA1_c21790	556	1.3.99.33						3.97e-05	Q8CVD0			0.64
I7F0S4	PGA1_c21790	556	1.3.5.4						5.3e-05	Q9Z4P0			0.64
I7EPD4	PGA1_c24690	112	6.1.1.10						1.07e-17	B2RHF5			0.64
I7DX95	PGA1_c03450,argH	456	4.3.2.1	K01755	WP_014879038	T			0	Q169X5			3.24
I7EVE5	PGA1_c10240,glmU	451	2.7.7.23	K04042	WP_014879576	T			0	Q1GIQ5			3.24
I7EVE5	PGA1_c10240,glmU	451	2.3.1.157	K04042	WP_014879576	T			0	Q1GIQ5			3.24
I7F2D2	PGA1_c28730	259	3.5.1.118						1.05e-18	A0R5M9			0.64
I7F2D2	PGA1_c28730	259	2.4.2.-						3.22e-35	P54004			0.73
I7E188	PGA1_c17990,dmlA	354	1.1.1.83	K07246	WP_014880183	T			3.18e-144	P76251			3.24
I7E188	PGA1_c17990,dmlA	354	1.1.1.93	K07246					1.14e-140	Q51945			1.81
I7E188	PGA1_c17990,dmlA	354	4.1.1.73	K07246					1.14e-140	Q51945			1.81
I7E188	PGA1_c17990,dmlA	354	1.1.1.85						4.04e-94	Q47SB4			0.85
I7DZH9	PGA1_c11300	184	2.3.1.79	K00661					3.29e-48	P77791			1.6
I7EN79	PGA1_c20290,amiC	436	3.5.1.28	K01448					7.36e-43	P63883			1.6
I7EVF8	PGA1_c00060	197	1.6.5.2						1.35e-07	P05982			0.64
I7EVF8	PGA1_c00060	197	1.6.99.-						1.15e-08	P45245			0.64
I7EVF8	PGA1_c00060	197	1.7.1.17						2.49e-05	Q4KGG0			0.64
I7EVF8	PGA1_c00060	197	1.10.5.1						1.95e-09	Q6AY80			0.64
I7F017	PGA1_c18890,ccmA	206	7.6.2.5	K02193		T			2.8e-88	Q5LR15			2.48
I7DNZ3	PGA1_c10380,nuoB	174	7.1.1.-			T			9.82e-129	Q1GIP1			1.7
I7DNZ3	PGA1_c10380,nuoB	174	7.1.1.2	K00331					9.82e-129	Q1GIP1			1.81
I7DP27	PGA1_c10670	375	7.2.2.7	K02010					1.88e-79	Q6D2F6			1.65
I7DP27	PGA1_c10670	375	7.6.2.11						4.7e-73	Q0AGF4			0.78
I7DQ27	PGA1_c14750	168	3.1.3.27	K01095		T			2.1e-21	P44157			2.36
I7DP36	PGA1_c10770,surE	260	3.1.3.5	K03787	WP_014879621	T			2.94e-142	Q1GFP2			3.24
I7ERZ6	PGA1_c34970,msrA2,msrA	221	1.8.4.11	K07304		T			2.99e-55	Q9A9E9			2.41
I7ERZ6	PGA1_c34970,msrA2,msrA	221	1.8.4.12						1.73e-51	Q9KLX6			0.78
I7F1V9	PGA1_c36020	204	3.1.13.5	K03684					3.68e-25	A9H9B7			1.6
I7F1V9	PGA1_c36020	204	2.7.7.7						3.06e-15	O67779			0.64
I7DRY7	PGA1_c21210	142	4.4.1.5	K01759					1.93e-23	Q9KT93			1.6
I7EU98	PGA1_c05300	405	2.4.1.346						7.98e-17	A0R043			0.64
I7EU98	PGA1_c05300	405	2.4.1.301						1.76e-16	Q65CC7			0.64
I7EMS2	PGA1_c18770	418	3.1.1.93						0.002	Q5I0K5			0.64
I7E1T5	PGA1_c20200	214	3.1.1.61						8.63e-17	Q12YX1			0.64
I7E1T5	PGA1_c20200	214	3.5.1.44						8.63e-17	Q12YX1			0.64
I7EP73	PGA1_c24030	217	2.1.1.77	K00573					4.37e-29	Q2LUT4			1.6
I7EQU3	PGA1_c30460,dat	286	2.6.1.21	K00824	WP_014881177	T			1.2e-64	P99090			3.08
I7F0Y9	PGA1_c22760,alkK1	534	6.2.1.-	K00666	WP_014880571	T							2.3
I7F0Y9	PGA1_c22760,alkK1	534	6.2.1.2						3.13e-58	A4YDR9			0.78
I7F0Y9	PGA1_c22760,alkK1	534	6.2.1.17						3.13e-58	A4YDR9			0.78
I7F0Y9	PGA1_c22760,alkK1	534	6.2.1.1						3.13e-58	A4YDR9			0.78
I7F0Y9	PGA1_c22760,alkK1	534	6.2.1.40						3.13e-58	A4YDR9			0.78
I7F0Y9	PGA1_c22760,alkK1	534	6.2.1.44						4.76e-92	Q5LRT0			0.85
I7F0Y9	PGA1_c22760,alkK1	534	6.2.1.3						5.42e-102	Q5SKN9			0.85
I7F0Y9	PGA1_c22760,alkK1	534	6.2.1.25						5.62e-54	Q9SS01			0.78
I7F4I4	PGA1_262p00730	363	2.7.11.1						7.89e-11	P42411			0.64
I7F4I4	PGA1_262p00730	363	2.7.13.3						1.33e-14	P9WGL5			0.64
I7ELL5	PGA1_c14200,miaA	290	2.5.1.75	K00791	WP_014879899	T			1.33e-138	Q1GGR8			3.24
I7EZ64	PGA1_c15200	698	7.2.1.1						0.001	A6VW13			0.64
I7EXZ6	PGA1_c20420	193	3.1.3.85						1.64e-13	A1TC01			0.64
I7EXZ6	PGA1_c20420	193	3.1.3.3						1.55e-14	F4KI56			0.64
I7EXZ6	PGA1_c20420	193	3.1.3.73						2.28e-12	P52086			0.64
I7EXZ6	PGA1_c20420	193	5.4.2.11						1.98e-11	Q6ADH3			0.64
I7EXZ6	PGA1_c20420	193	3.1.3.63						1.13e-14	W5EP13			0.64
I7DZ40	PGA1_c10160	388	3.5.1.47						1.55e-72	C5D827			0.78
I7DZ40	PGA1_c10160	388	3.5.1.32						1.26e-87	P45493			0.85
I7DZ40	PGA1_c10160	388	3.4.17.-						3.06e-78	P58156			0.78
I7ELU6	PGA1_c15020,bdhA	257	1.1.1.30	K00019	WP_014879959	T			7.82e-96	O86034	bp000282		4.1
I7ELU6	PGA1_c15020,bdhA	257	1.1.1.385						6.3e-46	P39640			0.73
I7ELU6	PGA1_c15020,bdhA	257	1.1.1.127						7.14e-43	P50842			0.73
I7ELU6	PGA1_c15020,bdhA	257	1.1.1.100						5.98e-42	P51831			0.73
I7DPZ3	PGA1_c14330,lpxB	393	2.4.1.182	K00748	WP_014879906	T			0	Q5LSU1			3.24
I7DXK5	PGA1_c04550	363	1.1.1.306						6.06e-69	P80094	bp013311		1.73
I7DXK5	PGA1_c04550	363	1.1.99.36						1.18e-60	P80175	bp013311		1.73
I7DXK5	PGA1_c04550	363	1.1.1.284						1.14e-56	P93629	bp013311		1.73
I7DXK5	PGA1_c04550	363	1.1.1.1						5.09e-59	P9WQC7	bp013311		1.73
I7DXK5	PGA1_c04550	363	4.1.2.46								bp013311		0.95
I7EJS2	PGA1_c07050	211	2.1.1.201						6.15e-10	A6WYI0			0.64
I7EJS2	PGA1_c07050	211	2.1.1.163						6.15e-10	A6WYI0			0.64
I7EU27	PGA1_c04930,trpA	263	4.2.1.20	K01695	WP_014879154	T			1.02e-172	Q5LV87			3.24
I7F2E3	PGA1_262p01360	313	7.3.2.2						0.005	Q2IN45			0.64
I7DYG7	PGA1_c07710	168	4.1.1.79	K06034					3.28e-37	Q6M060			1.6
I7DYG7	PGA1_c07710	168	4.1.1.82						3e-06	Q54271			0.64
I7ENU4	PGA1_c22630	756	2.7.13.3						2.52e-24	P23545			0.73
I7DSH3	PGA1_c23320	266	3.1.3.11						4.28e-24	O67791			0.73
I7DSH3	PGA1_c23320	266	3.1.3.94						9.88e-26	P29219			0.73
I7DSH3	PGA1_c23320	266	3.1.3.25						8.64e-50	Q6NPM8			0.73
I7DSH3	PGA1_c23320	266	3.1.3.93						8.64e-50	Q6NPM8			0.73
I7DSH3	PGA1_c23320	266	3.1.3.15						8.64e-50	Q6NPM8			0.73
I7EZT8	PGA1_c27910	300	2.7.1.8	K18676					9.7e-25	Q9KUA9			1.6
I7EZT8	PGA1_c27910	300	2.7.1.59						0.000118	Q97ML3			0.64
I7EWE9	PGA1_c14040,dmgdH1	805	1.5.8.4	K00315	WP_014879886	T			0	Q9DBT9			3.24
I7EWE9	PGA1_c14040,dmgdH1	805	2.1.2.10						1.48e-45	B2A2T4			0.73
I7EWE9	PGA1_c14040,dmgdH1	805	1.5.8.3						4.34e-121	Q64380			0.94
I7EWE9	PGA1_c14040,dmgdH1	805	1.5.3.19						9.29e-96	Q8GAI3			0.85
I7EWE9	PGA1_c14040,dmgdH1	805	1.5.3.10						3.65e-92	Q9AGP8			0.85
I7E424	PGA1_c28820,xsc	591	2.3.3.15	K03852	WP_014881051	T			0	A3SR25	bp004346		4.19
I7E424	PGA1_c28820,xsc	591	2.2.1.6						2.43e-66	Q57725			0.78
I7E424	PGA1_c28820,xsc	591	1.2.-.-								bp004340		0.95
I7E424	PGA1_c28820,xsc	591	4.1.1.47								bp004340		0.95
I7E5D6	PGA1_c34130,petR	233	4.6.1.1						1.79e-11	P40138			0.64
I7E5D6	PGA1_c34130,petR	233	2.7.13.3						1.13e-11	P48027			0.64
I7E5D6	PGA1_c34130,petR	233	2.7.7.65						3.86e-13	Q9A5I5			0.64
I7E5D6	PGA1_c34130,petR	233	3.1.4.-						3.05e-10	Q9WY30			0.64
I7EM51	PGA1_c15920	276	3.6.3.-						2.26e-41	P45073			0.73
I7EM51	PGA1_c15920	276	7.3.2.3						1.41e-29	Q5YZY9			0.73
I7ENQ1	PGA1_c21970,gatA	495	6.3.5.7	K02433		T			0	Q1GFB5			2.57
I7ENQ1	PGA1_c21970,gatA	495	6.3.5.6	K02433									0.87
I7ENQ1	PGA1_c21970,gatA	495	6.3.5.-		WP_014880496								0.67
I7DZM6	PGA1_c11910,dme	762	1.1.1.39		WP_014879707	T			0	O30807			2.37
I7DZM6	PGA1_c11910,dme	762	1.1.1.40	K00029					0	P76558			1.81
I7DZM6	PGA1_c11910,dme	762	1.1.1.38						2.21e-122	O34962			0.94
I7EXJ9	PGA1_c08750,soxB1	417	1.5.3.1	K00303	WP_014879462	T			0	O87388			3.24
I7EXJ9	PGA1_c08750,soxB1	417	1.5.8.4						1.27e-20	Q63342			0.64
I7EXJ9	PGA1_c08750,soxB1	417	1.5.8.3						2.48e-19	Q9UL12			0.64
I7E6X7	PGA1_65p00270	739	3.2.1.-						1.41e-09	O33680			0.64
I7E6X7	PGA1_65p00270	739	4.6.1.1						5.68e-17	P0DKX7			0.64
I7E6X7	PGA1_65p00270	739	3.4.24.40						3.63e-08	P23694			0.64
I7E6X7	PGA1_65p00270	739	5.1.3.37						1.58e-20	Q44496			0.64
I7E6X7	PGA1_65p00270	739	4.2.2.3						2.94e-17	Q9ZFG9			0.64
I7DUC9	PGA1_c30320	221	4.6.1.19	K01166					2.31e-12	P42814			1.51
I7DUC9	PGA1_c30320	221	4.6.1.21						6.6e-09	P21338			0.64
I7DUC9	PGA1_c30320	221	3.1.26.1						4.14e-08	P81477			0.64
I7DUC9	PGA1_c30320	221	3.1.27.-						7.2e-23	Q07465			0.73
I7EKL0	PGA1_c10250	221	3.1.3.18	K01091					8.67e-33	Q98ML8			1.6
I7F543	PGA1_65p00280	418	3.1.3.16						0.003	Q6ZVD8			0.64
I7F280	PGA1_262p00500	518	6.5.1.1	K10747					1.67e-63	Q1II25			1.65
I7F280	PGA1_262p00500	518	6.5.1.6	K10747					4.86e-38	Q9HH07			1.6
I7F280	PGA1_262p00500	518	6.5.1.7	K10747									0.87
I7EQC0	PGA1_c28320	255	7.3.2.4						1.76e-50	P73265			0.73
I7EQC0	PGA1_c28320	255	7.6.2.7						3.81e-47	Q28K97			0.73
I7EQC0	PGA1_c28320	255	3.6.3.-						1.37e-49	Q576E0			0.73
I7ESD0	PGA1_c36210	333	3.5.1.1			T							0.76
I7EVL9	PGA1_c00940	199	2.1.1.64						0.003	B3H0C8			0.64
I7EVL9	PGA1_c00940	199	2.1.1.222						0.003	B3H0C8			0.64
I7EVL9	PGA1_c00940	199	2.1.1.301						0.000853	E5KIC0			0.64
I7EVL9	PGA1_c00940	199	2.1.1.265						0.000228	P25397			0.64
I7EVL9	PGA1_c00940	199	2.1.1.163						0.000167	Q9JPD1			0.64
I7EVL9	PGA1_c00940	199	2.1.1.201						0.000167	Q9JPD1			0.64
I7EVL9	PGA1_c00940	199	2.1.1.144						0.000704	Q9RX93			0.64
I7EVY5	PGA1_c02300	258	2.4.1.293						1.24e-08	Q0P9C6			0.64
I7EVY5	PGA1_c02300	258	2.4.1.226						1.5e-09	Q9CMP0			0.64
I7EVY5	PGA1_c02300	258	2.4.1.175						1.5e-09	Q9CMP0			0.64
I7EVY5	PGA1_c02300	258	2.4.1.83						1.64e-07	Q9WU83			0.64
I7F1U8	PGA1_c35920	295	2.7.1.89						6.77e-06	Q31ZG3			0.64
I7F2P5	PGA1_78p00210	377	3.2.1.-						2.02e-09	A8H2K3			0.64
I7F2P5	PGA1_78p00210	377	1.-.-.-						1.05e-12	O13991			0.64
I7F2P5	PGA1_78p00210	377	1.1.1.292						3.71e-09	Q2I8V6			0.64
I7F2P5	PGA1_78p00210	377	1.1.1.48						7.3e-10	Q53TZ2			0.64
I7F2P5	PGA1_78p00210	377	1.1.1.120						7.3e-10	Q53TZ2			0.64
I7F2P5	PGA1_78p00210	377	1.1.1.376						7.3e-10	Q53TZ2			0.64
I7F2P5	PGA1_78p00210	377	1.1.1.369						3.76e-10	Q88S38			0.64
I7F2P5	PGA1_78p00210	377	1.1.1.179						9.01e-09	Q8GAK6			0.64
I7F2P5	PGA1_78p00210	377	1.1.1.18						1.01e-10	Q8XZZ9			0.64
I7F2P5	PGA1_78p00210	377	1.1.1.384						9.07e-10	Q9ZA33			0.64
I7EP59	PGA1_c23880,nthA	232	4.2.1.84	K01721		T			1.22e-88	P97051			2.48
I7EP59	PGA1_c23880,nthA	232	3.5.5.8						1.82e-41	O66188			0.73
I7EZ31	PGA1_c24880	382	3.6.1.63	K06162					4.09e-33	P16689			1.6
I7EZ31	PGA1_c24880	382	3.5.2.3						0.005	B2KCN5			0.64
I7DYP2	PGA1_c08640,glpX	327	3.1.3.11	K11532	WP_014873972				2.06e-89	C1AM93	bp007050		3.34
I7DYP2	PGA1_c08640,glpX	327	3.1.3.37	K11532									0.87
I7EI82	PGA1_c00550	213	1.13.11.79	K04719					4.16e-73	Q2RNG5			1.65
I7EI82	PGA1_c00550	213	1.6.99.3						1.01e-05	Q60049			0.64
I7EI82	PGA1_c00550	213	6.3.2.31						5.14e-06	Q75UN0			0.64
I7EI82	PGA1_c00550	213	6.3.2.34						5.14e-06	Q75UN0			0.64
I7EI82	PGA1_c00550	213	1.3.8.-						5.14e-06	Q75UN0			0.64
I7F3Y7	PGA1_c35340	332	2.7.1.221	K07102					3.11e-59	Q9A2M2			1.65
I7DNL1	PGA1_c09570	147	2.7.1.161						3.45e-07	Q5UY62			0.64
I7DRU3	PGA1_c20710	394	1.14.-.-		WP_014880393	T			1.8e-68	O31785			2.21
I7DRU3	PGA1_c20710	394	1.14.15.33						3.39e-61	O87605			0.78
I7DRU3	PGA1_c20710	394	1.14.14.46						5.98e-57	P53554			0.78
I7EYN3	PGA1_c23180	292	2.3.1.12	K00627					1.04e-76	Q59098			1.65
I7DMU9	PGA1_c07180	321	1.1.1.31	K00020					2.54e-31	Q9V8M5			1.6
I7DMU9	PGA1_c07180	321	1.1.1.60						1.33e-31	P0ABQ2			0.73
I7DMU9	PGA1_c07180	321	1.1.1.291						1.71e-38	Q0QLF5			0.73
I7DMU9	PGA1_c07180	321	1.1.1.n11						1.17e-27	Q9LSV0			0.73
I7DMU9	PGA1_c07180	321	1.1.1.79						1.17e-27	Q9LSV0			0.73
I7EW12	PGA1_c02610,livG	255	7.3.2.3						1.96e-37	P14788			0.73
I7EW12	PGA1_c02610,livG	255	7.6.2.11						2.14e-37	Q14Q07			0.73
I7EY62	PGA1_c21170,folA	158	1.5.1.3	K00287	WP_014880432	T			6.21e-29	P04174			3.03
I7F1N3	PGA1_c35210	351	4.2.2.-	K08304									0.87
I7F1N3	PGA1_c35210	351	4.2.2.n1						9.07e-34	Q9KPQ4			0.73
I7DZX5	PGA1_c13290,rnd	385	3.1.13.5	K03684		T			0	Q28RA7			2.57
I7E0A2	PGA1_c14410	291	6.1.1.-	K01894					1.97e-120	O68142			1.72
I7E699	PGA1_262p00770	414	4.2.2.n1						1.18e-20	P41052			0.64
I7ESN0	PGA1_262p00660	273	3.4.21.92						0.003	Q1Q8J2			0.64
I7DYD6	PGA1_c07360,dgoK	325	2.7.1.58	K00883	WP_014879346	T			1.03e-55	Q92RN7			3.08
I7E2E6	PGA1_c22180,fadD1	631	6.2.1.3		WP_014880516	T			7.72e-71	P94547			2.21
I7E2E6	PGA1_c22180,fadD1	631	6.2.1.-	K00666					1.19e-60	O31826			1.65
I7E2J8	PGA1_c22850,virB	788	7.4.2.8	K03199									0.87
I7E572	PGA1_c33450	205	4.2.1.116						5.21e-27	A4YI89			0.73
I7E572	PGA1_c33450	205	4.2.1.150						5.49e-20	P52046			0.64
I7E572	PGA1_c33450	205	4.2.1.17						6.91e-20	Q50130			0.64
I7E572	PGA1_c33450	205	7.2.4.3						6.52e-22	Q5R4W0			0.73
I7E572	PGA1_c33450	205	4.1.1.94						6.52e-22	Q5R4W0			0.73
I7ESH0	PGA1_262p00010	434	3.6.-.-						2.54e-17	P37522			0.64
I7EW77	PGA1_c03320	549	1.5.5.1	K00311	WP_014879027	T			0	Q9HZP5			3.24
I7EWC9	PGA1_c03860	463	2.3.1.15	K00631					2.38e-30	Q1I610			1.6
I7F022	PGA1_c18950	431	2.7.11.1						0.000422	P74297			0.64
I7EQE5	PGA1_c28710	347	3.5.1.54						4.47e-07	P32528			0.64
I7EQE5	PGA1_c28710	347	6.3.4.6						2.14e-13	P38095			0.64
I7EQE5	PGA1_c28710	347	3.5.2.9						4.28e-29	P44298			0.73
I7EYU7	PGA1_c13810	387	1.3.8.4						3.19e-53	P12007			0.78
I7EYU7	PGA1_c13810	387	1.3.8.8						8.4e-72	P28330			0.78
I7E400	PGA1_c28480	1044	2.7.13.3						2.53e-56	Q881J7			0.78
I7DZS3	PGA1_c12520,clpP	210	3.4.21.92	K01358	WP_014879759	T			2.1e-146	Q1GGF6			3.24
I7E2I0	PGA1_c22640	249	4.99.1.3						0.002	Q12X56			0.64
I7E2I0	PGA1_c22640	249	4.99.1.11						0.002	Q12X56			0.64
I7EXG6	PGA1_c08380,tas	347	1.-.-.-						9.76e-39	O05408			0.73
I7EXG6	PGA1_c08380,tas	347	1.1.1.-						2.73e-33	P46336			0.73
I7DUX0	PGA1_c32190,hpcG	266	4.2.-.-		WP_014881312	T			5.13e-42	P23149	bp013649		3.11
I7DUX0	PGA1_c32190,hpcG	266	4.2.1.-	K02509					5.13e-42	P23149	bp013649		2.55
I7DUX0	PGA1_c32190,hpcG	266	4.2.1.163						2.93e-81	P42270	bp013649		1.8
I7DUX0	PGA1_c32190,hpcG	266	4.1.1.77						6.23e-42	P49155	bp013649		1.68
I7DUX0	PGA1_c32190,hpcG	266	4.2.1.80						4.27e-56	Q706S1	bp013649		1.73
I7DUX0	PGA1_c32190,hpcG	266	4.2.1.132						2.53e-47	Q83VZ5	bp013649		1.68
I7E5E9	PGA1_c34280,msrB	149	1.8.4.12	K07305	WP_014876313	T			9.77e-79	P65448	bp010372		4.03
I7EUC9	PGA1_c05670	184	2.3.1.-						5.27e-06	P09163			0.64
I7DPJ2	PGA1_c12640	251	3.6.3.-						7e-33	P45073			0.73
I7DPJ2	PGA1_c12640	251	7.5.2.7						1.34e-32	Q2K9A3			0.73
I7DPJ2	PGA1_c12640	251	7.5.2.11						9.94e-33	Q2NUD6			0.73
I7DPJ2	PGA1_c12640	251	7.6.2.11						2.03e-32	Q7NQN5			0.73
I7DPJ2	PGA1_c12640	251	7.3.2.3						1.39e-32	Q9MUN1			0.73
I7DUZ2	PGA1_c32530	288	3.6.-.-						1.7e-21	P24203			0.73
I7EKP5	PGA1_c10500	139	4.1.1.44	K01607					7.92e-06	P20370			1.51
I7E4W9	PGA1_c31820	335	3.6.3.-	K03924									0.87
I7E4W9	PGA1_c31820	335	3.6.4.12						0.000875	A2BZ00			0.64
I7DZP4	PGA1_c12170	525	3.1.3.5	K11751					3.56e-107	P29240			1.72
I7DZP4	PGA1_c12170	525	3.6.1.45	K11751					2.14e-101	P52307			1.72
I7DZP4	PGA1_c12170	525	3.6.1.5						1.25e-93	B3A0N5			0.85
I7DZP4	PGA1_c12170	525	3.1.4.16						3.89e-90	O34313			0.85
I7DZP4	PGA1_c12170	525	3.1.3.6						3.89e-90	O34313			0.85
I7DYY9	PGA1_c09600,ftsw	422	2.4.1.129						1.78e-90	B8H092			0.85
I7EJA4	PGA1_c05110	319	3.5.4.22	K21062									0.87
I7EJA4	PGA1_c05110	319	4.3.3.7						8.19e-21	Q12ZG2			0.73
I7EJA4	PGA1_c05110	319	4.1.3.16						1.18e-15	Q9DCU9			0.64
I7EYI0	PGA1_c12480,soxD2	349	1.8.2.6	K22622									0.87
I7EYI0	PGA1_c12480,soxD2	349	1.8.2.2						1.55e-05	A4VND8			0.64
I7EZR3	PGA1_c27600	656	2.7.13.3						1.67e-30	P14377			0.73
I7F074	PGA1_c29510	272	2.8.2.-						0.000428	Q76EC5			0.64
I7DWU4	PGA1_262p02200,modC	363	7.3.2.5	K02017		T			2.77e-116	Q98KI3			2.48
I7E473	PGA1_c29270,thcD	403	1.18.1.-		WP_014881092	T							1.43
I7E473	PGA1_c29270,thcD	403	1.18.1.3	K00529					2.71e-105	Q5S3I2			1.72
I7E473	PGA1_c29270,thcD	403	1.18.1.2						1.03e-98	D5IGG6			0.85
I7E473	PGA1_c29270,thcD	403	1.14.13.-						1.33e-87	G2ITT5			0.85
I7E473	PGA1_c29270,thcD	403	1.18.1.5						2.35e-90	P16640			0.85
I7E473	PGA1_c29270,thcD	403	1.18.1.1						5e-71	Q9L4M8			0.78
I7DUV0	PGA1_c31940,mepA	307	3.4.24.-	K07261	WP_014873228	T			3.17e-57	P44566			3.08
I7EP98	PGA1_c24330,kdsA	277	2.5.1.55	K01627	WP_014880706	T			1.28e-132	Q0BTX5			3.24
I7ERI7	PGA1_c33180	390	2.3.1.9	K00626	WP_014881390	T			3.77e-120	P45359	bp002775		4.1
I7F0W3	PGA1_c32150,pncA	201	3.5.1.-	K08281	WP_014881309	T			1.91e-06	O32091			2.94
I7F0W3	PGA1_c32150,pncA	201	3.5.1.19	K08281	WP_014881309	T			1.13e-49	P21369			3.03
I7DM07	PGA1_c04370	344	2.4.1.345						1.68e-08	P9WMZ5			0.64
I7DM07	PGA1_c04370	344	2.4.1.283						1.16e-08	Q4H4F8			0.64
I7DM07	PGA1_c04370	344	2.4.1.301						1.66e-10	Q65CC7			0.64
I7DM07	PGA1_c04370	344	2.4.1.250						5.61e-10	Q82G92			0.64
I7EI92	PGA1_c00720,atpE	74	7.1.2.2						0.005	P14571			0.64
I7EZF4	PGA1_c26240,lysS	547	6.1.1.6	K04566		T			0	Q16AV0			2.57
I7DX72	PGA1_65p00390,glf	387	5.4.99.9	K01854		T	fig|391619.35.peg.42		0	Q48485			3.39
I7DX72	PGA1_65p00390,glf	387	5.4.99.59						4.43e-152	Q6E7F1			0.94
I7DX72	PGA1_65p00390,glf	387	1.5.3.16						1.72e-05	Q8H191			0.64
I7DX72	PGA1_65p00390,glf	387	1.4.3.2						1.66e-05	Q96RQ9			0.64
I7F0R1	PGA1_c31400,hpcH	256	4.1.2.-		WP_014881253	T							1.43
I7F0R1	PGA1_c31400,hpcH	256	4.1.2.52	K02510					7.5e-87	B5FR34			1.72
I7F0R1	PGA1_c31400,hpcH	256	4.1.3.39						1.38e-86	O05151			0.85
I7DQN7	PGA1_c16740	947	3.1.4.52						2.11e-47	P77334			0.73
I7DNA8	PGA1_c08590	195	4.6.1.2						8.49e-09	O02298			0.64
I7EYI4	PGA1_c12530,clpX	422	3.4.24.-						6.33e-05	D1C4U5			0.64
I7EYI4	PGA1_c12530,clpX	422	3.4.21.-						6.52e-05	Q5UPT0			0.64
I7EYI4	PGA1_c12530,clpX	422	3.6.4.12						0.000182	Q6FYP6			0.64
I7EYI4	PGA1_c12530,clpX	422	3.6.1.3						0.000133	Q7ZZ25			0.64
I7EYI4	PGA1_c12530,clpX	422	5.6.1.1						0.000114	Q8MNV0			0.64
I7EXN3	PGA1_c09120,bioB	325	2.8.1.6	K01012	WP_014874017	T			1.52e-173	A1B656			3.24
I7ERB9	PGA1_c32160	304	2.8.1.1						0.000149	Q88QT9			0.64
I7ERH1	PGA1_c32950,truB	301	5.4.99.25	K03177		T			0	Q1GKJ9			2.57
I7ERH1	PGA1_c32950,truB	301	5.4.99.-		WP_014881367								0.67
I7ESW5	PGA1_262p01770	113	1.-.-.-						1.18e-09	B1M5I6			0.64
I7ESW5	PGA1_262p01770	113	3.5.99.10						4.3e-13	Q8U308			0.64
I7EK14	PGA1_c08160	392	1.14.13.83	K02229					7.3e-21	P21637			1.6
I7EK14	PGA1_c08160	392	1.7.7.1						1.77e-15	Q51879			0.64
I7EK14	PGA1_c08160	392	1.8.1.2						0.000459	Q5WKE7			0.64
I7EUE4	PGA1_c05870,ruvB	349	3.6.4.12	K03551		T			0	Q1GE13			2.57
I7EX46	PGA1_c16810,fabI2	272	1.3.1.9	K00208	WP_014874781	T			9.54e-149	P58380			3.24
I7EX46	PGA1_c16810,fabI2	272	1.3.1.10	K00208									0.87
I7F1I9	PGA1_c25010,ltaE	344	4.1.2.48	K01620		T			9.79e-77	O50584			2.41
I7F1I9	PGA1_c25010,ltaE	344	4.1.2.5		WP_014880752				4.77e-05	D7PHZ0			1.31
I7F1I9	PGA1_c25010,ltaE	344	4.1.2.49						4.12e-05	O07051			0.64
I7F1I9	PGA1_c25010,ltaE	344	2.6.1.-						0.001	Q795J3			0.64
I7F1I9	PGA1_c25010,ltaE	344	5.1.1.1						0.00077	Q9UW18			0.64
I7EL87	PGA1_c12910	439	7.1.1.-						0.002	B1KJV5			0.64
I7ELJ0	PGA1_c13940	374	3.6.1.-						6.75e-21	A8GHJ1			0.73
I7ELJ0	PGA1_c13940	374	3.6.1.13						2.36e-31	P83844			0.73
I7F0S9	PGA1_c31650	306	1.5.1.49						9.84e-84	A1B196	bp014858		1.8
I7F0S9	PGA1_c31650	306	1.5.1.25						7.16e-37	Q9QYU4	bp014858		1.68
I7DX86	PGA1_c03360	255	2.1.1.297						2.96e-09	A6H162			0.64
I7DX86	PGA1_c03360	255	2.1.1.223						1.11e-09	P44702			0.64
I7ETV6	PGA1_c04180,phnC	272	7.3.2.2	K02041	WP_014879094	T			3.44e-178	Q1GKZ0			3.24
I7EZ60	PGA1_c15140,gyrA	908	5.6.2.2	K02469		T			0	Q92IZ6			2.57
I7F007	PGA1_c28750	440	2.6.1.-		WP_014881045	T			4.39e-82	O53379			2.28
I7F007	PGA1_c28750	440	2.6.1.96						1.44e-81	Q84P52			0.85
I7DVA0	PGA1_c33620	538	4.6.1.1	K01768					7.7e-17	P43524			1.51
I7DLQ1	PGA1_c03420	309	1.3.-.-						2.03e-65	P9WNZ9			0.78
I7DLQ1	PGA1_c03420	309	1.14.99.38						3.61e-05	Q5PRC0			0.64
I7DLQ1	PGA1_c03420	309	1.14.16.5						1.73e-50	Q6ZNB7			0.73
I7DYX3	PGA1_c09450,uvrD	787	3.6.4.12	K03657		T			0	Q68WT1			2.57
I7DYX3	PGA1_c09450,uvrD	787	3.6.1.-		WP_014879513								0.67
I7ER68	PGA1_c31510,cynT	216	4.2.1.1	K01673	WP_014873270	T			2.71e-34	Q9ZUC2			3.03
I7F2I7	PGA1_c29390	758	3.4.16.4						1.19e-70	P70997			0.78
I7F2I7	PGA1_c29390	758	2.4.1.129						1.19e-70	P70997			0.78
I7DWL4	PGA1_c00780,sMC,smc	1151	3.6.3.-						0.003	Q31GF5			0.64
I7EI86	PGA1_c00620	181	6.3.5.2						3.86e-16	Q7VG78			0.64
I7EI86	PGA1_c00620	181	2.3.1.-						2.94e-14	Q9HX72			0.64
I7EVC0	PGA1_c09990	132	1.1.1.330						0.000775	Q7RYE5			0.64
I7F2J3	PGA1_c29490,livD,ilvD	614	4.2.1.9	K01687	WP_014881105	T			0	Q5LN98			3.24
I7EJP7	PGA1_c06730	640	3.3.2.10						0.005	I6YGS0			0.64
I7EJP7	PGA1_c06730	640	3.1.1.10						0.004	P07383			0.64
I7ETP6	PGA1_c03340,ispE	278	2.7.1.148	K00919		T			1.76e-100	Q5LX98			2.48
I7DQ93	PGA1_c15360	347	2.8.1.7	K04487					4.02e-57	P12623			1.65
I7DQP1	PGA1_c16800,pdxH	201	1.4.3.5	K00275	WP_014880086	T			1.91e-118	Q1GHI5			3.15
I7EKE5	PGA1_c09590,yhiN	393	1.3.1.114						4.03e-33	B0NAQ4			0.73
I7DQE6	PGA1_c15470,rplU	196	4.2.1.-						0.000744	Q9P7D4			0.64
I7ETK1	PGA1_c02740,ugpC1,ugpC	348	7.6.2.10	K05816	WP_014878987	T			4.3e-173	Q28QL7			3.24
I7EWY8	PGA1_c16010	544	2.-.-.-						1.59e-44	P22525			0.73
I7F3X9	PGA1_c35240,hslU	436	3.4.24.-						9.75e-06	Q5SI82			0.64
I7F3X9	PGA1_c35240,hslU	436	3.6.1.3						0.00018	Q9WTT2			0.64
I7DPD2	PGA1_c12030,fadA2	403	2.3.1.16		WP_014879718	T			2.9e-82	P21151			2.28
I7DPD2	PGA1_c12030,fadA2	403	2.3.1.9	K00626					1.36e-156	O53871			1.81
I7EL48	PGA1_c12460,soxB2	565	3.1.6.20	K17224									0.87
I7EL48	PGA1_c12460,soxB2	565	3.1.3.-						2.57e-21	A9BJC1			0.73
I7EL48	PGA1_c12460,soxB2	565	3.6.1.5						2.18e-11	B3A0N5			0.64
I7EL48	PGA1_c12460,soxB2	565	3.1.4.16						1.54e-13	O34313			0.64
I7EL48	PGA1_c12460,soxB2	565	3.1.3.6						1.54e-13	O34313			0.64
I7EL48	PGA1_c12460,soxB2	565	3.1.3.5						8.8e-17	Q05927			0.64
I7EUY5	PGA1_c08150,cobH	209	5.4.99.61	K06042	WP_014879412	T			5.66e-81	P21638			3.15
I7EUY5	PGA1_c08150,cobH	209	5.4.99.60	K06042					2.78e-27	Q8EXP7			1.6
I7F1L8	PGA1_c25320	505	5.2.1.13	K09835					2.07e-34	Q9M9Y8			1.6
I7F1L8	PGA1_c25320	505	1.3.99.31						1.62e-21	P21685			0.73
I7F1L8	PGA1_c25320	505	1.14.99.44						7.37e-25	Q4VKU9			0.73
I7F1L8	PGA1_c25320	505	1.3.8.2						1.21e-22	Q4VKV1			0.73
I7F1L8	PGA1_c25320	505	1.3.99.23						2.39e-27	Q5BLE8			0.73
I7F0N5	PGA1_c21250,aatA	400	2.6.1.-			T							0.76
I7F0N5	PGA1_c21250,aatA	400	2.6.1.1	K00812	WP_014880437				0	Q02635			2.48
I7DPG0	PGA1_c12340	406	2.8.3.20						7.63e-69	A9WGE3			0.78
I7DPG0	PGA1_c12340	406	2.8.3.19						2.56e-76	P76518			0.78
I7DPG0	PGA1_c12340	406	2.8.3.22						2.78e-62	Q1KLK0			0.78
I7DPG0	PGA1_c12340	406	2.8.3.13						5.49e-89	Q7TNE1			0.85
I7DYC2	PGA1_c07210,idhA	328	1.1.1.18	K00010	WP_014879335	T			5.71e-104	O68965	bp009115		4.1
I7DYC2	PGA1_c07210,idhA	328	1.1.1.369	K00010					5.19e-91	O05389			1.72
I7DYC2	PGA1_c07210,idhA	328	1.1.1.370						5.92e-56	P40332			0.78
I7ERL0	PGA1_c33540,mutY	357	3.2.2.31	K03575		T			3.62e-68	P17802			2.41
I7ERL0	PGA1_c33540,mutY	357	3.2.2.-		WP_014881416								0.67
I7ESP4	PGA1_262p00810,tdaF	189	4.1.1.29						2.8e-08	A0A2I9			0.64
I7ESP4	PGA1_262p00810,tdaF	189	6.3.2.5						1.16e-12	P73881			0.64
I7ESP4	PGA1_262p00810,tdaF	189	4.1.1.36						1.16e-12	P73881			0.64
I7F389	PGA1_c32030,glpK	494	2.7.1.30	K00864	WP_014881298	T			0	Q5LWR1	bp002126		4.19
I7EJ00	PGA1_c03890,raiI	213	2.3.1.184	K20249		T			4.57e-25	O54451			2.36
I7EJ00	PGA1_c03890,raiI	213	2.3.1.228						3.66e-10	Q89VI2			0.64
I7DSK1	PGA1_c23610,purD	421	6.3.4.13	K01945	WP_014880649	T			2.88e-178	Q986A5			3.24
I7DQP4	PGA1_c16850	613	5.2.1.8	K03770					9.7e-22	P0ADY1			1.6
I7ET68	PGA1_c01010,spoT	710	3.1.7.2		WP_014876063	T			9.62e-175	P0AG26			2.37
I7ET68	PGA1_c01010,spoT	710	2.7.6.5						0	Q8YG65			0.94
I7EWS6	PGA1_c05600,queC	232	6.3.4.20	K06920		T			2.92e-134	Q1GEY7			2.57
I7EWS6	PGA1_c05600,queC	232	3.5.-.-		WP_014879208								0.67
I7DX64	PGA1_c03060,pyrB	331	2.1.3.2	K00609	WP_014879007	T			0	Q5LX75	bp012663		4.19
I7DTB5	PGA1_c26380	238	3.6.3.-						1.59e-65	Q1BHS6			0.78
I7DWB9	PGA1_262p00540,gabD	459	1.2.1.16	K00135	WP_014881685	T			3.83e-125	P76149			3.24
I7DWB9	PGA1_262p00540,gabD	459	1.2.1.79	K00135					7.93e-122	A0QMB9			1.81
I7DWB9	PGA1_262p00540,gabD	459	1.2.1.20	K00135									0.87
I7E6T1	PGA1_78p00430	434	6.2.1.-	K00666					3.66e-25	Q5HRH4			1.6
I7E6T1	PGA1_78p00430	434	6.2.1.26						6.09e-26	Q9CHK3			0.73
I7EUF4	PGA1_c05970,ftsH	637	3.4.24.-	K03798	WP_014873694	T			0	A1URA3			3.24
I7EYK0	PGA1_c12730	149	3.-.-.-						3.92e-13	Q8UAA9			0.64
I7F1J4	PGA1_c25060	125	4.-.-.-						0.000142	O14034			0.64
I7F2N8	PGA1_c30050,ccoI	726	7.2.2.9	K01533									0.87
I7F2N8	PGA1_c30050,ccoI	726	3.6.3.-						0	O33533			0.94
I7F2N8	PGA1_c30050,ccoI	726	7.2.2.8						6.1e-116	P73241			0.85
I7DVL4	PGA1_c34700	276	3.5.1.128	K11206					9.91e-67	P0DP68			1.65
I7DVL4	PGA1_c34700	276	3.6.1.29						1.21e-53	O76463			0.78
I7E053	PGA1_c14010,xylB	478	2.7.1.17	K00854	WP_014879883	T			1.08e-134	P09099			3.24
I7E1F5	PGA1_c18780,purB	434	4.3.2.2	K01756	WP_014880249	T			4.01e-167	P12047	bp012595		4.19
I7E2W8	PGA1_c24140	146	3.1.3.48	K01104					7.49e-38	Q55535			1.6
I7E2W8	PGA1_c24140	146	3.1.3.2						1.08e-25	P41893			0.73
I7EL73	PGA1_c12760,blh	287	3.-.-.-		WP_014879777	T							1.43
I7EL73	PGA1_c12760,blh	287	3.1.2.6						4.6e-17	B8ICA2			0.64
I7EL73	PGA1_c12760,blh	287	1.13.11.18						2.96e-26	Q3T094			0.73
I7EMI7	PGA1_c17830	205	3.4.-.-						0.009	P85500			0.64
I7EPL5	PGA1_c25430	508	3.1.6.6						1.53e-27	O69787			0.73
I7EPL5	PGA1_c25430	508	3.1.6.13						1.41e-21	P22304			0.73
I7EPL5	PGA1_c25430	508	3.1.4.-						4.14e-42	Q1M964			0.73
I7EPL5	PGA1_c25430	508	3.1.3.-						4.14e-42	Q1M964			0.73
I7EPL5	PGA1_c25430	508	3.1.6.1						9.73e-45	Q8XNV1			0.73
I7ESX8	PGA1_262p01920	407	1.16.1.-						4.18e-24	A4J778			0.73
I7ESX8	PGA1_262p01920	407	1.3.1.-						1.66e-25	G9F1Y9			0.73
I7ESX8	PGA1_262p01920	407	1.3.1.116						5.65e-28	P32370			0.73
I7ESX8	PGA1_262p01920	407	1.6.99.1						4.92e-26	Q9KCT8			0.73
I7DYL7	PGA1_c08370	133	2.8.1.-						1.55e-09	D3RPB9			0.64
I7DYL7	PGA1_c08370	133	2.8.1.1						3.25e-05	Q08742			0.64
I7E5Q3	PGA1_c35330	224	2.7.7.99	K00992					7.23e-37	Q9A2M1			1.6
I7E5Q3	PGA1_c35330	224	2.7.7.13						2.87e-14	A2VD83			0.64
I7EM02	PGA1_c15430,sufS	406	2.8.1.7	K11717	WP_014879986	T			3.34e-142	Q9PDA6			3.24
I7EM02	PGA1_c15430,sufS	406	4.4.1.16	K11717	WP_014879986				1.85e-128	Q6D625			2.48
I7EM43	PGA1_c15810	385	4.4.1.13						2.37e-73	O31632			0.78
I7EM43	PGA1_c15810	385	4.4.1.1						3.12e-69	P18757			0.78
I7EM43	PGA1_c15810	385	2.5.1.-						1.49e-67	P55218			0.78
I7EM43	PGA1_c15810	385	4.4.1.2						9.94e-71	Q8L0X4			0.78
I7EM43	PGA1_c15810	385	4.4.1.11						9.94e-71	Q8L0X4			0.78
I7EM43	PGA1_c15810	385	4.4.1.28						6.01e-68	Q8RDT4			0.78
I7ENZ9	PGA1_c23290	293	2.7.1.82						2.73e-17	Q869T9			0.64
I7ENZ9	PGA1_c23290	293	2.7.1.32						3.68e-09	Q9M9H6			0.64
I7F0A6	PGA1_c19850,pdxA	325	1.1.1.262	K00097	WP_014880335	T			4.14e-154	Q1GI38			3.24
I7DTV9	PGA1_c28550	396	2.1.1.222						0.002	B0SW81			0.64
I7DTV9	PGA1_c28550	396	2.1.1.64						0.001	Q63159			0.64
I7DTV9	PGA1_c28550	396	2.1.1.114						0.001	Q63159			0.64
I7EYJ2	PGA1_c12630	251	3.6.3.-						1.77e-31	P45073			0.73
I7EYJ2	PGA1_c12630	251	7.6.2.11						4.76e-26	Q7VNG4			0.73
I7EVV6	PGA1_c11890	480	3.5.1.4	K01426					7.38e-45	K9NBS6			1.6
I7EVV6	PGA1_c11890	480	6.3.5.7						3.7e-44	C1D1L2			0.73
I7EVV6	PGA1_c11890	480	3.5.1.14						7.38e-45	K9NBS6			0.73
I7EVV6	PGA1_c11890	480	3.5.1.13						7.38e-45	K9NBS6			0.73
I7F3W4	PGA1_c34990,tme	751	1.1.1.40	K00029	WP_014881526	T			0	O30808	bp009844		4.19
I7F3W4	PGA1_c34990,tme	751	1.1.1.39						0	O30807	bp009844		1.89
I7F3W4	PGA1_c34990,tme	751	1.1.1.38						1e-133	O34962	bp009844		1.89
I7EZY7	PGA1_c28460	366	3.4.13.-						5.72e-49	O31689			0.73
I7EZY7	PGA1_c28460	366	3.4.13.9						1.94e-52	P81535			0.78
I7DUH3	PGA1_c30850,cpdA	284	3.1.4.53	K03651		T			1.34e-70	Q6NDI4			2.41
I7EXF2	PGA1_c18150	422	3.4.24.40						2.32e-09	P16317			0.64
I7EXF2	PGA1_c18150	422	5.1.3.37						5.13e-09	Q44495			0.64
I7EXF2	PGA1_c18150	422	4.6.1.1						1.72e-09	Q57506			0.64
I7DL65	PGA1_c01150,chvI	233	4.6.1.1						1.91e-16	P40138			0.64
I7DL65	PGA1_c01150,chvI	233	3.1.1.61						8.93e-12	Q2INJ8			0.64
I7DL65	PGA1_c01150,chvI	233	3.5.1.44						8.93e-12	Q2INJ8			0.64
I7DL65	PGA1_c01150,chvI	233	2.7.13.3						4.54e-11	Q54SP4			0.64
I7DL65	PGA1_c01150,chvI	233	2.7.7.65						1.04e-14	Q9A5I5			0.64
I7DL65	PGA1_c01150,chvI	233	3.1.4.-						2.5e-13	Q9KSB1			0.64
I7F3J8	PGA1_c33510,lpxK	334	2.7.1.130	K00912	WP_014881414	T			6.85e-163	Q1GD92			3.24
I7F4I9	PGA1_262p00780	369	1.1.1.219						7.96e-15	P51106			0.64
I7F4I9	PGA1_262p00780	369	1.1.1.234						7.96e-15	P51106			0.64
I7F4I9	PGA1_262p00780	369	1.3.1.-						3.9e-13	Q5XLY0			0.64
I7F4I9	PGA1_262p00780	369	1.2.1.44						8.86e-18	Q6K9A2			0.64
I7EX19	PGA1_c16430	222	3.2.2.21	K01247					3.94e-22	Q92383			1.6
I7EX19	PGA1_c16430	222	2.1.1.n11						2.04e-07	P9WJW3			0.64
I7ETJ8	PGA1_c02690	969	3.4.24.40						0.000216	P82115			0.64
I7ETJ8	PGA1_c02690	969	5.1.3.37						1.6e-15	Q44495			0.64
I7ETJ8	PGA1_c02690	969	4.6.1.1						2.02e-21	Q57506			0.73
I7ETJ8	PGA1_c02690	969	4.2.2.3						4.29e-10	Q9ZFG9			0.64
I7F0B3	PGA1_c29920	366	5.1.99.4		WP_014881142	T			6.24e-81	P70473			2.28
I7F0B3	PGA1_c29920	366	2.8.3.19						1.31e-34	A9X6P9			0.73
I7F0B3	PGA1_c29920	366	5.1.1.17						5.75e-61	Q8J0F0			0.78
I7F0B3	PGA1_c29920	366	2.8.3.13						2.92e-30	Q9HAC7			0.73
I7F4Z7	PGA1_78p00290,gcvT	365	2.1.2.10	K00605	WP_014876559	T			1.62e-107	Q54DD3			3.15
I7DRP5	PGA1_c20610	403	3.6.-.-						5.79e-24	P24203			0.73
I7EXP6	PGA1_c19230,dusA	334	1.3.1.91			T			5.99e-130	Q9KUX9			1.7
I7EXP6	PGA1_c19230,dusA	334	1.-.-.-	K05539									0.87
I7DXA4	PGA1_c03550,lpd2	465	1.8.1.4	K00382	WP_014879045	T			0	P95596	bp005904		4.19
I7DXA4	PGA1_c03550,lpd2	465	1.6.2.6						6.96e-166	Q9SPB1	bp005904		1.89
I7EUR0	PGA1_c07240	330	2.7.1.92	K03338					1.62e-55	Q5KYR3			1.65
I7EX92	PGA1_c17370,uvrA	966	3.6.3.-						1.12e-09	Q50801			0.64
I7EX92	PGA1_c17370,uvrA	966	7.5.2.6						9.08e-09	Q60AA3			0.64
I7EX92	PGA1_c17370,uvrA	966	7.3.2.2						7.73e-08	Q6RCE0			0.64
I7EYZ1	PGA1_c14320	262	3.6.1.54						5.61e-39	Q9A716			0.73
I7F315	PGA1_c31170	152	1.20.4.4						3.36e-09	P45947			0.64
I7F1Z8	PGA1_c26765	228	3.4.21.-						3.29e-05	Q8VZ48			0.64
I7F1Z8	PGA1_c26765	228	3.4.21.105						6.62e-07	Q9CAN1			0.64
I7F3R1	PGA1_c34290,msrA1,msrA	173	1.8.4.11	K07304	WP_014881472	T			6.06e-104	Q82I51	bp010354		4.1
I7DN47	PGA1_c08090,cobM	264	2.1.1.133	K05936	WP_014879406	T			1.84e-131	O68100	bp003835		4.19
I7DN47	PGA1_c08090,cobM	264	2.1.1.271	K05936					8.62e-62	Q58973	bp003835		2.6
I7DVK3	PGA1_c34600,argJ	409	2.3.1.35	K00620	WP_014881496	T			0	Q5LWL6			3.24
I7DVK3	PGA1_c34600,argJ	409	2.3.1.1	K00620	WP_014881496	T			0	Q5LWL6			3.24
I7ELJ5	PGA1_c14000,xylA	434	5.3.1.5	K01805	WP_014879882	T			0	Q98CR8			3.24
I7DYQ3	PGA1_c08740,gluD	476	1.4.1.3	K00261	WP_014879461				5.61e-149	Q53199			2.48
I7E4W5	PGA1_c31770	684	3.1.4.52						3.95e-67	P77334			0.78
I7EPU8	PGA1_c26000	303	1.18.1.-						2.62e-18	A0QTU9			0.64
I7EPU8	PGA1_c26000	303	1.14.12.15						3.54e-18	Q3C1D2			0.64
I7EPU8	PGA1_c26000	303	7.2.1.1						1.91e-17	Q5QYQ8			0.64
I7ER57	PGA1_c31360	424	2.7.1.165	K11529					1.24e-65	Q9X1S1			1.65
I7ER57	PGA1_c31360	424	2.7.1.31						4.08e-58	Q0VGK3			0.78
I7ER57	PGA1_c31360	424	1.1.1.81						1.59e-56	Q44472			0.78
I7E3L3	PGA1_c26610	270	4.2.2.n1						0.005	A8ZWR8			0.64
I7E3L3	PGA1_c26610	270	4.2.1.51						1.18e-05	Q01269			0.64
I7E3L3	PGA1_c26610	270	4.2.1.91						1.18e-05	Q01269			0.64
I7EWZ4	PGA1_c06400	213	2.3.1.-	K18234					6.34e-36	P26840			1.6
I7EWZ4	PGA1_c06400	213	2.3.1.28						3.36e-33	P26841			0.73
I7DW77	PGA1_262p00090	703	2.7.10.-						2.4e-36	Q9F7B1			0.73
I7E6R0	PGA1_78p00230	516	7.1.1.2	K05577					1.1e-44	Q35099			1.6
I7DPM0	PGA1_c12940,adk2,adk	227	2.7.4.3	K00939	WP_014879794	T			1.12e-92	B6IRS7			3.15
I7DWV4	PGA1_262p02300	423	1.1.1.-	K02474									0.87
I7DWV4	PGA1_262p02300	423	1.1.1.336						2.32e-57	A6VK13			0.78
I7DWV4	PGA1_262p02300	423	1.1.1.136						6.77e-69	G3XD94			0.78
I7E2P4	PGA1_c23450,acdA2	386	1.3.99.-		WP_014880636	T			2.79e-63	P45867			2.21
I7E2P4	PGA1_c23450,acdA2	386	1.3.8.7	K00249					1.82e-60	Q3SZB4			1.65
I7E2P4	PGA1_c23450,acdA2	386	1.3.1.95						2.66e-62	G3KIM8			0.78
I7E2P4	PGA1_c23450,acdA2	386	1.3.8.1						1.7e-64	P15651			0.78
I7E638	PGA1_c36480,ubiE	250	2.1.1.163	K03183		T			1.06e-173	Q1GC56			2.57
I7E638	PGA1_c36480,ubiE	250	2.1.1.201	K03183		T			1.06e-173	Q1GC56			2.57
I7E638	PGA1_c36480,ubiE	250	2.1.1.-		WP_014876527								0.67
I7EMA0	PGA1_c16590	803	1.2.4.1	K00163		T			1.52e-42	Q8NNF6			2.36
I7F1N8	PGA1_c35260,hslV	187	3.4.25.2	K01419		T			7.52e-123	Q16CY0			2.57
I7F1N8	PGA1_c35260,hslV	187	3.4.25.-		WP_014881547								0.67
I7DY51	PGA1_c06340	474	1.1.99.39						5.64e-87	O23240			0.85
I7DY51	PGA1_c06340	474	1.1.2.4						2.66e-87	P46681			0.85
I7DY51	PGA1_c06340	474	1.1.99.40						2.66e-87	P46681			0.85
I7E3V5	PGA1_c27880,nagA	386	3.5.1.25	K01443	WP_014880977	T			5.43e-80	O32445			3.08
I7EWL1	PGA1_c14810,ntrX	471	1.1.1.144						2.02e-50	O85057			0.73
I7EWL1	PGA1_c14810,ntrX	471	1.1.1.243						2.02e-50	O85057			0.73
I7EWL1	PGA1_c14810,ntrX	471	1.14.14.52						2.02e-50	O85057			0.73
I7EWL1	PGA1_c14810,ntrX	471	1.14.14.51						2.02e-50	O85057			0.73
I7EWL1	PGA1_c14810,ntrX	471	3.5.1.44						6.57e-07	O85128			0.64
I7EWL1	PGA1_c14810,ntrX	471	3.1.1.61						6.57e-07	O85128			0.64
I7EWL1	PGA1_c14810,ntrX	471	2.7.1.-						8.2e-12	P23914			0.64
I7EWL1	PGA1_c14810,ntrX	471	2.7.13.3						3.44e-07	Q95PI2			0.64
I7EWL1	PGA1_c14810,ntrX	471	3.1.4.-						1.26e-06	Q9WY30			0.64
I7EUA3	PGA1_c05350	1544	5.1.1.11						9.11e-68	O30408			0.78
I7EUA3	PGA1_c05350	1544	5.1.1.12						2.16e-61	O68007			0.78
I7EUA3	PGA1_c05350	1544	5.1.1.13						1.51e-65	O68008			0.78
I7EUA3	PGA1_c05350	1544	1.-.-.-						1.83e-70	Q70LM4			0.78
I7EUA3	PGA1_c05350	1544	2.3.1.-						4.11e-64	Q9R9J1			0.78
I7EVB1	PGA1_c09880,pepN	854	3.4.11.2	K01256	WP_014879546	T			0	P37893			3.24
I7EVB1	PGA1_c09880,pepN	854	3.4.11.14						0	Q8H0S9			0.94
I7EVB1	PGA1_c09880,pepN	854	3.4.11.3						6.57e-27	Q9UIQ6			0.73
I7EVU7	PGA1_c11790	842	2.7.13.3						2.18e-71	P0C0F7			0.78
I7EVU7	PGA1_c11790	842	3.1.3.-						1.81e-70	Q8D5Z6			0.78
I7F553	PGA1_65p00430	347	2.4.1.288						0.000408	A0R628			0.64
I7F553	PGA1_65p00430	347	2.4.1.54						1.09e-10	C5CBV8			0.64
I7F1E8	PGA1_c24550	383	2.6.1.85	K01665					8.29e-66	F2RB79			1.65
I7F1E8	PGA1_c24550	383	4.1.3.27						1.09e-52	Q9Z4W7			0.78
I7F3Z1	PGA1_c35390,regA	184	2.7.-.-						8.03e-07	P06628			0.64
I7F3Z1	PGA1_c35390,regA	184	3.1.1.61						2e-06	Q10WZ6			0.64
I7F3Z1	PGA1_c35390,regA	184	3.5.1.44						2e-06	Q10WZ6			0.64
I7F3Z1	PGA1_c35390,regA	184	2.7.13.3						0.001	Q95PI2			0.64
I7F3Z1	PGA1_c35390,regA	184	3.1.4.-						8.58e-05	Q9WY30			0.64
I7ENB0	PGA1_c20630	419	3.1.4.46	K01126					5.47e-08	Q06282			1.51
I7E0Z6	PGA1_c16720	383	4.4.1.13						9.95e-64	A2RM21			0.78
I7E0Z6	PGA1_c16720	383	4.4.1.1						1.02e-64	O05394			0.78
I7E0Z6	PGA1_c16720	383	4.4.1.11						2.65e-72	P13254			0.78
I7E0Z6	PGA1_c16720	383	4.4.1.2						2.65e-72	P13254			0.78
I7E0Z6	PGA1_c16720	383	4.4.1.28						8.98e-70	Q8RDT4			0.78
I7ELR0	PGA1_c14660	182	1.11.1.15			T			2.33e-92	O69777	bp001748		2.56
I7ELR0	PGA1_c14660	182	1.11.1.17						2.77e-50	B3EWI1			0.73
I7ESG5	PGA1_c36470,ubiB	511	2.7.-.-			T			3.91e-116	Q9K0N0			1.61
I7EZ34	PGA1_c14790,ntrC	470	1.1.1.144						7.53e-25	O85057			0.73
I7EZ34	PGA1_c14790,ntrC	470	1.1.1.243						7.53e-25	O85057			0.73
I7EZ34	PGA1_c14790,ntrC	470	1.14.14.52						7.53e-25	O85057			0.73
I7EZ34	PGA1_c14790,ntrC	470	1.14.14.51						7.53e-25	O85057			0.73
I7EZ34	PGA1_c14790,ntrC	470	2.7.-.-						4.76e-06	P06628			0.64
I7EZ34	PGA1_c14790,ntrC	470	2.7.13.3						1.18e-06	P0DOA0			0.64
I7EZ34	PGA1_c14790,ntrC	470	3.5.1.44						1.56e-05	Q8F6P9			0.64
I7EZ34	PGA1_c14790,ntrC	470	3.1.1.61						1.56e-05	Q8F6P9			0.64
I7EZ34	PGA1_c14790,ntrC	470	3.1.4.-						1.1e-06	Q9WY30			0.64
I7EJK8	PGA1_c06180	309	4.-.-.-						4.09e-28	O31608			0.73
I7EJK8	PGA1_c06180	309	4.2.2.-						4.33e-25	O31976			0.73
I7EJK8	PGA1_c06180	309	4.2.2.n1						4.33e-25	O64046			0.73
I7EJN5	PGA1_c06580,ilvC	340	1.1.1.86	K00053	WP_014873754	T			0	Q5LTP7	bp009027		4.19
I7DM21	PGA1_c04520	985	3.4.22.-						2.1e-14	P59653			0.64
I7DM21	PGA1_c04520	985	3.6.3.-						1.46e-15	P71082			0.64
I7DM21	PGA1_c04520	985	7.6.2.-						2.15e-15	P9WQJ3			0.64
I7DM21	PGA1_c04520	985	7.5.2.6						4.13e-18	Q8XXB6			0.64
I7DWR1	PGA1_c01280	276	1.1.1.239						1.49e-24	O54753			0.73
I7DWR1	PGA1_c01280	276	1.1.1.62						1.49e-24	O54753			0.73
I7DWR1	PGA1_c01280	276	1.1.1.105						1.49e-24	O54753			0.73
I7DWR1	PGA1_c01280	276	1.1.1.300						1.62e-24	Q9N126			0.73
I7EJ57	PGA1_c04490,iorAB	1140	1.2.7.8	K04090					2.15e-17	P80910			1.51
I7EZV6	PGA1_c28110,xdhB	801	1.17.1.4	K13482	WP_014880995	T			0	P22985			3.24
I7EZV6	PGA1_c28110,xdhB	801	1.17.3.2						0	P22985			0.94
I7F2C9	PGA1_c28680	858	2.7.11.1						1.76e-40	P25848			0.73
I7F2C9	PGA1_c28680	858	2.7.13.3						5.89e-91	Q9R6X3			0.85
I7EL83	PGA1_c12860	279	7.6.2.7						1.98e-62	Q4FMG5			0.78
I7EL83	PGA1_c12860	279	3.6.3.-						3.32e-62	Q63A38			0.78
I7ES42	PGA1_c35420,ahcY	463	3.3.1.1	K01251	WP_014881559	T			0	Q9ZNA5	bp013798		4.19
I7ESV5	PGA1_262p01570	740	2.4.1.-						1.29e-07	B9SLR1			0.64
I7EVP4	PGA1_c01190	135	2.7.1.191	K02793					2.06e-07	P69800			1.51
I7DL36	PGA1_c00750	249	2.3.1.129						9.64e-20	A0K8D1			0.64
I7EV47	PGA1_c08910,ribE	197	2.5.1.9	K00793	WP_014879477	T			2.72e-69	Q2YN92			3.08
I7F0Q1	PGA1_c21450	514	3.6.1.11	K01524									0.87
I7F0Q1	PGA1_c21450	514	3.6.1.40	K01524					2.73e-18	B2VG72			1.51
I7EY98	PGA1_c21610	482	3.4.24.40						2.11e-28	Q84F70			0.73
I7DP01	PGA1_c10430,nuoF	432	7.1.1.-			T			0	P29913			1.7
I7DP01	PGA1_c10430,nuoF	432	7.1.1.2	K00335					0	Q9FNN5			1.81
I7DP01	PGA1_c10430,nuoF	432	1.6.5.11		WP_014879591								0.67
I7DP01	PGA1_c10430,nuoF	432	1.6.99.3						0	Q9FNN5			0.94
I7DTU0	PGA1_c28350	232	2.4.2.-						3.14e-27	O33341			0.73
I7DTU0	PGA1_c28350	232	4.1.3.27						1.78e-08	P9WN35			0.64
I7DTU0	PGA1_c28350	232	6.3.5.2						6.26e-08	Q4JTG0			0.64
I7DTU0	PGA1_c28350	232	3.5.1.94						5.66e-17	Q8X7G2			0.64
I7DVH0	PGA1_c34300	668	3.5.2.-						8.42e-25	Q01262			0.73
I7DVH0	PGA1_c34300	668	6.4.1.8						1.19e-17	Q5P5G4			0.64
I7DVH0	PGA1_c34300	668	6.4.1.6						2.15e-09	Q8RM04			0.64
I7DVH0	PGA1_c34300	668	3.5.2.9						5.05e-06	Q9FIZ7			0.64
I7ELM7	PGA1_c14300,fabZ	154	4.2.1.59	K02372		T			6.25e-97	Q5LSU4			2.48
I7ELM7	PGA1_c14300,fabZ	154	4.2.1.-		WP_014874544								0.67
I7ENR7	PGA1_c22170	308	3.1.1.-	K01066					1.16e-22	A9MW81			1.6
I7ENR7	PGA1_c22170	308	3.1.8.1						2.51e-22	B5BLW5			0.73
I7ENR7	PGA1_c22170	308	3.1.1.2						2.51e-22	B5BLW5			0.73
I7ENR7	PGA1_c22170	308	3.1.1.1						5.37e-37	P9WK87			0.73
I7EPW6	PGA1_c26200	105	1.13.12.21						8.14e-13	P39889			0.64
I7DMJ6	PGA1_c05860,ruvA	229	3.6.4.12	K03550		T			3.21e-104	Q5LNT7			2.48
I7DMJ6	PGA1_c05860,ruvA	229	3.6.1.-		WP_014879233								0.67
I7E3I4	PGA1_c26260	173	2.3.1.-						4.3e-06	P94482			0.64
I7E3I4	PGA1_c26260	173	6.3.5.2						2.29e-11	Q7VG78			0.64
I7EWP2	PGA1_c15220,guaB	482	1.1.1.205	K00088	WP_014879972	T			0	Q9L6B7			3.24
I7F4F9	PGA1_262p00380	227	2.7.8.40						5.77e-24	O32274			0.73
I7F4F9	PGA1_262p00380	227	2.7.8.6						6.64e-61	P26406			0.78
I7F4F9	PGA1_262p00380	227	2.7.8.31						8.75e-30	P71241			0.73
I7F4F9	PGA1_262p00380	227	2.7.8.36						1.51e-34	Q0P9D0			0.73
I7DT33	PGA1_c25710,stcD	681	1.-.-.-		WP_014880798	T							1.43
I7DT33	PGA1_c25710,stcD	681	1.5.3.-	K22551									0.87
I7DT33	PGA1_c25710,stcD	681	1.6.99.1						4.48e-24	A0ALF5			0.73
I7DT33	PGA1_c25710,stcD	681	1.16.1.-						4.14e-58	A4J778			0.78
I7DT33	PGA1_c25710,stcD	681	1.3.1.-						1.82e-46	G9F1Y9			0.73
I7DT33	PGA1_c25710,stcD	681	1.5.8.2						6.19e-34	P16099			0.73
I7DT33	PGA1_c25710,stcD	681	1.3.1.115						4.71e-50	P19410			0.73
I7DT33	PGA1_c25710,stcD	681	1.3.1.116						4.5e-66	P32370			0.78
I7DT33	PGA1_c25710,stcD	681	1.3.1.34						6.4e-54	P42593			0.78
I7DT33	PGA1_c25710,stcD	681	1.5.8.1						3.55e-33	Q48303			0.73
I7EUB9	PGA1_c05550	483	6.3.1.2	K01915					2.23e-52	A0R083			1.65
I7EUB9	PGA1_c05550	483	6.3.4.12						2.99e-47	F5RH07			0.73
I7EUB9	PGA1_c05550	483	6.3.1.18						5.27e-106	Q44249			0.85
I7F0Y8	PGA1_c22710	392	1.3.99.-						8.24e-51	O34421			0.78
I7F0Y8	PGA1_c22710	392	1.3.8.10						9.5e-50	Q2LQN9			0.73
I7F0Y8	PGA1_c22710	392	1.3.8.1						5.69e-49	Q5RAS0			0.73
I7F449	PGA1_c36070,uppP	268	3.6.1.27	K06153	WP_014881597	T			9.67e-138	Q5LLZ3			3.24
I7DME1	PGA1_c05240	376	2.1.1.-	K07444									0.87
I7DME1	PGA1_c05240	376	2.1.1.264						7.17e-52	A6VW36			0.78
I7DME1	PGA1_c05240	376	2.1.1.173						1.32e-53	Q9K0V4			0.78
I7EK81	PGA1_c08870,ribD	358	3.5.4.26	K11752	WP_014879474	T			1.72e-88	O66534			3.15
I7EK81	PGA1_c08870,ribD	358	1.1.1.193	K11752	WP_014879474	T			1.72e-88	O66534			3.15
I7ERG1	PGA1_c32800	802	1.2.1.3	K00128					4.74e-120	O34660			1.72
I7ERG1	PGA1_c32800	802	1.2.1.5						1.61e-118	P40047			0.85
I7EKZ6	PGA1_c11690	175	3.1.2.-						0.002	P34419			0.64
I7EP63	PGA1_c23930	369	2.6.1.9	K00817					1.21e-50	Q3AAT6			1.6
I7EU12	PGA1_c04780,metK	393	2.5.1.6	K00789	WP_014873579	T			0	Q5LLL2			3.24
I7F0Q3	PGA1_c31300	370	7.6.2.11	K11072					4.79e-91	Q1AS06			1.72
I7F0Q3	PGA1_c31300	370	7.2.2.7						1.73e-87	Q578K3			0.85
I7EJ66	PGA1_c04590	324	4.3.1.19	K01754					8.44e-48	Q8NWQ4			1.6
I7EJ66	PGA1_c04590	324	4.3.1.16						2.93e-65	A4F2N8			0.78
I7EJ66	PGA1_c04590	324	4.3.1.17						6.19e-60	Q54HH2			0.78
I7EJ66	PGA1_c04590	324	5.1.1.18						6.19e-60	Q54HH2			0.78
I7EJ66	PGA1_c04590	324	4.3.1.18						6.19e-60	Q54HH2			0.78
I7EWB9	PGA1_c13680	316	3.1.1.85						3.79e-06	B4SM83			0.64
I7EWB9	PGA1_c13680	316	6.6.1.1						1.75e-06	P26174			0.64
I7DMK8	PGA1_c06010,folD	300	1.5.1.5	K01491	WP_014879245	T			0	Q1GE28			3.24
I7DMK8	PGA1_c06010,folD	300	3.5.4.9	K01491	WP_014879245	T			0	Q1GE28			3.24
I7EXA7	PGA1_c17570,pdhC	441	2.3.1.12	K00627	WP_014880146	T			1.74e-146	Q9R9N3			3.24
I7EY47	PGA1_c20970	259	3.5.1.-						0.002	B1ZB18			0.64
I7EY47	PGA1_c20970	259	3.1.1.85						0.003	Q2NQH6			0.64
I7EY47	PGA1_c20970	259	2.3.1.12						0.000142	Q59695			0.64
I7EY47	PGA1_c20970	259	3.1.1.93						3.57e-40	Q6PE15			0.73
I7EY47	PGA1_c20970	259	3.1.1.23						0.002	Q99685			0.64
I7EPV6	PGA1_c26100	326	1.14.19.20						1.35e-09	Q7SBB6			0.64
I7EYC3	PGA1_c11870,glyA	432	2.1.2.1	K00600	WP_014879703	T			0	Q1GGA4			3.24
I7EXY6	PGA1_c20280,mrcA	833	2.4.2.-		WP_014880361	T							1.43
I7EXY6	PGA1_c20280,mrcA	833	3.4.-.-		WP_014880361	T							1.43
I7EXY6	PGA1_c20280,mrcA	833	2.4.1.129	K05366					0	Q1RKC5			1.81
I7EXY6	PGA1_c20280,mrcA	833	3.4.16.4	K05366					0	Q1RKC5			1.81
I7DLH0	PGA1_c02570,pcaC	141	4.1.1.44	K01607					1.04e-27	P20370			1.6
I7DS42	PGA1_c21950,amiD	237	3.5.1.28						2.96e-27	P75820			0.73
I7DYC7	PGA1_c07260	401	1.1.1.-						3.13e-17	B9JK80			0.64
I7DYC7	PGA1_c07260	401	1.1.1.370						2.56e-15	P40332			0.64
I7DYC7	PGA1_c07260	401	1.1.1.18						2.24e-22	Q9WYP5			0.73
I7E5G7	PGA1_c34430,potG,potA	375	7.6.2.11			T			3.62e-113	Q1AS06			1.61
I7ENI4	PGA1_c21080	345	1.14.14.-	K23464									0.87
I7ENI4	PGA1_c21080	345	1.14.14.3						3.21e-20	P07740			0.64
I7ENI4	PGA1_c21080	345	1.14.13.107						3.28e-08	Q9EUT9			0.64
I7EP53	PGA1_c23830	165	6.3.5.2						0.000318	Q7VG78			0.64
I7EP53	PGA1_c23830	165	2.3.1.-						4.04e-06	Q9HX72			0.64
I7ER42	PGA1_c31200	180	2.3.1.266						5.79e-06	P0A944			0.64
I7ER42	PGA1_c31200	180	2.3.1.82						3.16e-05	P10051			0.64
I7EX88	PGA1_c17320	199	2.-.-.-						5.85e-65	P05448			0.78
I7DQG1	PGA1_c15620	340	1.13.12.16	K00459					1.19e-09	Q4L4T4			1.51
I7E336	PGA1_c24800,cysC	691	2.7.1.25		WP_014875384	T							1.43
I7E336	PGA1_c24800,cysC	691	2.7.7.4	K00958	WP_014875384				0	Q8J0I4	bp005841		3.43
I7ELT0	PGA1_c14870,quiP	829	3.5.1.97		WP_014879947	T			7.36e-66	Q9I4U2			2.21
I7ELT0	PGA1_c14870,quiP	829	3.5.1.11	K01434					1.79e-65	P15558			1.65
I7EXK3	PGA1_c08790,dnaG	749	2.7.7.-		WP_014879467	T			5.76e-91	Q4UJT0			2.28
I7EXK3	PGA1_c08790,dnaG	749	2.7.7.101	K02316					5.76e-91	Q4UJT0			1.72
I7F235	PGA1_c36460	464	4.2.2.n1						1.41e-29	P41052			0.73
I7E0T8	PGA1_c15980,fabF1	402	2.3.1.179		WP_014880024	T			1.1e-106	Q7A6F8			2.28
I7E0T8	PGA1_c15980,fabF1	402	2.3.1.-	K14660					1.64e-125	P72331			1.81
I7E3K0	PGA1_c26460	510	2.7.1.68						4.36e-29	Q8RY89			0.73
I7ESE8	PGA1_c36320,hutU	559	4.2.1.49	K01712	WP_014881614	T			0	Q92V80	bp008717		4.19
I7DZC5	PGA1_c10650	259	1.1.1.100	K00059					5.51e-31	Q9KQH7			1.6
I7DZC5	PGA1_c10650	259	1.3.1.-						1.45e-27	P39644			0.73
I7DZC5	PGA1_c10650	259	1.1.1.184						3.36e-26	Q9GKX2			0.73
I7ES23	PGA1_c35220	200	3.1.-.-						1.17e-06	P76053			0.64
I7F2D1	PGA1_262p01210,norQ	264	6.6.1.2						3.48e-05	P29933			0.64
I7DZ10	PGA1_c09800,bla	297	3.5.2.6	K17836	WP_014879539	T			7.7e-76	P0AD64			3.08
I7EMC0	PGA1_c16920,moaC	156	4.6.1.17	K03637		T			3.37e-78	A8LMJ8			2.41
I7DML7	PGA1_c06110	481	7.4.2.8	K02283									0.87
I7DSM9	PGA1_c23910,fda	300	4.1.2.13	K01623	WP_014880672	T			5.36e-121	Q8RGH3			3.24
I7EUU6	PGA1_c07690,mdlB	363	1.1.99.31		WP_014879373	T			3.16e-78	P20932	bp015052		3.16
I7F277	PGA1_c27890	342	2.6.1.16	K00820					1.07e-39	Q8TZ14			1.6
I7EUY2	PGA1_c08100	125	3.7.1.12	K02189									0.87
I7EVJ2	PGA1_c10490,nuoI	164	7.1.1.-			T			2.41e-117	Q1GIM9			1.61
I7EVJ2	PGA1_c10490,nuoI	164	7.1.1.2	K00338					2.41e-117	Q1GIM9			1.72
I7EVJ2	PGA1_c10490,nuoI	164	1.6.5.11		WP_014879596								0.67
I7EWX3	PGA1_c15800	346	2.7.13.3	K07636					8.04e-60	P23545			1.65
I7EJE6	PGA1_c05260	241	2.7.8.40						4.43e-24	O32274			0.73
I7EJE6	PGA1_c05260	241	2.7.8.6						2.09e-51	P26406			0.78
I7EJE6	PGA1_c05260	241	2.7.8.31						2.43e-19	P71241			0.64
I7EJE6	PGA1_c05260	241	2.7.8.36						3.13e-28	Q0P9D0			0.73
I7EWW5	PGA1_c15690	257	1.1.1.1						7.36e-24	A5JYX5			0.73
I7EWW5	PGA1_c15690	257	1.1.1.340						9.8e-25	E3VWK2			0.73
I7EWW5	PGA1_c15690	257	1.3.1.-						8.8e-24	P37694			0.73
I7EWW5	PGA1_c15690	257	1.1.1.105						1.27e-24	Q8N3Y7			0.73
I7E3W7	PGA1_c28030	214	2.7.1.33						2.31e-09	A0AH37			0.64
I7E3W7	PGA1_c28030	214	2.7.1.48						5e-24	Q9UTC5			0.73
I7EQ99	PGA1_c28070	400	3.2.1.183						0.000215	O35826			0.64
I7EQ99	PGA1_c28070	400	2.7.1.60						5.78e-07	Q8D612			0.64
I7EQ99	PGA1_c28070	400	2.7.1.85						1.26e-05	Q93LQ8			0.64
I7EQ99	PGA1_c28070	400	2.7.1.2						3.02e-05	Q9KCZ4			0.64
I7DUE3	PGA1_c30490	320	4.1.3.24	K08691					0	A4WVF5	bp009878		2.76
I7DUE3	PGA1_c30490	320	4.1.3.25	K08691					0	Q3J5L6			1.81
I7DUE3	PGA1_c30490	320	3.1.2.30						3.86e-42	A3PN16			0.73
I7EWK7	PGA1_c14760,ispDF	406	2.7.7.60	K12506		T			6.05e-178	Q1GGW9			2.57
I7EWK7	PGA1_c14760,ispDF	406	4.6.1.12	K12506		T			6.05e-178	Q1GGW9	bp009215		3.52
I7F0F4	PGA1_c30400,alkJ1	529	1.1.99.-		WP_014881172	T							1.43
I7F0F4	PGA1_c30400,alkJ1	529	1.1.99.1						5.82e-137	Q6LGH5			0.94
I7F0F4	PGA1_c30400,alkJ1	529	1.2.1.8						5.82e-137	Q6LGH5			0.94
I7F1W7	PGA1_c26270	494	3.4.16.4	K07259					2.32e-20	P24228			1.51
I7F1W7	PGA1_c26270	494	3.4.21.-	K07259					2.32e-20	P24228			1.51
I7DXF9	PGA1_c04100	548	3.1.6.-		WP_014879087	T							1.43
I7DXF9	PGA1_c04100	548	3.1.6.6						2.62e-31	O69787			0.73
I7DXF9	PGA1_c04100	548	3.1.6.1						3.51e-46	Q0TUK6			0.73
I7DXF9	PGA1_c04100	548	3.1.4.-						4.02e-62	Q1M964			0.78
I7DXF9	PGA1_c04100	548	3.1.3.-						4.02e-62	Q1M964			0.78
I7EJ88	PGA1_c04890	387	3.5.1.46						1.3e-31	P07061			0.73
I7EJK4	PGA1_c06130	208	1.97.1.12						4.76e-09	Q7NFT5			0.64
I7EWH3	PGA1_c14340,mnmA	381	2.8.1.13	K00566		T			0	Q5LST9			2.57
I7EWH3	PGA1_c14340,mnmA	381	2.8.1.-		WP_014879907								0.67
I7F4A2	PGA1_c36290	314	4.3.1.19	K01754					4.44e-31	Q04513			1.6
I7F4A2	PGA1_c36290	314	4.2.1.-						1.23e-45	Q10725			0.73
I7F4A2	PGA1_c36290	314	5.1.1.18						3.11e-32	Q54HH2			0.73
I7F4A2	PGA1_c36290	314	4.3.1.18						3.11e-32	Q54HH2			0.73
I7F4A2	PGA1_c36290	314	4.3.1.17						3.11e-32	Q54HH2			0.73
I7F4F4	PGA1_262p00330	332	3.6.3.-						2.85e-100	Q8VQK6			0.85
I7F4F4	PGA1_262p00330	332	7.4.2.10						1.43e-81	Q8X6W1			0.85
I7E5J8	PGA1_c34730	276	1.-.-.-						1.33e-46	A3KP37			0.73
I7E5J8	PGA1_c34730	276	2.1.1.197						8.27e-24	C1D5S5			0.73
I7DVY5	PGA1_c35960,ptsN	154	2.7.1.-	K02806	WP_014876479	T							2.3
I7DVY5	PGA1_c35960,ptsN	154	2.7.1.191						5.06e-06	O31645			0.64
I7DVY5	PGA1_c35960,ptsN	154	2.7.1.195						1.33e-06	P54745			0.64
I7DVY5	PGA1_c35960,ptsN	154	2.7.1.202						1.76e-09	P71012			0.64
I7DVY5	PGA1_c35960,ptsN	154	2.7.3.9						0.000532	Q8XBQ8			0.64
I7DVY5	PGA1_c35960,ptsN	154	2.7.1.197						0.000241	Q9KKQ7			0.64
I7EP23	PGA1_c23530,folE2	367	3.5.4.16	K09007		T			0	Q1GF96			2.57
I7EXP3	PGA1_c09230,hisE	105	3.6.1.31	K01523	WP_014874045	T			4.04e-56	Q1GEZ2			3.08
I7DN31	PGA1_c07930	221	2.7.11.1						2.25e-07	Q54Q69			0.64
I7DN31	PGA1_c07930	221	2.7.13.3						3.77e-10	Q8KIY1			0.64
I7DN31	PGA1_c07930	221	2.7.7.65						5.12e-08	Q9A5I5			0.64
I7DT18	PGA1_c25490,hisD2,hisD	421	1.1.1.23		WP_014880783	T			0	Q5LUS2			2.37
I7DT18	PGA1_c25490,hisD2,hisD	421	1.1.1.308	K15509					4.32e-161	Q46N53			1.81
I7EVT6	PGA1_c11630,valS	1024	6.1.1.9	K01873	WP_014879684	T			0	Q5LP30			3.24
I7EY78	PGA1_c11310	164	4.4.1.22						0.001	E1VBT6			0.64
I7EZ49	PGA1_c14990,arsC	158	1.20.4.4	K03741					5.52e-17	Q9K8K8			1.51
I7E227	PGA1_c20740,cobA2	277	2.1.1.107	K02303		T			2.8e-56	Q3ILQ9			2.41
I7E227	PGA1_c20740,cobA2	277	4.99.1.4						2.8e-56	Q3ILQ9			0.78
I7E227	PGA1_c20740,cobA2	277	1.3.1.76						2.8e-56	Q3ILQ9			0.78
I7EMG0	PGA1_c17530,pgk	396	2.7.2.3	K00927	WP_014880142	T			0	Q1GHP9			3.24
I7ETN8	PGA1_c03240,mobA	213	2.7.7.77	K03752		T			4.7e-58	A4Z027			2.41
I7DPB6	PGA1_c11880	253	2.7.1.23	K00858		T			1.73e-120	Q3IZN1			2.48
I7DZ98	PGA1_c10410,nqo2	397	1.6.5.11		WP_014879590	T							1.43
I7DZ98	PGA1_c10410,nqo2	397	7.1.1.2	K00334					2.39e-53	Q0MQI9			1.65
I7DZ98	PGA1_c10410,nqo2	397	1.6.99.3						2.39e-53	Q0MQI9			0.78
I7E168	PGA1_c17690,cysE	271	2.3.1.30	K00640	WP_014880158	T			3.91e-97	P29847	bp015125		4.1
I7E321	PGA1_c24650	233	1.-.-.-						7.37e-100	B7J950	bp002620		1.8
I7E321	PGA1_c24650	233	1.7.-.-						4.74e-07	O07529	bp002620		1.59
I7E321	PGA1_c24650	233	1.6.5.2						1.64e-86	P74312	bp002620		1.8
I7E321	PGA1_c24650	233	1.7.1.17						1.65e-06	Q50H63	bp002620		1.59
I7DX77	PGA1_65p00440	336	5.1.3.12		WP_014876635	T	fig|391619.35.peg.47		3.11e-127	O54067			3.19
I7DX77	PGA1_65p00440	336	5.1.3.6	K08679					2.41e-90	O22141			1.72
I7DX77	PGA1_65p00440	336	4.-.-.-						4.03e-115	P39858			0.85
I7DX77	PGA1_65p00440	336	5.1.3.2						1.01e-29	Q57664			0.73
I7ELS1	PGA1_c14770,dusB	337	1.3.1.-			T			4.54e-120	Q08111			1.61
I7ELS1	PGA1_c14770,dusB	337	1.-.-.-		WP_014879939								0.67
I7DWG9	PGA1_c00310	324	3.5.3.10		WP_014878832	T			1.38e-78	Q8KZT5			2.21
I7DWG9	PGA1_c00310	324	3.5.3.7		WP_014878832	T			6.67e-103	Q9I3S3			2.28
I7DWG9	PGA1_c00310	324	3.5.3.17	K18459					8.66e-123	Q9I6K2			1.81
I7DWG9	PGA1_c00310	324	3.5.3.22						1.81e-69	P0DJQ3			0.78
I7DWG9	PGA1_c00310	324	3.5.3.11						9.28e-86	Q90XD2			0.85
I7EY24	PGA1_c10570,coaX	262	2.7.1.33	K03525	WP_014874171	T			3e-159	Q163S6			3.24
I7DNG5	PGA1_c09130,bioF	379	2.3.1.47	K00652	WP_014879490	T			5.24e-69	Q31E54			3.08
I7ELW0	PGA1_c15170,pgl	223	3.1.1.31	K01057	WP_014879969	T			1.08e-32	Q989A3			3.03
I7EWK1	PGA1_c04660,fabA	169	4.2.1.59	K01716	WP_014879135	T			1.4e-76	B0T7B6			3.08
I7EWK1	PGA1_c04660,fabA	169	5.3.3.14	K01716					1.4e-76	B0T7B6			1.65
I7E3T0	PGA1_c27520	429	1.5.-.-						0.000307	B2HYP8			0.64
I7E3T0	PGA1_c27520	429	2.1.1.61						0.000307	B2HYP8			0.64
I7E3T0	PGA1_c27520	429	1.3.3.4						0.000114	Q8S9J1			0.64
I7E3T0	PGA1_c27520	429	1.4.3.2						0.00012	X2JCV5			0.64
I7ELM2	PGA1_c14250,dxr	390	1.1.1.267	K00099	WP_014879901	T			0	Q1GGS3			3.24
I7F095	PGA1_c19750,ndk	140	2.7.4.6	K00940	WP_014874960	T			1.04e-93	Q5LQP4			3.15
I7DRD5	PGA1_c19380	210	3.1.-.-						0.000434	P06723			0.64
I7DRD5	PGA1_c19380	210	2.7.7.-						0.000434	P06723			0.64
I7DTS5	PGA1_c28200	370	1.4.99.5						1.2e-07	G3XD12			0.64
I7DTS5	PGA1_c28200	370	1.5.8.4						4.87e-12	Q63342			0.64
I7DTS5	PGA1_c28200	370	1.4.99.6						3.56e-72	Q9HXE3			0.78
I7EU93	PGA1_c05250	329	2.7.1.58	K00883					3.65e-09	Q92RN7			1.51
I7F337	PGA1_c31430	249	3.6.3.-						1.79e-31	P45073			0.73
I7DRB3	PGA1_c19170,soxB3	414	1.5.3.1	K00303	WP_014880281	T			0	Q52671			3.24
I7DRB3	PGA1_c19170,soxB3	414	1.4.99.-						5.46e-13	B4RR07			0.64
I7DRB3	PGA1_c19170,soxB3	414	1.5.8.4						2.96e-13	Q63342			0.64
I7DRB3	PGA1_c19170,soxB3	414	1.5.3.19						1.11e-12	Q8GAI3			0.64
I7DRB3	PGA1_c19170,soxB3	414	1.5.8.3						4.23e-13	Q9UL12			0.64
I7DXG4	PGA1_c04150	154	3.1.2.-						9.29e-08	Q9I644			0.64
I7DWT2	PGA1_262p02100	287	2.1.1.80	K00575		T			6.23e-79	Q2KCH9			2.41
I7EQ78	PGA1_c27760	241	7.3.2.6	K06857									0.87
I7EQ78	PGA1_c27760	241	7.3.2.1						5.72e-37	Q8RCU0			0.73
I7EQX3	PGA1_c30770	457	3.1.-.-						2.05e-05	P06155			0.64
I7EQX3	PGA1_c30770	457	2.7.7.-						2.05e-05	P06155			0.64
I7EY53	PGA1_c21070,betB1	488	1.2.1.8		WP_014880422	T			7.88e-121	B1Z033	bp003382		3.32
I7EY53	PGA1_c21070,betB1	488	1.2.1.-	K23463							bp003382		1.82
I7EY53	PGA1_c21070,betB1	488	1.2.1.3						7.41e-118	O34660	bp003382		1.8
I7F2T0	PGA1_78p00610	456	3.6.-.-						2.97e-20	Q9K5N0			0.64
I7EL79	PGA1_c12810	444	1.3.1.1	K17722					6.81e-66	Q8ZNL8			1.65
I7EL79	PGA1_c12810	444	1.4.1.13						6.66e-60	P09832			0.78
I7EL79	PGA1_c12810	444	1.3.1.2						1.02e-46	Q55FT1			0.73
I7EL79	PGA1_c12810	444	1.18.1.2						4.2e-62	Q8U195			0.78
I7EL79	PGA1_c12810	444	1.8.1.19						4.2e-62	Q8U195			0.78
I7EMB0	PGA1_c16760,nrdJ	1214	1.17.4.1	K00525	WP_014880084	T			0	Q89MB9			3.24
I7EK76	PGA1_c08820	224	1.-.-.-						4.9e-38	Q6GDV6			0.73
I7EWF5	PGA1_c04160	501	6.2.1.12						1.07e-61	O24145			0.78
I7EWF5	PGA1_c04160	501	6.2.1.3						1.21e-55	P9WQ37			0.78
I7EVC4	PGA1_c10040,pntB	477	7.1.1.1	K00325		T			0	P0AB70			2.57
I7EVC4	PGA1_c10040,pntB	477	1.6.1.2	K00325	WP_014874121								1.54
I7F3S1	PGA1_c34390,potA	366	7.6.2.11			T			4.31e-99	Q47T99			1.61
I7F0V8	PGA1_c32100,gsiA5	535	3.6.3.-		WP_014881305	T							1.43
I7F0V8	PGA1_c32100,gsiA5	535	7.4.2.10						3e-156	Q8X6W1			0.94
I7F2A2	PGA1_262p00800,paaZ	710	3.3.2.12	K02618					1.07e-111	P77455			1.72
I7F2A2	PGA1_262p00800,paaZ	710	1.2.1.91	K02618					1.07e-111	P77455			1.72
I7F2A2	PGA1_262p00800,paaZ	710	1.2.1.19						1.39e-15	A4WAR9			0.64
I7F2A2	PGA1_262p00800,paaZ	710	1.2.1.3						1.05e-13	Q4L803			0.64
I7F2A2	PGA1_262p00800,paaZ	710	1.2.1.77						5.88e-62	Q84HH8			0.78
I7F0N6	PGA1_c31140	292	3.5.1.128						2.52e-11	P0DP66			0.64
I7F0N6	PGA1_c31140	292	3.5.5.1						1.02e-10	Q6H849			0.64
I7F0N6	PGA1_c31140	292	3.5.5.4						1.02e-10	Q6H849			0.64
I7F0N6	PGA1_c31140	292	3.5.1.3						3.32e-11	Q6INI7			0.64
I7EJH8	PGA1_c05730	162	2.1.1.63	K00567		T			4.68e-32	Q9ZET8			2.36
I7EX30	PGA1_c16580	1083	3.1.1.61	K13924		T							1.63
I7EX30	PGA1_c16580	1083	2.1.1.80	K13924					1.65e-36	Q9KCB8			1.6
I7F198	PGA1_c24000,cobQ	486	6.3.5.10	K02232									0.87
I7F198	PGA1_c24000,cobQ	486	6.3.3.3						3.66e-08	A4SPR4			0.64
I7F198	PGA1_c24000,cobQ	486	4.1.1.81						6.19e-91	Q8EXQ7			0.85
I7DTZ7	PGA1_c28990	180	1.6.5.7						4.89e-21	D3KVM6			0.73
I7DTZ7	PGA1_c28990	180	1.6.5.2						3.92e-28	P0AGE8			0.73
I7DP12	PGA1_c10530,nuoL	708	1.6.5.11		WP_014879599	T							1.43
I7DP12	PGA1_c10530,nuoL	708	7.1.1.2	K00341					5.56e-156	P48920			1.81
I7EMX1	PGA1_c19240	386	2.7.7.-						1.26e-05	P04890			0.64
I7EMX1	PGA1_c19240	386	3.1.-.-						1.26e-05	P04890			0.64
I7ESM2	PGA1_262p00560	481	3.2.2.27	K21929					3.73e-29	Q5SKC5			1.6
I7ESM2	PGA1_262p00560	481	3.1.11.-						4.06e-05	P30314			0.64
[truncated: 2,348 more rows]
